# Supplementary material for: Classification of major species in the sericite–Artemisia desert grassland using hyperspectral images and spectral feature identification
Source: PeerJ journal article supplement (doi:10.7717/peerj.17663), 2024-07-18
Supplement: date.xlsx [file date.xlsx]

## Sheet: Spectral characteristic paramet
Month	Species	Lb	Mb	Lb	Mg	Lr	Mr	Lre	Mre	Ab	Are
April	Seriphidium transiliense	525.43	0.210774	556.6	14.3402	641.32	9.31329	709.11	0.959357	1.76294	16.4665
	Seriphidium transiliense	525.43	0.300238	556.6	16.35	641.32	10.4666	709.11	0.940427	2.28012	13.5468
	Seriphidium transiliense	525.43	0.318867	556.6	17.5661	641.32	13.2514	709.11	0.77944	1.85294	15.3383
	Seriphidium transiliense	525.43	0.263937	556.6	18.8817	641.32	13.8426	709.11	1.21204	2.09025	16.8406
	Seriphidium transiliense	525.43	0.424218	556.6	23.4116	641.32	15.3769	709.11	0.915655	3.10854	24.0419
	Seriphidium transiliense	522.84	0.26849	556.6	18.1297	641.32	12.2527	709.11	0.986558	2.40485	18.0268
	Seriphidium transiliense	525.43	0.210552	556.6	15.1486	641.32	10.1898	709.11	0.638633	1.99503	13.8143
	Seriphidium transiliense	530.6	0.258558	556.6	16.7351	641.32	10.4268	709.11	0.554952	2.41682	19.2954
	Seriphidium transiliense	525.43	0.192228	556.6	14.0989	641.32	9.73816	709.11	0.714669	1.67072	12.3444
	Seriphidium transiliense	525.43	0.378859	559.22	24.5846	641.32	18.7083	709.11	0.519728	2.54165	18.3406
	Seriphidium transiliense	525.43	0.386313	556.6	28.5059	641.32	23.0083	709.11	0.609421	2.63039	20.3771
	Seriphidium transiliense	525.43	0.123394	556.6	9.96713	641.32	8.17175	709.11	0.713772	1.0011	8.83732
	Seriphidium transiliense	530.6	0.154667	556.6	16.1818	646.7	12.6126	709.11	0.590179	1.48521	12.2366
	Seriphidium transiliense	530.6	0.219494	556.6	15.4477	641.32	12.0878	709.11	0.747228	1.58025	12.9003
	Seriphidium transiliense	530.6	0.268722	556.6	19.1364	641.32	15.1207	709.11	0.739359	1.94191	13.3249
	Seriphidium transiliense	530.6	0.264877	556.6	21.2384	644.01	16.453	714.59	0.914137	2.25255	13.5307
	Seriphidium transiliense	520.26	0.249359	556.6	20.6501	644.01	14.7956	714.59	1.00634	2.23451	13.8923
	Seriphidium transiliense	520.26	0.262349	556.6	19.1642	644.01	14.4484	714.59	0.925516	2.03817	12.3916
	Seriphidium transiliense	522.84	0.268573	556.6	23.8636	641.32	17.9886	714.59	0.862998	2.27681	14.7238
	Seriphidium transiliense	525.43	0.174249	553.99	12.4484	641.32	9.48127	714.59	0.777875	1.29684	10.2956
	Seriphidium transiliense	525.43	0.237319	551.39	21.9506	641.32	17.3501	717.34	0.663954	2.0788	15.6506
	Seriphidium transiliense	525.43	0.255034	556.6	14.2039	641.32	9.56038	717.34	1.16106	1.63304	14.1234
	Seriphidium transiliense	525.43	0.225879	556.6	15.1444	641.32	10.9641	717.34	1.00657	1.6655	12.2294
	Seriphidium transiliense	525.43	0.191742	556.6	14.8033	641.32	11.0077	717.34	1.30471	1.55193	11.257
	Seriphidium transiliense	525.43	0.186673	556.6	13.8148	641.32	10.4584	717.34	1.21948	1.49756	9.0554
	Seriphidium transiliense	530.6	0.144823	556.6	15.1769	641.32	11.1288	717.34	1.07966	1.51474	9.62851
	Seriphidium transiliense	525.43	0.188415	553.99	15.1527	641.32	10.2891	717.34	0.688462	1.92708	14.9374
	Seriphidium transiliense	530.6	0.165226	556.6	15.6883	641.32	11.2639	717.34	1.29203	1.71468	16.8376
	Seriphidium transiliense	522.84	0.234716	556.6	18.7745	641.32	13.3583	717.34	1.28531	2.19696	17.5613
	Seriphidium transiliense	522.84	0.180773	556.6	10.4587	641.32	6.73953	717.34	1.17707	1.45503	10.7639
	Seriphidium transiliense	525.43	0.244133	556.6	19.8185	641.32	13.9127	717.34	1.32207	2.31231	13.8831
	Seriphidium transiliense	525.43	0.217942	556.6	14.5921	641.32	10.831	717.34	0.885992	1.51419	13.4123
	Seriphidium transiliense	525.43	0.166773	556.6	11.7674	641.32	8.81049	717.34	0.712663	1.2122	10.7438
	Seriphidium transiliense	525.43	0.31774	556.6	16.2635	641.32	10.6342	717.34	1.05779	2.24436	14.4202
	Seriphidium transiliense	525.43	0.190453	556.6	10.0392	641.32	7.28518	717.34	0.842361	1.26661	9.33613
	Seriphidium transiliense	525.43	0.246466	556.6	14.2259	641.32	10.3356	717.34	1.19645	1.57477	12.3905
	Seriphidium transiliense	525.43	0.125016	556.6	7.64691	641.32	5.16177	717.34	0.82254	0.969401	9.70334
	Seriphidium transiliense	525.43	0.124537	556.6	7.34606	641.32	5.06571	717.34	0.921349	0.936206	9.93597
	Seriphidium transiliense	520.26	0.176282	556.6	13.0096	641.32	9.46013	717.34	1.11938	1.44657	10.4173
	Seriphidium transiliense	525.43	0.174567	556.6	12.6824	641.32	9.08612	717.34	1.10196	1.44202	9.95614
	Seriphidium transiliense	525.43	0.258597	556.6	13.5373	641.32	8.59126	717.34	1.24241	1.90952	13.3118
	Seriphidium transiliense	520.26	0.227167	556.6	15.3244	641.32	10.0918	722.84	0.572675	1.86873	16.695
	Seriphidium transiliense	525.43	0.142546	556.6	13.256	644.01	9.75111	722.84	0.423075	1.31462	10.9492
	Seriphidium transiliense	520.26	0.179319	556.6	15.9529	641.32	11.7483	722.84	0.210948	1.55319	12.7361
	Seriphidium transiliense	525.43	0.179425	556.6	13.3502	641.32	9.77623	722.84	0.495768	1.36868	12.0316
	Seriphidium transiliense	530.6	0.166772	556.6	13.3692	641.32	9.21272	722.84	0.185849	1.55195	12.1335
	Seriphidium transiliense	530.6	0.161281	559.22	11.4363	641.32	7.98497	722.84	0.294683	1.22746	10.455
	Seriphidium transiliense	525.43	0.0812085	556.6	7.95539	641.32	5.9492	722.84	1.00751	0.795972	6.73455
	Seriphidium transiliense	525.43	0.1253	553.99	10.8117	641.32	8.55523	722.84	0.223458	0.942398	7.93351
	Seriphidium transiliense	525.43	0.25444	559.22	16.197	641.32	11.6152	722.84	0.31553	1.6177	14
	Seriphidium transiliense	525.43	0.181407	556.6	16.1348	641.32	13.5249	722.84	1.27407	1.24548	10.3405
	Seriphidium transiliense	525.43	0.205183	556.6	17.1875	641.32	14.8594	722.84	0.206454	1.2099	7.99944
	Seriphidium transiliense	522.84	0.11919	559.22	11.1547	641.32	9.4019	722.84	1.06589	0.958196	7.02609
	Seriphidium transiliense	522.84	0.1838	556.6	17.0221	641.32	13.8566	722.84	1.18752	1.65292	10.2687
	Seriphidium transiliense	525.43	0.168627	559.22	14.8849	644.01	11.2166	722.84	0.55577	1.64105	9.8953
	Seriphidium transiliense	525.43	0.277298	559.22	18.7598	644.01	15.8694	722.84	1.09196	1.59533	10.7461
	Seriphidium transiliense	525.43	0.211609	556.6	13.3874	641.32	10.468	722.84	1.51703	1.19111	8.50768
	Seriphidium transiliense	525.43	0.206528	556.6	13.2103	641.32	10.2936	722.84	1.54992	1.27154	9.78247
	Seriphidium transiliense	525.43	0.230768	556.6	15.281	641.32	11.8858	722.84	1.35759	1.39195	10.9838
	Seriphidium transiliense	525.43	0.147099	559.22	13.7712	641.32	11.3298	722.84	1.33291	1.35062	9.71092
	Seriphidium transiliense	522.84	0.159728	556.6	14.1394	641.32	11.1159	722.84	0.967488	1.49211	10.9533
	Seriphidium transiliense	522.84	0.191248	551.39	14.9214	641.32	10.9778	722.84	0.847008	1.65106	14.0654
	Seriphidium transiliense	525.43	0.240462	556.6	13.7364	641.32	9.68342	722.84	0.98894	1.07421	14.0942
	Seriphidium transiliense	525.43	0.28431	556.6	17.0521	641.32	12.5738	722.84	0.932708	1.84463	12.4592
	Seriphidium transiliense	525.43	0.221228	559.22	19.3618	641.32	15.3456	722.84	0.984331	1.75016	13.1067
	Seriphidium transiliense	525.43	0.199653	556.6	12.7464	644.01	10.2813	722.84	1.0322	1.28691	10.6443
	Seriphidium transiliense	530.6	0.0908609	556.6	16.5378	641.32	13.5353	722.84	0.866964	1.36673	12.0827
	Seriphidium transiliense	522.84	0.189643	559.22	15.9451	641.32	12.193	722.84	0.70421	1.80559	10.793
	Seriphidium transiliense	525.43	0.199869	556.6	18.7372	641.32	14.542	722.84	0.933512	1.88819	10.5444
	Seriphidium transiliense	525.43	0.25498	551.39	14.5249	641.32	10.732	722.84	0.755232	1.57796	12.8162
	Seriphidium transiliense	525.43	0.230052	559.22	14.5103	641.32	10.23	722.84	0.320048	1.56971	15.8192
	Seriphidium transiliense	522.84	0.142626	556.6	12.6844	641.32	9.98467	722.84	1.20288	1.23556	9.15874
	Seriphidium transiliense	525.43	0.137379	556.6	13.0938	641.32	10.077	722.84	0.90726	1.24244	9.26626
	Seriphidium transiliense	525.43	0.189058	556.6	18.5454	641.32	15.8053	722.84	0.783169	1.32267	9.78897
	Seriphidium transiliense	525.43	0.195657	556.6	12.9642	641.32	9.37531	722.84	1.07574	1.32355	12.208
	Seriphidium transiliense	525.43	0.153528	556.6	11.9679	641.32	8.78938	722.84	1.18035	1.27978	10.4798
	Seriphidium transiliense	525.43	0.230143	556.6	18.2321	641.32	13.5645	722.84	1.26905	1.94995	13.0679
	Seriphidium transiliense	525.43	0.189413	556.6	12.1603	641.32	8.09135	722.84	1.36024	1.40893	12.6142
	Seriphidium transiliense	522.84	0.193409	556.6	13.9327	641.32	9.46079	722.84	1.16372	1.6105	15.3185
	Seriphidium transiliense	525.43	0.10229	556.6	8.68984	641.32	6.32956	722.84	1.31514	1.05412	8.58133
	Seriphidium transiliense	522.84	0.160462	556.6	11.0041	641.32	7.74084	722.84	0.843177	1.37443	10.2943
	Seriphidium transiliense	530.6	0.129433	556.6	9.32512	641.32	6.12801	722.84	0.830385	1.20188	8.36456
	Seriphidium transiliense	525.43	0.117167	551.39	7.61913	641.32	4.98513	722.84	0.748226	1.06954	8.04647
	Seriphidium transiliense	525.43	0.221906	556.6	11.2504	641.32	7.98676	722.84	1.28263	1.21877	11.7754
	Seriphidium transiliense	522.84	0.220371	556.6	16.7758	641.32	11.8882	722.84	1.14782	1.98981	14.2593
	Seriphidium transiliense	525.43	0.165248	556.6	12.8725	641.32	9.33398	722.84	1.42549	1.40329	11.4068
	Seriphidium transiliense	522.84	0.120973	556.6	9.21022	641.32	6.72942	722.84	1.67155	0.928007	9.10854
	Seriphidium transiliense	525.43	0.137571	556.6	12.3598	644.01	9.52759	722.84	0.989306	1.14287	9.50766
	Seriphidium transiliense	525.43	0.174544	556.6	12.9598	644.01	9.96688	722.84	1.21527	1.12826	9.32238
	Seriphidium transiliense	525.43	0.185958	556.6	12.435	641.32	9.25605	722.84	1.41552	1.14451	10.3213
	Seriphidium transiliense	525.43	0.215022	551.39	12.4384	641.32	9.1025	722.84	1.39989	1.45834	11.3274
	Seriphidium transiliense	525.43	0.300381	556.6	13.9078	641.32	9.75075	722.84	1.82292	1.6059	14.826
	Seriphidium transiliense	530.6	0.127276	556.6	12.0317	641.32	8.70248	722.84	1.64592	1.35941	11.2166
	Seriphidium transiliense	530.6	0.144435	556.6	9.33437	641.32	6.38002	722.84	1.27927	1.20631	10.2295
	Seriphidium transiliense	525.43	0.132672	556.6	10.7397	641.32	7.46865	722.84	1.57762	1.27674	9.64602
	Seriphidium transiliense	525.43	0.181713	556.6	11.0434	641.32	7.7446	722.84	1.43037	1.20474	11.7955
	Seriphidium transiliense	525.43	0.242655	556.6	14.22	641.32	9.90146	722.84	1.16333	1.60184	14.2981
	Seriphidium transiliense	525.43	0.230365	556.6	13.407	641.32	9.70884	722.84	1.48765	1.31551	11.5392
	Seriphidium transiliense	525.43	0.179085	556.6	11.7192	641.32	8.12872	722.84	1.19623	1.27463	11.2019
	Seriphidium transiliense	525.43	0.174626	556.6	11.1139	641.32	8.49567	722.84	1.41954	1.10174	9.19399
	Seriphidium transiliense	522.84	0.172372	556.6	13.2359	641.32	9.28481	722.84	1.78439	1.46719	10.0805
	Seriphidium transiliense	525.43	0.148722	556.6	11.7366	641.32	8.10428	722.84	1.37793	1.36907	9.34609
	Seriphidium transiliense	525.43	0.177428	556.6	10.8901	641.32	7.24959	722.84	1.73329	1.3689	10.329
	Seriphidium transiliense	525.43	0.224307	556.6	12.674	641.32	8.79497	722.84	1.74616	1.4271	11.2135
	Seriphidium transiliense	525.43	0.188296	548.78	12.6502	641.32	10.0756	722.84	1.84499	1.18693	8.98586
	Seriphidium transiliense	522.84	0.147904	556.6	9.32162	641.32	6.17983	722.84	1.23346	1.11581	13.318
	Seriphidium transiliense	522.84	0.144813	556.6	8.62612	641.32	5.52165	722.84	1.38957	1.17689	9.3301
	Seriphidium transiliense	525.43	0.141644	556.6	8.40695	641.32	5.32872	722.84	1.38358	1.17406	9.9289
	Seriphidium transiliense	525.43	0.220409	556.6	12.2643	641.32	8.94266	722.84	1.58883	1.35806	10.195
	Seriphidium transiliense	525.43	0.200865	556.6	12.3744	641.32	9.21297	722.84	1.4074	1.36545	9.88158
	Seriphidium transiliense	525.43	0.111053	559.22	6.91006	641.32	4.69637	722.84	1.24819	0.859409	9.36011
	Seriphidium transiliense	525.43	0.142923	556.6	9.10956	641.32	6.45356	722.84	1.37607	1.07504	10.5402
	Seriphidium transiliense	525.43	0.197054	551.39	10.7093	641.32	7.41751	722.84	1.20918	1.26239	12.4822
	Seriphidium transiliense	525.43	0.214189	556.6	9.69788	641.32	6.37047	722.84	1.38708	1.17128	14.5237
	Seriphidium transiliense	525.43	0.210211	556.6	11.4376	641.32	7.5971	722.84	0.881286	1.36843	13.1526
	Seriphidium transiliense	530.6	0.097756	556.6	13.5953	641.32	10.2222	722.84	1.49517	1.19042	10.9241
	Seriphidium transiliense	530.6	0.162401	556.6	9.08787	641.32	5.63667	722.84	1.43897	1.32604	9.59493
	Seriphidium transiliense	525.43	0.089127	556.6	7.2561	641.32	4.82568	722.84	1.42854	0.954634	8.32416
	Seriphidium transiliense	525.43	0.115678	556.6	10.6284	641.32	8.1588	722.84	1.4013	0.978764	9.78846
	Seriphidium transiliense	525.43	0.115256	556.6	10.5657	641.32	8.14463	722.84	1.2563	0.950801	10.525
	Seriphidium transiliense	525.43	0.183645	556.6	11.2671	641.32	7.80821	722.84	0.984091	1.30856	10.9794
	Seriphidium transiliense	525.43	0.194707	551.39	11.2341	641.32	7.7292	722.84	0.970621	1.35312	11.2069
	Seriphidium transiliense	525.43	0.250199	551.39	12.482	641.32	8.43946	722.84	1.09687	1.42686	14.4306
	Seriphidium transiliense	530.6	0.0906869	556.6	9.79892	641.32	6.29369	722.84	0.978526	1.16312	13.1271
	Seriphidium transiliense	525.43	0.165947	556.6	11.2464	641.32	7.32128	722.84	1.17588	1.55156	9.66907
	Seriphidium transiliense	525.43	0.153189	551.39	8.76576	641.32	5.66119	722.84	1.1323	1.27093	10.2962
	Seriphidium transiliense	525.43	0.261839	553.99	14.5227	641.32	10.0076	722.84	0.95697	1.6792	15.0927
	Seriphidium transiliense	530.6	0.124394	556.6	10.3022	641.32	6.29546	722.84	1.23968	1.4035	13.3243
	Seriphidium transiliense	525.43	0.123825	553.99	12.9193	641.32	9.69841	722.84	1.05028	1.32844	10.5499
	Seriphidium transiliense	525.43	0.173704	556.6	8.63304	644.01	5.49368	722.84	1.09036	1.071	11.1372
	Seriphidium transiliense	525.43	0.38327	556.6	20.6877	641.32	13.3933	722.84	1.11029	2.95399	18.5494
	Seriphidium transiliense	525.43	0.281137	556.6	19.9392	641.32	14.69	722.84	1.32941	2.20712	14.6327
	Seriphidium transiliense	525.43	0.152064	553.99	9.20874	641.32	6.6554	722.84	1.09329	0.89523	9.28182
	Seriphidium transiliense	522.84	0.181554	553.99	18.8666	641.32	14.4927	722.84	1.0716	1.74237	14.3522
	Seriphidium transiliense	522.84	0.311849	556.6	25.9954	641.32	21.217	722.84	1.28517	2.378	18.7337
	Seriphidium transiliense	525.43	0.108341	551.39	9.26294	641.32	6.85598	722.84	0.751446	0.964845	7.53884
	Seriphidium transiliense	525.43	0.352419	551.39	24.992	641.32	19.2753	722.84	1.30321	2.21854	17.3903
	Seriphidium transiliense	525.43	0.456919	551.39	28.8679	641.32	22.7096	722.84	0.835484	2.58296	20.5897
	Seriphidium transiliense	525.43	0.410657	559.22	22.1708	641.32	17.0194	722.84	0.690204	1.97749	18.9207
	Seriphidium transiliense	525.43	0.332383	551.39	19.8627	641.32	13.681	722.84	1.49785	2.49499	17.6352
	Seriphidium transiliense	525.43	0.326319	553.99	17.9565	641.32	13.932	722.84	1.16367	1.54959	15.9992
	Seriphidium transiliense	525.43	0.428071	553.99	23.3759	641.32	16.3641	722.84	0.789841	2.65361	23.0633
	Seriphidium transiliense	525.43	0.422942	553.99	22.7602	641.32	16.461	722.84	0.744093	2.49131	23.173
	Seriphidium transiliense	525.43	0.389837	556.6	21.31	641.32	15.8531	722.84	0.702685	2.12926	22.0413
	Seriphidium transiliense	525.43	0.305377	553.99	16.3435	641.32	12.0615	722.84	0.72675	1.62232	20.2531
	Seriphidium transiliense	525.43	0.311841	551.39	20.7327	641.32	16.117	722.84	1.48718	1.86702	15.3467
	Seriphidium transiliense	525.43	0.276508	556.6	18.2728	641.32	15.7551	722.84	1.10833	1.43201	14.1905
	Seriphidium transiliense	525.43	0.339806	553.99	18.6175	641.32	13.902	725.59	0.585617	1.93441	16.7759
	Seriphidium transiliense	525.43	0.252986	556.6	16.678	641.32	12.791	725.59	0.677651	1.5486	14.3117
	Seriphidium transiliense	525.43	0.286694	553.99	20.5469	641.32	15.3733	725.59	1.0757	2.14353	14.786
	Seriphidium transiliense	525.43	0.311849	551.39	25.8967	641.32	21.351	725.59	0.946714	2.28808	15.6852
	Seriphidium transiliense	525.43	0.284502	551.39	14.6675	641.32	10.5821	725.59	0.635956	1.57364	16.6351
	Seriphidium transiliense	525.43	0.367736	553.99	19.323	641.32	13.8727	728.34	0.76831	2.03148	20.453
	Seriphidium transiliense	525.43	0.415877	553.99	21.2248	641.32	14.1363	728.34	1.02149	2.88529	17.8374
	Seriphidium transiliense	525.43	0.147222	553.99	14.2511	641.32	12.103	728.34	1.52097	1.27164	9.61622
	Seriphidium transiliense	525.43	0.231371	559.22	17.0772	641.32	12.7454	728.34	1.15499	1.87072	13.4353
	Seriphidium transiliense	525.43	0.235621	551.39	13.5605	641.32	10.1965	728.34	0.899952	1.40113	12.0903
	Seriphidium transiliense	525.43	0.307087	556.6	17.1682	641.32	12.715	728.34	1.64239	1.7963	15.0664
	Seriphidium transiliense	525.43	0.250442	553.99	15.1724	641.32	11.7927	728.34	1.18629	1.72358	12.3704
	Seriphidium transiliense	530.6	0.0914173	556.6	17.4282	644.01	14.236	728.34	0.588484	1.63186	11.9913
	Seriphidium transiliense	525.43	0.141919	559.22	15.9003	641.32	12.5041	728.34	0.774976	1.43911	10.801
	Seriphidium transiliense	530.6	0.168609	556.6	16.0364	641.32	11.2882	728.34	1.3409	1.84556	14.6623
	Seriphidium transiliense	530.6	0.177524	556.6	15.0412	641.32	11.6674	728.34	0.851758	1.25642	9.23902
	Seriphidium transiliense	530.6	0.287302	556.6	19.01	641.32	13.7829	728.34	0.894492	2.08451	13.3327
	Seriphidium transiliense	522.84	0.197651	556.6	17.4488	644.01	12.7222	728.34	1.07095	1.89398	11.9347
	Seriphidium transiliense	530.6	0.134146	556.6	10.2441	644.01	7.26678	728.34	0.77752	1.19091	10.4574
	Seriphidium transiliense	530.6	0.190881	556.6	14.1043	641.32	10.8498	728.34	0.468911	1.51953	10.7501
	Seriphidium transiliense	530.6	0.227857	556.6	14.8898	641.32	11.1254	728.34	1.01485	1.58533	10.8726
	Seriphidium transiliense	525.43	0.169702	553.99	16.2193	644.01	11.2709	728.34	0.996181	1.93454	13.6322
	Seriphidium transiliense	530.6	0.197119	556.6	17.6331	641.32	13.5349	728.34	0.785833	1.82247	14.1165
	Seriphidium transiliense	530.6	0.247577	556.6	16.4666	641.32	12.3656	728.34	0.664966	1.76083	12.0487
	Seriphidium transiliense	530.6	0.171395	556.6	14.112	641.32	11.028	728.34	0.799833	1.43961	11.713
	Seriphidium transiliense	530.6	0.163292	559.22	13.6216	641.32	10.368	728.34	1.88789	1.48659	10.7952
	Seriphidium transiliense	530.6	0.20744	556.6	14.9648	641.32	11.3474	728.34	1.07062	1.83491	10.2775
	Seriphidium transiliense	525.43	0.137236	559.22	15.9451	641.32	12.193	728.34	1.29598	1.80559	10.793
	Seriphidium transiliense	525.43	0.281565	551.39	21.3742	641.32	16.0971	728.34	1.01638	2.2417	18.21
	Seriphidium transiliense	525.43	0.237104	559.22	12.7666	641.32	8.93405	728.34	0.866464	1.59207	13.2618
	Seriphidium transiliense	525.43	0.402325	559.22	21.6228	641.32	16.1864	728.34	0.854214	2.28616	18.246
	Seriphidium transiliense	525.43	0.248288	553.99	15.5536	641.32	12.9535	728.34	0.564381	1.51609	11.1021
	Seriphidium transiliense	525.43	0.223944	559.22	14.0946	641.32	10.6442	728.34	0.778329	1.58563	12.9751
	Seriphidium transiliense	525.43	0.319585	559.22	21.0721	641.32	16.9175	728.34	0.898099	1.82017	18.8004
	Seriphidium transiliense	525.43	0.383871	553.99	23.9077	641.32	19.824	728.34	0.87871	2.06762	19.4226
	Seriphidium transiliense	525.43	0.369304	556.6	21.8717	641.32	16.01	728.34	0.79846	2.37254	20.7605
	Seriphidium transiliense	525.43	0.373524	559.22	23.7945	641.32	18.1649	728.34	0.685181	2.55058	19.6324
	Seriphidium transiliense	525.43	0.34422	559.22	23.4606	641.32	16.5685	728.34	0.813994	2.80484	23.605
	Seriphidium transiliense	525.43	0.353181	559.22	20.8838	641.32	13.7682	728.34	1.52618	2.70209	25.0821
	Seriphidium transiliense	525.43	0.313069	553.99	18.3496	641.32	13.6711	728.34	1.15708	2.02194	20.0995
	Seriphidium transiliense	525.43	0.382526	556.6	22.6279	641.32	17.7708	728.34	0.832897	2.36742	20.8431
	Seriphidium transiliense	522.84	0.19479	559.22	15.1354	641.32	10.7995	728.34	1.07448	1.68209	20.327
	Seriphidium transiliense	525.43	0.310883	559.22	21.3466	641.32	14.5862	728.34	1.05092	2.75766	20.8716
	Seriphidium transiliense	525.43	0.307373	553.99	18.1846	641.32	11.7431	728.34	0.847393	2.5642	19.9075
	Seriphidium transiliense	525.43	0.313863	556.6	15.7094	641.32	10.7776	728.34	0.486659	2.09756	18.5347
	Seriphidium transiliense	525.43	0.331837	559.22	16.601	641.32	11.5795	728.34	0.575016	2.10964	16.9323
	Seriphidium transiliense	525.43	0.315425	559.22	20.6233	641.32	15.4464	728.34	0.854772	2.12469	20.9708
	Seriphidium transiliense	525.43	0.303964	553.99	25.2163	641.32	19.6407	728.34	0.437841	2.29668	20.7008
	Seriphidium transiliense	525.43	0.227569	553.99	12.7136	641.32	9.49895	728.34	1.00627	1.23346	12.6997
	Seriphidium transiliense	525.43	0.295484	556.6	17.3953	641.32	13.3662	728.34	0.656794	1.62961	13.8952
	Seriphidium transiliense	525.43	0.487063	559.22	27.604	641.32	20.9425	728.34	0.946667	3.18147	25.8637
	Seriphidium transiliense	525.43	0.493129	556.6	26.6899	641.32	19.61	728.34	1.04315	3.03572	25.0683
	Seriphidium transiliense	525.43	0.418681	559.22	22.882	641.32	16.9551	728.34	0.405528	2.64142	24.7428
	Seriphidium transiliense	525.43	0.523544	556.6	25.7204	641.32	18.269	728.34	0.833534	3.02304	25.5398
	Seriphidium transiliense	525.43	0.377907	559.22	23.1863	641.32	17.6124	728.34	1.13326	2.38188	21.2129
	Seriphidium transiliense	525.43	0.406728	559.22	21.1197	641.32	15.6583	728.34	0.649919	2.23366	21.3466
	Seriphidium transiliense	525.43	0.397829	556.6	21.5877	641.32	16.1031	728.34	0.745623	2.318	23.694
	Seriphidium transiliense	525.43	0.395776	553.99	22.2764	641.32	16.4495	728.34	1.1406	2.45975	23.0551
	Seriphidium transiliense	525.43	0.362435	559.22	19.8743	641.32	14.0878	728.34	1.1226	2.31049	23.8456
	Seriphidium transiliense	525.43	0.330069	559.22	16.3135	641.32	11.5727	728.34	0.543218	2.02837	19.4665
	Seriphidium transiliense	525.43	0.271883	556.6	15.012	641.32	11.3801	728.34	0.596512	1.65087	16.9893
	Seriphidium transiliense	525.43	0.323133	559.22	17.5121	641.32	12.7722	728.34	0.784891	2.08625	16.9028
	Seriphidium transiliense	525.43	0.283796	559.22	21.1193	641.32	16.5361	728.34	0.949091	2.15362	14.6457
	Seriphidium transiliense	525.43	0.302252	559.22	16.6908	641.32	11.6977	728.34	1.06454	2.08749	18.0484
	Seriphidium transiliense	525.43	0.415262	559.22	22.308	641.32	16.6952	728.34	0.931581	2.45065	22.1557
	Seriphidium transiliense	525.43	0.458768	556.6	23.2877	641.32	16.9331	728.34	1.26546	2.73305	22.776
	Seriphidium transiliense	525.43	0.37146	559.22	18.8625	641.32	12.3651	728.34	0.598262	2.77888	24.5048
	Seriphidium transiliense	525.43	0.350964	559.22	16.1694	641.32	10.6154	728.34	0.737859	2.27514	21.2462
	Seriphidium transiliense	525.43	0.423609	553.99	20.9869	641.32	14.7988	728.34	0.820948	2.68726	21.0905
	Seriphidium transiliense	522.84	0.21854	553.99	19.2738	641.32	14.6653	728.34	0.288702	2.08093	18.6694
	Seriphidium transiliense	525.43	0.235194	556.6	15.435	641.32	10.7596	728.34	0.956276	2.02937	19.7944
	Seriphidium transiliense	525.43	0.225401	559.22	13.7912	641.32	9.70796	728.34	0.958728	1.72951	19.5606
	Seriphidium transiliense	525.43	0.272429	553.99	12.7376	641.32	8.30852	728.34	0.709494	1.5842	17.7729
	Seriphidium transiliense	525.43	0.231756	553.99	21.2164	641.32	17.6006	728.34	0.931089	1.75246	13.6367
	Seriphidium transiliense	525.43	0.252961	551.39	13.1347	641.32	9.01148	728.34	0.606343	1.50454	17.0027
	Seriphidium transiliense	525.43	0.359772	551.39	19.4071	641.32	14.1668	728.34	0.655222	1.96124	19.9091
	Seriphidium transiliense	525.43	0.299087	551.39	15.8662	641.32	12.0228	728.34	0.31151	1.59368	15.7996
	Seriphidium transiliense	525.43	0.360641	551.39	23.7251	641.32	17.8141	728.34	0.756933	2.4747	21.5697
	Seriphidium transiliense	525.43	0.33781	553.99	22.7169	641.32	17.1484	728.34	1.06945	2.22426	22.3643
	Seriphidium transiliense	525.43	0.311593	553.99	19.0866	641.32	14.7141	728.34	0.991179	1.87295	14.2271
	Seriphidium transiliense	525.43	0.367296	559.22	21.3328	641.32	16.1467	728.34	0.730472	2.15204	19.0506
	Seriphidium transiliense	525.43	0.454069	559.22	26.0256	641.32	20.0511	728.34	0.919254	2.72891	22.9242
	Seriphidium transiliense	525.43	0.405034	553.99	22.3404	641.32	16.7222	728.34	0.681345	2.47264	22.5182
	Seriphidium transiliense	525.43	0.464054	553.99	26.6319	641.32	18.2861	728.34	0.987909	3.4592	27.5284
	Seriphidium transiliense	525.43	0.415845	559.22	25.6216	641.32	18.4624	728.34	0.55076	2.85871	23.3246
	Seriphidium transiliense	525.43	0.355171	556.6	24.0983	641.32	19.1372	728.34	0.578012	2.55004	19.5691
	Seriphidium transiliense	520.26	0.241774	553.99	25.0482	641.32	19.0608	728.34	0.997964	2.65321	21.2249
	Seriphidium transiliense	525.43	0.231399	551.39	21.4737	641.32	16.9781	728.34	0.72973	2.1426	19.1741
	Seriphidium transiliense	525.43	0.376494	559.22	21.0158	641.32	15.929	728.34	0.712659	1.83584	17.6395
	Seriphidium transiliense	525.43	0.368079	553.99	27.1432	641.32	20.825	728.34	0.394615	2.80541	23.7122
	Seriphidium transiliense	525.43	0.302679	553.99	17.6509	641.32	13.3188	728.34	0.769427	1.94898	17.9215
	Seriphidium transiliense	525.43	0.430327	556.6	22.9225	641.32	16.4848	728.34	0.833137	2.65644	20.9346
	Seriphidium transiliense	525.43	0.42727	559.22	25.5577	641.32	17.0178	728.34	0.684962	3.71069	26.3731
	Seriphidium transiliense	525.43	0.295345	553.99	19.6534	641.32	14.0555	728.34	0.764847	2.29933	22.4358
	Seriphidium transiliense	525.43	0.483425	553.99	23.8683	641.32	16.1853	728.34	0.67195	2.97994	25.8733
	Seriphidium transiliense	525.43	0.500669	553.99	25.0874	641.32	16.9886	728.34	0.436756	3.10712	26.3348
	Seriphidium transiliense	525.43	0.479994	551.39	31.1544	641.32	23.3027	728.34	0.87555	3.25698	25.6244
	Seriphidium transiliense	525.43	0.365905	553.99	19.8757	641.32	14.9083	728.34	0.816593	1.77926	17.6286
	Seriphidium transiliense	525.43	0.404012	551.39	22.4662	641.32	16.1396	728.34	1.05033	2.53614	20.3628
	Seriphidium transiliense	525.43	0.387859	553.99	24.5719	641.32	19.2568	728.34	0.945129	2.31309	22.1178
	Seriphidium transiliense	525.43	0.427151	553.99	27.4257	641.32	20.8864	728.34	0.947379	2.71902	22.1542
	Seriphidium transiliense	525.43	0.340071	553.99	23.7294	641.32	18.9737	728.34	1.02108	2.35745	19.9124
	Seriphidium transiliense	525.43	0.332877	551.39	21.4026	641.32	17.026	728.34	0.81996	2.08963	18.5796
	Seriphidium transiliense	525.43	0.435875	551.39	27.9296	641.32	22.0561	728.34	0.39051	2.73269	20.4389
	Seriphidium transiliense	525.43	0.394603	551.39	23.9669	641.32	19.3571	728.34	0.994615	2.23219	19.4711
	Seriphidium transiliense	525.43	0.355357	551.39	21.8317	641.32	18.3385	728.34	0.382224	1.78922	20.0749
	Seriphidium transiliense	525.43	0.292	553.99	18.0761	641.32	13.8739	728.34	0.318508	1.59595	15.1309
	Seriphidium transiliense	525.43	0.533327	551.39	30.9282	641.32	23.6062	728.34	0.742103	3.38709	21.9191
	Seriphidium transiliense	525.43	0.411494	553.99	29.1882	641.32	22.7307	728.34	0.645327	3.09615	20.6806
	Seriphidium transiliense	525.43	0.325288	559.22	24.0501	641.32	19.0944	728.34	0.559405	2.30772	19.9441
	Seriphidium transiliense	525.43	0.303151	559.22	27.3833	641.32	23.4041	728.34	0.435234	2.22894	19.0922
	Seriphidium transiliense	525.43	0.2993	551.39	16.8201	641.32	12.2997	728.34	0.835925	1.76723	17.3911
	Seriphidium transiliense	525.43	0.230867	551.39	14.3254	641.32	10.6443	728.34	0.717698	1.48151	16.2556
	Seriphidium transiliense	525.43	0.464232	553.99	25.8937	641.32	19.1327	728.34	1.20684	3.15586	18.799
	Seriphidium transiliense	525.43	0.372976	559.22	22.7332	641.32	17.313	728.34	1.12138	2.39133	17.6908
	Seriphidium transiliense	525.43	0.313466	551.39	16.1723	641.32	11.6115	728.34	0.667355	1.84994	17.5211
	Seriphidium transiliense	525.43	0.347056	556.6	21.3533	641.32	17.2173	728.34	1.02047	1.79231	15.7366
	Seriphidium transiliense	525.43	0.287617	553.99	15.079	641.32	10.3797	728.34	1.04358	1.86339	18.5514
	Seriphidium transiliense	525.43	0.230595	559.22	14.8317	641.32	11.1991	728.34	1.29299	1.49014	16.5938
	Seriphidium transiliense	525.43	0.240683	553.99	16.2714	641.32	11.8675	728.34	0.892073	1.9734	16.4251
	Seriphidium transiliense	525.43	0.337889	556.6	17.2591	641.32	11.6444	728.34	1.19424	2.15558	21.1136
	Seriphidium transiliense	525.43	0.324524	559.22	18.4953	641.32	13.8294	728.34	0.968448	2.05633	18.9259
	Seriphidium transiliense	525.43	0.294695	551.39	13.9063	641.32	9.5909	728.34	0.879079	1.90074	16.6993
	Seriphidium transiliense	525.43	0.279099	551.39	16.0968	641.32	12.1603	728.34	1.03497	2.16635	16.0801
	Seriphidium transiliense	525.43	0.322613	556.6	18.9319	641.32	12.836	731.1	0.917425	2.55047	17.7554
	Seriphidium transiliense	525.43	0.340444	556.6	20.1426	641.32	14.0945	733.86	1.00924	2.61126	17.6219
	Seriphidium transiliense	525.43	0.40349	553.99	24.4389	641.32	17.4188	733.86	1.18769	3.01475	21.1037
	Seriphidium transiliense	525.43	0.43956	559.22	24.854	641.32	18.802	736.62	0.665583	2.77521	23.8041
	Seriphidium transiliense	525.43	0.32748	559.22	20.9612	641.32	15.5563	742.14	1.25736	2.3945	17.372
	Seriphidium transiliense	525.43	0.369012	553.99	19.61	641.32	14.8105	744.91	-0.0154355	2.16421	17.2731
	Seriphidium transiliense	525.43	0.388655	551.39	19.3979	641.32	12.8785	744.91	0.292746	2.69902	19.4346
	Seriphidium transiliense	525.43	0.405417	551.39	23.3861	641.32	17.5362	744.91	0.503012	2.29559	21.6001
	Seriphidium transiliense	525.43	0.397141	559.22	22.4719	641.32	16.8859	744.91	0.341897	2.14183	20.0453
	Seriphidium transiliense	525.43	0.298109	551.39	18.1801	641.32	13.3019	744.91	0.909563	2.19564	19.1701
	Seriphidium transiliense	522.84	0.26904	556.6	19.2741	641.32	13.7752	744.91	0.96723	2.37697	20.3883
	Seriphidium transiliense	522.84	0.26075	553.99	16.9697	641.32	11.8129	744.91	0.956599	2.0464	20.8098
	Seriphidium transiliense	525.43	0.320841	559.22	23.502	641.32	16.4577	744.91	0.91225	2.6588	23.7498
	Seriphidium transiliense	525.43	0.287093	559.22	16.4729	641.32	12.819	744.91	0.700065	1.75382	13.3216
	Seriphidium transiliense	525.43	0.404722	559.22	26.015	641.32	21.4908	744.91	0.690871	2.55499	20.7797
	Seriphidium transiliense	525.43	0.322063	551.39	16.8504	641.32	12.7387	744.91	1.26405	1.93579	14.7724
	Seriphidium transiliense	525.43	0.316544	551.39	20.5784	641.32	15.7646	744.91	0.969333	2.17508	17.3605
	Seriphidium transiliense	525.43	0.267442	551.39	17.4143	641.32	14.0389	744.91	1.38168	1.67818	12.5117
	Seriphidium transiliense	525.43	0.416929	559.22	26.2387	641.32	20.8695	744.91	1.09992	2.49935	21.0806
	Seriphidium transiliense	525.43	0.348433	559.22	20.1115	641.32	16.5392	744.91	1.2834	2.00604	17.2721
	Seriphidium transiliense	525.43	0.387758	553.99	23.6022	641.32	19.4765	744.91	0.860952	2.14636	16.9057
	Seriphidium transiliense	525.43	0.257839	559.22	18.993	641.32	16.9999	744.91	1.49683	1.74323	13.2434
	Seriphidium transiliense	525.43	0.220935	551.39	18.537	641.32	15.712	744.91	1.36151	1.55621	13.5541
	Seriphidium transiliense	525.43	0.326173	559.22	19.5389	641.32	15.8362	744.91	1.36566	1.83621	15.7525
	Seriphidium transiliense	525.43	0.209151	553.99	21.14	641.32	18.2767	744.91	1.12264	1.71129	11.4855
	Seriphidium transiliense	525.43	0.366714	559.22	22.4216	641.32	16.8931	744.91	1.09855	2.49038	19.0997
	Seriphidium transiliense	525.43	0.201585	559.22	22.146	641.32	19.8079	744.91	1.29771	1.719	12.3427
	Seriphidium transiliense	525.43	0.38625	553.99	24.4801	641.32	18.0359	744.91	0.216933	2.622	23.439
	Seriphidium transiliense	525.43	0.375528	559.22	20.8043	641.32	15.8027	744.91	0.559474	2.10147	19.055
	Ceratocarpus arenarius	517.68	0.212226	551.39	14.9378	641.32	19.0297	703.64	0.828409	2.77751	17.8724
	Ceratocarpus arenarius	520.26	0.14128	551.39	17.0749	641.32	13.4069	706.37	0.835815	2.27876	15.4464
	Ceratocarpus arenarius	520.26	0.0762258	551.39	14.5416	641.32	12.6947	706.37	0.464145	2.38316	15.1271
	Ceratocarpus arenarius	520.26	0.108332	551.39	15.6588	641.32	11.7146	706.37	0.766696	2.61163	16.2636
	Ceratocarpus arenarius	520.26	0.194358	551.39	16.9583	641.32	17.75	709.11	1.2169	1.67921	12.8575
	Ceratocarpus arenarius	520.26	0.104889	551.39	15.3179	641.32	12.4515	709.11	0.597077	2.73526	16.0251
	Ceratocarpus arenarius	520.26	0.15472	551.39	23.9542	641.32	16.7242	709.11	0.518782	1.67839	12.6141
	Ceratocarpus arenarius	520.26	0.196917	551.39	27.681	641.32	9.32361	709.11	0.796173	3.3115	17.7
	Ceratocarpus arenarius	520.26	0.192889	551.39	22.7546	641.32	14.7835	709.11	0.406845	2.44462	16.1842
	Ceratocarpus arenarius	520.26	0.20806	551.39	18.4747	641.32	9.03484	709.11	0.485887	1.60231	13.2761
	Ceratocarpus arenarius	520.26	0.217492	551.39	21.3688	641.32	9.43481	709.11	0.610657	2.86381	19.7694
	Ceratocarpus arenarius	520.26	0.263845	551.39	23.0397	641.32	13.7381	709.11	0.882913	1.42829	13.7141
	Ceratocarpus arenarius	520.26	0.181252	551.39	15.8774	641.32	13.1628	714.59	1.00701	1.45294	13.501
	Ceratocarpus arenarius	520.26	0.401776	551.39	24.6891	641.32	8.09326	714.59	0.961938	1.76316	10.9447
	Ceratocarpus arenarius	520.26	0.143248	551.39	25.48	641.32	12.3836	714.59	0.933496	4.84839	26.9622
	Ceratocarpus arenarius	520.26	0.228877	551.39	26.4731	641.32	15.5609	714.59	0.755962	2.74904	20.9206
	Ceratocarpus arenarius	520.26	0.195853	551.39	25.3588	641.32	13.2886	714.59	0.837665	1.63567	13.015
	Ceratocarpus arenarius	520.26	0.189893	551.39	29.6672	641.32	9.26397	714.59	0.864593	1.69093	15.4187
	Ceratocarpus arenarius	520.26	0.298175	551.39	30.8443	641.32	7.81809	717.34	1.05849	3.00626	20.8513
	Ceratocarpus arenarius	520.26	0.207603	551.39	17.9884	641.32	16.8215	717.34	1.18239	0.837559	11.7419
	Ceratocarpus arenarius	520.26	0.283619	551.39	25.7237	641.32	15.3075	717.34	1.12214	1.92195	19.936
	Ceratocarpus arenarius	522.84	0.261829	551.39	23.5345	641.32	11.3528	717.34	0.966141	1.99685	16.5551
	Ceratocarpus arenarius	522.84	0.229506	551.39	26.6921	641.32	13.1369	717.34	0.987139	2.0508	12.9243
	Ceratocarpus arenarius	522.84	0.229532	551.39	24.716	641.32	13.4471	717.34	1.08947	2.34414	13.0177
	Ceratocarpus arenarius	522.84	0.269532	551.39	27.6686	641.32	12.5194	717.34	1.1879	1.46047	10.8517
	Ceratocarpus arenarius	522.84	0.167567	551.39	28.3149	641.32	9.68423	717.34	0.915194	1.338	8.84792
	Ceratocarpus arenarius	522.84	0.221843	551.39	20.06	641.32	10.8344	717.34	1.0099	2.63968	14.3541
	Ceratocarpus arenarius	522.84	0.17656	551.39	27.4276	641.32	13.6079	717.34	0.997329	2.75977	16.3759
	Ceratocarpus arenarius	522.84	0.210601	551.39	19.1641	641.32	12.6068	720.09	1.40935	2.6746	14.3487
	Ceratocarpus arenarius	522.84	0.147645	551.39	30.6601	641.32	10.8859	722.84	0.919355	1.6464	10.3659
	Ceratocarpus arenarius	522.84	0.16229	551.39	27.2391	641.32	11.6947	722.84	0.16669	2.05367	12.6982
	Ceratocarpus arenarius	522.84	0.16802	551.39	25.614	641.32	12.8821	722.84	0.351234	1.88738	11.4512
	Ceratocarpus arenarius	522.84	0.329544	551.39	27.3057	641.32	15.9073	722.84	0.569833	2.24975	14.2326
	Ceratocarpus arenarius	522.84	0.184016	551.39	22.8211	641.32	8.45949	722.84	0.180125	1.38629	10.368
	Ceratocarpus arenarius	522.84	0.208929	551.39	29.0138	641.32	10.3257	722.84	-0.0128589	1.63674	10.4947
	Ceratocarpus arenarius	522.84	0.199758	551.39	18.9737	641.32	11.2393	722.84	0.572226	2.01049	12.387
	Ceratocarpus arenarius	522.84	0.227968	551.39	38.0524	641.32	12.1733	722.84	0.140897	1.46751	9.50628
	Ceratocarpus arenarius	522.84	0.150042	551.39	23.3738	641.32	11.9264	722.84	1.30311	1.72119	12.4923
	Ceratocarpus arenarius	522.84	0.251032	551.39	19.1072	641.32	10.9314	722.84	0.0133508	2.02261	13.7663
	Ceratocarpus arenarius	522.84	0.13944	551.39	17.0479	641.32	12.4512	722.84	0.724567	1.91609	13.7054
	Ceratocarpus arenarius	522.84	0.182827	551.39	22.0248	641.32	11.8294	722.84	0.408071	2.41578	16.5064
	Ceratocarpus arenarius	522.84	0.142085	551.39	18.4153	641.32	19.0504	722.84	0.969244	1.33453	12.3652
	Ceratocarpus arenarius	522.84	0.132793	551.39	24.2365	641.32	13.9207	722.84	1.35388	1.9762	12.3231
	Ceratocarpus arenarius	522.84	0.198887	551.39	24.7874	641.32	11.2798	722.84	1.31989	1.71055	10.9318
	Ceratocarpus arenarius	522.84	0.206873	551.39	19.1754	641.32	23.0063	722.84	1.30049	2.05623	12.7121
	Ceratocarpus arenarius	522.84	0.233423	551.39	20.3316	641.32	16.6683	722.84	1.38123	1.98953	12.2861
	Ceratocarpus arenarius	522.84	0.497772	551.39	19.7201	641.32	12.622	722.84	1.10087	1.56466	12.85
	Ceratocarpus arenarius	522.84	0.287067	551.39	18.9184	641.32	11.61	722.84	0.920308	1.8167	12.4232
	Ceratocarpus arenarius	522.84	0.33578	551.39	24.7734	641.32	11.9223	722.84	1.1395	1.34605	8.53252
	Ceratocarpus arenarius	522.84	0.399018	551.39	22.3487	641.32	15.7461	722.84	1.33991	1.72921	14.2957
	Ceratocarpus arenarius	522.84	0.263516	551.39	25.5612	641.32	15.6273	722.84	1.36303	2.33404	12.2839
	Ceratocarpus arenarius	525.43	0.341736	551.39	22.2098	641.32	16.5237	722.84	0.973734	1.44598	6.84198
	Ceratocarpus arenarius	525.43	0.247373	551.39	22.6434	641.32	9.40513	722.84	0.830216	1.37961	6.8462
	Ceratocarpus arenarius	525.43	0.191661	551.39	20.2227	641.32	14.781	722.84	0.863946	1.42447	7.50997
	Ceratocarpus arenarius	525.43	0.24076	551.39	24.1626	641.32	11.2695	722.84	0.965647	1.62734	10.1439
	Ceratocarpus arenarius	525.43	0.157514	551.39	23.1514	641.32	11.5055	722.84	1.0903	1.73057	9.77812
	Ceratocarpus arenarius	525.43	0.27769	551.39	29.9024	641.32	9.30578	722.84	0.713395	2.16952	8.44827
	Ceratocarpus arenarius	525.43	0.168073	553.99	16.3109	641.32	15.4888	722.84	1.21496	1.33093	14.877
	Ceratocarpus arenarius	525.43	0.270361	553.99	22.5572	641.32	17.8608	722.84	1.25508	1.82456	15.7979
	Ceratocarpus arenarius	525.43	0.347671	553.99	17.0028	641.32	13.2436	722.84	1.22456	1.78788	12.6577
	Ceratocarpus arenarius	525.43	0.195331	553.99	12.2534	641.32	14.2639	722.84	1.51744	1.64626	13.0587
	Ceratocarpus arenarius	525.43	0.241585	553.99	15.136	641.32	10.4734	722.84	0.68803	1.4099	10.6222
	Ceratocarpus arenarius	525.43	0.158692	553.99	11.3566	641.32	8.90657	722.84	1.60322	1.37574	6.98078
	Ceratocarpus arenarius	525.43	0.254964	553.99	15.408	641.32	10.1619	722.84	1.44527	2.60719	19.6244
	Ceratocarpus arenarius	525.43	0.201823	553.99	14.9742	641.32	10.5813	722.84	1.14966	1.62326	8.69725
	Ceratocarpus arenarius	525.43	0.319397	553.99	13.0791	641.32	9.52038	722.84	0.851018	1.42811	7.92587
	Ceratocarpus arenarius	525.43	0.265599	553.99	14.2672	641.32	14.0963	722.84	1.20725	1.45811	8.95725
	Ceratocarpus arenarius	525.43	0.219369	553.99	14.5809	641.32	10.0012	722.84	0.961411	1.23332	9.52796
	Ceratocarpus arenarius	525.43	0.253478	553.99	19.1439	641.32	10.0836	722.84	1.33516	2.58999	11.7968
	Ceratocarpus arenarius	525.43	0.20055	553.99	19.7913	641.32	10.2534	722.84	1.3767	1.45691	13.5383
	Ceratocarpus arenarius	525.43	0.202135	553.99	17.2442	641.32	11.6586	722.84	1.38297	1.76317	12.836
	Ceratocarpus arenarius	525.43	0.139768	553.99	12.5909	641.32	9.38054	722.84	1.12237	1.6067	10.3447
	Ceratocarpus arenarius	525.43	0.302605	553.99	14.6627	641.32	9.41233	722.84	0.863123	1.18433	7.70077
	Ceratocarpus arenarius	525.43	0.280907	553.99	21.0501	641.32	10.1014	722.84	1.02805	1.79209	11.7779
	Ceratocarpus arenarius	525.43	0.235819	553.99	24.8897	641.32	10.6203	722.84	1.40836	0.863196	10.9898
	Ceratocarpus arenarius	525.43	0.221085	553.99	24.1437	641.32	9.62089	722.84	0.952722	2.18088	15.3663
	Ceratocarpus arenarius	525.43	0.20577	553.99	21.9462	641.32	11.2244	722.84	0.687778	2.1068	12.1209
	Ceratocarpus arenarius	525.43	0.163065	553.99	23.3241	641.32	8.18854	722.84	0.926879	1.96313	10.5385
	Ceratocarpus arenarius	525.43	0.159823	553.99	24.1737	641.32	8.28016	722.84	1.11233	1.52524	8.51776
	Ceratocarpus arenarius	525.43	0.310694	553.99	28.3048	641.32	10.236	722.84	1.37746	1.36413	9.17529
	Ceratocarpus arenarius	525.43	0.275181	553.99	29.4555	641.32	9.17165	722.84	1.30232	1.60101	12.6719
	Ceratocarpus arenarius	525.43	0.271921	553.99	34.7069	641.32	10.3224	722.84	0.965018	1.49789	8.23824
	Ceratocarpus arenarius	525.43	0.107517	553.99	27.2021	641.32	9.17474	722.84	1.63133	1.27301	8.79974
	Ceratocarpus arenarius	525.43	0.133298	553.99	31.9595	641.32	11.7495	722.84	1.6026	2.42507	17.5733
	Ceratocarpus arenarius	525.43	0.194808	553.99	21.9734	641.32	12.6447	722.84	0.98452	1.32519	9.35602
	Ceratocarpus arenarius	525.43	0.145093	553.99	24.6119	641.32	8.21421	722.84	1.62501	1.23932	8.05456
	Ceratocarpus arenarius	525.43	0.236778	553.99	20.9518	641.32	11.7987	722.84	1.35464	1.31847	7.4793
	Ceratocarpus arenarius	525.43	0.138032	553.99	21.5694	641.32	11.1645	722.84	0.992085	1.33965	10.562
	Ceratocarpus arenarius	525.43	0.182167	553.99	22.7874	641.32	14.0766	722.84	1.03051	2.02983	12.8653
	Ceratocarpus arenarius	525.43	0.174431	553.99	21.516	641.32	13.2149	722.84	1.56652	1.60823	9.29721
	Ceratocarpus arenarius	525.43	0.172308	553.99	22.5386	641.32	8.29494	722.84	1.78612	1.22114	7.99718
	Ceratocarpus arenarius	525.43	0.173441	553.99	19.9302	641.32	10.8761	722.84	2.02093	1.24144	9.91071
	Ceratocarpus arenarius	525.43	0.222696	556.6	18.5491	641.32	12.5135	722.84	1.47534	1.25057	10.3396
	Ceratocarpus arenarius	525.43	0.210651	556.6	22.599	641.32	13.9972	722.84	2.02991	1.41312	10.1671
	Ceratocarpus arenarius	525.43	0.15551	556.6	23.295	641.32	12.6533	722.84	1.95331	1.10987	9.14302
	Ceratocarpus arenarius	525.43	0.225022	556.6	27.6322	641.32	15.0373	722.84	1.55545	1.06791	9.43983
	Ceratocarpus arenarius	525.43	0.17003	556.6	23.3432	641.32	9.50864	722.84	1.90008	1.37267	12.4276
	Ceratocarpus arenarius	525.43	0.154024	556.6	13.6956	641.32	12.483	722.84	1.54468	1.56757	13.2808
	Ceratocarpus arenarius	525.43	0.109494	556.6	24.7551	641.32	9.78452	722.84	1.59251	1.14616	9.26278
	Ceratocarpus arenarius	525.43	0.16345	556.6	16.237	641.32	17.6117	722.84	1.66915	1.29022	11.2276
	Ceratocarpus arenarius	525.43	0.239534	556.6	13.2932	641.32	11.317	722.84	2.11957	1.30172	10.767
	Ceratocarpus arenarius	525.43	0.271968	556.6	17.8287	641.32	10.1464	722.84	2.00314	1.43937	11.6929
	Ceratocarpus arenarius	525.43	0.170929	556.6	21.5948	641.32	16.9378	722.84	1.56998	1.13735	7.67812
	Ceratocarpus arenarius	525.43	0.176825	556.6	18.2518	641.32	16.7626	722.84	2.04725	1.4254	10.1814
	Ceratocarpus arenarius	525.43	0.312935	556.6	19.4651	641.32	8.97231	722.84	1.90156	1.38657	8.73055
	Ceratocarpus arenarius	525.43	0.126254	556.6	13.2253	641.32	13.2179	722.84	1.83652	1.94492	14.2849
	Ceratocarpus arenarius	525.43	0.276708	556.6	11.269	641.32	11.1112	722.84	1.99738	1.1084	8.24081
	Ceratocarpus arenarius	525.43	0.233589	556.6	20.7131	641.32	17.5102	722.84	1.5436	1.42913	9.72284
	Ceratocarpus arenarius	525.43	0.243671	556.6	15.275	641.32	22.0914	722.84	1.73909	1.49218	10.2763
	Ceratocarpus arenarius	525.43	0.462377	556.6	18.0787	641.32	16.9203	722.84	1.96928	1.57996	11.4867
	Ceratocarpus arenarius	525.43	0.395798	556.6	17.8212	641.32	17.5985	722.84	1.52252	1.60636	10.7011
	Ceratocarpus arenarius	525.43	0.143377	556.6	18.192	641.32	21.073	722.84	1.79146	1.65606	13.0012
	Ceratocarpus arenarius	525.43	0.354657	556.6	15.5775	641.32	13.2524	722.84	1.68856	1.19957	10.4034
	Ceratocarpus arenarius	525.43	0.249794	556.6	15.1261	641.32	12.7113	722.84	1.05356	1.68046	11.8869
	Ceratocarpus arenarius	525.43	0.417655	556.6	16.9698	641.32	14.7878	722.84	1.94467	1.50249	10.9253
	Ceratocarpus arenarius	525.43	0.42845	556.6	17.7527	641.32	13.6732	722.84	1.48863	2.03279	15.5925
	Ceratocarpus arenarius	525.43	0.334591	556.6	21.8531	641.32	12.9698	722.84	1.84554	1.59229	12.1121
	Ceratocarpus arenarius	525.43	0.363405	556.6	12.4357	641.32	13.7461	722.84	1.58954	1.50322	14.4276
	Ceratocarpus arenarius	525.43	0.344885	556.6	15.7116	641.32	13.8543	722.84	1.24458	1.44931	11.8889
	Ceratocarpus arenarius	525.43	0.29046	556.6	17.0301	641.32	11.0106	722.84	1.70859	1.37681	7.56083
	Ceratocarpus arenarius	525.43	0.374482	556.6	16.8472	641.32	10.0296	722.84	1.71559	1.39735	10.8317
	Ceratocarpus arenarius	525.43	0.324714	556.6	15.367	641.32	10.54	722.84	1.40873	2.32557	17.0281
	Ceratocarpus arenarius	525.43	0.337762	556.6	15.9182	641.32	11.6856	722.84	1.49255	1.27901	13.8726
	Ceratocarpus arenarius	525.43	0.328032	556.6	17.9861	641.32	15.8857	722.84	2.51007	1.31528	10.9633
	Ceratocarpus arenarius	525.43	0.325308	556.6	16.5464	641.32	13.7215	722.84	1.2965	2.32522	21.1824
	Ceratocarpus arenarius	525.43	0.394548	556.6	14.8899	641.32	15.3677	722.84	1.34344	2.41572	21.2704
	Ceratocarpus arenarius	525.43	0.364252	556.6	21.5253	641.32	16.2083	722.84	1.30625	1.04079	8.01254
	Ceratocarpus arenarius	525.43	0.221607	556.6	19.4747	641.32	15.5088	722.84	1.99407	2.5407	20.2639
	Ceratocarpus arenarius	525.43	0.149844	556.6	17.4044	641.32	9.8474	722.84	1.2088	1.74882	15.2336
	Ceratocarpus arenarius	525.43	0.237827	556.6	12.0956	641.32	8.95621	722.84	0.922813	2.47596	17.459
	Ceratocarpus arenarius	525.43	0.263982	556.6	15.5216	641.32	12.548	722.84	1.32771	2.53187	19.3563
	Ceratocarpus arenarius	525.43	0.356946	556.6	16.1056	641.32	10.8643	722.84	1.18452	2.35942	18.1924
	Ceratocarpus arenarius	525.43	0.188788	556.6	18.5387	641.32	12.1145	722.84	1.08333	2.6102	19.8452
	Ceratocarpus arenarius	525.43	0.16479	556.6	14.494	641.32	14.9784	722.84	1.02922	2.78961	18.2403
	Ceratocarpus arenarius	525.43	0.155968	556.6	12.4231	641.32	15.7657	722.84	1.20399	2.20407	17.8531
	Ceratocarpus arenarius	525.43	0.221435	556.6	14.4987	641.32	15.3674	722.84	1.50537	2.24429	15.9467
	Ceratocarpus arenarius	525.43	0.282722	556.6	13.7411	641.32	16.6437	722.84	0.897498	2.22494	15.9036
	Ceratocarpus arenarius	525.43	0.333625	556.6	12.5861	641.32	15.7527	722.84	1.44893	1.85645	18.9903
	Ceratocarpus arenarius	525.43	0.289083	556.6	19.3291	641.32	12.2049	722.84	1.05374	1.92922	18.6055
	Ceratocarpus arenarius	525.43	0.336476	556.6	13.4367	641.32	15.9529	722.84	1.01111	2.52632	20.6375
	Ceratocarpus arenarius	525.43	0.249994	556.6	12.854	641.32	11.3465	722.84	1.56966	3.12075	23.0519
	Ceratocarpus arenarius	525.43	0.24595	556.6	15.0353	641.32	12.5191	722.84	1.30846	1.68841	14.708
	Ceratocarpus arenarius	525.43	0.311714	556.6	13.7967	641.32	16.7142	722.84	0.744266	1.77674	14.9658
	Ceratocarpus arenarius	525.43	0.353726	556.6	15.5961	641.32	16.9149	722.84	0.993698	1.25705	10.2219
	Ceratocarpus arenarius	525.43	0.352321	556.6	14.7636	641.32	17.8564	722.84	1.72041	1.62112	13.8041
	Ceratocarpus arenarius	525.43	0.362085	556.6	12.29	641.32	18.8615	722.84	1.43776	1.75228	14.9033
	Ceratocarpus arenarius	525.43	0.472075	556.6	13.6073	641.32	13.7498	722.84	1.20064	2.61965	16.2652
	Ceratocarpus arenarius	525.43	0.313448	556.6	12.6096	641.32	23.5316	722.84	0.867028	1.95151	15.4463
	Ceratocarpus arenarius	525.43	0.471683	556.6	13.6949	641.32	19.4621	722.84	1.28841	2.60133	18.5716
	Ceratocarpus arenarius	525.43	0.341552	556.6	12.8161	641.32	17.4877	722.84	1.54799	2.00909	10.775
	Ceratocarpus arenarius	525.43	0.430736	556.6	13.0688	641.32	28.405	722.84	1.20975	2.59535	16.9531
	Ceratocarpus arenarius	525.43	0.286544	556.6	12.8451	641.32	18.8824	722.84	1.21424	1.2692	10.3378
	Ceratocarpus arenarius	525.43	0.272645	556.6	17.0511	641.32	16.495	722.84	1.46017	2.02215	13.7727
	Ceratocarpus arenarius	525.43	0.379083	556.6	10.8905	641.32	20.9101	722.84	1.49704	1.17807	10.3832
	Ceratocarpus arenarius	525.43	0.446294	556.6	15.5702	641.32	24.3376	722.84	1.38112	1.95028	15.1105
	Ceratocarpus arenarius	525.43	0.407429	556.6	14.1749	641.32	19.9607	722.84	1.18998	1.88204	15.1336
	Ceratocarpus arenarius	525.43	0.447508	556.6	17.6534	641.32	16.2323	722.84	1.51727	1.80371	13.1311
	Ceratocarpus arenarius	525.43	0.42575	556.6	11.3882	641.32	21.2343	722.84	1.27136	1.38921	11.9018
	Ceratocarpus arenarius	525.43	0.424339	556.6	19.1889	641.32	20.1451	722.84	1.02164	1.9014	12.4605
	Ceratocarpus arenarius	525.43	0.336958	556.6	18.8968	641.32	19.265	722.84	1.62062	2.45927	18.8074
	Ceratocarpus arenarius	525.43	0.402849	556.6	13.1858	641.32	18.7141	725.59	0.498236	1.98213	18.8098
	Ceratocarpus arenarius	525.43	0.41547	556.6	23.9538	641.32	17.8265	725.59	0.584067	2.46283	19.8383
	Ceratocarpus arenarius	525.43	0.339645	556.6	23.63	641.32	25.5376	725.59	1.0867	2.4154	21.7309
	Ceratocarpus arenarius	525.43	0.460996	556.6	23.6686	641.32	20.6714	725.59	0.39355	1.74172	15.7805
	Ceratocarpus arenarius	525.43	0.176403	556.6	17.3744	641.32	19.5213	725.59	0.934607	1.84187	15.7514
	Ceratocarpus arenarius	525.43	0.29746	556.6	20.4202	641.32	19.1673	725.59	0.81795	1.74607	14.2524
	Ceratocarpus arenarius	525.43	0.322518	556.6	15.8788	641.32	11.9428	725.59	0.91628	1.72987	13.6306
	Ceratocarpus arenarius	525.43	0.329058	556.6	18.7727	641.32	20.5327	725.59	0.232931	2.41745	18.227
	Ceratocarpus arenarius	525.43	0.373823	556.6	21.925	641.32	24.2569	725.59	0.26478	2.38865	17.5551
	Ceratocarpus arenarius	525.43	0.386647	556.6	13.0988	641.32	16.7516	725.59	0.545746	2.51699	19.3208
	Ceratocarpus arenarius	525.43	0.322484	556.6	18.9236	641.32	25.4055	725.59	0.70926	2.15216	16.8471
	Ceratocarpus arenarius	525.43	0.341986	556.6	17.5681	641.32	18.9634	725.59	0.941401	2.48027	20.107
	Ceratocarpus arenarius	525.43	0.446145	556.6	15.6956	641.32	19.6409	725.59	1.0695	2.23827	20.7256
	Ceratocarpus arenarius	525.43	0.317655	556.6	16.1126	641.32	15.7173	725.59	1.18997	2.7268	19.2748
	Ceratocarpus arenarius	525.43	0.313149	556.6	15.1373	641.32	23.7523	725.59	1.10308	2.80235	26.7313
	Ceratocarpus arenarius	525.43	0.461692	556.6	19.5286	641.32	23.2921	725.59	1.04142	2.4739	22.7044
	Ceratocarpus arenarius	525.43	0.321224	556.6	15.4743	641.32	27.0709	725.59	1.48434	4.83806	32.1208
	Ceratocarpus arenarius	525.43	0.41976	556.6	28.7596	641.32	13.2167	725.59	0.567315	2.85373	20.0808
	Ceratocarpus arenarius	525.43	0.369774	556.6	18.9455	641.32	24.4045	728.34	1.15645	2.44445	15.2449
	Ceratocarpus arenarius	525.43	0.428935	556.6	20.3073	641.32	21.2272	728.34	1.2394	2.58177	15.4572
	Ceratocarpus arenarius	525.43	0.325546	556.6	23.6975	641.32	19.9593	728.34	1.25528	2.6986	15.7369
	Ceratocarpus arenarius	525.43	0.469857	556.6	21.0466	641.32	26.2748	728.34	1.28858	2.75664	21.5515
	Ceratocarpus arenarius	525.43	0.293296	556.6	20.261	641.32	18.9922	728.34	1.1656	2.49971	20.865
	Ceratocarpus arenarius	525.43	0.470536	556.6	22.5099	641.32	20.521	728.34	0.876353	2.43816	18.2532
	Ceratocarpus arenarius	525.43	0.326877	556.6	22.2678	641.32	19.3139	728.34	1.07217	2.19706	17.2051
	Ceratocarpus arenarius	525.43	0.46994	556.6	21.3284	641.32	15.9769	728.34	1.1542	2.49691	17.4886
	Ceratocarpus arenarius	525.43	0.372554	556.6	17.3009	641.32	17.7308	728.34	1.89549	2.30548	19.4103
	Ceratocarpus arenarius	525.43	0.408343	559.22	25.9058	641.32	18.2602	728.34	0.902911	2.6588	18.0928
	Ceratocarpus arenarius	525.43	0.361621	559.22	19.3055	641.32	17.6775	728.34	0.695665	2.78294	18.1584
	Ceratocarpus arenarius	525.43	0.576056	559.22	15.5358	641.32	22.954	728.34	2.63234	2.59448	19.1174
	Ceratocarpus arenarius	525.43	0.368433	559.22	15.9174	641.32	19.9265	728.34	1.41209	2.49752	19.9961
	Ceratocarpus arenarius	525.43	0.545006	559.22	22.0034	641.32	19.8583	728.34	0.639121	2.26539	18.0125
	Ceratocarpus arenarius	525.43	0.246917	559.22	12.8368	641.32	20.6629	728.34	0.33454	1.72094	15.3537
	Ceratocarpus arenarius	525.43	0.275933	559.22	13.5292	641.32	24.0442	728.34	0.781554	2.37479	18.3314
	Ceratocarpus arenarius	525.43	0.357063	559.22	17.3686	641.32	18.8185	728.34	1.44617	2.53652	18.3051
	Ceratocarpus arenarius	525.43	0.352867	559.22	36.3687	641.32	26.351	728.34	0.700907	2.48076	20.4112
	Ceratocarpus arenarius	525.43	0.493373	559.22	22.0017	641.32	22.8124	728.34	0.489788	2.58498	16.4146
	Ceratocarpus arenarius	525.43	0.410891	559.22	10.5248	641.32	23.5499	728.34	0.719472	3.45025	17.3729
	Ceratocarpus arenarius	525.43	0.325393	559.22	22.2267	641.32	20.9514	728.34	1.10577	2.78667	22.4177
	Ceratocarpus arenarius	525.43	0.465954	559.22	24.2344	641.32	11.9422	728.34	0.621609	2.50133	19.3247
	Ceratocarpus arenarius	525.43	0.382476	559.22	13.0892	641.32	21.7025	728.34	0.86878	2.60516	18.4544
	Ceratocarpus arenarius	525.43	0.32927	559.22	14.7667	641.32	15.4743	728.34	0.960169	3.08001	19.8787
	Ceratocarpus arenarius	525.43	0.582218	559.22	18.3165	641.32	17.6741	728.34	1.00924	2.10101	14.7827
	Ceratocarpus arenarius	525.43	0.39469	559.22	15.891	641.32	17.3865	728.34	0.467867	2.02389	17.0143
	Ceratocarpus arenarius	525.43	0.419276	559.22	15.8237	641.32	15.1008	728.34	0.912889	2.1709	14.2303
	Ceratocarpus arenarius	525.43	0.536897	559.22	24.1784	641.32	19.8718	728.34	0.96803	2.97265	21.2231
	Ceratocarpus arenarius	525.43	0.457335	559.22	26.5513	641.32	21.7428	728.34	1.44491	2.42506	18.22
	Ceratocarpus arenarius	525.43	0.477595	559.22	21.0935	641.32	20.7225	728.34	0.718306	2.88981	16.8138
	Ceratocarpus arenarius	525.43	0.555524	559.22	17.2175	641.32	26.1848	728.34	1.06553	2.30743	16.9558
	Ceratocarpus arenarius	525.43	0.440419	559.22	15.9137	641.32	19.3218	728.34	1.05445	2.63776	19.1558
	Ceratocarpus arenarius	525.43	0.439345	559.22	16.2216	641.32	18.1165	728.34	1.28004	2.37305	19.0433
	Ceratocarpus arenarius	525.43	0.360405	559.22	17.1341	641.32	18.4889	728.34	1.25957	2.54975	18.5717
	Ceratocarpus arenarius	525.43	0.232423	559.22	22.9031	641.32	18.6523	728.34	1.02019	3.23208	20.5784
	Ceratocarpus arenarius	525.43	0.495486	559.22	20.1742	641.32	18.2691	728.34	0.732333	2.22059	17.5173
	Ceratocarpus arenarius	525.43	0.305651	559.22	15.746	641.32	12.869	728.34	0.154335	2.54648	17.205
	Ceratocarpus arenarius	525.43	0.535591	559.22	11.6649	641.32	23.8644	728.34	0.403288	2.53214	18.2245
	Ceratocarpus arenarius	525.43	0.471627	559.22	19.1478	641.32	23.5369	728.34	0.607563	2.7323	20.8908
	Ceratocarpus arenarius	525.43	0.380685	559.22	19.5101	641.32	22.7914	728.34	1.01531	2.37352	20.3451
	Ceratocarpus arenarius	525.43	0.490198	559.22	20.2708	641.32	24.0733	728.34	1.23388	2.85207	21.9952
	Ceratocarpus arenarius	525.43	0.36419	559.22	18.4291	641.32	19.9309	728.34	0.593423	3.03107	20.2968
	Ceratocarpus arenarius	525.43	0.343042	559.22	12.1807	641.32	19.0873	728.34	0.539304	2.49438	19.3747
	Ceratocarpus arenarius	525.43	0.234649	559.22	13.5144	641.32	21.3449	728.34	1.03587	3.19812	22.4511
	Ceratocarpus arenarius	525.43	0.499278	559.22	14.3413	641.32	21.004	728.34	0.71145	2.49225	14.7636
	Ceratocarpus arenarius	525.43	0.451444	559.22	14.4493	641.32	17.0541	728.34	0.921073	3.27558	21.2242
	Ceratocarpus arenarius	525.43	0.365583	559.22	17.4746	641.32	17.0058	728.34	1.41059	2.41253	20.3798
	Ceratocarpus arenarius	525.43	0.451349	559.22	22.7	641.32	13.3318	728.34	0.756119	2.02974	15.6378
	Ceratocarpus arenarius	525.43	0.430391	559.22	11.3586	641.32	21.9004	728.34	0.370115	2.79243	18.9995
	Ceratocarpus arenarius	525.43	0.340548	559.22	19.7329	641.32	13.0613	728.34	0.598512	2.52936	24.1074
	Ceratocarpus arenarius	525.43	0.296514	559.22	27.6943	641.32	17.2137	728.34	0.981639	2.55448	26.7407
	Ceratocarpus arenarius	525.43	0.43104	559.22	18.2002	641.32	13.1251	728.34	1.0136	2.92769	25.2455
	Ceratocarpus arenarius	525.43	0.376522	559.22	23.0639	641.32	16.4987	728.34	0.7995	2.01439	17.213
	Ceratocarpus arenarius	525.43	0.317905	559.22	15.338	641.32	25.6799	728.34	0.719369	2.89714	25.0771
	Ceratocarpus arenarius	525.43	0.281581	559.22	22.2087	641.32	16.9044	728.34	0.499208	2.68314	22.3087
	Ceratocarpus arenarius	525.43	0.329016	559.22	19.6529	641.32	14.0674	728.34	1.0051	3.46371	26.4379
	Ceratocarpus arenarius	525.43	0.214433	559.22	21.9493	641.32	18.4032	728.34	0.605677	3.59105	27.5641
	Ceratocarpus arenarius	525.43	0.285881	559.22	12.0431	641.32	20.3798	728.34	0.527407	2.85931	23.6885
	Ceratocarpus arenarius	525.43	0.444157	559.22	20.9578	641.32	12.966	728.34	0.682817	2.54993	23.053
	Ceratocarpus arenarius	525.43	0.287708	559.22	19.6233	641.32	12.6846	728.34	0.955274	2.50169	21.2122
	Ceratocarpus arenarius	525.43	0.318383	559.22	15.1621	641.32	12.773	728.34	0.787163	3.23786	26.8199
	Ceratocarpus arenarius	525.43	0.280726	559.22	15.9137	641.32	15.1066	728.34	0.469532	3.13097	28.0697
	Ceratocarpus arenarius	525.43	0.344202	559.22	21.9886	641.32	13.7077	728.34	1.07995	2.45166	20.7518
	Ceratocarpus arenarius	525.43	0.403946	559.22	21.8536	641.32	18.4047	728.34	1.13348	3.45123	25.3353
	Ceratocarpus arenarius	525.43	0.239492	559.22	22.7111	641.32	15.2098	728.34	0.672875	3.13862	22.9255
	Ceratocarpus arenarius	525.43	0.416228	559.22	22.124	641.32	16.1885	728.34	0.823554	2.67277	22.9664
	Ceratocarpus arenarius	525.43	0.428613	559.22	19.6949	641.32	16.7818	728.34	0.969337	2.79767	25.6284
	Ceratocarpus arenarius	525.43	0.360383	559.22	28.8672	641.32	19.1772	728.34	0.933913	2.87585	25.1321
	Ceratocarpus arenarius	525.43	0.310942	559.22	23.2091	641.32	15.1483	728.34	1.11106	2.44474	22.0855
	Ceratocarpus arenarius	525.43	0.385681	559.22	39.2206	641.32	15.0626	728.34	0.508127	2.71304	27.6694
	Ceratocarpus arenarius	525.43	0.268387	559.22	25.8832	641.32	14.3112	728.34	0.933393	2.90501	22.2809
	Ceratocarpus arenarius	525.43	0.343081	559.22	22.1358	641.32	14.5125	728.34	0.839542	2.28277	23.2379
	Ceratocarpus arenarius	525.43	0.444065	559.22	25.8318	641.32	14.3517	728.34	0.755115	2.50968	20.614
	Ceratocarpus arenarius	528.01	0.226548	559.22	29.447	641.32	14.1341	728.34	0.985893	2.1283	17.7276
	Ceratocarpus arenarius	528.01	0.450776	559.22	22.5085	641.32	16.0003	728.34	0.80944	3.11146	26.0662
	Ceratocarpus arenarius	528.01	0.240373	559.22	26.703	641.32	15.8823	728.34	0.268675	2.33741	19.5448
	Ceratocarpus arenarius	528.01	0.321167	559.22	24.5739	641.32	14.4035	728.34	0.468282	2.78285	24.7245
	Ceratocarpus arenarius	528.01	0.286796	559.22	24.0096	641.32	13.7591	728.34	0.296361	2.19236	20.38
	Ceratocarpus arenarius	530.55	0.239597	559.22	30.7621	641.32	17.0901	728.34	0.637681	2.13362	18.3741
	Ceratocarpus arenarius	530.55	0.219153	559.22	26.1591	641.32	15.9994	728.34	0.440613	4.89934	29.6912
	Ceratocarpus arenarius	530.55	0.224575	559.22	23.9311	641.32	14.1093	728.34	0.760746	2.62493	20.2746
	Ceratocarpus arenarius	530.55	0.183659	559.22	25.8415	641.32	13.2881	728.34	1.23345	2.08053	18.8217
	Ceratocarpus arenarius	530.55	0.353339	559.22	30.1289	641.32	15.3695	728.34	0.775121	2.51776	21.3098
	Ceratocarpus arenarius	530.55	0.158554	559.22	22.8176	641.32	17.1276	728.34	1.31127	4.39631	34.3866
	Ceratocarpus arenarius	530.55	0.304268	559.22	30.0108	641.32	17.944	728.34	0.643232	2.72918	21.2504
	Ceratocarpus arenarius	530.55	0.203944	559.22	26.9388	641.32	17.0159	728.34	1.04034	1.98266	21.6105
	Ceratocarpus arenarius	530.55	0.206214	559.22	26.3197	641.32	21.4866	728.34	0.940877	1.91995	19.0688
	Ceratocarpus arenarius	530.55	0.117355	559.22	22.2099	641.32	16.0753	728.34	0.858242	3.05189	27.7224
	Ceratocarpus arenarius	530.55	0.240615	559.22	29.2709	641.32	15.6792	728.34	0.850347	2.51775	17.349
	Ceratocarpus arenarius	530.55	0.199673	559.22	27.7863	641.32	17.4459	731.1	0.761788	2.00359	15.4993
	Ceratocarpus arenarius	530.55	0.225952	559.22	28.9049	641.32	15.038	731.1	0.937004	2.36829	19.7036
	Ceratocarpus arenarius	530.55	0.23827	559.22	25.3304	641.32	19.4648	731.1	0.583234	2.43267	19.295
	Ceratocarpus arenarius	530.55	0.222073	559.22	31.9836	641.32	13.0743	731.1	0.465133	2.50813	17.5999
	Ceratocarpus arenarius	530.55	0.168264	559.22	24.456	641.32	18.2549	731.1	0.780399	2.74398	18.6481
	Ceratocarpus arenarius	530.55	0.16626	559.22	26.0447	641.32	24.4802	731.1	0.903484	2.75509	19.1214
	Ceratocarpus arenarius	530.55	0.151232	559.22	25.5003	644.01	16.7461	733.86	0.616288	2.35745	20.4233
	Ceratocarpus arenarius	530.55	0.195262	559.22	28.8459	644.01	19.7813	736.62	0.926738	2.65255	18.5239
	Ceratocarpus arenarius	530.55	0.234274	559.22	26.0079	644.01	23.6939	736.62	0.578524	2.38723	16.9951
	Ceratocarpus arenarius	530.55	0.198121	559.22	27.2237	644.01	11.8796	736.62	0.517567	2.5296	21.6082
	Ceratocarpus arenarius	530.55	0.200702	559.22	30.426	644.01	8.69463	736.62	0.567391	2.70817	17.1782
	Ceratocarpus arenarius	530.55	0.125919	559.22	33.5848	644.01	14.8559	736.62	0.52519	2.40377	17.6154
	Ceratocarpus arenarius	530.55	0.198204	559.22	31.1436	644.01	17.805	736.62	1.03529	2.76294	21.5569
	Ceratocarpus arenarius	530.55	0.144478	559.22	27.2093	644.01	11.035	742.14	0.857161	2.94392	21.8042
	Ceratocarpus arenarius	530.55	0.202804	559.22	16.8439	644.01	15.1455	744.91	0.0757399	2.27897	13.856
	Ceratocarpus arenarius	530.55	0.156216	559.22	21.6246	644.01	13.552	744.91	0.773649	2.2216	15.9885
	Ceratocarpus arenarius	530.55	0.161927	559.22	24.6222	644.01	17.1141	744.91	1.5248	3.04139	21.1805
	Ceratocarpus arenarius	530.55	0.110337	559.22	26.6286	644.01	21.3989	744.91	1.19249	1.93746	18.8914
	Ceratocarpus arenarius	530.55	0.165446	559.22	25.2759	644.01	11.6041	744.91	1.13117	2.33755	20.3242
	Ceratocarpus arenarius	530.55	0.154972	559.22	24.1539	644.01	16.4748	744.91	0.997353	2.82785	22.7467
	Ceratocarpus arenarius	530.55	0.152627	559.22	26.1584	644.01	12.2554	744.91	0.953843	2.31223	14.9157
	Ceratocarpus arenarius	530.55	0.130006	559.22	29.4763	644.01	13.5083	744.91	0.957089	2.61988	17.0426
	Ceratocarpus arenarius	530.55	0.201119	559.22	30.1354	644.01	11.5591	744.91	1.23846	2.48182	18.974
	Ceratocarpus arenarius	530.55	0.0965746	559.22	22.8318	644.01	10.3902	744.91	1.19351	2.54227	14.7008
	Ceratocarpus arenarius	530.55	0.138417	559.22	18.4305	644.01	10.442	744.91	1.81288	2.46095	15.9868
	Ceratocarpus arenarius	530.55	0.116446	559.22	24.3102	644.01	14.5211	744.91	1.40612	2.55561	18.5731
	Ceratocarpus arenarius	530.55	0.159129	559.22	31.9099	644.01	13.8301	744.91	1.10559	2.30723	20.8643
	Ceratocarpus arenarius	530.55	0.120468	559.22	18.0879	644.01	11.542	744.91	1.28817	2.51397	17.1032
	Ceratocarpus arenarius	530.55	0.354079	559.22	18.7902	644.01	17.1152	744.91	1.03937	2.17904	17.0288
	Ceratocarpus arenarius	530.55	0.209097	559.22	19.768	644.01	15.6843	744.91	0.921083	2.16414	17.1042
	Ceratocarpus arenarius	530.55	0.28979	559.22	19.3109	646.7	18.071	744.91	1.03757	2.04082	18.1327
	Ceratocarpus arenarius	530.55	0.181464	559.22	19.8213	646.7	13.9048	744.91	1.24217	2.28165	16.3694
	Ceratocarpus arenarius	530.55	0.256623	559.22	23.3637	649.38	13.2984	744.91	1.34932	2.69257	18.8354
	Petrosimonia sibirica	512.53	0.0664488	551.39	20.1287	641.32	14.8999	711.85	0.773387	2.3048	17.2071
	Petrosimonia sibirica	520.26	0.214659	551.39	15.7316	641.32	15.4115	711.85	0.867942	1.95788	16.6375
	Petrosimonia sibirica	520.26	0.130831	551.39	18.3349	641.32	9.68766	714.59	0.540202	1.64776	18.9878
	Petrosimonia sibirica	520.26	0.255393	551.39	19.5118	641.32	14.0144	714.59	0.603917	2.12403	19.989
	Petrosimonia sibirica	520.26	0.0999536	551.39	9.77999	641.32	10.1483	717.34	0.897631	1.36727	18.8796
	Petrosimonia sibirica	522.84	0.207679	551.39	12.305	641.32	9.60389	717.34	0.620252	1.65037	18.5467
	Petrosimonia sibirica	522.84	0.204351	551.39	8.1768	641.32	11.3118	717.34	0.521325	1.78827	22.4067
	Petrosimonia sibirica	522.84	0.259526	551.39	9.37428	641.32	11.4392	717.34	0.902171	1.69961	17.7052
	Petrosimonia sibirica	522.84	0.209067	551.39	11.1762	641.32	11.4912	717.34	0.647613	1.6761	21.1503
	Petrosimonia sibirica	522.84	0.192198	551.39	9.10664	641.32	13.0932	717.34	0.415996	1.80148	20.1619
	Petrosimonia sibirica	522.84	0.218821	551.39	8.69745	641.32	12.8045	717.34	0.319465	1.93041	21.8983
	Petrosimonia sibirica	522.84	0.18544	551.39	9.20643	641.32	13.1653	717.34	0.590706	1.86885	20.5842
	Petrosimonia sibirica	525.43	0.297377	551.39	7.86695	641.32	11.9456	720.09	0.888567	1.86337	18.0235
	Petrosimonia sibirica	525.43	0.272238	551.39	11.3271	641.32	12.1738	720.09	0.908708	1.55271	17.6854
	Petrosimonia sibirica	525.43	0.262671	551.39	8.71791	641.32	16.91	720.09	0.698591	1.84269	20.1989
	Petrosimonia sibirica	525.43	0.283829	551.39	9.67696	641.32	11.5273	722.84	1.15905	1.66702	18.2628
	Petrosimonia sibirica	525.43	0.21973	551.39	9.7444	641.32	13.315	722.84	1.24219	1.86971	21.6523
	Petrosimonia sibirica	525.43	0.264917	551.39	7.60778	641.32	12.148	722.84	1.02406	1.88245	22.7501
	Petrosimonia sibirica	525.43	0.266544	551.39	8.68829	641.32	10.6836	722.84	1.59356	1.44862	15.5151
	Petrosimonia sibirica	525.43	0.27656	551.39	9.20051	641.32	10.844	722.84	1.41955	1.71855	19.2461
	Petrosimonia sibirica	525.43	0.260593	551.39	8.6242	641.32	15.4139	722.84	1.00199	2.17219	20.5753
	Petrosimonia sibirica	525.43	0.226016	551.39	14.0388	641.32	9.76888	722.84	1.15887	1.42179	15.0848
	Petrosimonia sibirica	525.43	0.26227	551.39	12.1438	641.32	15.2072	722.84	1.21831	1.92096	20.3558
	Petrosimonia sibirica	525.43	0.27605	551.39	13.5091	641.32	16.3009	722.84	1.11484	2.22672	19.7457
	Petrosimonia sibirica	525.43	0.254575	551.39	12.7161	641.32	13.0052	722.84	1.12852	1.8	20.5233
	Petrosimonia sibirica	525.43	0.240704	551.39	10.4585	641.32	14.7662	722.84	1.02342	1.92674	17.726
	Petrosimonia sibirica	525.43	0.332034	551.39	18.7474	641.32	14.0385	722.84	1.02772	1.65471	16.4565
	Petrosimonia sibirica	525.43	0.246448	551.39	13.9386	641.32	17.3184	722.84	0.978409	2.1309	18.166
	Petrosimonia sibirica	525.43	0.256006	551.39	14.1689	641.32	14.8414	722.84	0.806839	1.81806	18.164
	Petrosimonia sibirica	525.43	0.169591	551.39	12.3115	641.32	15.0892	722.84	0.840446	1.74511	16.5059
	Petrosimonia sibirica	525.43	0.28376	551.39	10.089	641.32	14.2861	722.84	1.12315	1.89059	17.3042
	Petrosimonia sibirica	525.43	0.281639	551.39	13.6091	641.32	13.8677	722.84	0.879161	1.56731	14.8714
	Petrosimonia sibirica	525.43	0.228548	551.39	11.0735	641.32	13.6846	722.84	0.965359	1.55811	15.295
	Petrosimonia sibirica	525.43	0.288397	551.39	20.4128	641.32	14.145	722.84	0.758353	1.75429	16.2555
	Petrosimonia sibirica	525.43	0.423018	551.39	14.2347	641.32	15.9331	722.84	1.24898	1.59144	13.5344
	Petrosimonia sibirica	525.43	0.270933	551.39	14.4068	641.32	14.9961	722.84	1.10577	1.80016	16.347
	Petrosimonia sibirica	525.43	0.305419	553.99	20.6526	641.32	11.7484	722.84	1.06789	1.84635	19.067
	Petrosimonia sibirica	525.43	0.220385	553.99	14.3031	641.32	11.9657	722.84	1.02992	1.60129	17.6344
	Petrosimonia sibirica	525.43	0.279091	553.99	16.8957	641.32	13.9944	722.84	1.11679	1.68763	17.1171
	Petrosimonia sibirica	525.43	0.25272	553.99	16.6956	641.32	13.7546	722.84	0.942627	1.76609	17.7995
	Petrosimonia sibirica	525.43	0.286536	553.99	18.213	641.32	16.2936	722.84	1.24648	1.95583	20.1347
	Petrosimonia sibirica	525.43	0.265194	553.99	11.3523	641.32	13.3024	722.84	1.05085	2.20065	22.1908
	Petrosimonia sibirica	525.43	0.217617	553.99	11.6229	641.32	11.3329	722.84	0.901657	1.68119	19.8219
	Petrosimonia sibirica	525.43	0.205768	553.99	8.5838	641.32	11.4719	722.84	0.789986	1.55346	17.3775
	Petrosimonia sibirica	525.43	0.276881	553.99	10.2809	641.32	7.82038	722.84	0.873008	1.51892	16.6292
	Petrosimonia sibirica	525.43	0.217685	553.99	10.3689	641.32	15.4557	722.84	0.829202	1.38699	12.4469
	Petrosimonia sibirica	525.43	0.369113	553.99	12.2622	641.32	14.3117	722.84	0.932538	1.85375	16.3221
	Petrosimonia sibirica	525.43	0.289361	553.99	7.186	641.32	11.0248	722.84	1.12979	1.94587	20.1511
	Petrosimonia sibirica	525.43	0.283121	553.99	7.80253	641.32	13.4242	722.84	0.929585	1.34051	14.4686
	Petrosimonia sibirica	525.43	0.307909	553.99	9.94416	641.32	13.4308	722.84	1.18885	2.0305	19.4423
	Petrosimonia sibirica	525.43	0.380107	553.99	12.2695	641.32	13.3282	722.84	1.07526	1.78463	18.6268
	Petrosimonia sibirica	525.43	0.396085	553.99	16.8611	641.32	9.01761	722.84	0.994776	1.9085	20.9837
	Petrosimonia sibirica	525.43	0.311837	553.99	17.3064	641.32	11.5808	722.84	1.05357	1.24437	13.2222
	Petrosimonia sibirica	525.43	0.281169	553.99	11.5624	641.32	8.66435	722.84	0.967458	1.42215	16.8856
	Petrosimonia sibirica	525.43	0.270891	553.99	12.813	641.32	11.1728	722.84	1.21251	1.28988	12.6254
	Petrosimonia sibirica	525.43	0.174555	553.99	17.7161	641.32	17.5337	722.84	1.10292	1.45992	15.0391
	Petrosimonia sibirica	525.43	0.332976	553.99	13.5531	641.32	13.4439	722.84	1.122	2.37456	19.9086
	Petrosimonia sibirica	525.43	0.336506	553.99	13.9093	641.32	13.2484	722.84	1.1672	1.73264	20.2789
	Petrosimonia sibirica	525.43	0.246091	553.99	13.1594	641.32	13.4743	722.84	1.09562	1.9921	17.1026
	Petrosimonia sibirica	525.43	0.29625	553.99	15.0113	641.32	11.0437	722.84	0.961036	1.8264	16.7349
	Petrosimonia sibirica	525.43	0.330579	553.99	14.2151	641.32	13.5857	722.84	0.92001	1.57388	16.0696
	Petrosimonia sibirica	525.43	0.157935	553.99	15.7045	641.32	12.4828	722.84	0.817335	1.75418	17.3788
	Petrosimonia sibirica	525.43	0.21851	553.99	17.7689	641.32	14.0405	722.84	0.999653	1.48544	14.6549
	Petrosimonia sibirica	525.43	0.172147	553.99	20.9757	641.32	13.1804	722.84	1.26441	2.14546	21.2843
	Petrosimonia sibirica	525.43	0.189494	553.99	14.6467	641.32	18.5007	722.84	0.745264	2.06032	18.5147
	Petrosimonia sibirica	525.43	0.442065	553.99	27.2046	641.32	12.7024	722.84	0.97779	2.01966	15.38
	Petrosimonia sibirica	525.43	0.269266	553.99	17.5592	641.32	8.09979	722.84	0.862536	1.91228	19.9378
	Petrosimonia sibirica	525.43	0.287046	553.99	17.4955	641.32	15.0241	722.84	0.67153	1.56143	12.3743
	Petrosimonia sibirica	525.43	0.250895	553.99	16.4159	641.32	14.2499	722.84	0.430073	1.65732	15.8598
	Petrosimonia sibirica	525.43	0.226125	553.99	16.538	641.32	12.9451	722.84	0.382937	1.7044	13.9605
	Petrosimonia sibirica	525.43	0.255444	553.99	12.1863	641.32	12.1711	722.84	0.960431	1.87586	16.9378
	Petrosimonia sibirica	525.43	0.204244	553.99	12.756	641.32	16.1637	722.84	0.857476	1.89641	19.317
	Petrosimonia sibirica	525.43	0.351185	553.99	13.1004	641.32	12.7001	722.84	0.864153	1.88622	16.7754
	Petrosimonia sibirica	525.43	0.290998	553.99	17.0798	641.32	13.5569	722.84	1.18777	1.57472	16.3129
	Petrosimonia sibirica	525.43	0.23881	553.99	16.4599	641.32	16.4022	722.84	1.00312	1.90939	20.9169
	Petrosimonia sibirica	525.43	0.311397	553.99	10.9537	641.32	13.3814	722.84	1.16905	1.80466	18.3659
	Petrosimonia sibirica	525.43	0.239425	553.99	10.3206	641.32	18.528	722.84	0.980379	1.8653	18.1107
	Petrosimonia sibirica	525.43	0.223171	556.6	18.1256	641.32	10.78	722.84	1.04924	1.81357	17.449
	Petrosimonia sibirica	525.43	0.215202	556.6	14.0518	641.32	15.8794	722.84	0.713875	2.08404	19.3422
	Petrosimonia sibirica	525.43	0.264629	556.6	20.1593	641.32	15.5171	722.84	0.921375	1.72597	18.3367
	Petrosimonia sibirica	525.43	0.310216	556.6	18.9536	641.32	15.2362	722.84	1.00734	1.8946	17.2936
	Petrosimonia sibirica	525.43	0.257899	556.6	17.7285	641.32	14.3978	722.84	0.888798	1.92895	20.851
	Petrosimonia sibirica	525.43	0.263653	556.6	14.7811	641.32	14.1599	722.84	0.841038	1.81802	18.6544
	Petrosimonia sibirica	525.43	0.25052	556.6	12.2097	641.32	13.8656	722.84	1.4126	1.90208	18.0382
	Petrosimonia sibirica	525.43	0.228214	556.6	15.2808	641.32	16.4837	722.84	0.871234	1.88285	19.4704
	Petrosimonia sibirica	525.43	0.262615	556.6	18.0512	641.32	13.7261	722.84	1.24906	2.2057	18.3809
	Petrosimonia sibirica	525.43	0.280909	556.6	18.6912	641.32	11.5528	722.84	0.933897	1.8445	17.2012
	Petrosimonia sibirica	525.43	0.269218	556.6	17.9849	641.32	10.9184	722.84	0.895599	1.70523	16.2201
	Petrosimonia sibirica	525.43	0.32828	556.6	15.0308	641.32	12.9788	722.84	1.01616	1.43668	13.8547
	Petrosimonia sibirica	525.43	0.273413	556.6	16.7239	641.32	19.2598	722.84	1.06467	1.37648	11.4323
	Petrosimonia sibirica	525.43	0.310492	556.6	18.381	641.32	11.6479	722.84	0.865831	1.936	17.3517
	Petrosimonia sibirica	525.43	0.320244	556.6	13.3567	641.32	10.1001	722.84	0.844988	1.43339	11.9776
	Petrosimonia sibirica	525.43	0.291954	556.6	11.9603	641.32	9.11038	722.84	1.03751	1.67495	15.4604
	Petrosimonia sibirica	525.43	0.256139	556.6	10.3831	641.32	8.89786	722.84	0.873913	1.56935	13.7909
	Petrosimonia sibirica	525.43	0.163883	556.6	9.09676	641.32	7.05722	722.84	0.999026	1.29321	10.8798
	Petrosimonia sibirica	525.43	0.194272	556.6	8.6688	641.32	6.11205	722.84	0.987359	1.23479	11.5866
	Petrosimonia sibirica	525.43	0.18749	556.6	10.3297	641.32	5.47629	722.84	0.893768	0.967092	14.3216
	Petrosimonia sibirica	525.43	0.202025	556.6	12.3306	641.32	10.1221	722.84	0.901327	0.927629	14.0578
	Petrosimonia sibirica	525.43	0.152621	556.6	15.4114	641.32	7.86688	722.84	0.798222	1.1731	14.9023
	Petrosimonia sibirica	525.43	0.145841	556.6	14.9088	641.32	7.69611	722.84	0.949052	0.951563	9.75113
	Petrosimonia sibirica	525.43	0.158594	556.6	9.47126	641.32	8.74621	722.84	0.816806	0.774904	8.62853
	Petrosimonia sibirica	525.43	0.15828	556.6	11.1846	641.32	8.2154	722.84	0.728601	1.08046	13.5886
	Petrosimonia sibirica	525.43	0.177314	556.6	8.52975	641.32	5.85122	722.84	0.723609	1.25828	16.0982
	Petrosimonia sibirica	525.43	0.196871	556.6	7.96407	641.32	7.22208	722.84	1.04402	1.17697	14.9862
	Petrosimonia sibirica	525.43	0.189664	556.6	12.3525	641.32	9.0424	722.84	0.916032	0.904159	11.983
	Petrosimonia sibirica	525.43	0.134898	556.6	12.8301	641.32	7.99113	722.84	0.791133	1.01944	12.1019
	Petrosimonia sibirica	525.43	0.141476	556.6	12.9085	641.32	6.7475	722.84	0.757565	1.13827	12.5882
	Petrosimonia sibirica	525.43	0.182145	556.6	10.4103	641.32	5.49399	722.84	0.849375	0.934458	11.7612
	Petrosimonia sibirica	525.43	0.14544	556.6	15.1311	641.32	7.84724	722.84	0.989998	1.01625	13.7742
	Petrosimonia sibirica	525.43	0.162351	556.6	13.9536	641.32	11.7493	722.84	0.978806	0.69836	8.9537
	Petrosimonia sibirica	525.43	0.149288	556.6	19.553	641.32	9.90497	722.84	1.31089	0.845648	11.2186
	Petrosimonia sibirica	525.43	0.167216	556.6	13.2681	641.32	7.12636	722.84	1.02145	1.37321	14.3991
	Petrosimonia sibirica	525.43	0.189599	556.6	18.6183	641.32	9.42599	722.84	1.17878	1.6305	15.1985
	Petrosimonia sibirica	525.43	0.134415	556.6	14.0693	641.32	7.40658	722.84	1.30756	1.06136	15.2178
	Petrosimonia sibirica	525.43	0.184186	556.6	15.5907	641.32	8.9208	722.84	1.46426	1.16889	12.4065
	Petrosimonia sibirica	525.43	0.160875	556.6	13.272	641.32	7.5043	722.84	1.12458	1.02368	12.5331
	Petrosimonia sibirica	525.43	0.189657	556.6	15.3445	641.32	12.0853	722.84	1.22161	0.959918	12.4731
	Petrosimonia sibirica	525.43	0.160143	556.6	15.3858	641.32	11.6105	722.84	1.29538	0.747036	7.76625
	Petrosimonia sibirica	525.43	0.205855	556.6	17.9648	641.32	10.3577	722.84	1.06595	1.6261	15.5595
	Petrosimonia sibirica	525.43	0.130109	556.6	18.5406	641.32	6.30831	722.84	1.26007	0.976291	12.7378
	Petrosimonia sibirica	525.43	0.144184	556.6	12.1107	641.32	7.53729	722.84	1.06065	1.06739	12.5307
	Petrosimonia sibirica	525.43	0.115748	556.6	13.4683	641.32	6.0912	722.84	1.09248	0.671205	9.05149
	Petrosimonia sibirica	525.43	0.150909	556.6	14.696	641.32	8.10559	722.84	0.467105	0.883498	11.474
	Petrosimonia sibirica	525.43	0.150315	556.6	10.4119	641.32	11.1075	725.59	0.519157	0.804109	9.88648
	Petrosimonia sibirica	525.43	0.103014	556.6	12.9687	641.32	6.44644	725.59	0.885722	0.795376	9.39897
	Petrosimonia sibirica	525.43	0.12694	556.6	15.2326	641.32	7.48506	725.59	0.799024	0.893173	10.5517
	Petrosimonia sibirica	525.43	0.123191	556.6	21.6405	641.32	9.48596	725.59	1.31205	0.702845	8.94047
	Petrosimonia sibirica	525.43	0.131989	556.6	14.6446	641.32	7.3589	725.59	0.792589	0.633599	8.12317
	Petrosimonia sibirica	525.43	0.136077	556.6	17.8149	641.32	8.6925	725.59	0.670272	1.01374	12.1118
	Petrosimonia sibirica	525.43	0.143907	556.6	16.717	641.32	7.91888	725.59	0.893427	0.67586	9.65213
	Petrosimonia sibirica	525.43	0.102711	556.6	12.62	641.32	7.9564	725.59	1.16658	0.823129	8.88009
	Petrosimonia sibirica	525.43	0.107829	556.6	14.7944	641.32	7.8594	725.59	0.718335	0.714407	8.40424
	Petrosimonia sibirica	525.43	0.154528	556.6	19.1866	641.32	6.8834	725.59	0.858403	0.777745	9.71065
	Petrosimonia sibirica	525.43	0.148207	556.6	12.8911	641.32	6.77753	725.59	0.79575	0.733651	9.07567
	Petrosimonia sibirica	525.43	0.176424	556.6	13.6463	641.32	7.67068	725.59	0.89599	1.22935	14.8982
	Petrosimonia sibirica	525.43	0.133925	556.6	16.5672	641.32	11.1388	725.59	0.68897	0.783067	10.0064
	Petrosimonia sibirica	525.43	0.10084	556.6	13.4282	641.32	9.93203	728.34	0.80072	0.748875	8.70458
	Petrosimonia sibirica	525.43	0.1469	556.6	14.6185	641.32	7.16105	728.34	0.902444	0.865934	11.0213
	Petrosimonia sibirica	525.43	0.164423	556.6	11.0592	641.32	7.32208	728.34	0.977272	0.87697	8.90593
	Petrosimonia sibirica	525.43	0.138465	556.6	14.3712	641.32	7.00912	728.34	0.91796	0.741693	9.20956
	Petrosimonia sibirica	525.43	0.137818	559.22	14.7361	641.32	7.53299	728.34	0.934861	0.656017	9.34619
	Petrosimonia sibirica	525.43	0.108718	559.22	19.3079	641.32	8.3049	728.34	1.0718	0.811262	9.51333
	Petrosimonia sibirica	525.43	0.122715	559.22	14.668	641.32	5.45993	728.34	0.985032	0.637051	9.30236
	Petrosimonia sibirica	525.43	0.114645	559.22	15.5375	641.32	7.2704	728.34	0.803058	0.692984	9.97074
	Petrosimonia sibirica	525.43	0.120355	559.22	16.3555	641.32	7.81223	728.34	0.838125	0.569704	7.98312
	Petrosimonia sibirica	525.43	0.208816	559.22	17.7095	641.32	8.12103	728.34	1.04403	1.02368	14.3966
	Petrosimonia sibirica	525.43	0.112662	559.22	17.8071	641.32	7.9368	728.34	1.01713	0.532828	8.07076
	Petrosimonia sibirica	525.43	0.135164	559.22	17.3626	641.32	5.59414	728.34	1.00512	0.600996	8.42474
	Petrosimonia sibirica	525.43	0.147162	559.22	20.4711	641.32	6.87662	728.34	0.81249	0.749205	9.67268
	Petrosimonia sibirica	525.43	0.145881	559.22	18.011	641.32	5.72148	728.34	0.713921	0.683702	10.0956
	Petrosimonia sibirica	525.43	0.124111	559.22	15.779	641.32	6.10539	728.34	0.714671	0.613724	9.2278
	Petrosimonia sibirica	525.43	0.114621	559.22	20.2039	641.32	12.7334	728.34	0.70703	0.677737	9.45847
	Petrosimonia sibirica	525.43	0.092149	559.22	13.9485	641.32	6.91987	728.34	0.233052	0.684015	8.60913
	Petrosimonia sibirica	525.43	0.0804542	559.22	22.7964	641.32	5.17343	728.34	0.777087	0.533056	7.41046
	Petrosimonia sibirica	525.43	0.11329	559.22	17.6545	641.32	4.37103	728.34	0.710395	0.61902	9.17022
	Petrosimonia sibirica	525.43	0.105278	559.22	19.8547	641.32	7.4185	728.34	1.07326	0.63307	8.67039
	Petrosimonia sibirica	525.43	0.281119	559.22	17.8711	641.32	6.90815	728.34	1.08968	1.72469	17.4435
	Petrosimonia sibirica	525.43	0.138118	559.22	22.9601	641.32	7.23312	728.34	1.01492	0.786528	10.7952
	Petrosimonia sibirica	525.43	0.106175	559.22	19.5917	641.32	7.33676	728.34	0.971528	0.627046	8.83649
	Petrosimonia sibirica	525.43	0.0950125	559.22	19.3015	641.32	6.23775	728.34	0.958728	0.537629	5.94653
	Petrosimonia sibirica	525.43	0.103541	559.22	19.4036	641.32	7.34779	728.34	1.063	0.732734	7.70196
	Petrosimonia sibirica	525.43	0.125612	559.22	17.0109	641.32	6.82473	728.34	1.01958	0.63221	8.13917
	Petrosimonia sibirica	525.43	0.11431	559.22	16.9182	641.32	7.25763	728.34	0.492474	0.649999	9.58515
	Petrosimonia sibirica	525.43	0.0998998	559.22	18.947	641.32	5.791	728.34	1.23139	0.624997	9.11069
	Petrosimonia sibirica	525.43	0.115186	559.22	18.6354	641.32	8.98415	728.34	0.752103	0.654233	9.5977
	Petrosimonia sibirica	525.43	0.0864444	559.22	16.1584	641.32	10.248	728.34	0.681206	0.643826	8.4159
	Petrosimonia sibirica	525.43	0.125905	559.22	15.8013	641.32	7.59104	728.34	0.753492	0.69447	9.83524
	Petrosimonia sibirica	525.43	0.176872	559.22	18.5072	641.32	8.92359	728.34	0.879915	0.933844	10.1506
	Petrosimonia sibirica	525.43	0.108199	559.22	22.3634	641.32	12.0861	728.34	0.870897	0.616189	8.4955
	Petrosimonia sibirica	525.43	0.231657	559.22	17.6652	641.32	9.33101	731.1	0.618917	1.25042	14.8402
	Petrosimonia sibirica	525.43	0.226512	559.22	15.3205	641.32	8.76927	731.1	0.445845	1.28731	16.4545
	Petrosimonia sibirica	525.43	0.188306	559.22	15.0533	641.32	9.81337	733.86	0.574202	1.34826	15.8791
	Petrosimonia sibirica	525.43	0.209609	559.22	19.5406	641.32	9.0996	733.86	0.545569	1.27312	15.7351
	Petrosimonia sibirica	525.43	0.233517	559.22	19.0227	641.32	9.24956	733.86	0.495651	1.04468	11.7166
	Petrosimonia sibirica	525.43	0.263782	559.22	13.5053	641.32	11.1769	733.86	0.439337	1.70495	15.6964
	Petrosimonia sibirica	525.43	0.235052	559.22	19.1479	641.32	10.1411	733.86	0.801823	1.12258	16.327
	Petrosimonia sibirica	525.43	0.186142	559.22	18.3313	641.32	7.2515	733.86	0.769006	1.45741	14.4446
	Petrosimonia sibirica	525.43	0.251385	559.22	11.938	641.32	14.0633	733.86	1.12332	1.16251	15.2122
	Petrosimonia sibirica	525.43	0.215156	559.22	24.0544	641.32	11.6868	733.86	0.965887	1.24508	15.3775
	Petrosimonia sibirica	525.43	0.261021	559.22	17.5566	641.32	13.7432	733.86	1.06999	1.3694	15.8371
	Petrosimonia sibirica	525.43	0.314625	559.22	15.5997	641.32	13.256	733.86	0.95045	1.60856	19.3331
	Petrosimonia sibirica	525.43	0.191208	559.22	20.0117	641.32	7.01193	733.86	1.07542	1.36496	15.5588
	Petrosimonia sibirica	525.43	0.199986	559.22	18.8255	641.32	11.4684	733.86	0.818093	1.02471	12.6048
	Petrosimonia sibirica	525.43	0.324817	559.22	23.1272	641.32	12.6052	733.86	0.886712	1.96558	17.8845
	Petrosimonia sibirica	525.43	0.25198	559.22	18.1632	641.32	11.935	733.86	0.855226	1.44514	15.7414
	Petrosimonia sibirica	525.43	0.217411	559.22	12.844	641.32	12.2939	733.86	0.777988	1.65308	15.2087
	Petrosimonia sibirica	525.43	0.141864	559.22	17.6472	641.32	13.3045	733.86	0.596042	2.05955	19.7923
	Petrosimonia sibirica	525.43	0.254312	559.22	18.0913	641.32	8.45782	733.86	0.734825	1.28714	12.0821
	Petrosimonia sibirica	525.43	0.24954	559.22	17.6128	641.32	11.7053	736.62	0.836069	1.49307	14.5213
	Petrosimonia sibirica	525.43	0.19629	559.22	17.4647	641.32	13.2485	739.38	0.620808	1.69471	15.9407
	Petrosimonia sibirica	525.43	0.197504	559.22	19.8984	641.32	11.3823	742.14	1.04326	1.40724	14.8184
	Petrosimonia sibirica	525.43	0.297099	559.22	18.1371	641.32	10.5432	742.14	0.890159	1.39254	14.2551
	Petrosimonia sibirica	525.43	0.218584	559.22	21.0592	641.32	13.0561	742.14	0.353383	1.76613	18.0047
	Petrosimonia sibirica	525.43	0.262986	559.22	18.0253	641.32	13.2589	742.14	0.738429	1.12614	12.8898
	Petrosimonia sibirica	525.43	0.291179	559.22	20.6761	641.32	11.0649	742.14	0.237484	1.36164	16.944
	Petrosimonia sibirica	525.43	0.210984	559.22	17.3241	641.32	11.5719	744.91	0.492972	1.47865	15.2112
	Petrosimonia sibirica	525.43	0.199489	559.22	18.9449	641.32	11.1224	744.91	0.811383	1.43024	15.3242
	Petrosimonia sibirica	525.43	0.2538	559.22	19.6957	641.32	11.4771	744.91	0.725992	1.19605	13.3804
	Petrosimonia sibirica	525.43	0.270675	559.22	19.8056	641.32	11.2623	744.91	0.796825	1.56192	16.2537
	Petrosimonia sibirica	525.43	0.245405	559.22	19.2767	641.32	13.9535	744.91	1.32457	1.7043	16.0155
	Petrosimonia sibirica	525.43	0.196726	559.22	19.3624	641.32	9.90506	744.91	1.22428	1.20607	13.1769
	Petrosimonia sibirica	525.43	0.194438	559.22	22.2587	641.32	10.3356	744.91	1.24934	1.19368	13.1315
	Petrosimonia sibirica	525.43	0.251089	559.22	18.3544	641.32	9.21139	744.91	0.982157	1.38436	14.1839
	Petrosimonia sibirica	525.43	0.196629	559.22	15.2518	641.32	10.6721	744.91	1.09982	1.51634	16.7018
	Petrosimonia sibirica	525.43	0.338935	559.22	13.7408	641.32	14.2372	744.91	1.28399	1.19679	13.1841
	Petrosimonia sibirica	525.43	0.244794	559.22	16.7295	641.32	10.1215	744.91	0.616135	1.88632	14.5578
	Petrosimonia sibirica	525.43	0.258343	559.22	21.5452	641.32	9.69549	744.91	1.49024	1.41382	16.7619
	Petrosimonia sibirica	525.43	0.225362	559.22	14.8602	641.32	9.25953	744.91	0.502516	1.4354	17.0367
	Petrosimonia sibirica	525.43	0.202667	559.22	14.7212	641.32	9.56185	744.91	0.795452	1.38362	16.9664
	Petrosimonia sibirica	525.43	0.21854	559.22	11.6031	641.32	11.3607	744.91	1.26042	1.20518	13.3682
	Petrosimonia sibirica	525.43	0.186355	559.22	11.5794	641.32	7.23007	744.91	1.14723	1.62598	14.3936
	Petrosimonia sibirica	525.43	0.186687	559.22	9.2582	641.32	10.9098	744.91	1.06117	1.42764	15.1639
	Petrosimonia sibirica	525.43	0.214761	559.22	10.731	641.32	10.6267	744.91	1.3059	1.10633	11.9099
	Petrosimonia sibirica	525.43	0.190471	559.22	12.202	641.32	8.03835	744.91	1.31295	1.08577	12.7268
	Petrosimonia sibirica	525.43	0.215014	559.22	10.8247	641.32	12.0554	744.91	1.23543	1.12883	12.1262
	Petrosimonia sibirica	525.43	0.151336	559.22	7.87081	641.32	11.3747	744.91	1.12883	1.3823	16.4009
	Petrosimonia sibirica	525.43	0.235522	559.22	12.4969	641.32	9.62819	744.91	1.08149	1.14906	11.5991
	Petrosimonia sibirica	525.43	0.154466	559.22	10.2546	641.32	7.07946	744.91	0.856873	1.22511	12.9761
	Petrosimonia sibirica	525.43	0.194417	559.22	11.3836	641.32	9.2585	744.91	1.09008	1.28786	12.9215
	Petrosimonia sibirica	525.43	0.267381	559.22	16.2767	641.32	10.5187	744.91	0.94302	1.02564	11.2484
	Petrosimonia sibirica	525.43	0.21449	559.22	13.1831	641.32	9.81207	744.91	0.917812	1.57275	17.1389
	Petrosimonia sibirica	525.43	0.198296	559.22	7.94147	641.32	15.038	744.91	1.1655	1.46393	14.9369
	Petrosimonia sibirica	525.43	0.180439	559.22	9.8442	641.32	11.4149	744.91	0.746603	1.15451	12.4684
	Petrosimonia sibirica	525.43	0.17434	559.22	8.21454	641.32	13.9126	744.91	1.14943	0.883238	11.5978
	Petrosimonia sibirica	525.43	0.212133	559.22	9.87112	641.32	9.29222	744.91	0.713192	1.03716	11.2351
	Petrosimonia sibirica	525.43	0.189262	559.22	12.5998	641.32	10.4031	744.91	1.60436	1.30576	14.0375
	Petrosimonia sibirica	525.43	0.27145	559.22	8.65935	641.32	13.5795	744.91	1.04273	1.11767	12.2354
	Petrosimonia sibirica	525.43	0.209887	559.22	11.5333	641.32	12.3628	744.91	0.919784	1.94664	15.836
	Petrosimonia sibirica	525.43	0.356349	559.22	9.21278	641.32	11.3906	744.91	0.457663	1.34693	15.7034
	Petrosimonia sibirica	525.43	0.225211	559.22	9.96066	641.32	15.4081	744.91	1.02619	2.1335	21.0789
	Petrosimonia sibirica	525.43	0.277111	559.22	9.29234	641.32	9.74878	744.91	1.04784	1.45476	17.9357
	Petrosimonia sibirica	525.43	0.370367	559.22	10.2069	641.32	10.98	744.91	1.02495	1.68089	19.8211
	Petrosimonia sibirica	525.43	0.289236	559.22	8.87011	641.32	16.7822	744.91	0.64649	2.30263	22.7747
	Petrosimonia sibirica	525.43	0.280081	559.22	9.93631	641.32	12.1192	744.91	0.677982	1.89275	22.8099
	Petrosimonia sibirica	525.43	0.277484	559.22	8.76184	641.32	11.5247	744.91	0.840877	1.71033	18.536
	Petrosimonia sibirica	525.43	0.269339	559.22	6.90385	641.32	11.4587	744.91	0.969208	2.10938	23.3047
	Petrosimonia sibirica	525.43	0.259667	559.22	9.46393	641.32	14.6063	744.91	0.885831	1.62047	17.9835
	Petrosimonia sibirica	525.43	0.448149	559.22	7.37092	641.32	11.8649	744.91	0.723419	1.69355	22.3647
	Petrosimonia sibirica	525.43	0.304925	559.22	17.4296	641.32	9.47192	744.91	0.513004	3.09616	26.0405
	Petrosimonia sibirica	525.43	0.203563	559.22	8.99023	641.32	12.2015	744.91	0.851405	1.92481	20.53
	Petrosimonia sibirica	525.43	0.277373	559.22	6.97386	641.32	11.0168	744.91	0.688204	1.56184	17.0346
	Petrosimonia sibirica	525.43	0.309367	559.22	5.68252	641.32	13.2553	744.91	0.72353	1.81361	22.4654
	Petrosimonia sibirica	525.43	0.282133	559.22	8.86514	641.32	9.63055	744.91	0.650405	1.9757	19.1624
	Petrosimonia sibirica	525.43	0.250361	559.22	8.25148	641.32	11.4682	744.91	0.760907	1.84757	23.0882
	Petrosimonia sibirica	525.43	0.25029	559.22	8.81507	641.32	9.56886	744.91	0.89944	1.54391	17.5922
	Petrosimonia sibirica	525.43	0.280044	559.22	8.96007	641.32	10.3682	744.91	0.510865	1.67104	17.5508
	Petrosimonia sibirica	525.43	0.314935	559.22	7.47277	641.32	8.45076	744.91	1.10879	1.72857	17.8369
	Petrosimonia sibirica	525.43	0.32426	559.22	14.3629	641.32	8.49111	744.91	1.01005	1.93959	16.8897
	Petrosimonia sibirica	525.43	0.138693	559.22	16.996	641.32	7.18588	744.91	0.926448	2.1095	21.18
	Petrosimonia sibirica	525.43	0.317347	559.22	13.1642	641.32	8.88737	744.91	0.56198	1.08305	9.03776
	Petrosimonia sibirica	525.43	0.228101	559.22	14.2394	641.32	13.4049	744.91	0.662571	1.65841	16.8565
	Petrosimonia sibirica	525.43	0.178398	559.22	19.9367	641.32	10.7407	744.91	0.690617	1.26697	13.1627
	Petrosimonia sibirica	525.43	0.247813	559.22	15.6199	641.32	11.9627	744.91	0.781095	1.41967	13.6076
	Petrosimonia sibirica	525.43	0.280931	559.22	18.3522	641.32	17.2305	744.91	0.568651	1.33952	12.9774
	Petrosimonia sibirica	525.43	0.188653	559.22	17.803	641.32	9.6826	744.91	0.640679	1.41448	14.9647
	Petrosimonia sibirica	525.43	0.22839	559.22	15.3832	641.32	11.5375	744.91	0.884802	1.71912	16.2416
	Petrosimonia sibirica	525.43	0.22849	559.22	15.3759	641.32	13.6578	744.91	0.341173	1.13246	14.1079
	Petrosimonia sibirica	525.43	0.16195	559.22	15.4848	641.32	8.43282	744.91	0.656972	1.48376	15.1392
	Petrosimonia sibirica	525.43	0.178161	559.22	16.3424	641.32	15.4134	744.91	0.742546	1.37986	15.7932
	Petrosimonia sibirica	525.43	0.248248	559.22	16.4953	641.32	13.9068	744.91	0.896548	1.77672	16.0712
	Petrosimonia sibirica	525.43	0.138683	559.22	18.2268	641.32	12.2283	744.91	0.366734	1.40089	9.38342
	Petrosimonia sibirica	525.43	0.202579	559.22	16.2791	641.32	8.80702	744.91	0.634716	1.66538	13.4548
	Petrosimonia sibirica	525.43	0.216214	559.22	14.8176	641.32	9.42385	744.91	0.729851	2.09924	16.6571
	Petrosimonia sibirica	525.43	0.285456	559.22	12.2082	641.32	11.6961	744.91	0.72003	1.90999	14.4878
	Petrosimonia sibirica	525.43	0.255554	559.22	12.2154	641.32	9.3393	744.91	0.695345	1.40638	8.42192
	Petrosimonia sibirica	525.43	0.272141	559.22	13.6411	641.32	19.4689	744.91	0.685355	1.58845	11.0447
	Petrosimonia sibirica	525.43	0.328954	559.22	16.7697	641.32	10.8629	744.91	0.704234	1.44559	11.8746
	Petrosimonia sibirica	525.43	0.225304	559.22	12.5324	641.32	10.8054	744.91	0.770389	1.74575	12.6773
	Petrosimonia sibirica	525.43	0.213859	559.22	9.51089	641.32	12.1396	744.91	0.948317	1.57459	11.3264
	Petrosimonia sibirica	525.43	0.230458	559.22	11.7997	641.32	6.16251	744.91	0.683768	1.3534	10.6689
	Petrosimonia sibirica	525.43	0.224728	559.22	12.3937	641.32	7.70553	744.91	0.649563	1.70812	14.4295
	Petrosimonia sibirica	525.43	0.130434	559.22	20.0359	641.32	7.04133	744.91	0.708278	1.73306	11.9592
	Petrosimonia sibirica	525.43	0.128778	559.22	20.0306	641.32	7.38104	744.91	0.745304	1.15023	9.11489
	Petrosimonia sibirica	525.43	0.200439	559.22	15.7318	644.01	12.9593	744.91	0.621458	0.745589	5.33448
	Petrosimonia sibirica	525.43	0.122609	559.22	15.9927	644.01	8.2202	744.91	0.575593	1.62798	8.84904
	Petrosimonia sibirica	525.43	0.184221	559.22	15.4718	644.01	8.75623	744.91	0.72346	1.73513	11.4693
	Petrosimonia sibirica	525.43	0.299966	559.22	16.8713	644.01	6.45904	744.91	0.614319	1.75296	11.9614
	Petrosimonia sibirica	525.43	0.176904	559.22	19.7089	644.01	5.41921	744.91	0.656423	2.15717	16.2363
	Petrosimonia sibirica	525.43	0.188808	559.22	14.1164	644.01	10.6157	744.91	1.026	1.53979	12.0913
	Petrosimonia sibirica	525.43	0.205651	559.22	14.3986	644.01	13.1278	744.91	0.777772	1.40728	14.7353
	Petrosimonia sibirica	528.01	0.150528	559.22	15.1651	644.01	9.42132	744.91	0.558054	1.66572	12.9892
	Petrosimonia sibirica	528.01	0.150103	559.22	16.8347	644.01	8.94379	744.91	0.345841	1.64748	14.2637
	Petrosimonia sibirica	528.01	0.131456	559.22	17.7987	644.01	10.4669	744.91	0.602216	1.42158	15.489
	Petrosimonia sibirica	528.01	0.137932	559.22	14.8641	644.01	11.5356	744.91	0.710522	1.53071	14.4142
	Petrosimonia sibirica	528.01	0.233105	559.22	15.717	644.01	11.9298	744.91	0.738163	2.72741	15.1854
	Petrosimonia sibirica	530.6	0.0904597	559.22	18.3634	644.01	11.5649	744.91	0.694944	1.43335	11.3189
	Petrosimonia sibirica	530.6	0.125429	559.22	14.6044	644.01	11.368	744.91	0.634873	1.59409	13.3527
	Petrosimonia sibirica	530.6	0.106399	559.22	8.94114	644.01	9.03186	744.91	0.593958	1.31209	13.522
	Petrosimonia sibirica	530.6	0.138264	559.22	19.2382	644.01	10.6958	744.91	0.959323	1.55344	14.4862
	Petrosimonia sibirica	530.6	0.154325	559.22	16.8619	644.01	13.6177	744.91	1.07056	0.965728	9.14707
	Petrosimonia sibirica	530.6	0.177724	559.22	16.0235	644.01	11.2768	744.91	1.05809	1.44102	12.4621
	Petrosimonia sibirica	530.6	0.24474	559.22	26.5004	644.01	12.3872	744.91	0.767843	1.13045	11.3041
	Petrosimonia sibirica	530.6	0.196355	559.22	13.5012	644.01	11.0311	744.91	0.768587	1.12716	11.6375
	Petrosimonia sibirica	530.6	0.162607	559.22	18.2248	644.01	11.4669	744.91	0.884885	1.15573	9.96948
	Petrosimonia sibirica	530.6	0.252637	559.22	8.52621	644.01	8.21076	744.91	0.837827	1.06321	9.8177
	Petrosimonia sibirica	530.6	0.0604173	559.22	15.0248	644.01	7.78537	744.91	0.681752	0.994316	12.4235
	Petrosimonia sibirica	530.6	0.206998	559.22	9.93647	644.01	9.89717	744.91	1.42111	1.4084	11.713
	Petrosimonia sibirica	530.6	0.234194	559.22	9.71176	644.01	9.28627	744.91	1.09158	0.967241	10.846
	Petrosimonia sibirica	530.6	0.113788	559.22	12.9411	644.01	10.6642	744.91	1.40891	1.18463	13.2216
	Petrosimonia sibirica	530.6	0.123498	559.22	14.7013	665.57	9.93484	744.91	1.13376	1.4749	12.634
	Bare land	489.46	0.0433861	512.53	17.5737	695.44	27.2803	684.55	0.0794819	0.376392	0.62931
	Bare land	489.46	0.0581062	556.6	5.18167	695.44	17.849	687.27	0.0497456	0.352783	0.517619
	Bare land	489.46	0.0553081	556.61	8.08515	695.44	18.8487	687.27	0.0869516	0.588808	-0.0747258
	Bare land	489.46	0.0764919	556.62	9.40166	698.17	19.563	687.27	0.0796431	0.3316	0.675087
	Bare land	489.46	0.0571377	556.63	6.17823	698.17	18.8802	687.27	0.070619	0.388332	0.642952
	Bare land	489.46	0.0741694	559.22	8.71109	698.17	17.0985	687.27	0.0774395	0.199606	0.463283
	Bare land	489.46	0.0883343	559.23	11.3587	698.17	12.1928	687.27	0.0693226	0.362361	0.629382
	Bare land	489.46	0.0966996	559.24	13.4057	698.17	16.7582	687.27	0.0569677	0.894839	0.413333
	Bare land	489.46	0.0718679	559.25	8.66719	698.17	30.5861	689.99	0.121938	0.441432	0.776647
	Bare land	489.46	0.0843528	559.26	11.0394	698.17	21.2136	689.99	0.114506	0.298742	0.3968
	Bare land	489.46	0.0950403	559.27	8.2821	698.17	20.8748	689.99	0.112429	0.294526	1.17812
	Bare land	489.46	0.0457752	559.28	7.99878	698.17	11.5186	689.99	0.150183	0.32855	0.832567
	Bare land	489.46	0.0983992	559.29	15.8256	698.17	12.1337	689.99	0.157758	0.536384	1.21468
	Bare land	489.46	0.0797038	559.3	10.5274	698.17	11.3005	689.99	0.0910887	0.384583	0.778846
	Bare land	489.46	0.060953	559.31	7.73988	698.17	17.3488	689.99	0.0905544	0.648008	1.00938
	Bare land	489.46	0.12178	559.32	15.8841	698.17	22.0504	689.99	0.121823	0.613633	1.38525
	Bare land	489.46	0.0728331	559.33	8.60191	698.17	14.9623	689.99	0.0964577	0.682622	0.94654
	Bare land	489.46	0.119393	559.34	10.8113	698.17	19.08	692.71	0.133792	0.496478	0.796417
	Bare land	489.46	0.0709214	559.35	7.54053	698.17	16.1975	692.71	0.168508	0.464751	0.892865
	Bare land	489.46	0.129897	559.36	16.0487	698.17	18.2234	692.71	0.149308	0.585174	1.36307
	Bare land	489.46	0.0936585	559.37	11.6568	698.17	14.2088	692.71	0.180633	0.734133	0.866357
	Bare land	489.46	0.084125	559.38	12.9965	700.9	17.1057	692.71	0.22697	0.091873	1.79681
	Bare land	489.46	0.142212	559.39	10.5965	700.9	19.3656	692.71	0.119486	0.437601	1.17459
	Bare land	489.46	0.0971179	559.4	10.8473	700.9	23.9743	692.71	0.151774	0.628716	0.89331
	Bare land	489.46	0.0681284	559.41	11.5262	700.9	16.4122	692.71	0.0596492	0.732569	1.04992
	Bare land	489.46	0.0343431	559.42	13.805	700.9	16.9965	692.71	0.132911	0.491274	0.727048
	Bare land	489.46	0.0650853	559.43	9.91472	703.64	20.7711	692.71	0.11751	0.472239	0.873784
	Bare land	489.46	0.0662784	559.44	12.6616	703.64	25.7199	692.71	0.208726	0.629415	0.0514375
	Bare land	489.46	0.0893407	559.45	14.1418	703.64	25.1542	692.71	0.230063	0.610726	1.41181
	Bare land	489.46	0.0875357	559.46	11.9846	703.64	18.3679	692.71	0.160907	0.728641	1.44108
	Bare land	489.46	0.105264	559.47	10.678	703.64	26.362	692.71	0.154958	0.575228	0.569417
	Bare land	489.46	0.0645169	559.48	12.3475	706.37	12.3382	692.71	0.195629	0.921103	2.25669
	Bare land	489.46	0.0637627	559.49	11.3884	709.11	20.6686	692.71	0.119808	0.519172	1.10064
	Bare land	489.46	0.0886048	559.5	15.0299	709.11	23.2156	692.71	0.14925	0.401646	0.955484
	Bare land	489.46	0.0968165	559.51	13.155	709.11	22.9741	692.71	0.0946048	0.548957	0.945879
	Bare land	489.46	0.0446159	559.52	18.3546	711.85	22.6497	692.71	0.0932016	0.735976	2.65408
	Bare land	489.46	0.0503669	559.53	11.2971	711.85	19.5316	692.71	0.0895161	0.257622	0.922385
	Bare land	489.46	0.119472	559.54	10.0958	711.85	18.6142	692.71	0.150692	0.626192	0.660768
	Bare land	489.46	0.0942911	559.55	11.6467	711.85	19.0082	692.71	0.188532	0.462739	0.47171
	Bare land	489.46	0.117369	559.56	11.9067	711.85	19.9801	692.71	0.0977137	0.750865	1.90694
	Bare land	489.46	0.0652964	559.57	4.94058	711.85	17.0745	692.71	0.127942	0.94154	1.39079
	Bare land	489.46	0.116993	559.58	13.9615	711.85	29.1757	692.71	0.175766	0.769393	0.156562
	Bare land	489.46	0.133517	559.59	10.3821	711.85	25.4274	692.71	0.211667	0.5603	0.770821
	Bare land	489.46	0.121456	559.6	13.0181	711.85	24.6954	692.71	0.228903	0.613411	0.292438
	Bare land	489.46	0.0357262	559.61	19.445	711.85	17.0927	692.71	0.154571	1.13285	1.05163
	Bare land	492.02	0.0366597	559.62	14.0763	711.85	17.3896	692.71	0.20306	1.02558	0.598679
	Bare land	492.02	0.0416722	559.63	12.4058	711.85	19.2738	692.71	0.161258	0.970847	0.324504
	Bare land	492.02	0.173046	559.64	12.4056	711.85	11.4677	692.71	0.105438	0.447234	0.0915827
	Bare land	492.02	0.0742486	559.65	21.2343	711.85	9.75965	692.71	0.141353	0.870893	1.02453
	Bare land	492.02	0.0954536	559.66	17.925	711.85	19.5609	692.71	0.293123	0.360225	0.085625
	Bare land	492.02	0.13727	559.67	17.4959	711.85	19.621	692.71	0.0899738	0.354287	0.713655
	Bare land	492.02	0.0709173	559.68	12.3188	711.85	23.9357	692.71	0.171323	0.541064	0.954696
	Bare land	492.02	0.0504994	559.69	16.3523	711.85	25.0609	692.71	0.1805	0.565373	0.403167
	Bare land	492.02	0.100899	559.7	8.85021	711.85	15.3902	692.71	0.176629	0.693385	2.69145
	Bare land	492.02	0.0823778	559.71	9.2258	711.85	17.0081	692.71	0.108647	0.562921	1.30216
	Bare land	492.02	0.0438895	559.72	10.5132	711.85	14.7643	692.71	0.132825	0.583757	0.919482
	Bare land	492.02	0.0963347	559.73	11.4828	711.85	13.9347	692.71	0.104925	0.656161	-0.00127621
	Bare land	492.02	0.0930464	559.74	14.1594	711.85	16.8068	695.44	0.11245	0.370183	0.941063
	Bare land	492.02	0.188347	559.75	11.7478	711.85	26.8071	695.44	0.343631	0.872909	0.944403
	Bare land	492.02	0.209083	559.76	11.0696	711.85	15.9685	695.44	0.410631	0.855804	0.591659
	Bare land	492.02	0.0673901	559.77	11.311	711.85	29.1062	695.44	0.107447	0.534318	0.662512
	Bare land	492.02	0.0721925	559.78	8.30441	711.85	22.5804	695.44	0.187026	1.11107	0.95131
	Bare land	492.02	0.0815554	559.79	15.4803	711.85	17.1102	695.44	0.304867	1.00664	0.704442
	Bare land	492.02	0.0389353	559.8	15.3495	711.85	25.1424	695.44	0.164974	0.518731	1.23213
	Bare land	492.02	0.0313669	559.81	10.788	711.85	13.9268	695.44	0.180657	0.844873	1.34674
	Bare land	492.02	0.10747	559.82	21.9226	711.85	23.9532	695.44	0.271861	0.223304	0.5643
	Bare land	492.02	0.0596125	559.83	20.4692	711.85	15.9829	695.44	0.221038	0.869	1.28343
	Bare land	492.02	0.0665062	559.84	11.8202	711.85	19.1441	695.44	0.222629	0.712625	0.269696
	Bare land	492.02	0.11419	559.85	12.3425	711.85	14.183	695.44	0.199815	0.716397	0.000957661
	Bare land	492.02	0.0882621	559.86	5.75452	711.85	12.0767	695.44	0.333593	0.537847	0.629075
	Bare land	492.02	0.0482153	559.87	16.3815	711.85	12.307	695.44	0.28828	0.97624	0.547593
	Bare land	492.02	0.0707319	559.88	11.9673	711.85	17.9024	695.44	0.343885	1.16894	-0.0976089
	Bare land	492.02	0.0616679	559.89	14.2174	711.85	12.9465	695.44	0.389185	0.968528	-0.0153105
	Bare land	492.02	0.0511454	559.9	10.0382	711.85	14.3897	695.44	0.463768	0.528668	0.663484
	Bare land	492.02	0.0735538	559.91	19.7752	711.85	17.096	695.44	0.370944	0.556991	0.809958
	Bare land	492.02	0.078397	559.92	22.4462	711.85	20.961	695.44	0.237665	0.690334	1.94272
	Bare land	492.02	0.0780625	559.93	20.0807	711.85	23.5724	695.44	0.239966	0.286821	0.780923
	Bare land	492.02	0.0679921	559.94	11.0618	711.85	16.1944	695.44	0.373262	0.532382	0.92819
	Bare land	492.02	0.0986573	559.95	8.52542	711.85	20.4316	695.44	0.360069	0.719157	-0.166315
	Bare land	492.02	0.122179	559.96	12.7582	711.85	13.4119	695.44	0.319538	0.354821	0.20179
	Bare land	492.02	0.0998206	559.97	11.4865	711.85	13.7154	695.44	0.279835	0.340201	0.32124
	Bare land	492.02	0.0902399	559.98	15.4457	711.85	15.434	695.44	0.229877	0.888776	0.71148
	Bare land	492.02	0.078674	559.99	8.05079	711.85	15.0432	695.44	0.232123	0.67898	0.43146
	Bare land	492.02	0.0787429	559.1	6.95917	711.85	19.5186	695.44	0.30751	0.74994	0.601272
	Bare land	492.02	0.0773534	559.101	19.276	711.85	19.0597	695.44	0.317181	0.725802	0.143865
	Bare land	492.02	0.0519052	559.102	14.0519	711.85	15.4244	695.44	0.127175	0.905123	0.230256
	Bare land	494.57	0.0837077	559.103	15.4974	711.85	18.9512	695.44	0.301038	0.68554	2.23952
	Bare land	494.57	0.0492677	559.104	14.0864	711.85	14.4764	695.44	0.367716	0.576866	0.634796
	Bare land	494.57	0.0939389	559.105	16.6263	711.85	15.9622	695.44	0.408732	0.515536	0.324073
	Bare land	494.57	0.0739577	559.106	13.3478	711.85	22.6588	695.44	0.291163	0.558417	0.409935
	Bare land	494.57	0.0598	559.107	11.4713	711.85	15.4137	695.44	0.132125	0.27028	0.597675
	Bare land	494.57	0.0949534	559.108	13.1909	711.85	13.7691	695.44	0.309786	0.467841	0.470742
	Bare land	494.57	0.0748216	559.109	14.3616	711.85	18.0264	695.44	0.235645	0.468732	0.641212
	Bare land	494.57	0.0345883	559.11	15.4457	711.85	22.8794	695.44	0.165548	0.421417	-0.073619
	Bare land	494.57	0.0629516	559.111	18.2481	711.85	26.9207	695.44	0.547687	0.513065	0.36251
	Bare land	494.57	0.125909	559.112	11.813	711.85	15.8911	695.44	0.121425	0.852692	1.43909
	Bare land	494.57	0.107355	559.113	11.1297	711.85	26.0271	695.44	0.284742	0.51419	0.645452
	Bare land	494.57	0.0721175	559.114	11.1905	711.85	20.1408	695.44	0.154111	0.477929	0.843911
	Bare land	494.57	0.0651145	559.115	13.2219	711.85	25.9405	695.44	0.135266	0.299944	0.901008
	Bare land	494.57	0.160058	559.116	9.9761	711.85	23.9172	695.44	0.544935	0.433139	0.42378
	Bare land	494.57	0.0754704	559.117	10.679	711.85	15.8977	695.44	0.234875	0.542855	0.535046
	Bare land	494.57	0.0439522	559.118	6.3998	711.85	18.9456	695.44	0.244883	0.541252	0.647109
	Bare land	494.57	0.066673	559.119	8.27835	711.85	13.5937	695.44	0.2783	0.497961	1.57006
	Bare land	494.57	0.0584411	559.12	9.14754	714.59	19.0175	695.44	0.281498	0.859351	1.6528
	Bare land	494.57	0.0507827	559.121	10.5051	714.59	14.9226	695.44	0.166101	1.38407	1.29605
	Bare land	494.57	0.0811613	559.122	9.19722	728.34	28.8083	695.44	0.229968	0.601056	0.296552
	Bare land	494.57	0.0612758	559.123	14.5943	736.62	25.0609	695.44	0.202359	0.981599	0.491212
	Bare land	494.57	0.0670649	559.124	24.1859	739.38	22.5924	695.44	0.347183	0.420012	1.13186
	Bare land	494.57	0.0869873	559.125	11.5777	739.38	23.9375	695.44	0.27927	0.368124	0.630325
	Bare land	494.57	0.0793115	559.126	18.8184	742.14	15.8146	695.44	0.254177	0.413575	0.686393
	Bare land	494.57	0.0872843	559.127	11.0964	742.14	14.4746	695.44	0.415194	0.560484	0.933438
	Bare land	494.57	0.0669224	559.128	8.85593	742.14	13.9447	695.44	0.100996	0.564864	0.714252
	Bare land	494.57	0.102847	559.129	9.34664	742.14	17.4192	695.44	0.488399	0.581778	1.05396
	Bare land	494.57	0.0725323	559.13	11.41	742.14	16.5783	695.44	0.418458	0.355025	0.902394
	Bare land	494.57	0.0965786	559.131	11.7679	742.14	12.4531	695.44	0.293254	0.31384	1.02018
	Bare land	494.57	0.0683266	559.132	13.2671	742.14	15.7435	695.44	0.236514	0.498817	0.925409
	Bare land	494.57	0.119833	559.133	6.77134	742.14	35.4555	695.44	0.218169	0.365177	1.34145
	Bare land	494.57	0.120405	559.134	5.36065	742.14	16.578	695.44	0.27103	0.442176	0.939198
	Bare land	494.57	0.128577	559.135	10.322	742.14	22.0021	695.44	0.274907	0.558734	1.59454
	Bare land	494.57	0.0701492	559.136	7.03626	742.14	15.6295	695.44	0.300159	0.303038	1.11358
	Bare land	494.57	0.0687948	559.137	11.5146	742.14	19.156	695.44	0.37572	1.1877	0.583742
	Bare land	494.57	0.0626063	559.138	12.1211	750.45	29.8826	695.44	0.175782	0.306571	0.0645806
	Bare land	497.13	0.0395115	559.139	9.23654	750.45	29.3463	695.44	0.227264	0.747121	0.907671
	Bare land	497.13	0.0294238	559.14	20.6742	753.23	11.039	695.44	0.325546	0.869365	0.0358972
	Bare land	497.13	0.0497032	559.141	13.1096	753.23	8.10964	695.44	0.154645	0.824873	1.17159
	Bare land	497.13	0.0830262	559.142	16.4742	753.23	16.3962	695.44	0.306179	0.582515	0.766327
	Bare land	497.13	0.064906	559.143	17.4468	753.23	28.3307	695.44	0.334542	0.329455	1.06526
	Bare land	497.13	0.0841875	559.144	11.5323	753.23	11.325	695.44	0.219319	0.357757	0.810837
	Bare land	497.13	0.090746	559.145	5.79185	756.01	12.8225	695.44	0.0885605	0.655557	0.72304
	Bare land	497.13	0.104873	559.146	8.94783	756.01	15.5946	695.44	0.407139	0.622603	0.684605
	Bare land	497.13	0.0453065	559.147	11.5879	756.01	15.7611	695.44	0.317494	0.80119	1.74802
	Bare land	497.13	0.0664153	559.148	12.3292	756.01	21.6566	695.44	0.321595	0.602937	0.520371
	Bare land	497.13	0.0938569	559.149	11.7817	756.01	20.9043	695.44	0.171917	0.70675	1.08822
	Bare land	497.13	0.0504744	559.15	11.8911	756.01	21.2757	695.44	0.290077	0.746423	1.28489
	Bare land	497.13	0.110472	559.151	12.9824	756.01	18.5702	695.44	0.256921	0.856873	0.0664556
	Bare land	497.13	0.104387	559.152	14.5859	756.01	24.2491	695.44	0.459591	0.43685	0.304593
	Bare land	497.13	0.0816052	559.153	17.6402	756.01	12.965	695.44	0.382944	0.593453	1.11793
	Bare land	497.13	0.117698	559.154	8.73868	756.01	12.0029	695.44	0.284391	0.532022	1.01871
	Bare land	497.13	0.0750218	559.155	9.4807	756.01	11.6344	695.44	0.238343	0.916212	-0.11201
	Bare land	497.13	0.0547903	559.156	11.3364	756.01	17.3592	695.44	0.287706	0.993028	1.47079
	Bare land	497.13	0.101216	559.157	16.9913	756.01	13.2281	695.44	0.323837	0.613581	0.528591
	Bare land	497.13	0.0397256	559.158	20.4439	756.01	13.7628	695.44	0.243448	0.7473	0.992401
	Bare land	497.13	0.0430012	559.159	11.7569	756.01	13.4821	695.44	0.193171	0.600219	0.525286
	Bare land	499.69	0.0678972	559.16	15.0519	756.01	14.6138	695.44	0.523871	0.538875	0.738877
	Bare land	499.69	0.0854958	559.161	11.5892	756.01	15.7238	695.44	0.334131	0.401669	0.737681
	Bare land	499.69	0.0518786	559.162	11.6797	756.01	20.8329	695.44	0.540069	0.489066	0.804113
	Bare land	499.69	0.0337139	559.163	8.32627	756.01	19.4638	695.44	0.432304	0.693226	0.169843
	Bare land	499.69	0.0635639	559.164	11.1416	756.01	14.3755	695.44	0.15056	0.514941	1.22078
	Bare land	499.69	0.114562	559.165	12.8845	756.01	9.87226	695.44	0.423317	0.543051	0.519452
	Bare land	499.69	0.113937	559.166	9.21979	758.78	12.2438	695.44	0.313433	0.319781	0.773807
	Bare land	499.69	0.105849	559.167	10.5539	758.78	15.4743	695.44	0.199109	0.708992	0.854607
	Bare land	499.69	0.0692393	559.168	7.74398	758.78	12.2162	695.44	0.305889	0.548209	1.05891
	Bare land	499.69	0.0657028	559.169	13.2374	758.78	15.1238	695.44	0.0882339	0.347836	0.160706
	Bare land	499.69	0.0752419	559.17	11.1256	758.78	11.0122	695.44	0.445885	0.88448	1.98727
	Bare land	499.69	0.0444917	559.171	8.50639	758.78	11.4888	695.44	0.357145	0.683204	1.83425
	Bare land	499.69	0.116272	559.172	17.4259	758.78	15.3033	695.44	0.383762	0.685276	1.62592
	Bare land	499.69	0.0845006	559.173	15.3489	758.78	10.988	695.44	0.108968	0.731139	1.66807
	Bare land	499.69	0.0900645	559.174	15.9636	758.78	23.1415	695.44	0.139083	0.529823	1.9782
	Bare land	507.39	0.0667319	559.175	13.8301	758.78	17.3535	695.44	0.256286	0.953339	0.645196
	Bare land	507.39	0.076254	559.176	11.8672	758.78	18.6131	698.17	0.240389	0.419468	1.75381
	Bare land	512.53	0.0306474	559.177	18.3401	758.78	15.3267	698.17	0.194188	0.619373	2.15638
	Bare land	512.53	0.0485	559.178	9.57288	758.78	15.5123	698.17	0.075494	0.593153	1.68095
	Bare land	512.53	0.065754	559.179	13.5818	758.78	17.6816	698.17	0.171071	0.485913	0.666482
	Bare land	512.53	0.0547379	559.18	11.7129	758.78	24.8152	698.17	0.19816	0.353975	0.283125
	Bare land	512.53	0.0538575	559.181	10.1505	758.78	15.0365	698.17	0.188036	0.767587	0.392
	Bare land	512.53	0.0888548	559.182	8.66592	758.78	18.6633	698.17	0.292373	0.425138	0.284597
	Bare land	512.53	0.0846835	559.183	12.4141	758.78	20.5693	698.17	0.116942	0.443891	-0.00868548
	Bare land	512.53	0.0602274	559.184	10.2399	758.78	16.9721	698.17	0.396462	0.531889	-0.0160847
	Bare land	512.53	0.0776653	559.185	12.2576	758.78	16.3325	698.17	0.138613	0.591716	0.689929
	Bare land	512.53	0.0912863	559.186	13.4154	758.78	26.6793	698.17	0.140252	1.19733	1.14414
	Bare land	512.53	0.121058	559.187	21.8477	758.78	16.1126	698.17	0.272117	0.633968	0.367752
	Bare land	515.11	0.112639	559.188	14.6771	758.78	14.4296	698.17	0.229631	0.393289	1.12732
	Bare land	515.11	0.0668508	559.189	8.29217	758.78	17.2063	698.17	0.263915	0.426656	0.804996
	Bare land	515.11	0.100948	559.19	9.24394	758.78	21.4934	698.17	0.160663	1.00323	1.29944
	Bare land	515.11	0.112375	559.191	19.1057	758.78	8.39424	698.17	0.158502	0.918857	0.785573
	Bare land	517.68	0.092629	559.192	15.8006	758.78	14.7413	698.17	0.282992	0.84053	0.834518
	Bare land	517.68	0.103548	559.193	17.2446	758.78	20.0934	698.17	0.222129	0.542244	-0.027748
	Bare land	517.68	0.0733692	559.194	11.8774	758.78	27.1663	698.17	0.16345	0.644652	0.730345
	Bare land	517.68	0.0614718	559.195	10.7982	758.78	16.6886	698.17	0.370708	0.363893	0.0189113
	Bare land	517.68	0.0656591	559.196	8.44815	758.78	22.4519	698.17	0.256823	0.664573	0.518188
	Bare land	517.68	0.122014	559.197	13.6373	758.78	13.1587	698.17	0.437901	0.470609	0.726843
	Bare land	520.26	0.106079	559.198	9.79918	758.78	22.3242	698.17	0.222438	0.705623	0.915931
	Bare land	520.26	0.101131	559.199	13.1753	758.78	17.1183	698.17	0.317107	0.416253	1.29435
	Bare land	520.26	0.0671472	559.2	8.3383	758.78	15.7369	698.17	0.363214	0.401322	0.625628
	Bare land	520.26	0.0564435	559.201	8.08657	758.78	12.151	698.17	0.489992	0.346116	0.0985262
	Bare land	520.26	0.122141	559.202	8.35515	758.78	15.027	698.17	0.313147	0.512561	1.38576
	Bare land	520.26	0.0906371	559.203	9.90251	758.78	28.6722	698.17	0.371264	0.504647	0.709151
	Bare land	520.26	0.117435	559.204	9.39859	758.78	26.1408	698.17	0.104341	0.346776	0.417282
	Bare land	520.26	0.131512	559.205	9.42509	758.78	16.5611	698.17	0.202669	0.352862	0.50624
	Bare land	520.26	0.132298	559.206	9.00224	758.78	19.715	698.17	0.442433	0.408562	0.395302
	Bare land	520.26	0.066926	559.207	10.5316	758.78	8.16939	698.17	0.460466	1.21756	1.12494
	Bare land	520.26	0.138314	559.208	22.1855	758.78	22.5614	698.17	0.383385	0.336863	0.567692
	Bare land	522.84	0.0546083	559.209	10.606	758.78	14.7042	700.9	0.111718	0.508022	0.504714
	Bare land	525.43	0.0819093	559.21	12.7197	758.78	19.9351	700.9	0.152423	0.468626	-0.0273629
	Bare land	525.43	0.0550609	559.211	11.7428	758.78	16.0106	703.64	0.131435	0.526691	0.187125
	Bare land	525.43	0.0999496	559.212	10.9294	758.78	21.434	703.64	0.161558	0.594562	1.08444
	Bare land	525.43	0.079276	559.213	11.1018	758.78	15.6039	722.84	0.361304	0.553757	0.823012
	Bare land	525.43	0.0710401	559.214	10.4712	758.78	9.67817	722.84	0.402008	0.454132	0.411163
	Bare land	525.43	0.0982964	559.215	11.2416	758.78	14.5179	722.84	0.391532	0.27302	0.640343
	Bare land	525.43	0.0902177	559.216	8.81406	758.78	16.4787	722.84	0.413687	0.817405	1.23437
	Bare land	525.43	0.0946161	559.217	15.1407	758.78	13.2835	722.84	0.506913	0.787994	0.116865
	Bare land	525.43	0.106161	559.218	14.0393	758.78	12.3895	722.84	0.49455	0.829056	2.28847
	Bare land	525.43	0.0928143	559.219	14.4952	758.78	16.2104	722.84	0.502012	0.702573	0.0245605
	Bare land	525.43	0.108331	559.22	13.3493	758.78	18.6104	722.84	0.440935	0.535786	-0.0166129
	Bare land	525.43	0.0372135	559.221	10.8772	758.78	10.1091	722.84	0.312444	0.527963	0.883373
	Bare land	525.43	0.0690766	559.222	10.9834	758.78	8.2762	722.84	0.387647	0.52128	0.619712
	Bare land	525.43	0.150879	559.223	11.4609	758.78	14.7276	722.84	0.378026	0.871526	-0.323462
	Bare land	525.43	0.135901	559.224	15.2808	758.78	12.0496	722.84	0.430887	0.784508	0.795627
	Bare land	525.43	0.100496	559.225	15.5275	758.78	16.476	722.84	0.379458	0.759548	0.186855
	Bare land	525.43	0.0669442	559.226	13.5891	758.78	18.2761	722.84	0.296532	0.879579	0.145444
	Bare land	525.43	0.111494	559.227	17.0705	758.78	13.7048	722.84	0.247954	0.485494	0.876514
	Bare land	525.43	0.0922204	559.228	11.5488	758.78	15.8627	722.84	0.339224	0.851688	0.55647
	Bare land	525.43	0.150395	559.229	15.0293	758.78	9.82508	722.84	0.329782	0.82752	0.606333
	Bare land	525.43	0.178859	559.23	16.3557	758.78	16.853	722.84	0.264796	0.636445	1.25221
	Bare land	525.43	0.145258	559.231	10.7599	758.78	18.3009	722.84	0.291165	0.473126	0.0913044
	Bare land	525.43	0.0949899	559.232	10.0271	758.78	18.5119	722.84	0.245407	0.689716	0.594284
	Bare land	525.43	0.112571	559.233	13.7578	758.78	20.2707	722.84	0.232567	0.691921	1.2507
	Bare land	525.43	0.12395	559.234	13.0325	758.78	14.8943	722.84	0.327899	0.479511	0.0671552
	Bare land	525.43	0.0781681	559.235	11.357	758.78	16.3092	722.84	0.428837	0.711992	0.142786
	Bare land	525.43	0.0903147	559.236	16.1752	758.78	20.6641	725.59	0.0690706	0.678142	1.00743
	Bare land	525.43	0.0662885	559.237	11.9886	758.78	15.7015	725.59	0.120371	0.510351	0.838776
	Bare land	525.43	0.0798718	559.238	10.5802	758.78	16.0233	725.59	0.100619	0.815353	0.879655
	Bare land	525.43	0.0966169	559.239	15.498	758.78	15.8288	725.59	0.141155	0.657108	1.75371
	Bare land	525.43	0.0720962	559.24	12.6787	758.78	14.1783	725.59	0.160772	0.526294	0.554667
	Bare land	525.43	0.0548171	559.241	10.2686	758.78	18.327	725.59	0.147629	0.365838	1.56024
	Bare land	525.43	0.0791181	559.242	7.49743	758.78	15.4079	725.59	0.246016	0.688653	1.50828
	Bare land	525.43	0.0736956	559.243	14.216	758.78	25.3291	725.59	0.18101	0.729411	0.817716
	Bare land	525.43	0.0548891	559.244	13.2836	758.78	22.7931	725.59	0.168972	0.429254	1.08804
	Bare land	525.43	0.160982	559.245	9.39488	758.78	22.1908	725.59	0.132615	0.471153	0.0220181
	Bare land	525.43	0.0812863	559.246	10.5138	758.78	19.5646	725.59	0.126401	0.565101	1.55022
	Bare land	525.43	0.0713508	559.247	9.43919	758.78	18.6003	725.59	0.119651	0.520414	0.852135
	Bare land	525.43	0.071	559.248	12.2772	758.78	15.454	725.59	0.0687097	0.596712	0.19294
	Bare land	525.43	0.142976	559.249	12.8546	758.78	21.2944	725.59	0.245093	0.480475	0.105837
	Bare land	525.43	0.124246	559.25	10.898	758.78	12.5848	725.59	0.141405	0.37088	0.490649
	Bare land	525.43	0.0776065	559.251	9.24958	758.78	13.516	725.59	0.107512	0.410972	0.932728
	Bare land	525.43	0.132175	559.252	9.52093	758.78	23.2407	725.59	0.100909	0.648979	2.04742
	Bare land	525.43	0.0635516	559.253	12.2958	758.78	15.7558	725.59	0.150252	0.343169	0.666946
	Bare land	525.43	0.0711304	559.254	10.3205	758.78	17.7552	725.59	0.0765645	0.84346	2.17107
	Bare land	525.43	0.0991714	559.255	15.0619	758.78	12.9545	725.59	0.0628468	0.769964	1.54567
	Bare land	525.43	0.0714492	559.256	14.1893	758.78	15.063	725.59	0.104369	0.681444	1.32655
	Bare land	525.43	0.0518319	559.257	12.4882	758.78	14.7361	725.59	0.111573	0.949232	1.05923
	Bare land	525.43	0.0798391	559.258	16.8007	758.78	15.9707	728.34	0.123956	0.552632	1.17461
	Bare land	525.43	0.0608345	559.259	11.1442	758.78	12.3739	728.34	0.120223	0.564519	1.38445
	Bare land	525.43	0.0929637	559.26	11.3761	758.78	21.491	728.34	0.212209	0.394031	0.421272
	Bare land	525.43	0.0630252	559.261	9.55084	758.78	22.0133	728.34	0.347216	1.0557	1.40686
	Bare land	525.43	0.0915161	559.262	20.5837	758.78	16.3385	728.34	0.276899	0.530653	1.37831
	Bare land	525.43	0.104397	559.263	9.71725	758.78	19.5346	728.34	0.663417	0.711393	1.17362
	Bare land	525.43	0.134538	559.264	13.1735	758.78	15.8413	728.34	0.486923	0.656095	0.809905
	Bare land	525.43	0.137679	559.265	13.5588	758.78	19.5378	728.34	0.288799	0.784	1.00568
	Bare land	525.43	0.0615395	559.266	14.4783	758.78	17.2228	728.34	0.420804	1.18163	1.89434
	Bare land	525.43	0.123333	559.267	18.2949	758.78	14.8008	728.34	0.495145	0.951952	1.25269
	Bare land	525.43	0.0619435	559.268	14.9803	758.78	19.1915	728.34	0.370768	0.815541	1.53766
	Bare land	525.43	0.0770427	559.269	12.5115	758.78	12.8665	728.34	0.391123	0.871968	1.68346
	Bare land	525.43	0.0939234	559.27	14.9793	758.78	21.461	728.34	0.393722	0.863236	0.808435
	Bare land	525.43	0.0869052	559.271	16.985	758.78	17.5476	728.34	0.312252	0.403084	1.13981
	Bare land	525.43	0.115055	559.272	9.35422	758.78	13.9214	728.34	0.33381	0.848532	1.55372
	Bare land	525.43	0.163835	559.273	14.2086	758.78	19.9855	728.34	0.276685	0.726135	1.76433
	Bare land	525.43	0.105498	559.274	13.1272	758.78	14.0768	728.34	0.710032	1.08279	1.10953
	Bare land	525.43	0.0563966	559.275	18.635	758.78	23.4807	728.34	0.100871	0.783452	1.14563
	Bare land	525.43	0.0902177	559.276	14.301	758.78	20.9074	728.34	0.162536	0.575077	0.379885
	Bare land	525.43	0.0953044	559.277	12.549	758.78	18.269	728.34	0.127075	0.617082	1.18098
	Bare land	525.43	0.0381611	559.278	10.643	758.78	23.7267	728.34	0.381948	0.749963	1.12499
	Bare land	525.43	0.0721109	559.279	12.4192	758.78	16.4958	728.34	0.217669	0.935411	0.854944
	Bare land	525.43	0.0949032	559.28	15.8321	758.78	17.9874	728.34	0.501413	0.966371	0.0364536
	Bare land	525.43	0.0727331	559.281	15.6165	758.78	12.5765	728.34	0.387083	1.14946	0.427367
	Bare land	525.43	0.071027	559.282	17.6561	758.78	15.4144	728.34	0.0901008	0.50331	0.317714
	Bare land	525.43	0.0599685	559.283	11.0782	758.78	19.7207	728.34	0.0785363	1.07035	0.594357
	Bare land	525.43	0.0765827	559.284	17.0648	758.78	20.4096	728.34	0.0813347	0.696718	0.135637
	Bare land	525.43	0.0680387	559.285	14.3104	758.78	27.9041	728.34	0.2817	0.73856	1.09926
	Bare land	530.6	0.116825	559.286	14.6878	758.78	21.9591	728.34	0.398988	0.887514	0.949212
	Bare land	530.6	0.0546444	559.287	15.4447	758.78	20.7794	728.34	0.306026	0.930766	0.272204
	Bare land	530.6	0.0755121	559.288	18.3681	758.78	21.457	728.34	0.109222	0.77144	0.923431
	Bare land	530.6	0.117296	559.289	14.6767	758.78	13.795	728.34	0.100754	0.870339	0.522919
	Bare land	530.6	0.0568387	559.29	15.6791	758.78	20.9987	731.1	0.0951935	0.931095	1.50112
	Bare land	530.6	0.059281	559.291	15.0723	758.78	20.01	731.1	0.0897637	1.29464	1.34429
	Bare land	530.6	0.099994	559.292	21.5117	758.78	25.6192	733.86	0.044652	0.688246	1.1007
	Bare land	530.6	0.031446	559.293	13.9589	758.78	20.3019	736.62	0.075371	0.667302	1.17867
	Bare land	530.6	0.0584361	559.294	13.4384	758.78	16.5314	736.62	0.0710522	0.953536	0.439766
	Bare land	530.6	0.0472397	559.295	15.3618	758.78	18.8352	736.62	0.0970228	0.370524	0.960093
	Bare land	530.6	0.0450192	559.296	6.71214	758.78	22.0301	736.62	0.106982	0.327654	0.852778
	Bare land	530.6	0.0454895	559.297	8.27532	758.78	20.2915	736.62	0.0710907	0.400064	1.04121
	Bare land	530.6	0.13622	559.298	11.3054	758.78	22.0272	742.14	0.0833286	0.64854	0.298849
	Bare land	530.6	0.0806774	559.299	10.4872	758.78	21.3875	744.91	0.113157	0.472777	0.567552
	Bare land	530.6	0.0642218	559.3	11.102	758.78	21.6229	744.91	0.208226	0.638037	0.454946
	Bare land	530.6	0.044825	559.301	11.2597	758.78	29.1123	747.68	0.198274	0.666724	1.0602
	Bare land	530.6	0.0640966	559.302	8.73856	758.78	19.4824	750.45	0.104859	0.358181	0.774226
	Bare land	530.6	0.0867601	559.303	10.6994	758.78	19.1143	750.45	0.134567	0.512043	1.10748
	Bare land	530.6	0.106147	559.304	11.6163	758.78	11.0318	753.23	0.0952923	0.465863	0.812595
	Bare land	530.6	0.0526536	559.305	12.695	758.78	13.48	753.23	0.0881331	0.410875	-0.210117
	Bare land	530.6	0.0859234	559.306	9.66829	758.78	14.4119	756.01	0.103002	0.347235	0.58779
	Bare land	530.6	0.0518131	559.307	11.2892	758.78	17.3882	756.01	0.1442	0.514493	0.0576351
	Bare land	530.6	0.081754	559.308	11.286	758.78	13.349	758.78	0.19729	0.58775	0.93997
	Bare land	530.6	0.129532	559.309	13.3245	758.78	16.5283	758.78	0.24075	0.564704	0.197399
	Bare land	530.6	0.107063	559.31	8.92369	758.78	16.3521	758.78	0.0674677	0.395386	0.219423
	Bare land	530.6	0.0586538	559.311	9.60461	758.78	13.5862	758.78	0.114171	0.394856	0.282927
	Bare land	530.6	0.067919	559.312	11.2538	758.78	16.977	758.78	0.16946	0.522079	1.31342
	Bare land	530.6	0.104317	559.313	11.8679	758.78	16.7075	758.78	0.122931	0.676927	0.78752
	Bare land	530.6	0.0910544	559.314	8.67704	758.78	16.6384	758.78	0.204482	0.242157	0.539696
	Bare land	530.6	0.0831613	559.315	9.63016	758.78	11.8605	758.78	0.207437	0.449984	0.0395524
	Bare land	530.6	0.056498	559.316	8.90103	758.78	12.5158	758.78	0.173429	0.317767	0.598218
June	Seriphidium transiliense	492.02	0.0474401	517.68	21.96	641.32	18.7326	689.99	0.150275	1.07002	5.88368
	Seriphidium transiliense	492.02	0.0919633	548.78	17.5228	641.32	6.58407	692.71	0.32569	0.83236	2.94476
	Seriphidium transiliense	492.02	0.06078	551.39	7.14795	641.32	10.601	695.44	0.39858	0.656634	4.60202
	Seriphidium transiliense	492.02	0.0487629	551.39	11.5233	641.32	11.8156	695.44	0.204605	0.45332	2.7735
	Seriphidium transiliense	492.02	0.0762872	551.39	9.72362	641.32	17.975	695.44	0.331212	0.566087	3.69464
	Seriphidium transiliense	492.02	0.0646599	551.39	12.867	641.32	16.2517	695.44	0.207994	0.590768	4.60704
	Seriphidium transiliense	492.02	0.120108	551.39	8.60883	641.32	16.5955	695.44	0.0976857	0.470261	3.40418
	Seriphidium transiliense	492.02	0.100788	551.39	25.9405	641.32	27.9703	695.44	0.427754	0.279615	1.33015
	Seriphidium transiliense	492.02	0.140992	551.39	17.5653	641.32	16.8202	695.44	0.41933	0.386816	2.38163
	Seriphidium transiliense	492.02	0.101244	551.39	22.5484	641.32	16.9459	695.44	0.238796	0.536342	2.35096
	Seriphidium transiliense	492.02	0.0829369	551.39	26.168	641.32	26.0697	695.44	0.254817	0.783708	4.29192
	Seriphidium transiliense	494.57	0.0423527	551.39	20.9175	641.32	15.8381	695.44	0.372295	0.688619	3.13389
	Seriphidium transiliense	497.13	0.088666	551.39	13.6866	641.32	20.3768	695.44	0.270088	0.476398	3.37817
	Seriphidium transiliense	497.13	0.0667475	551.39	11.7817	641.32	14.2308	695.44	0.200717	0.313004	2.38609
	Seriphidium transiliense	497.13	0.11698	551.39	24.1011	641.32	11.7496	695.44	0.252758	0.821843	6.13513
	Seriphidium transiliense	499.69	0.0291959	551.39	21.3448	641.32	25.2131	695.44	0.371336	0.508603	1.881
	Seriphidium transiliense	499.69	0.140931	551.39	12.1576	641.32	21.0944	695.44	0.39722	0.611788	3.24759
	Seriphidium transiliense	499.69	0.114065	551.39	14.5634	641.32	11.6415	695.44	0.441774	0.514183	1.89641
	Seriphidium transiliense	499.69	0.173804	551.39	14.885	641.32	14.667	695.44	0.417338	0.357751	3.7315
	Seriphidium transiliense	499.69	0.0864908	551.39	17.5278	641.32	22.9905	695.44	0.261342	0.678806	3.03266
	Seriphidium transiliense	499.69	0.0774479	551.39	19.7436	641.32	18.3875	695.44	0.197627	0.556552	4.9281
	Seriphidium transiliense	504.82	0.0832077	551.39	14.1756	641.32	16.8073	695.44	0.571134	0.714399	5.82417
	Seriphidium transiliense	507.39	0.120963	551.39	18.2931	641.32	14.9923	695.44	0.227633	0.446632	3.67216
	Seriphidium transiliense	507.39	0.0624338	551.39	15.67	641.32	18.0837	695.44	0.315788	0.637721	4.12099
	Seriphidium transiliense	507.39	0.0679695	551.39	12.4335	641.32	15.5461	695.44	0.508782	0.435614	3.297
	Seriphidium transiliense	507.39	0.0869959	551.39	21.9383	641.32	20.2208	695.44	0.434456	0.760553	5.14389
	Seriphidium transiliense	512.53	0.0994277	551.39	13.7507	641.32	17.6164	695.44	0.462314	0.515779	3.52246
	Seriphidium transiliense	512.53	0.0894969	551.39	15.222	641.32	14.7165	698.17	0.775367	0.369179	1.6842
	Seriphidium transiliense	512.53	0.189703	551.39	10.2053	641.32	15.0207	698.17	0.467735	0.468403	1.90412
	Seriphidium transiliense	515.11	0.0798289	551.39	9.35695	641.32	17.9021	698.17	0.343289	0.506361	3.049
	Seriphidium transiliense	515.11	0.0737393	551.39	17.6732	641.32	18.4762	698.17	0.562556	1.17443	5.342
	Seriphidium transiliense	515.11	0.215733	553.99	11.6529	641.32	16.438	698.17	0.371829	0.695711	5.08174
	Seriphidium transiliense	515.11	0.146039	553.99	13.2649	641.32	13.5866	698.17	0.462232	0.364992	0.835924
	Seriphidium transiliense	515.11	0.0932607	553.99	26.1063	641.32	17.6877	698.17	0.377931	0.1961	0.440947
	Seriphidium transiliense	515.11	0.126187	553.99	28.0959	641.32	15.945	698.17	0.39409	0.737902	3.69486
	Seriphidium transiliense	515.11	0.144234	553.99	17.7865	641.32	13.7738	698.17	0.222707	0.641729	3.53046
	Seriphidium transiliense	515.11	0.110367	553.99	18.134	641.32	16.2445	698.17	0.431301	0.68724	4.44626
	Seriphidium transiliense	515.11	0.216049	553.99	22.0847	641.32	18.6023	698.17	0.235224	0.577324	5.06994
	Seriphidium transiliense	515.11	0.156499	553.99	25.9861	641.32	15.9369	698.17	0.408371	0.822397	4.41534
	Seriphidium transiliense	515.11	0.118397	553.99	11.9316	641.32	17.145	698.17	0.349499	0.54765	2.98076
	Seriphidium transiliense	515.11	0.116996	553.99	15.0992	641.32	25.9387	698.17	0.382847	1.27212	8.45301
	Seriphidium transiliense	515.11	0.14698	553.99	17.821	641.32	14.4488	698.17	0.394892	1.68142	7.04871
	Seriphidium transiliense	515.11	0.122772	553.99	20.1034	641.32	17.9131	698.17	0.425483	0.906719	5.29233
	Seriphidium transiliense	515.11	0.101593	553.99	21.7235	641.32	9.44072	698.17	0.370935	0.95788	4.06022
	Seriphidium transiliense	517.68	0.167855	553.99	15.9295	641.32	12.3027	698.17	0.379778	0.700309	5.41356
	Seriphidium transiliense	517.68	0.161424	553.99	18.0085	641.32	11.5679	698.17	0.324593	1.23419	5.60135
	Seriphidium transiliense	520.26	0.0304377	553.99	16.5423	641.32	17.0474	698.17	0.461717	0.956238	5.53432
	Seriphidium transiliense	520.26	0.0672163	553.99	15.9024	641.32	13.9856	698.17	0.487334	0.722538	3.98849
	Seriphidium transiliense	520.26	0.0679532	553.99	29.0846	641.32	17.769	698.17	0.370593	0.678212	4.30103
	Seriphidium transiliense	520.26	0.128308	553.99	17.0724	641.32	17.9046	698.17	0.515308	1.33857	9.41211
	Seriphidium transiliense	520.26	0.0875356	553.99	22.4357	644.01	10.971	698.17	0.496004	0.950369	5.19741
	Seriphidium transiliense	520.26	0.124931	556.6	19.6	644.01	10.3238	698.17	0.525719	1.0043	6.29825
	Seriphidium transiliense	520.26	0.0736864	556.6	15.6941	644.01	10.7898	698.17	0.439572	0.80343	4.56098
	Seriphidium transiliense	520.26	0.118513	556.6	11.7797	644.01	13.157	698.17	0.601039	1.41578	7.60898
	Seriphidium transiliense	520.26	0.17535	556.6	10.1167	644.01	11.0055	698.17	0.454754	1.03039	4.79556
	Seriphidium transiliense	520.26	0.214253	556.6	10.7512	644.01	14.8725	698.17	0.329825	0.744041	4.12274
	Seriphidium transiliense	520.26	0.0832179	556.6	19.4184	644.01	7.353	698.17	0.45331	0.412041	1.74623
	Seriphidium transiliense	520.26	0.131747	556.6	12.8359	644.01	11.7675	698.17	0.57678	1.12703	7.95382
	Seriphidium transiliense	520.26	0.16879	556.6	6.13331	644.01	13.3621	698.17	0.412086	0.883962	5.51938
	Seriphidium transiliense	520.26	0.160521	556.6	8.56216	644.01	8.86574	698.17	0.257819	1.06951	5.56856
	Seriphidium transiliense	520.26	0.185835	556.6	11.587	644.01	13.0993	698.17	0.468815	0.876291	4.07893
	Seriphidium transiliense	520.26	0.112507	556.6	10.8043	644.01	13.4439	700.9	0.159287	1.2097	7.55812
	Seriphidium transiliense	520.26	0.164943	556.6	15.0828	644.01	12.0985	700.9	0.132633	0.531891	2.4966
	Seriphidium transiliense	520.26	0.0870094	556.6	11.3037	644.01	10.2422	703.64	0.275864	1.29252	9.4786
	Seriphidium transiliense	520.26	0.108022	556.6	9.24116	644.01	21.2114	703.64	0.390544	1.18404	6.954
	Seriphidium transiliense	520.26	0.0829735	556.6	14.5206	644.01	17.1499	703.64	0.244847	0.749202	4.67407
	Seriphidium transiliense	520.26	0.130574	556.6	11.9239	644.01	12.3185	703.64	0.431308	0.649084	4.53402
	Seriphidium transiliense	520.26	0.100069	556.6	11.4342	644.01	15.9189	703.64	0.319868	0.735688	4.57515
	Seriphidium transiliense	520.26	0.0835454	556.6	13.6975	644.01	25.6224	703.64	0.584617	0.760077	6.93462
	Seriphidium transiliense	520.26	0.0902933	556.6	12.1444	644.01	18.2106	703.64	0.473106	1.37846	8.21212
	Seriphidium transiliense	522.84	0.0926497	556.6	7.31962	644.01	24.6596	703.64	0.356629	0.989428	5.07782
	Seriphidium transiliense	522.84	0.0599387	556.6	8.45824	644.01	16.6002	703.64	0.377409	0.778373	4.46953
	Seriphidium transiliense	522.84	0.0806354	556.6	11.3846	644.01	12.3391	703.64	0.398136	0.767419	4.47614
	Seriphidium transiliense	522.84	0.112882	556.6	9.01625	644.01	22.8302	703.64	0.353894	0.861379	4.15791
	Seriphidium transiliense	522.84	0.130597	556.6	21.3122	644.01	25.383	703.64	0.271534	0.68599	2.96837
	Seriphidium transiliense	522.84	0.0989369	556.6	12.2199	644.01	18.4019	703.64	0.26543	0.545946	2.25059
	Seriphidium transiliense	522.84	0.114633	556.6	7.08513	644.01	12.68	703.64	0.316876	0.562554	1.41782
	Seriphidium transiliense	522.84	0.0929593	556.6	4.30132	644.01	20.036	703.64	0.260892	0.79566	5.85578
	Seriphidium transiliense	522.84	0.106234	556.6	13.4202	644.01	18.0711	703.64	0.255016	0.595511	4.13074
	Seriphidium transiliense	522.84	0.215422	556.6	13.625	644.01	22.6763	703.64	0.357741	0.788538	5.49991
	Seriphidium transiliense	522.84	0.0989348	556.6	12.8993	644.01	12.8159	703.64	0.276495	1.13311	5.36324
	Seriphidium transiliense	522.84	0.102452	556.6	11.3721	644.01	17.2659	703.64	0.234271	0.703744	4.59363
	Seriphidium transiliense	522.84	0.105902	556.6	19.514	644.01	15.1407	703.64	0.593678	0.893935	5.40819
	Seriphidium transiliense	522.84	0.0680061	556.6	14.6329	644.01	24.1782	703.64	0.745745	1.02442	6.48054
	Seriphidium transiliense	522.84	0.092558	556.6	21.165	644.01	19.2023	703.64	0.388063	0.706819	6.03806
	Seriphidium transiliense	522.84	0.0855377	556.6	16.3734	644.01	19.9487	703.64	0.324825	0.99155	5.03406
	Seriphidium transiliense	522.84	0.07878	556.6	16.7055	644.01	25.8647	703.64	0.272619	0.987116	6.48825
	Seriphidium transiliense	522.84	0.0902713	556.6	12.8152	644.01	10.496	703.64	0.607578	0.90664	3.26011
	Seriphidium transiliense	522.84	0.0483585	556.6	26.3866	644.01	14.4079	706.37	0.270395	0.983432	5.17396
	Seriphidium transiliense	522.84	0.0721344	556.6	17.3154	644.01	18.5968	706.37	0.338878	0.602193	3.42478
	Seriphidium transiliense	522.84	0.195721	556.6	16.0778	644.01	15.0083	706.37	0.391481	0.774564	5.3718
	Seriphidium transiliense	522.84	0.140153	556.6	14.793	644.01	27.8771	706.37	0.539951	1.48133	7.63831
	Seriphidium transiliense	522.84	0.130621	556.6	15.7552	644.01	14.1595	706.37	0.505996	0.665266	3.66137
	Seriphidium transiliense	522.84	0.0878819	556.6	14.3352	644.01	20.854	706.37	0.279377	0.735458	3.64843
	Seriphidium transiliense	522.84	0.0900733	556.6	22.4187	644.01	15.4322	706.37	0.368731	0.637118	3.97994
	Seriphidium transiliense	522.84	0.103611	556.6	15.9274	644.01	17.7787	706.37	0.368108	0.887302	4.66993
	Seriphidium transiliense	522.84	0.115676	556.6	14.7705	644.01	13.8292	706.37	0.474181	0.488666	1.67502
	Seriphidium transiliense	525.43	0.217377	556.6	13.0516	644.01	13.8739	706.37	0.354075	0.982014	5.64919
	Seriphidium transiliense	525.43	0.109949	556.6	17.8	644.01	10.7503	706.37	0.352982	0.980536	5.82534
	Seriphidium transiliense	525.43	0.119319	556.6	17.7935	644.01	11.8401	706.37	0.47189	0.522519	3.41636
	Seriphidium transiliense	525.43	0.12919	556.6	11.8851	644.01	20.066	706.37	0.436051	0.640448	4.15838
	Seriphidium transiliense	525.43	0.16958	556.6	24.5687	644.01	16.661	706.37	0.346847	0.69642	3.74949
	Seriphidium transiliense	525.43	0.125564	556.6	18.1588	644.01	16.1749	706.37	0.57221	1.40314	8.43983
	Seriphidium transiliense	525.43	0.0803521	556.6	13.2503	644.01	15.0338	706.37	0.343206	1.28843	5.08609
	Seriphidium transiliense	525.43	0.104055	556.6	18.5942	644.01	25.507	706.37	0.360403	1.17836	6.52206
	Seriphidium transiliense	525.43	0.0862965	556.6	17.5516	644.01	26.138	709.11	0.329521	0.916326	4.00933
	Seriphidium transiliense	525.43	0.151847	556.6	22.441	644.01	30.0908	709.11	0.273723	0.894212	5.23269
	Seriphidium transiliense	525.43	0.0785051	556.6	23.5172	644.01	24.5136	709.11	0.317829	0.830096	6.43496
	Seriphidium transiliense	525.43	0.0650908	556.6	16.373	644.01	15.5571	709.11	0.334265	0.662519	4.06235
	Seriphidium transiliense	525.43	0.120018	556.6	12.7966	644.01	13.2784	709.11	0.802322	0.83833	5.16658
	Seriphidium transiliense	525.43	0.0969982	556.6	24.7298	644.01	15.1287	709.11	0.361572	0.722358	6.80326
	Seriphidium transiliense	525.43	0.12598	556.6	15.3009	644.01	20.7568	709.11	0.33067	0.484267	4.37406
	Seriphidium transiliense	525.43	0.0625656	556.6	11.5584	644.01	22.2895	709.11	0.581301	1.07619	7.25033
	Seriphidium transiliense	525.43	0.116422	556.6	13.1599	644.01	22.4238	709.11	0.29234	1.02635	5.86848
	Seriphidium transiliense	525.43	0.106019	556.6	17.4049	644.01	24.5726	709.11	0.301996	0.757059	3.64599
	Seriphidium transiliense	525.43	0.0971479	556.6	16.7727	644.01	17.5706	709.11	0.390558	0.782772	4.23804
	Seriphidium transiliense	525.43	0.108493	556.6	11.0868	644.01	14.8094	709.11	0.479536	0.650324	2.11088
	Seriphidium transiliense	525.43	0.146762	556.6	15.5302	644.01	19.4431	709.11	0.549489	1.21553	7.79443
	Seriphidium transiliense	525.43	0.119615	556.6	22.6594	644.01	15.3106	709.11	0.307866	1.13023	6.74116
	Seriphidium transiliense	525.43	0.167088	556.6	22.8654	646.7	10.7337	709.11	0.277876	0.635896	2.92995
	Seriphidium transiliense	525.43	0.122961	556.6	17.6588	646.7	14.3107	709.11	0.354255	0.787764	4.44347
	Seriphidium transiliense	525.43	0.164678	556.6	20.3566	646.7	21.1357	709.11	0.284823	1.22261	4.34143
	Seriphidium transiliense	525.43	0.163026	556.6	11.3834	646.7	26.264	709.11	0.51687	0.671128	3.49452
	Seriphidium transiliense	525.43	0.115265	556.6	14.1978	646.7	16.6599	709.11	0.370556	0.835978	3.7387
	Seriphidium transiliense	525.43	0.259073	556.6	10.7089	646.7	16.8133	709.11	0.491403	1.07404	5.93283
	Seriphidium transiliense	525.43	0.198092	556.6	12.25	646.7	16.0688	709.11	0.464713	0.641994	3.3178
	Seriphidium transiliense	525.43	0.154642	556.6	24.809	646.7	22.8968	709.11	0.789145	0.609648	2.38858
	Seriphidium transiliense	525.43	0.0996334	556.6	24.0134	646.7	11.4493	709.11	0.353621	0.683839	4.12264
	Seriphidium transiliense	525.43	0.273102	556.6	18.5954	646.7	24.839	709.11	0.57189	0.748328	3.30071
	Seriphidium transiliense	525.43	0.134073	556.6	18.8177	646.7	15.3114	709.11	0.484872	0.690029	2.56279
	Seriphidium transiliense	525.43	0.1802	556.6	17.5933	646.7	19.077	711.85	0.338138	0.750731	4.20493
	Seriphidium transiliense	525.43	0.251057	556.6	14.6081	646.7	15.6028	711.85	0.547413	0.423727	1.52913
	Seriphidium transiliense	525.43	0.212014	556.6	11.7366	646.7	15.8764	717.34	0.582695	0.904198	4.0277
	Seriphidium transiliense	525.43	0.173308	556.6	16.7983	646.7	12.0591	722.84	0.29787	0.963933	4.216
	Seriphidium transiliense	525.43	0.233902	556.6	16.3456	646.7	19.7695	722.84	0.471941	0.611212	1.75524
	Seriphidium transiliense	525.43	0.171134	556.6	14.1164	646.7	21.8089	722.84	0.241077	0.567908	3.18897
	Seriphidium transiliense	525.43	0.164493	556.6	22.6113	646.7	22.1081	722.84	0.955397	0.579079	1.56382
	Seriphidium transiliense	525.43	0.175715	556.6	20.3879	646.7	18.1191	722.84	0.52258	0.938497	3.94683
	Seriphidium transiliense	525.43	0.243149	556.6	21.545	646.7	16.5553	722.84	0.636762	0.830503	4.32708
	Seriphidium transiliense	525.43	0.300847	556.6	17.9628	646.7	11.7729	722.84	0.376029	0.804415	3.6659
	Seriphidium transiliense	525.43	0.287035	556.6	17.0068	646.7	15.8997	722.84	0.790499	0.769617	2.43826
	Seriphidium transiliense	525.43	0.108792	556.6	15.2746	646.7	14.2077	722.84	0.405974	0.540741	2.2981
	Seriphidium transiliense	525.43	0.143646	556.6	25.7055	646.7	17.0547	722.84	0.387866	0.727749	2.84147
	Seriphidium transiliense	525.43	0.170468	556.6	13.7417	646.7	17.537	722.84	0.767383	0.908263	3.65982
	Seriphidium transiliense	525.43	0.165336	556.6	17.6893	646.7	22.1997	722.84	0.429102	0.546444	1.28843
	Seriphidium transiliense	525.43	0.269788	556.6	16.295	646.7	20.1242	722.84	0.430737	0.887183	3.96419
	Seriphidium transiliense	525.43	0.156847	556.6	17.2586	646.7	19.5555	722.84	0.227684	0.846919	7.22481
	Seriphidium transiliense	525.43	0.127672	556.6	15.5773	646.7	20.5915	722.84	0.896312	0.709487	3.55249
	Seriphidium transiliense	525.43	0.135935	556.6	17.0235	646.7	20.3253	722.84	0.228692	0.611073	2.30617
	Seriphidium transiliense	525.43	0.0809328	556.6	13.9517	646.7	18.1977	722.84	0.5411	0.585678	1.71823
	Seriphidium transiliense	525.43	0.109367	556.6	13.0333	646.7	17.1301	722.84	0.801582	1.29518	7.89691
	Seriphidium transiliense	525.43	0.194695	556.6	16.0372	646.7	20.455	722.84	0.35946	0.820949	2.75047
	Seriphidium transiliense	525.43	0.169497	556.6	9.74665	646.7	21.604	722.84	0.489515	1.00898	5.82839
	Seriphidium transiliense	525.43	0.146548	556.6	17.0721	646.7	19.6378	722.84	0.257377	0.997961	6.00796
	Seriphidium transiliense	525.43	0.1352	556.6	19.0599	646.7	13.8112	722.84	0.404888	0.646862	2.83039
	Seriphidium transiliense	525.43	0.0972069	556.6	17.2115	646.7	20.5305	722.84	0.655206	0.623311	2.16238
	Seriphidium transiliense	525.43	0.137558	556.6	14.2787	649.38	9.45488	722.84	0.519271	1.07796	5.45562
	Seriphidium transiliense	525.43	0.223849	556.6	15.729	649.38	9.12675	722.84	0.455342	1.14278	6.89126
	Seriphidium transiliense	525.43	0.121432	556.6	17.86	649.38	11.5491	722.84	0.614246	1.02597	5.85132
	Seriphidium transiliense	525.43	0.128428	556.6	21.6671	649.38	16.9782	722.84	0.495613	0.722377	2.4448
	Seriphidium transiliense	525.43	0.199485	556.6	15.0799	649.38	16.4675	722.84	0.623108	0.639703	2.70881
	Seriphidium transiliense	525.43	0.112519	556.6	15.3794	649.38	19.4468	722.84	0.766511	0.852428	5.05688
	Seriphidium transiliense	525.43	0.161059	556.6	11.8823	649.38	15.7173	722.84	0.637204	0.693065	2.69747
	Seriphidium transiliense	525.43	0.10465	556.6	14.7073	649.38	15.7216	722.84	0.713654	0.818733	4.41635
	Seriphidium transiliense	525.43	0.0936943	556.6	18.6651	649.38	17.7118	722.84	0.81456	0.743116	4.04465
	Seriphidium transiliense	525.43	0.127807	556.6	13.7727	649.38	13.9269	722.84	0.7779	1.17472	6.24468
	Seriphidium transiliense	525.43	0.108397	556.6	19.8576	649.38	19.9618	722.84	0.368088	1.44659	8.17293
	Seriphidium transiliense	525.43	0.146285	556.6	21.9149	649.38	15.1332	722.84	0.454136	0.874678	4.93806
	Seriphidium transiliense	525.43	0.203242	556.6	14.7279	652.08	21.9019	722.84	0.49424	0.955627	4.7242
	Seriphidium transiliense	525.43	0.111758	556.6	16.1934	654.77	13.3803	722.84	0.841141	1.01779	5.53591
	Seriphidium transiliense	525.43	0.13564	556.6	22.3286	660.16	13.5832	722.84	0.34335	1.11951	5.43277
	Seriphidium transiliense	525.43	0.127996	556.6	16.2186	660.16	9.38706	722.84	0.412244	0.862894	5.74826
	Seriphidium transiliense	525.43	0.189652	556.6	17.7431	660.16	9.13762	722.84	0.544719	0.868238	4.37105
	Seriphidium transiliense	525.43	0.143501	556.6	17.6737	660.16	12.5632	722.84	0.468071	0.711689	4.41652
	Seriphidium transiliense	525.43	0.106978	556.6	12.0601	660.16	26.2786	725.59	0.47098	0.585234	2.55902
	Seriphidium transiliense	525.43	0.175733	556.6	16.781	660.16	12.4258	725.59	0.257043	1.14196	7.82388
	Seriphidium transiliense	525.43	0.112774	556.6	15.1013	660.16	20.0062	725.59	0.159739	0.431191	2.80922
	Seriphidium transiliense	525.43	0.15135	556.6	17.3516	660.16	14.4092	725.59	0.31121	0.85334	4.91134
	Seriphidium transiliense	525.43	0.147322	556.6	19.6159	660.16	20.4633	725.59	0.397898	0.670505	2.6382
	Seriphidium transiliense	525.43	0.0639878	556.6	15.8133	660.16	16.4919	725.59	0.37269	0.550507	1.32553
	Seriphidium transiliense	525.43	0.130259	556.6	18.104	660.16	12.6615	725.59	0.326183	0.586507	4.04077
	Seriphidium transiliense	525.43	0.129916	556.6	16.4561	660.16	17.8128	725.59	0.244222	0.788234	3.8173
	Seriphidium transiliense	525.43	0.209045	556.6	16.4212	660.16	24.4092	725.59	0.322672	0.927224	5.59776
	Seriphidium transiliense	525.43	0.166827	556.6	13.6954	660.16	16.3147	725.59	0.390462	0.582065	1.45592
	Seriphidium transiliense	525.43	0.0990998	556.6	19.5863	660.16	17.9476	725.59	0.447248	0.654002	3.10091
	Seriphidium transiliense	525.43	0.150269	556.6	19.2254	660.16	16.4022	725.59	0.553212	1.44726	8.44238
	Seriphidium transiliense	525.43	0.0876945	556.6	23.3789	660.16	22.9711	725.59	0.539794	1.02549	4.5188
	Seriphidium transiliense	525.43	0.112126	556.6	17.0216	660.16	22.4317	725.59	0.277454	0.779601	4.14877
	Seriphidium transiliense	525.43	0.11677	556.6	18.2981	660.16	14.1186	725.59	0.459175	0.592112	3.16459
	Seriphidium transiliense	525.43	0.10721	556.6	11.7988	660.16	10.7512	728.34	0.163916	0.793369	3.58629
	Seriphidium transiliense	525.43	0.0693585	556.6	15.5122	662.86	21.6475	728.34	0.270656	0.869994	4.70669
	Seriphidium transiliense	525.43	0.10578	556.6	15.3049	662.86	10.3453	728.34	0.397525	0.505558	2.79282
	Seriphidium transiliense	525.43	0.150033	556.6	10.7449	662.86	12.7216	728.34	0.525126	0.438183	1.93625
	Seriphidium transiliense	525.43	0.134766	556.6	14.1303	662.86	29.6476	728.34	0.457597	0.840965	5.3684
	Seriphidium transiliense	525.43	0.0644114	556.6	11.5069	662.86	19.2522	728.34	0.209173	0.894413	5.16377
	Seriphidium transiliense	525.43	0.0960244	556.6	18.013	662.86	27.2601	728.34	0.40543	1.17482	6.28298
	Seriphidium transiliense	525.43	0.178701	556.6	10.7004	662.86	14.4668	728.34	0.305395	0.631613	1.24995
	Seriphidium transiliense	525.43	0.169623	556.6	15.7266	662.86	19.4493	728.34	0.452515	1.09252	6.34484
	Seriphidium transiliense	525.43	0.0886762	556.6	17.7617	662.86	12.408	728.34	0.597385	1.14968	5.40432
	Seriphidium transiliense	525.43	0.14856	556.6	18.3828	662.86	14.7538	728.34	0.554955	0.839055	5.4984
	Seriphidium transiliense	525.43	0.10268	556.6	12.6334	662.86	13.726	728.34	0.791888	1.04903	3.05109
	Seriphidium transiliense	525.43	0.152466	556.6	19.7498	662.86	13.6422	728.34	0.746585	1.22985	4.40363
	Seriphidium transiliense	525.43	0.173807	556.6	16.3316	662.86	18.4081	728.34	0.458957	0.985312	3.67976
	Seriphidium transiliense	525.43	0.14856	556.6	15.4358	662.86	14.7067	728.34	0.315326	0.939479	4.15933
	Seriphidium transiliense	525.43	0.146532	556.6	17.1196	662.86	20.4892	728.34	0.624326	0.751346	4.37319
	Seriphidium transiliense	525.43	0.12057	556.6	14.9828	662.86	16.864	728.34	0.235	0.681244	2.99207
	Seriphidium transiliense	525.43	0.103187	556.6	19.4391	662.86	17.6467	728.34	0.404619	0.818493	4.75441
	Seriphidium transiliense	525.43	0.187363	556.6	14.0617	662.86	15.8719	728.34	0.559597	0.743342	2.24717
	Seriphidium transiliense	525.43	0.250375	556.6	13.5238	662.86	19.4941	728.34	0.514161	0.715939	3.07707
	Seriphidium transiliense	525.43	0.147041	556.6	16.831	662.86	23.589	728.34	0.463043	0.949379	5.8005
	Seriphidium transiliense	525.43	0.0953218	556.6	17.35	662.86	13.3119	728.34	0.387974	0.717012	4.48139
	Seriphidium transiliense	525.43	0.150273	556.6	17.8895	662.86	16.4906	728.34	0.654179	0.836515	4.91697
	Seriphidium transiliense	525.43	0.113546	556.6	14.4345	662.86	15.7052	728.34	0.661367	0.872328	4.47608
	Seriphidium transiliense	525.43	0.0810181	556.6	14.3438	662.86	26.0721	728.34	0.865102	0.812595	5.73059
	Seriphidium transiliense	525.43	0.105808	556.6	22.3656	662.86	19.8876	728.34	0.560035	0.770754	4.52296
	Seriphidium transiliense	525.43	0.123798	556.6	16.7487	662.86	14.6434	728.34	0.521534	1.05496	6.4694
	Seriphidium transiliense	525.43	0.0787352	556.6	19.6041	662.86	14.8069	728.34	0.641314	0.97309	7.42747
	Seriphidium transiliense	525.43	0.073053	556.6	23.8285	662.86	15.1532	728.34	0.397175	0.807397	4.46837
	Seriphidium transiliense	525.43	0.111251	556.6	18.8878	662.86	19.1761	728.34	0.677833	0.685249	4.69137
	Seriphidium transiliense	525.43	0.161273	556.6	14.3732	665.57	19.8124	728.34	0.614692	0.704466	3.52138
	Seriphidium transiliense	525.43	0.105644	556.6	17.7325	665.57	7.19915	728.34	0.66823	0.864676	4.54302
	Seriphidium transiliense	525.43	0.115984	556.6	20.3315	665.57	15.2399	728.34	0.399591	0.946507	3.65596
	Seriphidium transiliense	525.43	0.19756	556.6	14.6266	665.57	14.5372	728.34	0.370849	0.886403	3.83438
	Seriphidium transiliense	525.43	0.185151	556.6	22.0621	665.57	19.2386	728.34	0.262603	1.00678	5.91963
	Seriphidium transiliense	525.43	0.186493	556.6	15.6239	665.57	16.7457	728.34	0.522656	0.878407	6.44729
	Seriphidium transiliense	525.43	0.175813	556.6	16.9548	665.57	16.5528	728.34	0.372582	1.13418	7.15203
	Seriphidium transiliense	525.43	0.0939369	556.6	18.253	665.57	14.171	728.34	0.909475	1.54151	9.37985
	Seriphidium transiliense	525.43	0.128843	556.6	19.6426	665.57	15.1774	728.34	0.267375	1.57573	8.55431
	Seriphidium transiliense	525.43	0.126766	556.6	15.2402	665.57	14.542	728.34	0.972947	2.03776	10.5405
	Seriphidium transiliense	525.43	0.168888	556.6	21.1533	665.57	23.4782	728.34	0.802393	0.730111	4.71467
	Seriphidium transiliense	525.43	0.0872301	556.6	20.0825	665.57	23.2847	728.34	0.469143	1.03644	3.24979
	Seriphidium transiliense	525.43	0.105747	556.6	14.5505	665.57	18.2942	728.34	0.626536	1.18593	5.77549
	Seriphidium transiliense	525.43	0.106652	556.6	11.7961	665.57	18.183	728.34	0.621031	1.00203	5.85025
	Seriphidium transiliense	525.43	0.158024	556.6	12.6367	665.57	17.5887	728.34	0.467159	0.634428	2.57651
	Seriphidium transiliense	525.43	0.107894	556.6	18.7021	665.57	16.5172	728.34	0.539943	0.716837	3.74418
	Seriphidium transiliense	525.43	0.184709	556.6	17.2917	665.57	16.6662	728.34	0.830181	1.01798	5.05413
	Seriphidium transiliense	525.43	0.323538	556.6	16.3007	665.57	10.9178	728.34	0.989018	0.875253	3.69873
	Seriphidium transiliense	525.43	0.268666	556.6	15.2152	665.57	19.1814	728.34	0.90787	0.974904	4.86454
	Seriphidium transiliense	525.43	0.396314	556.6	19.7878	665.57	16.9513	728.34	0.336904	0.841375	3.93845
	Seriphidium transiliense	525.43	0.13042	556.6	20.1832	665.57	22.2152	728.34	0.371301	0.799827	3.42869
	Seriphidium transiliense	525.43	0.129397	556.6	25.0509	665.57	15.8643	728.34	0.345527	0.917375	1.96136
	Seriphidium transiliense	525.43	0.12323	556.6	25.3001	665.57	21.3176	728.34	0.429086	0.612925	0.438218
	Seriphidium transiliense	525.43	0.147625	556.6	13.4769	665.57	17.7625	728.34	0.457466	0.640147	0.981613
	Seriphidium transiliense	525.43	0.211218	556.6	23.3013	665.57	18.0332	728.34	0.277395	0.924754	4.9307
	Seriphidium transiliense	525.43	0.126369	556.6	24.4623	665.57	21.5301	728.34	0.126574	1.11796	6.37091
	Seriphidium transiliense	525.43	0.162813	556.6	22.1087	665.57	16.7912	728.34	1.01152	1.01245	4.90411
	Seriphidium transiliense	525.43	0.0978269	556.6	16.4134	665.57	16.4574	728.34	0.508108	0.78669	3.91372
	Seriphidium transiliense	525.43	0.147743	556.6	15.7318	665.57	19.8852	728.34	0.34131	0.848709	5.08771
	Seriphidium transiliense	525.43	0.165049	556.6	22.2996	665.57	18.9478	728.34	0.291075	0.72479	4.45415
	Seriphidium transiliense	525.43	0.14687	556.6	18.9223	665.57	23.2134	728.34	0.598475	1.15576	4.11973
	Seriphidium transiliense	525.43	0.188912	556.6	19.1678	665.57	20.6782	728.34	0.508218	0.637187	3.38686
	Seriphidium transiliense	525.43	0.221037	556.6	21.132	665.57	11.8864	728.34	0.441173	0.703285	2.11501
	Seriphidium transiliense	525.43	0.105695	556.6	26.2831	665.57	16.2193	728.34	0.354342	0.692405	3.79254
	Seriphidium transiliense	525.43	0.117053	556.6	18.8743	665.57	10.6868	728.34	0.505	0.569782	2.48498
	Seriphidium transiliense	525.43	0.203605	556.6	15.6081	665.57	16.5599	728.34	0.671534	0.776684	4.52894
	Seriphidium transiliense	525.43	0.19179	556.6	16.2686	665.57	17.9108	728.34	0.705593	0.87636	4.67971
	Seriphidium transiliense	525.43	0.280381	556.6	20.8811	665.57	22.0149	728.34	0.484232	0.903077	5.25464
	Seriphidium transiliense	525.43	0.123446	556.6	14.6348	665.57	17.8657	728.34	0.817389	0.747081	2.75952
	Seriphidium transiliense	525.43	0.274481	556.6	22.4987	665.57	16.0554	728.34	0.521147	0.525385	1.72655
	Seriphidium transiliense	525.43	0.131248	556.6	14.2613	665.57	14.617	728.34	0.67676	0.841114	3.00325
	Seriphidium transiliense	525.43	0.223381	556.6	19.5361	665.57	17.7344	728.34	0.436356	0.975923	4.46265
	Seriphidium transiliense	525.43	0.290756	556.6	15.4655	665.57	23.3598	728.34	0.619006	0.920857	4.92179
	Seriphidium transiliense	525.43	0.257147	556.6	13.9383	665.57	15.7801	728.34	0.68813	0.538925	3.4468
	Seriphidium transiliense	525.43	0.135477	556.6	15.1602	665.57	13.2664	728.34	0.611267	0.64747	2.54288
	Seriphidium transiliense	525.43	0.167033	556.6	16.2984	665.57	13.8666	728.34	0.63358	0.596342	2.83126
	Seriphidium transiliense	525.43	0.190619	556.6	19.4462	665.57	15.1272	728.34	0.391031	0.632037	2.50535
	Seriphidium transiliense	525.43	0.154259	556.6	12.7364	665.57	18.0661	728.34	0.60678	0.978403	5.02636
	Seriphidium transiliense	525.43	0.144397	556.6	18.702	665.57	16.122	728.34	0.237766	0.947428	4.39791
	Seriphidium transiliense	525.43	0.142481	556.6	21.2569	665.57	23.2743	728.34	0.326037	1.48609	6.77063
	Seriphidium transiliense	525.43	0.102942	556.6	11.1184	665.57	20.0107	728.34	0.36765	0.712116	2.86743
	Seriphidium transiliense	525.43	0.102117	556.6	13.6154	665.57	22.1171	728.34	0.662432	1.35195	7.65069
	Seriphidium transiliense	525.43	0.219365	556.6	13.1534	665.57	16.8889	728.34	0.54434	1.18899	4.41177
	Seriphidium transiliense	525.43	0.192959	556.6	15.219	665.57	20.8376	728.34	0.920823	1.38013	7.63707
	Seriphidium transiliense	525.43	0.136138	556.6	15.9022	665.57	14.4273	731.1	0.501878	0.864676	5.02404
	Seriphidium transiliense	525.43	0.11796	556.6	13.9324	665.57	14.4192	731.1	0.338747	1.23305	6.77134
	Seriphidium transiliense	525.43	0.174033	556.6	22.7781	665.57	21.1613	731.1	0.335193	1.39259	8.61938
	Seriphidium transiliense	525.43	0.127721	556.6	14.8686	665.57	11.03	731.1	0.502073	1.30871	6.48599
	Seriphidium transiliense	525.43	0.183352	556.6	22.4764	665.57	14.9505	736.62	0.149642	1.03502	4.70606
	Seriphidium transiliense	525.43	0.176697	556.6	22.9373	665.57	19.3487	736.62	0.336293	1.05813	5.18195
	Seriphidium transiliense	525.43	0.110383	556.6	25.5064	668.27	10.6917	736.62	0.304743	1.09151	4.98676
	Seriphidium transiliense	528.01	0.0985967	556.6	13.7664	670.98	13.193	736.62	0.25344	0.681316	4.38356
	Seriphidium transiliense	528.01	0.0752301	556.6	20.4184	676.4	17.4486	736.62	0.130191	0.851232	4.82241
	Seriphidium transiliense	528.01	0.103548	556.6	17.3505	676.4	22.7564	736.62	0.183161	0.609363	4.09479
	Seriphidium transiliense	528.01	0.0663564	556.6	19.3668	679.11	8.4192	744.91	0.264118	0.695637	3.7118
	Seriphidium transiliense	528.01	0.118342	556.6	18.0125	679.11	5.86064	744.91	0.211868	0.546554	4.50791
	Seriphidium transiliense	528.01	0.0853279	556.6	14.1423	679.11	15.8902	744.91	0.361424	0.458129	3.14701
	Seriphidium transiliense	528.01	0.11579	556.6	12.4761	679.11	26.7699	744.91	0.447721	1.06375	5.89075
	Seriphidium transiliense	528.01	0.0909267	556.6	18.2074	679.11	17.398	744.91	0.271067	0.726916	1.8221
	Seriphidium transiliense	528.01	0.0814277	556.6	20.3714	679.11	18.2344	744.91	0.269509	1.22201	6.43958
	Seriphidium transiliense	528.01	0.105183	556.6	12.2068	679.11	21.8414	747.68	0.214921	0.804888	4.02658
	Seriphidium transiliense	528.01	0.102246	556.6	9.80242	679.11	18.1318	747.68	0.33069	0.508278	2.53931
	Seriphidium transiliense	528.01	0.123153	556.6	14.6228	679.11	27.2083	747.68	0.259102	0.872955	5.32732
	Seriphidium transiliense	528.01	0.106523	556.6	11.9166	679.11	15.8346	747.68	0.346857	0.716914	6.04831
	Seriphidium transiliense	528.01	0.110678	556.6	17.81	679.11	26.4282	747.68	0.23935	0.956517	7.10694
	Seriphidium transiliense	528.01	0.102047	556.6	14.9833	679.11	26.6481	747.68	0.325949	0.876413	6.47907
	Seriphidium transiliense	528.01	0.082556	556.6	18.8569	679.11	29.5562	750.45	0.222363	1.12141	4.43384
	Seriphidium transiliense	528.01	0.0992688	556.6	15.3326	679.11	26.1606	750.45	0.293686	0.946851	5.38574
	Seriphidium transiliense	528.01	0.076611	556.6	19.1225	679.11	22.8682	750.45	0.533024	1.13867	6.64753
	Seriphidium transiliense	528.01	0.073501	556.6	17.3827	679.11	26.069	750.45	0.201246	0.98221	4.31959
	Seriphidium transiliense	528.01	0.101	556.6	18.7136	679.11	13.9391	753.23	0.223684	1.0087	6.19095
	Ceratocarpus arenarius	492.02	0.112961	548.78	17.7598	641.32	16.3756	689.99	0.373022	0.47894	3.00062
	Ceratocarpus arenarius	492.02	0.0752059	548.78	14.3979	641.32	22.9384	692.71	0.175395	0.516075	2.17995
	Ceratocarpus arenarius	492.02	0.0762864	551.39	11.374	641.32	13.6185	692.71	0.385534	0.427599	2.36117
	Ceratocarpus arenarius	492.02	0.0582648	551.39	14.0909	641.32	16.9672	692.71	0.374018	0.529861	1.69673
	Ceratocarpus arenarius	492.02	0.0664786	551.39	15.5876	641.32	22.2159	692.71	0.410314	0.424175	1.12993
	Ceratocarpus arenarius	492.02	0.12678	551.39	17.1523	641.32	19.7054	692.71	0.3208	0.803924	6.29005
	Ceratocarpus arenarius	492.02	0.124218	551.39	12.9017	641.32	16.7824	692.71	0.23042	0.711796	6.12001
	Ceratocarpus arenarius	492.02	0.143096	551.39	9.34961	644.01	13.7102	692.71	0.274037	0.565035	5.6115
	Ceratocarpus arenarius	492.02	0.133334	551.39	18.2102	644.01	12.8283	692.71	0.233413	0.498839	2.41338
	Ceratocarpus arenarius	492.02	0.119609	551.39	17.9762	644.01	11.5444	692.71	0.135452	0.525332	1.31491
	Ceratocarpus arenarius	492.02	0.109868	551.39	21.5129	644.01	21.1323	692.71	0.104083	0.499608	2.02
	Ceratocarpus arenarius	492.02	0.054835	551.39	20.5889	644.01	25.3407	692.71	0.261224	0.441351	0.515436
	Ceratocarpus arenarius	492.02	0.0653625	551.39	23.6686	644.01	23.6093	692.71	0.146749	0.407721	1.33491
	Ceratocarpus arenarius	492.02	0.0932648	551.39	22.793	644.01	24.7882	692.71	0.18721	0.598866	3.93963
	Ceratocarpus arenarius	492.02	0.0555145	551.39	28.7684	644.01	18.1378	692.71	0.301387	0.504513	2.43589
	Ceratocarpus arenarius	492.02	0.121676	551.39	11.7213	644.01	18.4239	692.71	0.184792	0.688947	4.08532
	Ceratocarpus arenarius	492.02	0.101914	551.39	18.1019	644.01	13.6515	692.71	0.245982	0.599713	1.7466
	Ceratocarpus arenarius	492.02	0.087666	551.39	19.3762	644.01	21.6858	692.71	0.253187	0.418322	2.49122
	Ceratocarpus arenarius	492.02	0.0803218	551.39	18.0216	644.01	20.9585	692.71	0.278868	0.488097	2.36761
	Ceratocarpus arenarius	492.02	0.0768004	551.39	20.6057	644.01	20.9244	692.71	0.296866	0.555955	4.00285
	Ceratocarpus arenarius	492.02	0.114733	553.99	24.7108	644.01	20.4405	695.44	0.311269	0.643523	4.90718
	Ceratocarpus arenarius	492.02	0.0697051	556.6	17.5725	644.01	20.4318	695.44	0.322462	0.54457	2.56372
	Ceratocarpus arenarius	492.02	0.0807862	556.6	16.4925	644.01	22.5893	695.44	0.186835	0.473014	2.23008
	Ceratocarpus arenarius	492.02	0.0903422	556.6	20.7436	644.01	21.3133	695.44	0.128719	0.62322	1.50564
	Ceratocarpus arenarius	492.02	0.114275	556.6	21.6838	644.01	18.3346	695.44	0.167802	0.57261	1.50729
	Ceratocarpus arenarius	492.02	0.0795601	556.6	20.4368	644.01	19.4098	695.44	0.125622	0.511578	4.00843
	Ceratocarpus arenarius	492.02	0.0781324	556.6	18.2998	644.01	21.2909	695.44	0.626251	0.29006	2.27661
	Ceratocarpus arenarius	492.02	0.113864	556.6	17.8677	644.01	20.2848	695.44	0.199424	0.381444	1.00541
	Ceratocarpus arenarius	492.02	0.106515	556.6	20.6827	644.01	21.1005	695.44	0.187067	0.354187	1.79823
	Ceratocarpus arenarius	494.57	0.112458	559.22	11.8509	644.01	25.6487	695.44	0.355847	0.370273	1.87872
	Ceratocarpus arenarius	494.57	0.0962464	559.22	13.7239	644.01	18.7614	695.44	0.408143	0.328507	2.34314
	Ceratocarpus arenarius	494.57	0.136344	559.22	13.5971	644.01	18.0295	695.44	0.215945	0.386274	0.519287
	Ceratocarpus arenarius	494.57	0.136731	559.22	12.2533	644.01	14.4182	695.44	0.55479	0.267419	0.959566
	Ceratocarpus arenarius	494.57	0.116	559.22	13.3674	644.01	22.4538	695.44	0.521016	0.52123	2.6375
	Ceratocarpus arenarius	494.57	0.0494591	559.22	13.9019	644.01	28.1171	695.44	0.923904	0.73709	3.83356
	Ceratocarpus arenarius	494.57	0.140149	559.22	16.0957	644.01	14.9735	695.44	0.865884	0.790293	3.318
	Ceratocarpus arenarius	494.57	0.147778	559.22	13.325	644.01	26.3559	695.44	0.175169	0.761285	2.59474
	Ceratocarpus arenarius	494.57	0.150234	559.22	16.1812	644.01	24.9424	695.44	0.209678	0.684124	4.16931
	Ceratocarpus arenarius	494.57	0.0968615	559.22	16.4984	644.01	25.0996	695.44	0.634633	0.611051	4.03688
	Ceratocarpus arenarius	494.57	0.107271	559.22	11.66	644.01	23.8423	695.44	0.537927	0.908719	3.59105
	Ceratocarpus arenarius	494.57	0.107094	559.22	10.4241	646.7	14.734	695.44	0.744259	0.782334	3.36134
	Ceratocarpus arenarius	494.57	0.0771222	559.22	14.9029	646.7	16.017	695.44	0.298731	0.742892	4.46764
	Ceratocarpus arenarius	494.57	0.088387	559.22	16.307	646.7	11.5534	695.44	0.266096	0.742802	4.28395
	Ceratocarpus arenarius	494.57	0.120898	559.22	15.9443	646.7	23.8767	695.44	0.18767	0.72945	6.38285
	Ceratocarpus arenarius	494.57	0.156452	559.22	12.6523	646.7	16.7556	695.44	0.2721	0.774204	5.38315
	Ceratocarpus arenarius	494.57	0.151067	559.22	11.3786	646.7	17.3844	695.44	0.191236	0.904633	1.28231
	Ceratocarpus arenarius	494.57	0.126006	559.22	14.0095	646.7	21.7681	695.44	0.367314	0.805721	5.37076
	Ceratocarpus arenarius	494.57	0.11421	559.22	14.3243	646.7	20.451	695.44	0.358008	0.599692	1.7497
	Ceratocarpus arenarius	494.57	0.0796212	559.22	15.3384	649.38	24.6915	695.44	0.253542	0.617024	1.82938
	Ceratocarpus arenarius	494.57	0.125764	559.22	12.0662	649.38	23.9409	695.44	0.323825	0.783081	0.546862
	Ceratocarpus arenarius	494.57	0.115837	559.22	12.0361	654.77	19.3313	695.44	0.26602	0.858316	3.85642
	Ceratocarpus arenarius	497.13	0.0637216	559.22	10.4943	657.46	28.704	695.44	0.491344	0.992988	3.09076
	Ceratocarpus arenarius	497.13	0.0632322	559.22	10.4819	660.16	13.3407	695.44	0.533169	0.934067	2.6236
	Ceratocarpus arenarius	497.13	0.0730878	559.22	10.6328	660.16	16.6853	698.17	0.317177	0.928155	4.05586
	Ceratocarpus arenarius	497.13	0.0538295	559.22	10.0398	660.16	15.2924	698.17	0.323375	0.832527	3.79162
	Ceratocarpus arenarius	497.13	0.081945	559.22	8.102	660.16	14.606	698.17	0.588022	1.20193	3.08015
	Ceratocarpus arenarius	497.13	0.0993259	559.22	12.7599	660.16	17.5626	698.17	0.553768	0.698971	1.98321
	Ceratocarpus arenarius	497.13	0.101326	559.22	18.5352	660.16	19.1181	698.17	0.425768	0.537601	2.52023
	Ceratocarpus arenarius	497.13	0.111576	559.22	19.1791	660.16	14.0223	698.17	0.2511	0.72958	1.9229
	Ceratocarpus arenarius	497.13	0.089609	559.22	17.5059	660.16	10.7749	698.17	0.435982	0.794519	4.23529
	Ceratocarpus arenarius	497.13	0.070053	559.22	14.8547	660.16	12.636	698.17	0.494595	0.638534	3.31811
	Ceratocarpus arenarius	497.13	0.0955886	559.22	12.7914	660.16	24.2702	698.17	0.400051	0.908253	4.54517
	Ceratocarpus arenarius	497.13	0.0603646	559.22	22.9862	660.16	23.7676	698.17	0.39587	0.646754	2.98151
	Ceratocarpus arenarius	497.13	0.0888635	559.22	21.7957	660.16	23.5546	698.17	0.577711	0.661835	4.98727
	Ceratocarpus arenarius	497.13	0.114766	559.22	21.6311	660.16	26.713	698.17	0.293228	0.51453	1.31838
	Ceratocarpus arenarius	497.13	0.114986	559.22	20.5382	660.16	36.6965	698.17	0.895037	0.556969	5.02288
	Ceratocarpus arenarius	497.13	0.0823035	559.22	20.2479	660.16	22.8505	698.17	0.324035	0.67344	3.35241
	Ceratocarpus arenarius	497.13	0.0757352	559.22	20.4205	660.16	19.6162	698.17	0.399308	0.649415	3.624
	Ceratocarpus arenarius	497.13	0.0997108	559.22	22.4495	660.16	19.0622	698.17	0.495843	0.796163	5.67945
	Ceratocarpus arenarius	497.13	0.0847413	559.22	24.7526	660.16	21.0227	698.17	0.369157	0.6038	3.41729
	Ceratocarpus arenarius	497.13	0.0791507	559.22	26.6182	660.16	13.779	698.17	0.626	0.87831	6.74798
	Ceratocarpus arenarius	497.13	0.0820937	559.22	19.2475	660.16	24.2428	698.17	0.725802	0.772413	4.21329
	Ceratocarpus arenarius	497.13	0.118426	559.22	19.1608	660.16	26.885	698.17	0.825375	0.69766	6.99065
	Ceratocarpus arenarius	497.13	0.122859	559.22	15.9964	660.16	16.5952	698.17	0.323236	0.61713	2.63219
	Ceratocarpus arenarius	497.13	0.0957841	559.22	20.4048	660.16	22.2736	698.17	0.557273	0.427089	2.06563
	Ceratocarpus arenarius	497.13	0.0823727	559.22	22.8659	660.16	20.588	698.17	0.376291	0.467245	1.76466
	Ceratocarpus arenarius	497.13	0.090277	559.22	21.0963	660.16	22.1848	698.17	0.491699	1.03452	2.19092
	Ceratocarpus arenarius	497.13	0.070556	559.22	22.0255	660.16	7.99232	698.17	0.345458	1.17712	1.73517
	Ceratocarpus arenarius	497.13	0.0750163	559.22	22.9741	660.16	19.6819	698.17	0.445672	0.470717	3.32778
	Ceratocarpus arenarius	497.13	0.0764542	559.22	15.9337	660.16	27.5129	698.17	0.114595	0.825969	1.4944
	Ceratocarpus arenarius	497.13	0.104935	559.22	13.2465	660.16	19.1647	698.17	0.297662	0.505914	1.97818
	Ceratocarpus arenarius	497.13	0.0718045	559.22	18.1502	660.16	20.5937	698.17	0.32243	0.531326	1.81038
	Ceratocarpus arenarius	497.13	0.211523	559.22	17.0265	660.16	21.0866	698.17	0.48767	0.790788	2.86003
	Ceratocarpus arenarius	497.13	0.086336	559.22	15.8133	660.16	18.5323	698.17	0.432835	0.904699	7.93171
	Ceratocarpus arenarius	497.13	0.0656049	559.22	18.7191	660.16	31.5876	698.17	0.407674	0.746438	1.484
	Ceratocarpus arenarius	497.13	0.0951222	559.22	19.3159	660.16	22.0065	700.9	0.173086	0.702424	1.92162
	Ceratocarpus arenarius	497.13	0.102248	559.22	17.8395	660.16	24.0154	700.9	0.130562	0.605383	2.86899
	Ceratocarpus arenarius	497.13	0.0735153	559.22	18.2321	660.16	18.9193	700.9	0.144809	0.610344	1.90235
	Ceratocarpus arenarius	499.69	0.114177	559.22	11.699	660.16	25.1992	700.9	0.231605	0.626411	2.00065
	Ceratocarpus arenarius	499.69	0.0929813	559.22	23.8706	660.16	26.5322	700.9	0.139116	0.792112	1.08634
	Ceratocarpus arenarius	499.69	0.0715927	559.22	25.1894	660.16	28.9447	700.9	0.155552	0.456777	0.834462
	Ceratocarpus arenarius	499.69	0.0893992	559.22	12.4799	660.16	21.2016	700.9	0.159059	0.770177	4.22912
	Ceratocarpus arenarius	499.69	0.0658167	559.22	22.0322	660.16	15.206	700.9	0.177859	0.976287	4.76434
	Ceratocarpus arenarius	499.69	0.143369	559.22	14.4481	660.16	24.8463	700.9	0.199222	0.77147	4.11436
	Ceratocarpus arenarius	499.69	0.135269	559.22	15.9495	660.16	16.3962	700.9	0.385071	0.641988	4.29651
	Ceratocarpus arenarius	499.69	0.170886	559.22	21.0395	660.16	15.0558	703.64	0.205855	0.623218	3.31789
	Ceratocarpus arenarius	499.69	0.122475	559.22	16.8364	662.86	13.6903	703.64	0.333259	0.558509	2.13658
	Ceratocarpus arenarius	499.69	0.146735	559.22	18.2198	662.86	19.6438	703.64	0.179356	0.624477	3.54901
	Ceratocarpus arenarius	499.69	0.0907475	559.22	17.3856	662.86	19.3247	703.64	0.203955	0.799432	2.96724
	Ceratocarpus arenarius	499.69	0.0848147	559.22	15.8366	662.86	12.7919	703.64	0.263715	0.800055	3.60981
	Ceratocarpus arenarius	499.69	0.123151	559.22	16.2195	662.86	21.9849	703.64	0.249532	0.480939	3.56452
	Ceratocarpus arenarius	499.69	0.1259	559.22	20.1424	662.86	27.0058	703.64	0.290143	0.527914	4.26166
	Ceratocarpus arenarius	499.69	0.0858778	559.22	11.697	662.86	31.7602	703.64	0.355159	0.699886	2.3364
	Ceratocarpus arenarius	499.69	0.136134	559.22	23.609	662.86	18.5859	703.64	0.58343	0.552851	2.25005
	Ceratocarpus arenarius	499.69	0.0690662	559.22	26.3432	662.86	18.5017	703.64	0.373521	0.623857	2.26684
	Ceratocarpus arenarius	499.69	0.0873442	559.22	22.7542	662.86	26.9409	703.64	0.312059	0.725855	5.64555
	Ceratocarpus arenarius	499.69	0.0787393	559.22	16.3973	662.86	18.7254	703.64	0.373851	0.734619	3.0018
	Ceratocarpus arenarius	499.69	0.100953	559.22	18.685	662.86	21.5504	703.64	0.409077	0.519029	0.631018
	Ceratocarpus arenarius	499.69	0.0678324	559.22	17.2708	662.86	19.3188	703.64	0.328713	0.514857	0.724436
	Ceratocarpus arenarius	499.69	0.102855	559.22	19.9334	662.86	25.1034	706.37	0.434953	0.930646	3.25233
	Ceratocarpus arenarius	499.69	0.0848656	559.22	22.618	662.86	19.3048	706.37	0.235222	0.73167	3.19107
	Ceratocarpus arenarius	499.69	0.138483	559.22	20.465	662.86	19.9245	706.37	0.45145	0.691299	0.537511
	Ceratocarpus arenarius	499.69	0.0730489	559.22	13.0254	662.86	18.0326	706.37	0.360128	0.594717	1.13536
	Ceratocarpus arenarius	499.69	0.131073	559.22	18.9264	662.86	18.6716	706.37	0.491132	0.807552	2.59297
	Ceratocarpus arenarius	499.69	0.0590326	559.22	15.8591	662.86	15.9998	706.37	0.399287	0.799578	2.81117
	Ceratocarpus arenarius	499.69	0.163061	559.22	16.0503	662.86	19.2993	706.37	0.282287	0.773381	2.36146
	Ceratocarpus arenarius	499.69	0.0817678	559.22	20.5249	662.86	18.2492	709.11	0.188607	0.757923	8.35171
	Ceratocarpus arenarius	499.69	0.168365	559.22	18.6454	662.86	17.281	709.11	0.353974	0.572929	2.33688
	Ceratocarpus arenarius	499.69	0.132222	559.22	14.6853	662.86	21.5904	709.11	0.42456	0.513711	2.14109
	Ceratocarpus arenarius	499.69	0.0749837	559.22	14.8353	662.86	16.8192	722.84	0.330308	0.323176	1.57523
	Ceratocarpus arenarius	499.69	0.0963218	559.22	23.2552	662.86	15.8589	722.84	0.635961	0.210779	1.3473
	Ceratocarpus arenarius	499.69	0.0979246	559.22	19.5028	662.86	16.2429	722.84	0.886519	0.576448	2.71371
	Ceratocarpus arenarius	499.69	0.11187	559.22	20.0527	662.86	24.2034	722.84	0.16942	0.766906	3.78929
	Ceratocarpus arenarius	499.69	0.216059	559.22	16.6595	665.57	14.9506	722.84	0.646894	0.594295	2.14129
	Ceratocarpus arenarius	499.69	0.127509	559.22	20.9861	665.57	16.0961	722.84	0.394047	0.703299	1.16261
	Ceratocarpus arenarius	499.69	0.0990265	559.22	18.6835	665.57	13.1175	722.84	0.755794	0.732766	0.0333585
	Ceratocarpus arenarius	499.69	0.15057	559.22	19.8626	665.57	22.3661	722.84	0.620853	0.777949	8.09247
	Ceratocarpus arenarius	499.69	0.139864	559.22	18.5362	665.57	21.2217	722.84	1.08117	0.636509	3.19302
	Ceratocarpus arenarius	499.69	0.101051	559.22	16.8656	665.57	15.4485	722.84	0.801749	0.963982	5.61053
	Ceratocarpus arenarius	499.69	0.18235	559.22	14.6535	665.57	12.8424	722.84	0.41166	0.986782	3.46098
	Ceratocarpus arenarius	499.69	0.136923	559.22	10.746	665.57	28.4169	722.84	0.366246	0.997868	6.43872
	Ceratocarpus arenarius	499.69	0.110866	559.22	7.16094	665.57	26.2727	722.84	0.577507	0.951695	4.57121
	Ceratocarpus arenarius	499.69	0.0710346	559.22	16.5636	665.57	21.7329	722.84	0.324719	0.621405	1.10543
	Ceratocarpus arenarius	499.69	0.0931629	559.22	18.5197	665.57	22.0235	722.84	0.451823	0.57277	1.78061
	Ceratocarpus arenarius	499.69	0.143024	559.22	14.7759	665.57	19.4137	722.84	0.509145	1.0913	3.52004
	Ceratocarpus arenarius	502.26	0.0980835	559.22	16.3567	665.57	23.2199	722.84	0.77813	0.874102	3.25225
	Ceratocarpus arenarius	502.26	0.114436	559.22	21.4179	665.57	22.2273	722.84	0.328251	0.802939	4.89267
	Ceratocarpus arenarius	502.26	0.086723	559.22	18.728	665.57	13.678	722.84	0.769725	0.754287	7.22107
	Ceratocarpus arenarius	504.82	0.0756986	559.22	28.0478	665.57	30.0542	722.84	0.422043	0.635297	2.71045
	Ceratocarpus arenarius	504.82	0.0985886	559.22	23.8063	665.57	31.2563	722.84	0.387379	0.587587	3.18487
	Ceratocarpus arenarius	507.39	0.0542016	559.22	29.9018	665.57	23.3264	722.84	0.94789	0.666711	3.98492
	Ceratocarpus arenarius	507.39	0.0773625	559.22	25.9405	665.57	21.0885	722.84	0.681772	0.834957	-0.321189
	Ceratocarpus arenarius	507.39	0.0814827	559.22	17.6686	665.57	25.2809	722.84	0.478303	0.635923	1.23481
	Ceratocarpus arenarius	507.39	0.0788778	559.22	17.3423	665.57	21.1492	722.84	1.06893	0.628371	3.60722
	Ceratocarpus arenarius	507.39	0.0910754	559.22	28.3305	665.57	25.4495	722.84	0.588682	0.714452	3.73979
	Ceratocarpus arenarius	509.96	0.073057	559.22	23.3232	665.57	21.8114	722.84	0.461697	0.866157	0.822141
	Ceratocarpus arenarius	512.53	0.104411	559.22	18.1579	665.57	23.1213	722.84	0.231534	0.795336	4.60801
	Ceratocarpus arenarius	512.53	0.0819919	559.22	20.5093	665.57	19.9958	722.84	0.482827	1.23591	2.61126
	Ceratocarpus arenarius	512.53	0.14854	559.22	15.7584	665.57	20.6329	722.84	0.482754	1.11258	5.99796
	Ceratocarpus arenarius	512.53	0.112295	559.22	20.4301	665.57	26.5869	722.84	0.390591	1.41687	5.54834
	Ceratocarpus arenarius	512.53	0.13888	559.22	16.3644	665.57	21.1586	722.84	0.737196	0.619674	5.3212
	Ceratocarpus arenarius	512.53	0.118737	559.22	24.8342	665.57	31.1064	722.84	0.298802	0.653617	2.99305
	Ceratocarpus arenarius	512.53	0.132552	559.22	18.5714	665.57	35.1712	722.84	0.244967	0.760605	2.26599
	Ceratocarpus arenarius	512.53	0.138927	559.22	15.1318	665.57	21.3149	722.84	0.237481	0.504701	2.2509
	Ceratocarpus arenarius	512.53	0.137859	559.22	17.4973	665.57	19.8549	725.59	0.240348	0.758389	2.11663
	Ceratocarpus arenarius	512.53	0.122094	559.22	20.8929	665.57	27.6549	725.59	0.240619	0.610279	3.32972
	Ceratocarpus arenarius	512.53	0.102383	559.22	21.2369	665.57	22.7396	725.59	0.429857	1.11477	5.48999
	Ceratocarpus arenarius	512.53	0.0660468	559.22	26.9674	665.57	31.4211	725.59	0.395145	0.802711	2.61644
	Ceratocarpus arenarius	512.53	0.130521	559.22	24.0137	665.57	22.4382	725.59	0.212088	0.872448	2.96136
	Ceratocarpus arenarius	515.11	0.089165	559.22	25.9314	665.57	26.1154	725.59	0.321358	0.960405	9.41844
	Ceratocarpus arenarius	515.11	0.0987515	559.22	20.4633	665.57	29.9401	725.59	0.280908	0.738701	4.39169
	Ceratocarpus arenarius	515.11	0.131342	559.22	19.8197	665.57	21.5717	725.59	0.189401	0.922859	3.88053
	Ceratocarpus arenarius	515.11	0.103802	559.22	17.1406	665.57	23.2796	725.59	0.321149	0.968686	3.12863
	Ceratocarpus arenarius	515.11	0.121029	559.22	14.5969	665.57	15.7852	725.59	0.250299	1.0158	4.46156
	Ceratocarpus arenarius	515.11	0.0998452	559.22	19.1573	665.57	19.6904	725.59	0.352464	1.2634	1.98458
	Ceratocarpus arenarius	515.11	0.0907984	559.22	18.5103	665.57	26.4532	725.59	0.389811	1.01138	8.37532
	Ceratocarpus arenarius	515.11	0.0961385	559.22	24.5499	665.57	21.9926	725.59	0.490385	0.587943	1.94644
	Ceratocarpus arenarius	515.11	0.121269	559.22	18.7933	665.57	25.6027	725.59	0.54857	0.958081	6.86003
	Ceratocarpus arenarius	515.11	0.0669141	559.22	21.7502	665.57	34.6148	725.59	0.407859	0.639112	2.96136
	Ceratocarpus arenarius	515.11	0.0740912	559.22	24.7736	665.57	24.5458	725.59	0.330884	0.73365	1.61377
	Ceratocarpus arenarius	515.11	0.0715206	559.22	23.5298	665.57	23.7812	725.59	0.197204	0.814607	3.69033
	Ceratocarpus arenarius	515.11	0.0632485	559.22	21.3249	665.57	24.5129	725.59	0.324963	0.769092	5.78197
	Ceratocarpus arenarius	515.11	0.14655	559.22	20.692	665.57	20.164	725.59	0.354422	0.870672	5.29782
	Ceratocarpus arenarius	515.11	0.11279	559.22	26.7758	665.57	19.6736	725.59	0.211008	0.588183	4.09258
	Ceratocarpus arenarius	515.11	0.108527	559.22	23.3763	665.57	15.7664	725.59	0.40098	0.828196	1.49952
	Ceratocarpus arenarius	515.11	0.147878	559.22	15.7277	665.57	16.6449	725.59	0.497862	0.671998	1.98567
	Ceratocarpus arenarius	515.11	0.0862627	559.22	19.8943	665.57	18.3753	725.59	0.412106	0.74053	1.83025
	Ceratocarpus arenarius	515.11	0.125542	559.22	16.3307	665.57	25.952	725.59	0.201079	0.547505	0.912161
	Ceratocarpus arenarius	515.11	0.149886	559.22	15.3845	665.57	22.3598	725.59	0.312686	0.896026	8.25441
	Ceratocarpus arenarius	515.11	0.0687047	559.22	20.3753	665.57	24.305	725.59	0.125951	0.575878	1.35419
	Ceratocarpus arenarius	515.11	0.185809	559.22	19.7318	665.57	25.3961	728.34	0.462823	0.638389	1.51674
	Ceratocarpus arenarius	515.11	0.226269	559.22	20.5053	665.57	23.7795	728.34	0.354841	0.604827	1.00703
	Ceratocarpus arenarius	515.11	0.180525	559.22	15.8237	665.57	22.0665	728.34	0.540517	0.773267	4.19313
	Ceratocarpus arenarius	515.11	0.150281	559.22	19.2382	665.57	26.1508	728.34	0.477574	1.12808	7.64699
	Ceratocarpus arenarius	515.11	0.161593	559.22	16.974	665.57	22.8877	728.34	0.740481	0.494477	0.922189
	Ceratocarpus arenarius	515.11	0.17078	559.22	16.1958	665.57	26.0233	728.34	0.721147	0.583988	2.02675
	Ceratocarpus arenarius	515.11	0.133413	559.22	13.1298	665.57	19.2264	728.34	0.787749	0.636815	2.87864
	Ceratocarpus arenarius	515.11	0.101933	559.22	21.3634	665.57	19.6718	728.34	0.729428	0.816456	3.56112
	Ceratocarpus arenarius	515.11	0.0869063	559.22	14.8039	665.57	35.185	728.34	0.594501	0.91567	4.43819
	Ceratocarpus arenarius	515.11	0.111898	559.22	15.821	665.57	20.9339	728.34	0.35045	0.843513	5.35535
	Ceratocarpus arenarius	515.11	0.123762	559.22	15.2962	665.57	22.1298	728.34	0.212108	1.03797	4.90882
	Ceratocarpus arenarius	515.11	0.0949491	559.22	23.0379	665.57	18.1921	728.34	0.737519	0.92365	1.94539
	Ceratocarpus arenarius	515.11	0.0490859	559.22	24.1167	665.57	18.7924	728.34	0.595016	0.973729	1.83121
	Ceratocarpus arenarius	515.11	0.112804	559.22	14.6581	665.57	25.2772	728.34	0.169982	0.87799	4.19273
	Ceratocarpus arenarius	515.11	0.116204	559.22	13.8542	665.57	24.6575	728.34	0.157739	0.782377	4.75088
	Ceratocarpus arenarius	515.11	0.0672749	559.22	19.1835	665.57	23.5856	728.34	0.795635	0.72378	2.80632
	Ceratocarpus arenarius	515.11	0.14523	559.22	19.2807	665.57	19.7728	728.34	0.668491	0.724576	2.81794
	Ceratocarpus arenarius	515.11	0.12868	559.22	16.3329	665.57	21.2646	728.34	0.577515	0.922823	1.46758
	Ceratocarpus arenarius	515.11	0.102662	559.22	17.9758	665.57	20.9164	728.34	0.194839	0.820141	1.77265
	Ceratocarpus arenarius	515.11	0.0805988	559.22	23.2684	665.57	29.7392	728.34	0.666564	0.726515	3.67639
	Ceratocarpus arenarius	515.11	0.0868941	559.22	20.0043	665.57	21.026	728.34	0.245605	0.864633	2.36573
	Ceratocarpus arenarius	515.11	0.120833	559.22	20.5022	665.57	19.0726	728.34	0.791582	0.832041	2.85786
	Ceratocarpus arenarius	515.11	0.164035	559.22	20.6471	665.57	18.1407	728.34	0.245055	0.676548	2.30936
	Ceratocarpus arenarius	515.11	0.150764	559.22	20.1418	665.57	20.7959	728.34	1.10953	0.73109	2.97634
	Ceratocarpus arenarius	515.11	0.187102	559.22	17.3291	665.57	20.127	728.34	0.756208	0.593319	1.6573
	Ceratocarpus arenarius	515.11	0.101703	559.22	16.2531	665.57	22.5	728.34	1.47108	0.70289	2.15392
	Ceratocarpus arenarius	515.11	0.0851955	559.22	21.5438	665.57	24.0342	728.34	0.555236	0.67345	1.92161
	Ceratocarpus arenarius	515.11	0.138202	559.22	20.0256	665.57	22.5159	728.34	0.582037	1.03139	3.71435
	Ceratocarpus arenarius	515.11	0.158198	559.22	18.2554	665.57	16.9356	728.34	0.214191	1.27011	6.00933
	Ceratocarpus arenarius	515.11	0.0996069	559.22	19.3675	665.57	15.5891	728.34	0.842754	0.685752	1.18866
	Ceratocarpus arenarius	515.11	0.102896	559.22	21.9158	665.57	23.7852	728.34	0.293275	0.783837	3.40723
	Ceratocarpus arenarius	515.11	0.180699	559.22	16.437	668.27	16.896	728.34	0.781167	0.557904	2.59609
	Ceratocarpus arenarius	515.11	0.134536	559.22	17.8865	668.27	18.5247	728.34	0.606305	0.539542	2.49294
	Ceratocarpus arenarius	515.11	0.093167	559.22	12.6796	668.27	20.1058	728.34	0.268841	0.584456	1.85657
	Ceratocarpus arenarius	515.11	0.103927	559.22	16.2477	670.98	21.2984	728.34	0.300676	0.748171	6.07618
	Ceratocarpus arenarius	515.11	0.163224	559.22	15.7405	673.69	17.2737	728.34	0.397709	0.869752	8.42862
	Ceratocarpus arenarius	515.11	0.0572016	559.22	23.9016	673.69	17.0492	728.34	0.772424	0.670442	2.875
	Ceratocarpus arenarius	515.11	0.143876	559.22	31.3045	673.69	19.844	728.34	0.873566	0.916287	3.31176
	Ceratocarpus arenarius	515.11	0.141163	559.22	16.9627	673.69	18.3259	728.34	0.564322	1.03025	3.46964
	Ceratocarpus arenarius	515.11	0.0873055	559.22	17.7502	673.69	17.1409	728.34	0.454128	0.937448	4.3819
	Ceratocarpus arenarius	515.11	0.086664	559.22	15.8467	673.69	24.4951	728.34	0.585864	0.871177	1.51898
	Ceratocarpus arenarius	515.11	0.11102	559.22	15.8754	673.69	16.8453	728.34	0.684607	0.558558	1.90508
	Ceratocarpus arenarius	515.11	0.0856354	559.22	14.9173	673.69	28.4257	728.34	0.737108	0.540623	2.18312
	Ceratocarpus arenarius	515.11	0.105601	559.22	18.8453	673.69	26.2611	728.34	0.55679	0.703118	1.45804
	Ceratocarpus arenarius	515.11	0.081224	559.22	24.4702	673.69	19.0519	728.34	0.874619	0.697346	1.20338
	Ceratocarpus arenarius	515.11	0.191389	559.22	15.3564	673.69	19.0231	728.34	0.276483	0.752434	2.47007
	Ceratocarpus arenarius	515.11	0.243587	559.22	20.0781	676.4	19.2118	728.34	0.824143	1.03799	2.0451
	Ceratocarpus arenarius	515.11	0.0654745	559.22	20.8828	676.4	27.7666	728.34	0.438271	0.812208	-0.403764
	Ceratocarpus arenarius	515.11	0.171214	559.22	21.729	676.4	30.7198	728.34	0.880253	0.635303	4.20582
	Ceratocarpus arenarius	515.11	0.134633	559.22	17.5713	676.4	29.6059	728.34	0.275008	0.813106	5.34241
	Ceratocarpus arenarius	515.11	0.14401	559.22	14.9172	676.4	23.2025	728.34	0.732389	0.888287	-0.383385
	Ceratocarpus arenarius	515.11	0.112558	559.22	15.222	676.4	19.0932	728.34	0.538857	0.711134	-0.0351935
	Ceratocarpus arenarius	515.11	0.0952525	559.22	15.9613	676.4	21.9876	728.34	0.603367	0.753912	4.1451
	Ceratocarpus arenarius	515.11	0.095	559.22	17.4908	676.4	17.587	728.34	0.3442	0.663185	4.75867
	Ceratocarpus arenarius	515.11	0.10466	559.22	17.34	676.4	12.6461	728.34	0.710222	0.71765	5.09304
	Ceratocarpus arenarius	515.11	0.118202	559.22	24.1509	676.4	19.6834	728.34	0.674658	0.68287	4.72262
	Ceratocarpus arenarius	515.11	0.112971	559.22	22.076	676.4	28.7795	728.34	0.680155	0.688185	5.17878
	Ceratocarpus arenarius	517.68	0.0455603	559.22	17.0231	676.4	22.0376	728.34	0.799265	0.59301	0.679122
	Ceratocarpus arenarius	517.68	0.156597	559.22	20.7398	676.4	21.5277	728.34	0.826749	0.618348	4.0202
	Ceratocarpus arenarius	517.68	0.201961	559.22	23.9477	676.4	15.5092	728.34	0.84723	0.558415	2.18326
	Ceratocarpus arenarius	517.68	0.235768	559.22	17.7936	676.4	17.6724	728.34	0.512804	0.658102	2.58398
	Ceratocarpus arenarius	517.68	0.144022	559.22	17.8629	676.4	19.4139	728.34	0.372585	0.813764	1.47545
	Ceratocarpus arenarius	517.68	0.133301	559.22	16.4234	676.4	39.0694	728.34	1.10013	0.578065	2.45565
	Ceratocarpus arenarius	517.68	0.100322	559.22	18.4948	676.4	35.7753	728.34	0.834872	0.707635	2.2363
	Ceratocarpus arenarius	520.26	0.10143	559.22	14.8583	676.4	20.1635	728.34	0.922405	0.602778	1.45125
	Ceratocarpus arenarius	520.26	0.0950468	559.22	15.2641	676.4	20.3765	728.34	0.769969	0.71224	2.94397
	Ceratocarpus arenarius	520.26	0.135438	559.22	19.5844	679.11	21.7875	728.34	0.235259	0.657546	4.7239
	Ceratocarpus arenarius	520.26	0.117035	559.22	17.0564	679.11	13.599	728.34	0.47011	0.625222	4.15698
	Ceratocarpus arenarius	520.26	0.0840122	559.22	18.5945	679.11	18.0585	728.34	0.663202	0.606283	1.82607
	Ceratocarpus arenarius	520.26	0.1028	559.22	15.9531	679.11	15.1022	728.34	0.867764	0.540764	2.38936
	Ceratocarpus arenarius	520.26	0.145668	559.22	19.0693	679.11	13.9375	728.34	0.864193	0.585208	1.69665
	Ceratocarpus arenarius	520.26	0.0923096	559.22	18.2962	679.11	12.4244	728.34	0.669436	0.73334	1.17923
	Ceratocarpus arenarius	520.26	0.0992525	559.22	16.823	679.11	9.05222	728.34	0.847591	0.79843	2.88537
	Ceratocarpus arenarius	520.26	0.162169	559.22	16.4248	679.11	15.5603	728.34	0.865489	0.516629	0.929851
	Ceratocarpus arenarius	520.26	0.159868	559.22	16.4616	679.11	22.629	728.34	0.31212	0.511813	0.885684
	Ceratocarpus arenarius	520.26	0.128978	559.22	14.6404	679.11	27.7254	728.34	0.347187	0.96088	1.63871
	Ceratocarpus arenarius	520.26	0.0894521	559.22	15.0234	679.11	26.6058	728.34	0.36646	1.19505	4.07711
	Ceratocarpus arenarius	520.26	0.097167	559.22	18.5434	679.11	21.9093	728.34	0.377648	1.41898	1.30958
	Ceratocarpus arenarius	520.26	0.313969	559.22	14.5091	679.11	19.0308	728.34	0.524481	1.24018	0.419169
	Ceratocarpus arenarius	520.26	0.161874	559.22	13.8424	679.11	24.3149	728.34	0.665193	0.438682	3.02575
	Ceratocarpus arenarius	520.26	0.112772	559.22	25.7799	679.11	14.3577	728.34	0.586177	1.00848	3.39644
	Ceratocarpus arenarius	520.26	0.122701	559.22	23.3513	679.11	32.1993	728.34	0.314607	1.02707	5.21863
	Ceratocarpus arenarius	520.26	0.128022	559.22	27.2191	679.11	28.011	728.34	0.274941	0.69734	7.22825
	Ceratocarpus arenarius	520.26	0.147817	559.22	26.3374	679.11	18.8502	728.34	0.493477	0.687381	5.11122
	Ceratocarpus arenarius	520.26	0.160466	559.22	12.4468	679.11	18.0556	728.34	0.721756	0.848996	3.71881
	Ceratocarpus arenarius	520.26	0.162462	559.22	25.4738	679.11	18.3163	728.34	0.352422	0.634202	2.38195
	Ceratocarpus arenarius	520.26	0.0925418	559.22	23.5456	679.11	30.5269	728.34	0.333646	0.838489	3.34929
	Ceratocarpus arenarius	520.26	0.177727	559.22	19.0638	679.11	17.2253	728.34	0.880912	0.918627	5.76977
	Ceratocarpus arenarius	520.26	0.0957067	559.22	20.2736	679.11	28.9315	728.34	0.607935	0.429664	2.91531
	Ceratocarpus arenarius	520.26	0.100509	559.22	15.1165	679.11	31.6591	728.34	0.420733	0.860022	2.26093
	Ceratocarpus arenarius	520.26	0.115843	559.22	20.7456	679.11	34.5004	728.34	0.638982	0.942069	3.56809
	Ceratocarpus arenarius	520.26	0.129035	559.22	13.0619	679.11	21.6328	728.34	0.729024	0.659379	2.37542
	Ceratocarpus arenarius	520.26	0.077666	559.22	21.4756	679.11	26.7506	728.34	0.439532	0.969411	3.52281
	Ceratocarpus arenarius	522.84	0.065609	559.22	21.7848	679.11	32.0243	728.34	0.507778	0.780519	2.31144
	Ceratocarpus arenarius	522.84	0.106615	559.22	15.4377	679.11	22.3863	731.1	0.190666	0.661145	3.48618
	Ceratocarpus arenarius	522.84	0.100452	559.22	24.0292	679.11	22.8982	731.1	0.285717	0.496401	3.68616
	Ceratocarpus arenarius	522.84	0.0838167	559.22	17.6475	679.11	26.5759	731.1	0.523493	0.527701	2.39418
	Ceratocarpus arenarius	522.84	0.0888187	559.22	12.8224	679.11	24.1045	731.1	0.319939	0.598548	2.85798
	Ceratocarpus arenarius	522.84	0.0678615	559.22	14.0779	679.11	19.6375	731.1	0.80958	0.877994	4.69948
	Ceratocarpus arenarius	522.84	0.118819	559.22	21.4163	679.11	26.6202	733.86	0.11824	0.592811	2.75379
	Ceratocarpus arenarius	522.84	0.115623	559.22	16.8716	679.11	19.6687	733.86	0.282959	0.970279	7.66068
	Ceratocarpus arenarius	522.84	0.0720265	559.22	21.803	679.11	30.3265	733.86	0.166794	0.58777	3.72529
	Ceratocarpus arenarius	522.84	0.0760346	559.22	18.6553	679.11	28.9693	733.86	0.101338	0.758102	4.62184
	Ceratocarpus arenarius	522.84	0.0990285	559.22	23.8154	679.11	31.1797	744.91	0.373295	0.655206	3.2345
	Ceratocarpus arenarius	522.84	0.106523	559.22	22.4531	679.11	23.0004	744.91	0.281745	0.775717	3.89611
	Ceratocarpus arenarius	522.84	0.0727312	559.22	22.7218	679.11	20.9487	744.91	0.597699	0.639018	2.65069
	Ceratocarpus arenarius	522.84	0.150971	559.22	17.9869	679.11	24.0329	744.91	0.563265	0.560493	2.52776
	Ceratocarpus arenarius	522.84	0.0976904	559.22	17.3182	679.11	18.6429	744.91	0.359831	0.904745	1.85179
	Ceratocarpus arenarius	522.84	0.0816171	559.22	19.3944	679.11	21.6069	744.91	0.372935	0.783	2.92145
	Ceratocarpus arenarius	522.84	0.0859043	559.22	19.6646	679.11	18.7054	744.91	0.41977	0.811941	1.63481
	Ceratocarpus arenarius	522.84	0.135876	559.22	19.5946	679.11	19.4592	747.68	0.1601	0.838572	3.22829
	Ceratocarpus arenarius	522.84	0.10002	559.22	17.4255	679.11	17.5023	747.68	0.46779	0.861859	4.83993
	Ceratocarpus arenarius	522.84	0.0818493	559.22	20.5021	679.11	17.7443	747.68	0.235843	0.567371	1.93731
	Ceratocarpus arenarius	522.84	0.081664	559.22	13.3783	679.11	16.7769	750.45	0.275959	0.535507	1.00878
	Ceratocarpus arenarius	522.84	0.0839328	559.22	14.1899	679.11	31.9305	753.23	0.108523	0.556725	0.977741
	Ceratocarpus arenarius	522.84	0.0567862	559.22	13.1327	679.11	21.1327	753.23	0.360556	0.979371	5.2542
	Ceratocarpus arenarius	522.84	0.145735	559.22	21.3808	679.11	25.4719	753.23	0.164086	0.607529	1.90839
	Ceratocarpus arenarius	522.84	0.102782	559.22	12.6194	679.11	22.8591	756.01	0.353312	0.772134	5.62188
	Ceratocarpus arenarius	522.84	0.0916517	559.22	18.4012	679.11	21.6767	758.78	0.28701	0.79621	3.09769
	Ceratocarpus arenarius	522.84	0.130631	559.22	12.8516	679.11	15.7674	758.78	0.410564	0.559662	1.18963
	Petrosimonia sibirica	520.26	0.120482	551.39	16.1095	641.32	11.1136	703.64	0.608091	0.802333	5.87291
	Petrosimonia sibirica	520.26	0.146478	553.99	13.5319	641.32	15.1106	706.37	0.551853	1.16101	7.76533
	Petrosimonia sibirica	522.84	0.127917	556.6	18.6344	641.32	19.486	709.11	1.2027	0.827446	8.63376
	Petrosimonia sibirica	525.43	0.1453	559.22	16.2925	641.32	18.2506	711.85	1.50338	0.74474	6.48008
	Petrosimonia sibirica	525.43	0.15645	559.22	17.965	644.01	16.2375	717.34	1.30387	1.93965	17.8525
	Petrosimonia sibirica	525.43	0.29527	559.22	22.9543	644.01	16.7112	720.09	0.894508	1.45988	15.196
	Petrosimonia sibirica	525.43	0.18821	559.22	22.6467	644.01	19.492	722.84	0.743149	1.23	8.50932
	Petrosimonia sibirica	525.43	0.137246	559.22	14.6003	644.01	13.9728	722.84	0.562373	1.0912	7.73234
	Petrosimonia sibirica	525.43	0.364357	559.22	26.1623	644.01	21.6123	728.34	0.536885	2.52726	20.8002
	Petrosimonia sibirica	525.43	0.234946	559.22	26.998	644.01	24.5205	728.34	0.673558	1.87119	17.9817
	Bare land	492.02	0.0963125	551.39	13.1239	654.77	16.4314	687.27	0.0971734	0.921772	0.706667
	Bare land	492.02	0.0711996	553.99	7.53144	660.16	24.4736	689.99	0.0942359	0.343596	1.36899
	Bare land	492.02	0.0450389	556.6	9.96961	660.16	13.2336	689.99	0.106026	0.307633	0.909143
	Bare land	492.02	0.0666145	556.6	7.62	660.16	12.0164	689.99	0.142397	0.736065	0.281754
	Bare land	492.02	0.0527234	559.22	21.4357	660.16	12.8517	689.99	0.237855	0.573823	0.35131
	Bare land	492.02	0.0665179	559.22	19.6282	660.16	28.3878	689.99	0.161883	0.619264	0.358143
	Bare land	492.02	0.133373	559.22	12.1458	660.16	12.7394	689.99	0.102079	0.656135	0.412508
	Bare land	492.02	0.0585456	559.22	7.77936	660.16	23.312	689.99	0.282851	0.421848	0.318589
	Bare land	492.02	0.0678347	559.22	7.33977	660.16	16.9851	689.99	0.138792	0.297779	0.24751
	Bare land	492.02	0.0663387	559.22	14.8849	660.16	20.7696	689.99	0.116147	0.531622	0.877173
	Bare land	492.02	0.152456	559.22	11.3201	660.16	25.5834	689.99	0.151835	0.326257	0.103119
	Bare land	492.02	0.0818508	559.22	13.3236	660.16	29.9536	689.99	0.231859	0.394418	0.209855
	Bare land	492.02	0.0748125	559.22	9.11935	660.16	30.0752	692.71	0.0938669	0.4523	1.78482
	Bare land	492.02	0.0508567	559.22	10.425	660.16	27.8293	692.71	0.201036	0.512857	0.232804
	Bare land	492.02	0.109476	559.22	14.5259	660.16	28.6263	692.71	0.134292	0.762891	0.724056
	Bare land	492.02	0.0482625	559.22	15.4327	660.16	13.6292	692.71	0.140948	0.251943	0.496861
	Bare land	492.02	0.103734	559.22	10.4412	660.16	26.0642	692.71	0.176411	0.293106	0.136809
	Bare land	492.02	0.0985141	559.22	10.487	660.16	18.6735	692.71	0.211415	0.340517	0.397252
	Bare land	492.02	0.0998911	559.22	14.5965	660.16	19.9083	692.71	0.195649	0.300039	0.272413
	Bare land	492.02	0.077123	559.22	5.63072	660.16	30.1434	692.71	0.299516	0.29127	0.608197
	Bare land	492.02	0.0714637	559.22	7.79372	660.16	16.6213	692.71	0.156821	0.344446	0.42971
	Bare land	492.02	0.140659	559.22	8.84431	660.16	32.2896	692.71	0.196127	0.378044	1.52765
	Bare land	492.02	0.118667	559.22	7.70452	660.16	22.806	692.71	0.258821	0.313166	1.19664
	Bare land	492.02	0.0368438	559.22	20.5207	662.86	20.2811	692.71	0.15426	0.974411	1.48572
	Bare land	492.02	0.0963427	559.22	6.82636	662.86	17.4306	692.71	0.104077	0.498205	0.910655
	Bare land	492.02	0.0749919	559.22	7.54806	662.86	31.8696	692.71	0.165722	0.480781	0.817448
	Bare land	492.02	0.103833	559.22	9.25058	665.57	25.66	692.71	0.160141	0.310695	0.523039
	Bare land	492.02	0.0657097	559.22	8.47172	665.57	12.8996	692.71	0.158488	0.276994	0.619911
	Bare land	492.02	0.0454639	559.22	21.8437	665.57	10.5456	692.71	0.180365	1.21456	1.41575
	Bare land	492.02	0.0408155	559.22	10.4438	665.57	23.8625	692.71	0.279026	0.299167	0.785859
	Bare land	492.02	0.05305	559.22	10.1911	665.57	10.092	692.71	0.248161	0.218369	0.184404
	Bare land	492.02	0.0947157	559.22	7.25117	665.57	8.14045	692.71	0.251673	0.34496	0.578307
	Bare land	492.02	0.105575	559.22	7.01979	665.57	9.11881	692.71	0.200899	0.143962	0.0960036
	Bare land	492.02	0.0975726	559.22	23.235	665.57	20.7318	692.71	0.23904	0.35085	1.56154
	Bare land	492.02	0.0876149	559.22	7.39388	665.57	30.4227	692.71	0.280214	0.406374	-0.246325
	Bare land	492.02	0.045269	559.22	6.37559	665.57	12.8217	692.71	0.120329	0.279776	0.110141
	Bare land	492.02	0.0485927	559.22	7.45918	665.57	14.8364	692.71	0.202089	0.576815	1.53547
	Bare land	494.57	0.122776	559.22	4.02711	665.57	24.2757	692.71	0.153502	0.613339	0.916817
	Bare land	494.57	0.109762	559.22	6.82719	665.57	16.0219	692.71	0.33724	1.05937	0.950726
	Bare land	494.57	0.0750409	559.22	9.51907	665.57	24.8513	695.44	0.247923	1.57644	1.62063
	Bare land	494.57	0.0887077	559.22	7.09594	665.57	13.9604	695.44	0.445252	1.0973	-0.267456
	Bare land	494.57	0.0976815	559.22	15.4779	665.57	14.9472	695.44	0.338966	0.522526	0.27825
	Bare land	494.57	0.0633425	559.22	18.7617	665.57	30.0984	695.44	0.396101	0.550952	1.65312
	Bare land	494.57	0.0466044	559.22	20.7163	665.57	15.7722	695.44	0.10798	0.280257	0.573794
	Bare land	494.57	0.0570085	559.22	28.886	665.57	19.8007	695.44	0.110807	0.782583	1.22511
	Bare land	494.57	0.0616867	559.22	23.4814	665.57	23.9712	695.44	0.229837	0.709367	3.08284
	Bare land	494.57	0.142022	559.22	9.48382	665.57	18.7876	695.44	0.339617	0.662418	2.33299
	Bare land	494.57	0.0338665	559.22	9.36159	665.57	16.5364	695.44	0.123679	0.834196	0.263492
	Bare land	494.57	0.0356514	559.22	8.52623	665.57	12.2112	695.44	0.202183	0.551497	0.103476
	Bare land	494.57	0.0810375	559.22	17.8358	665.57	17.6675	695.44	0.150325	0.427777	2.41294
	Bare land	494.57	0.050875	559.22	12.8777	665.57	22.4721	695.44	0.187258	1.03598	1.12426
	Bare land	494.57	0.0292756	559.22	12.4462	665.57	25.0538	695.44	0.241264	0.548209	2.26078
	Bare land	494.57	0.0249847	559.22	16.4523	665.57	25.1013	695.44	0.194486	0.401388	1.16858
	Bare land	494.57	0.0351627	559.22	11.0597	665.57	12.8994	695.44	0.199194	0.454163	1.52151
	Bare land	494.57	0.0532004	559.22	19.7784	665.57	36.6396	695.44	0.205532	0.798829	0.0325403
	Bare land	494.57	0.133786	559.22	11.6413	665.57	14.2392	695.44	0.172792	0.715909	0.257375
	Bare land	494.57	0.0545585	559.22	8.8456	665.57	26.4144	695.44	0.185056	0.514347	2.42662
	Bare land	494.57	0.0649585	559.22	10.002	665.57	22.8275	695.44	0.240431	0.380948	0.812065
	Bare land	494.57	0.119778	559.22	17.4116	665.57	21.1892	695.44	0.267877	0.272418	0.0165786
	Bare land	494.57	0.109325	559.22	13.756	665.57	26.7798	695.44	0.410153	0.385099	0.401942
	Bare land	494.57	0.0985423	559.22	10.2168	665.57	19.3347	695.44	0.548355	0.694968	2.32039
	Bare land	494.57	0.144659	559.22	8.73226	665.57	23.2964	695.44	0.184034	0.8358	0.0138548
	Bare land	494.57	0.149817	559.22	10.6807	665.57	25.9329	695.44	0.258353	1.0476	2.12552
	Bare land	494.57	0.151171	559.22	12.0214	665.57	24.3547	695.44	0.229327	0.329317	0.230661
	Bare land	494.57	0.117179	559.22	18.4505	665.57	26.8186	695.44	0.409581	0.918754	-0.410704
	Bare land	494.57	0.112169	559.22	19.3958	665.57	17.3883	695.44	0.314194	0.518194	0.395905
	Bare land	494.57	0.0981149	559.22	10.2571	665.57	14.889	695.44	0.284292	0.603514	0.497796
	Bare land	494.57	0.0844032	559.22	20.3957	665.57	18.3609	695.44	0.552823	0.850042	0.882313
	Bare land	494.57	0.127435	559.22	13.2947	665.57	27.3377	695.44	0.126631	0.46581	0.598198
	Bare land	494.57	0.0560417	559.22	14.3989	665.57	27.8396	695.44	0.284887	0.519813	0.665083
	Bare land	494.57	0.0763246	559.22	20.9154	665.57	23.619	695.44	0.298048	0.415302	0.191982
	Bare land	494.57	0.0542917	559.22	10.7159	665.57	32.8525	695.44	0.389083	0.528724	0.390042
	Bare land	494.57	0.119097	559.22	13.0341	665.57	33.177	695.44	0.651998	0.722653	1.59493
	Bare land	494.57	0.0458974	559.22	10.179	665.57	14.4001	695.44	0.530558	0.418762	0.724804
	Bare land	494.57	0.0684173	559.22	14.325	665.57	12.9674	695.44	0.25679	0.461828	0.212028
	Bare land	494.57	0.104917	559.22	14.5136	665.57	17.1612	695.44	0.227317	0.460995	1.3959
	Bare land	494.57	0.0581331	559.22	12.9812	665.57	16.3541	695.44	0.392415	0.759871	-0.103069
	Bare land	494.57	0.045774	559.22	10.7043	665.57	21.6376	695.44	0.136058	0.500056	0.156944
	Bare land	497.13	0.0414863	559.22	18.1385	665.57	36.6367	695.44	0.163802	0.414214	1.41971
	Bare land	497.13	0.0472284	559.22	15.3083	665.57	21.9424	695.44	0.534738	0.326928	0.372948
	Bare land	497.13	0.0499232	559.22	19.9448	665.57	18.6474	695.44	0.19355	0.85451	1.88102
	Bare land	497.13	0.0281163	559.22	11.0516	665.57	24.195	695.44	0.532776	0.621261	2.31995
	Bare land	497.13	0.056579	559.22	11.3675	665.57	22.6875	695.44	0.276135	0.787319	1.10747
	Bare land	497.13	0.130788	559.22	15.2822	665.57	35.6749	695.44	0.400226	0.740018	1.14902
	Bare land	497.13	0.0468641	559.22	12.5788	665.57	25.1088	695.44	0.353847	0.382613	0.780835
	Bare land	497.13	0.118587	559.22	17.7136	665.57	19.3849	695.44	0.795438	0.882494	-0.010506
	Bare land	497.13	0.10095	559.22	17.8039	665.57	20.4272	695.44	0.768208	1.02774	0.823216
	Bare land	497.13	0.0666411	559.22	10.4332	665.57	18.538	695.44	0.243147	0.861331	0.776821
	Bare land	497.13	0.0883508	559.22	18.4926	665.57	14.2171	695.44	0.399675	0.546556	0.909409
	Bare land	497.13	0.0903206	559.22	21.3591	665.57	28.4463	695.44	0.188637	0.908038	1.08284
	Bare land	497.13	0.0545605	559.22	16.9196	665.57	27.9823	695.44	0.127133	0.550343	0.926188
	Bare land	497.13	0.104339	559.22	14.1131	665.57	18.764	695.44	0.128117	1.19939	2.61816
	Bare land	497.13	0.0726958	559.22	19.168	665.57	13.476	695.44	0.158804	0.717558	1.80575
	Bare land	497.13	0.0647772	559.22	13.3791	665.57	18.7627	695.44	0.292855	0.549815	0.815169
	Bare land	497.13	0.0627137	559.22	21.994	665.57	24.9071	695.44	0.163155	0.509239	1.4767
	Bare land	497.13	0.0736774	559.22	14.8895	665.57	26.8442	695.44	0.137401	0.974649	2.4012
	Bare land	497.13	0.0702722	559.22	11.5607	665.57	19.7341	695.44	0.281484	0.613909	2.04083
	Bare land	497.13	0.0773448	559.22	10.5553	665.57	28.847	695.44	0.463641	0.842863	0.986617
	Bare land	497.13	0.0706895	559.22	18.2291	665.57	11.0983	695.44	0.194389	0.627214	0.87926
	Bare land	497.13	0.0977863	559.22	18.5171	665.57	10.9011	698.17	0.222355	0.594373	0.816736
	Bare land	497.13	0.127994	559.22	14.45	665.57	25.8248	698.17	0.840492	0.582782	0.953534
	Bare land	497.13	0.108111	559.22	13.7428	665.57	25.9404	698.17	0.176752	0.950573	1.56573
	Bare land	497.13	0.0967581	559.22	12.0299	668.27	16.4598	698.17	0.207341	0.571976	0.811923
	Bare land	497.13	0.136315	559.22	16.1546	668.27	23.4799	698.17	0.210018	1.07637	2.35044
	Bare land	497.13	0.103637	559.22	12.9574	670.98	26.2209	698.17	0.315484	0.988099	1.89918
	Bare land	497.13	0.0505625	559.22	21.6496	670.98	21.7629	698.17	0.283546	0.776573	1.01872
	Bare land	497.13	0.0380603	559.22	20.9866	670.98	14.1939	698.17	0.238034	0.376375	0.79476
	Bare land	497.13	0.110766	559.22	16.925	670.98	16.5806	698.17	0.327532	0.642603	0.953988
	Bare land	497.13	0.160304	559.22	11.4551	670.98	14.6157	698.17	0.405379	0.504355	0.773845
	Bare land	497.13	0.169879	559.22	13.801	670.98	23.4647	698.17	0.551629	1.17289	2.8017
	Bare land	497.13	0.0714393	559.22	12.7762	670.98	14.45	698.17	0.128817	0.917218	2.45326
	Bare land	497.13	0.169264	559.22	24.1735	670.98	19.99	698.17	0.337917	1.17736	0.707798
	Bare land	497.13	0.113026	559.22	16.0959	673.69	11.7287	698.17	0.220857	0.879222	2.50033
	Bare land	497.13	0.0756512	559.22	21.9865	673.69	7.36002	698.17	0.515683	0.878298	0.404
	Bare land	497.13	0.085752	559.22	16.5107	673.69	27.7035	698.17	0.225298	1.11276	1.54031
	Bare land	497.13	0.0754627	559.22	16.9919	673.69	8.65522	698.17	0.232911	0.955067	-0.210744
	Bare land	497.13	0.0874234	559.22	21.2702	673.69	8.23662	698.17	0.487268	0.62094	0.52424
	Bare land	497.13	0.074998	559.22	18.7206	673.69	22.0781	698.17	0.307974	0.327458	0.478556
	Bare land	497.13	0.0867742	559.22	13.2963	673.69	16.0596	698.17	0.155006	0.895347	2.17068
	Bare land	497.13	0.0866976	559.22	9.86708	673.69	15.7813	698.17	0.106456	0.862978	2.23775
	Bare land	497.13	0.106583	559.22	17.175	673.69	9.12852	698.17	0.382417	0.418709	0.0875907
	Bare land	497.13	0.111786	559.22	16.1348	673.69	14.7853	698.17	0.32154	0.371806	0.273212
	Bare land	497.13	0.107754	559.22	10.9751	673.69	16.0343	698.17	0.475903	1.03407	0.21347
	Bare land	497.13	0.0517742	559.22	11.4983	673.69	15.4165	698.17	0.388569	1.19072	0.874968
	Bare land	497.13	0.0971653	559.22	23.2977	673.69	14.4583	698.17	0.620435	0.48823	0.963978
	Bare land	497.13	0.0917298	559.22	24.6857	673.69	15.4617	698.17	0.22995	1.39338	1.66624
	Bare land	499.69	0.0364887	559.22	12.6934	673.69	27.3538	698.17	0.704302	0.657115	0.545032
	Bare land	499.69	0.0542198	559.22	23.8131	673.69	21.0874	698.17	0.128371	0.70319	0.0130484
	Bare land	499.69	0.0503966	559.22	15.8506	673.69	13.7996	698.17	0.369032	0.654282	1.10303
	Bare land	499.69	0.105089	559.22	19.0154	673.69	17.4665	698.17	0.419536	0.510619	-0.0479476
	Bare land	499.69	0.0911996	559.22	15.4491	673.69	18.0816	698.17	0.544284	0.502784	0.0843629
	Bare land	499.69	0.107337	559.22	13.7808	673.69	9.83609	698.17	0.595498	0.529115	0.564065
	Bare land	499.69	0.0798992	559.22	13.3408	673.69	22.6746	698.17	0.791609	0.298526	0.208722
	Bare land	499.69	0.0530563	559.22	12.9759	673.69	20.611	698.17	0.57154	0.553119	0.377581
	Bare land	499.69	0.0779758	559.22	9.63982	676.4	8.7332	698.17	0.392833	0.810409	0.301181
	Bare land	499.69	0.0772117	559.22	14.1594	676.4	9.49424	698.17	0.324772	0.794867	-0.52702
	Bare land	499.69	0.0807077	559.22	17.8222	676.4	11.5933	698.17	0.404883	0.780506	0.11369
	Bare land	499.69	0.12806	559.22	19.8898	676.4	11.9353	698.17	0.327454	0.40191	0.687194
	Bare land	499.69	0.139774	559.22	19.146	676.4	13.721	698.17	0.396734	1.36164	0.295591
	Bare land	499.69	0.0526282	559.22	10.9393	676.4	11.9417	698.17	0.337548	0.528164	1.04237
	Bare land	499.69	0.0716754	559.22	28.3981	676.4	13.1941	698.17	0.384982	1.1062	-0.528393
	Bare land	499.69	0.123776	559.22	11.4789	676.4	21.9028	698.17	0.204044	1.15452	-0.256704
	Bare land	499.69	0.104022	559.22	24.8203	676.4	18.0244	698.17	0.118067	0.907607	0.0138589
	Bare land	499.69	0.13681	559.22	25.1858	676.4	10.8081	698.17	0.144603	0.825496	0.453264
	Bare land	499.69	0.204292	559.22	21.5133	676.4	17.3637	698.17	0.334185	0.836127	0.831522
	Bare land	499.69	0.210262	559.22	19.8785	676.4	16.5593	700.9	0.0416206	0.574994	0.027875
	Bare land	499.69	0.0727054	559.22	15.0181	676.4	21.8474	700.9	0.0828266	0.406581	0.629708
	Bare land	499.69	0.163782	559.22	13.1829	676.4	27.5146	703.64	0.0916411	0.48215	0.299006
	Bare land	502.26	0.0489887	559.22	12.2046	676.4	22.0436	703.64	0.0727409	0.973869	0.992893
	Bare land	502.26	0.107726	559.22	20.9553	676.4	19.8624	703.64	0.0826371	1.12875	0.877117
	Bare land	504.82	0.0648226	559.22	18.4816	676.4	15.8679	709.11	0.192425	1.05136	1.23318
	Bare land	504.82	0.0644052	559.22	20.4426	676.4	21.9661	722.84	0.351502	0.84699	0.0696593
	Bare land	504.82	0.125663	559.22	20.4761	676.4	31.963	722.84	0.396784	1.51143	1.24896
	Bare land	504.82	0.0705282	559.22	19.0553	676.4	26.5474	722.84	0.354667	0.744048	0.440712
	Bare land	504.82	0.0772198	559.22	32.311	676.4	26.5125	722.84	0.54856	0.614794	0.183669
	Bare land	504.82	0.0918246	559.22	15.5841	676.4	19.4238	722.84	0.34878	0.986252	-0.00276411
	Bare land	504.82	0.092502	559.22	13.6991	676.4	19.6036	722.84	0.674746	0.525012	0.579504
	Bare land	504.82	0.0668556	559.22	20.7739	676.4	25.6787	722.84	0.530988	0.721976	0.888659
	Bare land	504.82	0.0692278	559.22	13.7607	676.4	24.8784	722.84	0.588903	0.892863	0.355794
	Bare land	507.39	0.0479762	559.22	14.2297	676.4	23.8079	722.84	0.488522	0.783522	0.667425
	Bare land	507.39	0.102643	559.22	19.4354	676.4	37.7416	722.84	0.603129	0.717202	0.7108
	Bare land	507.39	0.062879	559.22	15.6615	676.4	26.2379	722.84	0.676677	0.896363	1.81695
	Bare land	507.39	0.12949	559.22	15.448	676.4	14.0073	722.84	0.609925	0.614871	0.949605
	Bare land	507.39	0.0895625	559.22	15.0807	676.4	30.2123	722.84	0.662103	0.717423	0.949692
	Bare land	507.39	0.133794	559.22	13.5689	676.4	13.687	722.84	0.191119	0.940272	0.279845
	Bare land	507.39	0.0798226	559.22	15.6228	676.4	12.0268	722.84	0.360619	0.4035	0.00762702
	Bare land	509.96	0.134153	559.22	19.5639	676.4	17.0184	722.84	0.421738	0.778615	0.222476
	Bare land	509.96	0.123863	559.22	10.4763	676.4	18.8817	722.84	0.469857	1.03792	1.27952
	Bare land	512.53	0.0921512	559.22	16.1903	676.4	13.7643	722.84	0.283567	0.384494	0.190548
	Bare land	512.53	0.0425595	559.22	19.8697	676.4	36.6614	722.84	0.394222	0.408219	0.999325
	Bare land	512.53	0.0843609	559.22	11.1489	676.4	22.805	722.84	0.205704	0.544998	0.094623
	Bare land	512.53	0.0614012	559.22	10.7423	676.4	24.7211	722.84	0.238224	0.35778	-0.0647137
	Bare land	512.53	0.0580645	559.22	13.4981	676.4	21.2329	722.84	0.311752	0.905641	0.184738
	Bare land	512.53	0.100014	559.22	11.5593	676.4	18.9541	722.84	0.555806	0.939843	0.165512
	Bare land	512.53	0.0624698	559.22	20.4249	676.4	16.0904	722.84	0.623032	0.41827	0.245931
	Bare land	512.53	0.21078	559.22	20.5482	676.4	21.2264	722.84	0.524046	1.13535	1.62568
	Bare land	512.53	0.131145	559.22	10.5528	676.4	16.6316	722.84	0.435857	0.724058	0.928778
	Bare land	512.53	0.0801089	559.22	19.2403	676.4	23.4258	722.84	0.557383	0.762137	0.492984
	Bare land	512.53	0.0659415	559.22	13.6918	676.4	30.4581	722.84	0.704714	0.784069	1.11844
	Bare land	512.53	0.122214	559.22	16.0601	676.4	15.7558	722.84	1.01913	0.828409	0.730093
	Bare land	515.11	0.0911835	559.22	19.4063	676.4	30.4235	722.84	0.204919	0.699768	0.384038
	Bare land	515.11	0.10476	559.22	18.5184	676.4	15.7366	725.59	0.102323	0.663861	1.04532
	Bare land	515.11	0.10948	559.22	15.9681	676.4	13.6626	725.59	0.110417	1.01495	-0.325264
	Bare land	515.11	0.178397	559.22	15.0218	676.4	23.3024	725.59	0.102494	0.957556	-0.763544
	Bare land	515.11	0.112347	559.22	26.3957	676.4	15.1903	725.59	0.0967097	0.820004	0.729673
	Bare land	515.11	0.112669	559.22	27.0394	676.4	18.2787	725.59	0.111744	0.420742	-0.106581
	Bare land	515.11	0.0611089	559.22	19.2818	679.11	26.7555	725.59	0.163435	1.13793	1.60682
	Bare land	517.68	0.153387	559.22	12.0907	679.11	15.7836	725.59	0.161399	0.417587	0.208097
	Bare land	517.68	0.0491371	559.22	22.5112	679.11	10.5437	725.59	0.23997	0.315121	0.334267
[truncated: 725 more rows]

## Sheet: Vegetation index
Month	Species	NDVI	RVI	DVI	ANVI	VNVI	EVI	NDGI	RI	PRI	PSRI	RENDVI	VOG
April	Seriphidium transiliense	0.676961	5.1912	46.7695	0.727052	0.649535	2.04346	0.0489491	-0.0489491	-0.0519118	-0.537382	0.518076	1.64624
	Seriphidium transiliense	0.584647	3.81518	33.7155	0.642654	0.533652	1.91563	0.0741207	-0.0741207	-0.0576593	-0.613043	0.427383	1.36245
	Seriphidium transiliense	0.588352	3.85851	42.4809	0.647217	0.573113	1.91693	0.022991	-0.022991	-0.0568579	-0.38649	0.42666	1.45156
	Seriphidium transiliense	0.583265	3.79921	43.9763	0.644253	0.565355	1.89242	0.0267212	-0.0267212	-0.0516445	-0.384299	0.434333	1.44761
	Seriphidium transiliense	0.635343	4.48461	62.2183	0.692011	0.600614	1.9717	0.0561597	-0.0561597	-0.0536835	-0.553355	0.483673	1.49825
	Seriphidium transiliense	0.624453	4.32556	47.4453	0.68678	0.597629	1.90183	0.0427942	-0.0427942	-0.0512016	-0.491806	0.467661	1.47962
	Seriphidium transiliense	0.601288	4.01615	35.1604	0.661592	0.566714	1.90062	0.0524453	-0.0524453	-0.0559756	-0.518065	0.44155	1.4289
	Seriphidium transiliense	0.678943	5.22942	52.9468	0.73935	0.646557	1.94656	0.0577262	-0.0577262	-0.0619077	-0.628267	0.507527	1.57411
	Seriphidium transiliense	0.596016	3.9507	33.3293	0.650024	0.568386	1.96474	0.0417861	-0.0417861	-0.0407873	-0.45175	0.425698	1.41618
	Seriphidium transiliense	0.538366	3.33244	49.3294	0.593767	0.521522	1.93774	0.0234208	-0.0234208	-0.0321873	-0.352929	0.377439	1.35238
	Seriphidium transiliense	0.51623	3.1342	54.6794	0.576818	0.512442	1.86254	0.00515044	-0.00515044	-0.0352186	-0.276933	0.364054	1.34179
	Seriphidium transiliense	0.591916	3.90096	27.6301	0.674585	0.614858	1.67859	-0.0360683	0.0360683	-0.0429636	-0.214345	0.386451	1.38044
	Seriphidium transiliense	0.552989	3.47416	35.2259	0.612147	0.548719	1.88824	0.00613081	-0.00613081	-0.0403045	-0.293391	0.372593	1.33783
	Seriphidium transiliense	0.566141	3.6098	37.0702	0.639095	0.575174	1.75436	-0.0133938	0.0133938	-0.0423349	-0.253451	0.402385	1.51974
	Seriphidium transiliense	0.504415	3.03563	35.3526	0.580718	0.510223	1.66623	-0.00782132	0.00782132	-0.0456229	-0.26509	0.351966	1.39254
	Seriphidium transiliense	0.486297	2.8933	35.2477	0.557348	0.479489	1.7031	0.00887824	-0.00887824	-0.0364282	-0.305022	0.322017	1.27432
	Seriphidium transiliense	0.523757	3.19953	36.7227	0.567613	0.488203	2.08242	0.0477679	-0.0477679	-0.0384491	-0.406227	0.350701	1.2996
	Seriphidium transiliense	0.512044	3.09873	34.0461	0.57136	0.494168	1.86007	0.0239324	-0.0239324	-0.0449261	-0.349309	0.319304	1.29308
	Seriphidium transiliense	0.499185	2.99349	40.2	0.54786	0.47755	2.00557	0.0284068	-0.0284068	-0.0392088	-0.33189	0.317547	1.29416
	Seriphidium transiliense	0.582753	3.79333	30.5039	0.646885	0.576387	1.84508	0.00958658	-0.00958658	-0.0394224	-0.335564	0.407079	1.44317
	Seriphidium transiliense	0.521834	3.18264	43.0707	0.577607	0.513474	1.91976	0.0114191	-0.0114191	-0.027179	-0.285126	0.361774	1.40377
	Seriphidium transiliense	0.636136	4.49657	36.3784	0.6641	0.582448	2.30923	0.085289	-0.085289	-0.05011	-0.6197	0.510213	1.5649
	Seriphidium transiliense	0.579786	3.75948	34.8721	0.641153	0.56363	1.87802	0.0239976	-0.0239976	-0.0414227	-0.397722	0.393592	1.39389
	Seriphidium transiliense	0.563282	3.57962	32.3097	0.616261	0.54465	1.963	0.0268788	-0.0268788	-0.0332194	-0.368143	0.380702	1.41636
	Seriphidium transiliense	0.525258	3.21281	25.6372	0.573863	0.498756	1.99359	0.0359088	-0.0359088	-0.0281408	-0.376293	0.336705	1.34783
	Seriphidium transiliense	0.521037	3.17569	26.8398	0.562884	0.48635	2.09581	0.0464606	-0.0464606	-0.0301142	-0.408403	0.342734	1.30489
	Seriphidium transiliense	0.630361	4.41069	41.5971	0.683143	0.602934	1.99912	0.0442419	-0.0442419	-0.0417332	-0.480248	0.468695	1.60971
	Seriphidium transiliense	0.654764	4.79313	47.0291	0.697226	0.624249	2.12581	0.0516084	-0.0516084	-0.054429	-0.500966	0.519908	1.64739
	Seriphidium transiliense	0.608105	4.10341	49.0917	0.667927	0.594251	1.9207	0.0216922	-0.0216922	-0.0382476	-0.393557	0.446929	1.57923
	Seriphidium transiliense	0.645904	4.64818	29.7528	0.70347	0.614951	1.93955	0.0513474	-0.0513474	-0.0459343	-0.526079	0.495324	1.61869
	Seriphidium transiliense	0.536386	3.31393	36.1319	0.580591	0.493325	2.07875	0.0585554	-0.0585554	-0.0400687	-0.476503	0.372891	1.39717
	Seriphidium transiliense	0.603717	4.04689	37.3213	0.652168	0.584848	2.03747	0.0291678	-0.0291678	-0.0313672	-0.381016	0.442587	1.48544
	Seriphidium transiliense	0.602194	4.02758	30.4622	0.654928	0.589186	1.977	0.0201616	-0.0201616	-0.0298631	-0.3493	0.435203	1.4778
	Seriphidium transiliense	0.617925	4.23458	37.7809	0.657654	0.557844	2.15001	0.0916855	-0.0916855	-0.0546972	-0.651545	0.458736	1.48155
	Seriphidium transiliense	0.615318	4.19909	26.4333	0.681192	0.598082	1.83941	0.0272723	-0.0272723	-0.0527073	-0.411608	0.449208	1.47811
	Seriphidium transiliense	0.592974	3.91369	33.9722	0.644132	0.568232	1.99778	0.037315	-0.037315	-0.0377015	-0.416135	0.434946	1.44226
	Seriphidium transiliense	0.687647	5.40302	27.6633	0.738874	0.669556	2.00981	0.0335285	-0.0335285	-0.0391602	-0.46785	0.538319	1.7317
	Seriphidium transiliense	0.696436	5.58839	28.5685	0.754762	0.688188	1.94706	0.0158387	-0.0158387	-0.0411414	-0.42909	0.547205	1.77311
	Seriphidium transiliense	0.574016	3.69501	28.8537	0.620425	0.546014	2.04359	0.0407838	-0.0407838	-0.0361846	-0.410042	0.403404	1.39939
	Seriphidium transiliense	0.572416	3.67745	27.3476	0.614432	0.536932	2.09941	0.0512303	-0.0512303	-0.0347398	-0.448695	0.39912	1.37504
	Seriphidium transiliense	0.646747	4.66166	35.5443	0.678828	0.586266	2.24582	0.0974188	-0.0974188	-0.0381885	-0.660087	0.486612	1.5069
	Seriphidium transiliense	0.653796	4.77694	44.5683	0.702471	0.621059	2.05249	0.0551173	-0.0551173	-0.0571476	-0.557657	0.510465	1.66435
	Seriphidium transiliense	0.566323	3.61172	29.4077	0.611218	0.54532	2.06343	0.0303866	-0.0303866	-0.0331878	-0.36095	0.432235	1.5454
	Seriphidium transiliense	0.567302	3.62216	33.917	0.604063	0.53321	2.18956	0.0488767	-0.0488767	-0.0383583	-0.4048	0.426099	1.46133
	Seriphidium transiliense	0.59759	3.97005	33.3181	0.646223	0.57829	2.02851	0.0294912	-0.0294912	-0.0369333	-0.370107	0.44884	1.52107
	Seriphidium transiliense	0.605742	4.07282	32.6617	0.651143	0.572973	2.06894	0.0501877	-0.0501877	-0.0340286	-0.473332	0.443647	1.50161
	Seriphidium transiliense	0.603678	4.0464	27.5213	0.634714	0.563403	2.25614	0.0610336	-0.0610336	-0.0383527	-0.455467	0.461097	1.53567
	Seriphidium transiliense	0.581641	3.78058	18.3157	0.619822	0.55371	2.12094	0.0411989	-0.0411989	-0.0367071	-0.36332	0.437476	1.5294
	Seriphidium transiliense	0.54781	3.42292	23.3762	0.600605	0.540463	1.94099	0.0104371	-0.0104371	-0.0437268	-0.295455	0.373178	1.41561
	Seriphidium transiliense	0.594929	3.9374	36.7702	0.626809	0.549219	2.26444	0.0678941	-0.0678941	-0.0470299	-0.513768	0.465975	1.52
	Seriphidium transiliense	0.506515	3.05281	31.3747	0.56577	0.514631	1.8537	-0.0109778	0.0109778	-0.0348239	-0.193169	0.332456	1.38324
	Seriphidium transiliense	0.430162	2.50977	24.4002	0.4823	0.433064	1.88954	-0.0035668	0.0035668	-0.0233518	-0.184021	0.247476	1.21063
	Seriphidium transiliense	0.497722	2.98186	20.5954	0.554867	0.49904	1.85175	-0.0017531	0.0017531	-0.0243761	-0.23276	0.311607	1.27513
	Seriphidium transiliense	0.495279	2.96259	30.43	0.564549	0.497001	1.72587	-0.00228407	0.00228407	-0.0482963	-0.270648	0.310799	1.36061
	Seriphidium transiliense	0.525637	3.21618	28.478	0.588961	0.512101	1.81405	0.018522	-0.018522	-0.0435253	-0.337479	0.336876	1.37942
	Seriphidium transiliense	0.480143	2.84722	32.1881	0.54037	0.482779	1.82332	-0.00343118	0.00343118	-0.0293413	-0.240692	0.290735	1.24166
	Seriphidium transiliense	0.484062	2.87644	22.2234	0.538783	0.472483	1.88039	0.0150125	-0.0150125	-0.0290157	-0.308692	0.30496	1.35824
	Seriphidium transiliense	0.555916	3.50365	28.6305	0.607246	0.541827	1.97458	0.0201616	-0.0201616	-0.0359663	-0.333007	0.375105	1.3557
	Seriphidium transiliense	0.549649	3.44098	32.076	0.597004	0.532955	2.03095	0.0236101	-0.0236101	-0.0333477	-0.333745	0.374507	1.35177
	Seriphidium transiliense	0.529554	3.25128	29.3289	0.608776	0.545747	1.65625	-0.0227757	0.0227757	-0.0373878	-0.230458	0.350114	1.39905
	Seriphidium transiliense	0.557332	3.51806	32.2892	0.627253	0.559773	1.77226	-0.00354783	0.00354783	-0.040283	-0.302544	0.377049	1.43684
	Seriphidium transiliense	0.611453	4.14738	37.8427	0.649236	0.57635	2.17663	0.0542049	-0.0542049	-0.0450222	-0.437618	0.473477	1.5906
	Seriphidium transiliense	0.641387	4.57705	37.0862	0.633875	0.583275	2.99968	0.0928473	-0.0928473	-0.0360007	-0.540028	0.521808	1.62686
	Seriphidium transiliense	0.553964	3.48394	35.0377	0.604056	0.527022	1.99994	0.0380503	-0.0380503	-0.0373632	-0.403772	0.377529	1.36175
	Seriphidium transiliense	0.529039	3.24664	38.7785	0.582899	0.520061	1.94461	0.0123865	-0.0123865	-0.034993	-0.287887	0.348783	1.38156
	Seriphidium transiliense	0.582848	3.79442	31.0099	0.6409	0.573797	1.9105	0.0136	-0.0136	-0.0524114	-0.345137	0.404993	1.45443
	Seriphidium transiliense	0.559842	3.54382	36.9884	0.604458	0.547497	2.07812	0.0178016	-0.0178016	-0.044202	-0.299244	0.372633	1.40326
	Seriphidium transiliense	0.49991	2.99928	28.093	0.584973	0.50136	1.57166	-0.00193402	0.00193402	-0.0538479	-0.298126	0.357422	1.4204
	Seriphidium transiliense	0.477062	2.82454	29.8041	0.544991	0.467391	1.72327	0.0124461	-0.0124461	-0.0499383	-0.317854	0.300923	1.33522
	Seriphidium transiliense	0.604222	4.05334	36.0215	0.646513	0.57194	2.11359	0.04933	-0.04933	-0.044293	-0.442794	0.441744	1.48749
	Seriphidium transiliense	0.659141	4.86753	43.7962	0.69207	0.62063	2.24218	0.0651708	-0.0651708	-0.0463479	-0.52599	0.523012	1.66466
	Seriphidium transiliense	0.543291	3.37916	26.2787	0.59958	0.531955	1.90304	0.0159437	-0.0159437	-0.042679	-0.33459	0.365203	1.3262
	Seriphidium transiliense	0.534009	3.29192	26.1349	0.584999	0.519204	1.96552	0.0204845	-0.0204845	-0.0360178	-0.31665	0.382037	1.47526
	Seriphidium transiliense	0.443691	2.59512	27.1741	0.490306	0.43842	1.99668	0.00654296	-0.00654296	-0.0269526	-0.217514	0.283595	1.2486
	Seriphidium transiliense	0.619651	4.25833	34.0164	0.653152	0.5866	2.22972	0.0519257	-0.0519257	-0.0354515	-0.429717	0.465403	1.51406
	Seriphidium transiliense	0.592671	3.91003	29.4791	0.642499	0.57377	2.00642	0.0286391	-0.0286391	-0.0335853	-0.37704	0.425566	1.48576
	Seriphidium transiliense	0.549199	3.43654	36.6568	0.59294	0.519779	2.08844	0.0411726	-0.0411726	-0.0325317	-0.396423	0.366739	1.3659
	Seriphidium transiliense	0.64803	4.68231	34.5372	0.687187	0.610739	2.15189	0.0617181	-0.0617181	-0.04667	-0.525549	0.499025	1.5476
	Seriphidium transiliense	0.657567	4.84056	42.1285	0.701918	0.62865	2.09948	0.0492935	-0.0492935	-0.0540588	-0.489069	0.506358	1.60472
	Seriphidium transiliense	0.618526	4.24282	22.6074	0.666572	0.58854	2.01675	0.0471499	-0.0471499	-0.0471477	-0.444913	0.480287	1.58595
	Seriphidium transiliense	0.621676	4.28648	29.2103	0.674548	0.595534	1.9794	0.04151	-0.04151	-0.0412721	-0.446369	0.452873	1.46218
	Seriphidium transiliense	0.622169	4.29337	23.2497	0.659632	0.575057	2.14906	0.0733586	-0.0733586	-0.042075	-0.542248	0.464044	1.57451
	Seriphidium transiliense	0.657683	4.84253	22.5851	0.703201	0.617706	2.051	0.06733	-0.06733	-0.0481317	-0.564811	0.494672	1.63131
	Seriphidium transiliense	0.642494	4.59431	29.8465	0.662383	0.585009	2.41766	0.0921036	-0.0921036	-0.046523	-0.594098	0.531065	1.62318
	Seriphidium transiliense	0.598593	3.98247	39.5027	0.644958	0.563881	2.06471	0.0523973	-0.0523973	-0.0411831	-0.479534	0.427107	1.41491
	Seriphidium transiliense	0.599107	3.98886	32.1295	0.651266	0.579792	1.98528	0.0295939	-0.0295939	-0.0421973	-0.386159	0.434792	1.46905
	Seriphidium transiliense	0.641851	4.58427	27.5235	0.675783	0.616947	2.20568	0.0412307	-0.0412307	-0.0266548	-0.391469	0.472948	1.55304
	Seriphidium transiliense	0.561769	3.56381	27.6331	0.607607	0.546776	2.04611	0.0216404	-0.0216404	-0.0339741	-0.317482	0.398937	1.47568
	Seriphidium transiliense	0.543458	3.38075	25.9562	0.575376	0.514655	2.25607	0.0399859	-0.0399859	-0.0248948	-0.341604	0.388373	1.39664
	Seriphidium transiliense	0.578614	3.74624	28.3853	0.613418	0.550213	2.20697	0.0416656	-0.0416656	-0.0276645	-0.368655	0.428578	1.4409
	Seriphidium transiliense	0.604139	4.05228	31.4239	0.658616	0.580707	1.95962	0.0360957	-0.0360957	-0.0441984	-0.430421	0.434138	1.43508
	Seriphidium transiliense	0.647932	4.68072	36.6056	0.669386	0.584761	2.4033	0.101706	-0.101706	-0.0562363	-0.672147	0.541074	1.63967
	Seriphidium transiliense	0.613096	4.16925	31.5012	0.664665	0.592467	1.99531	0.0323966	-0.0323966	-0.041877	-0.41431	0.442121	1.45524
	Seriphidium transiliense	0.653654	4.77457	28.7434	0.709717	0.633845	1.95531	0.0338217	-0.0338217	-0.0448883	-0.45441	0.489271	1.62635
	Seriphidium transiliense	0.609529	4.12202	27.1976	0.659233	0.582299	2.00769	0.0422117	-0.0422117	-0.039087	-0.44635	0.444466	1.53319
	Seriphidium transiliense	0.661685	4.91165	34.0195	0.693923	0.626903	2.23756	0.0594381	-0.0594381	-0.0367158	-0.489594	0.501807	1.57443
	Seriphidium transiliense	0.647398	4.67212	40.6901	0.681606	0.609875	2.22404	0.062004	-0.062004	-0.0369518	-0.50052	0.485345	1.52703
	Seriphidium transiliense	0.602736	4.03444	33.0395	0.634935	0.569328	2.25112	0.050862	-0.050862	-0.0286315	-0.417598	0.442617	1.45925
	Seriphidium transiliense	0.632044	4.43544	32.1642	0.664824	0.596729	2.23376	0.0567	-0.0567	-0.0264367	-0.458673	0.472263	1.57769
	Seriphidium transiliense	0.576605	3.72372	25.1477	0.616098	0.548513	2.12937	0.0410858	-0.0410858	-0.0355931	-0.383949	0.433115	1.47755
	Seriphidium transiliense	0.575269	3.70886	26.9804	0.599333	0.516204	2.38402	0.0840128	-0.0840128	-0.0399844	-0.530147	0.434136	1.46819
	Seriphidium transiliense	0.580622	3.76897	25.6323	0.619074	0.539425	2.14554	0.0599844	-0.0599844	-0.0337424	-0.478156	0.427567	1.49865
	Seriphidium transiliense	0.631022	4.42038	27.5132	0.664669	0.578717	2.21161	0.0823941	-0.0823941	-0.0477188	-0.574404	0.479671	1.55077
	Seriphidium transiliense	0.618357	4.24049	31.1317	0.645304	0.567735	2.3224	0.078007	-0.078007	-0.0395116	-0.528976	0.465312	1.51991
	Seriphidium transiliense	0.539215	3.34042	26.1117	0.584786	0.522088	2.04144	0.0238377	-0.0238377	-0.0258415	-0.300668	0.372919	1.36618
	Seriphidium transiliense	0.733132	6.49435	34.9607	0.749823	0.673955	2.41504	0.116974	-0.116974	-0.069183	-0.754642	0.641502	1.93908
	Seriphidium transiliense	0.664323	4.95811	25.8628	0.710572	0.625704	2.05325	0.0660911	-0.0660911	-0.0473089	-0.568938	0.506191	1.56564
	Seriphidium transiliense	0.686283	5.37516	27.9812	0.733074	0.651339	2.05505	0.0631892	-0.0631892	-0.0462354	-0.571696	0.527185	1.6106
	Seriphidium transiliense	0.585551	3.82568	28.0781	0.63326	0.555645	2.02788	0.0443282	-0.0443282	-0.0391798	-0.429209	0.43203	1.44063
	Seriphidium transiliense	0.573469	3.68899	27.4753	0.627409	0.550419	1.94715	0.0336809	-0.0336809	-0.0399422	-0.391914	0.414072	1.4263
	Seriphidium transiliense	0.710684	5.91287	26.5656	0.746802	0.680619	2.16625	0.0582325	-0.0582325	-0.0431511	-0.486115	0.56995	1.81471
	Seriphidium transiliense	0.664818	4.9669	29.1169	0.707467	0.638256	2.10069	0.0461401	-0.0461401	-0.0440158	-0.434601	0.524341	1.68724
	Seriphidium transiliense	0.687168	5.3932	35.8365	0.720424	0.646721	2.22208	0.0727999	-0.0727999	-0.0597937	-0.54488	0.54256	1.75177
	Seriphidium transiliense	0.739813	6.68679	38.3367	0.759944	0.68627	2.37164	0.108763	-0.108763	-0.06273	-0.738348	0.640628	1.93304
	Seriphidium transiliense	0.683106	5.31126	37.0014	0.71679	0.641299	2.21933	0.0744	-0.0744	-0.0475232	-0.558121	0.532299	1.67291
	Seriphidium transiliense	0.571878	3.67157	29.9028	0.599799	0.537491	2.3252	0.0496482	-0.0496482	-0.0360269	-0.379096	0.431491	1.50863
	Seriphidium transiliense	0.664104	4.95423	26.7447	0.716649	0.62399	1.98946	0.0685001	-0.0685001	-0.0527706	-0.604264	0.494757	1.64265
	Seriphidium transiliense	0.677193	5.19565	24.3121	0.727785	0.653138	2.006	0.0431323	-0.0431323	-0.0440968	-0.468773	0.516506	1.7361
	Seriphidium transiliense	0.60542	4.06868	28.6616	0.652142	0.59546	2.04534	0.0155743	-0.0155743	-0.0380974	-0.299133	0.45118	1.56743
	Seriphidium transiliense	0.625671	4.34289	31.2443	0.671458	0.618019	2.06475	0.0124756	-0.0124756	-0.0396797	-0.291001	0.470573	1.62806
	Seriphidium transiliense	0.631664	4.42983	31.001	0.678945	0.603532	2.04777	0.0454642	-0.0454642	-0.0404939	-0.458048	0.465366	1.50265
	Seriphidium transiliense	0.638675	4.53518	31.5562	0.684271	0.605858	2.06927	0.0535307	-0.0535307	-0.0429571	-0.495364	0.469945	1.49585
	Seriphidium transiliense	0.662292	4.92227	35.4607	0.68715	0.606995	2.34176	0.0924708	-0.0924708	-0.0469063	-0.643687	0.551857	1.6132
	Seriphidium transiliense	0.700293	5.67318	32.6046	0.724023	0.646496	2.33407	0.0983005	-0.0983005	-0.0454611	-0.690049	0.593615	1.68156
	Seriphidium transiliense	0.610729	4.13782	26.503	0.666774	0.568351	1.93602	0.0649084	-0.0649084	-0.0592548	-0.578961	0.426921	1.5183
	Seriphidium transiliense	0.681029	5.27017	29.1745	0.737527	0.650711	1.96035	0.0544464	-0.0544464	-0.0642212	-0.588024	0.509743	1.67308
	Seriphidium transiliense	0.634715	4.47518	37.983	0.669687	0.587456	2.2125	0.075357	-0.075357	-0.0465187	-0.584535	0.506816	1.53233
	Seriphidium transiliense	0.701693	5.70451	32.7185	0.729497	0.638084	2.28078	0.115179	-0.115179	-0.0575043	-0.813183	0.585775	1.65206
	Seriphidium transiliense	0.572296	3.67613	29.6699	0.622637	0.555277	1.9945	0.0249454	-0.0249454	-0.0410338	-0.341963	0.41359	1.53711
	Seriphidium transiliense	0.695229	5.56231	27.8952	0.719877	0.639337	2.31298	0.100613	-0.100613	-0.0502379	-0.704474	0.580192	1.65931
	Seriphidium transiliense	0.604573	4.05782	47.2003	0.670513	0.56344	1.85549	0.0623819	-0.0623819	-0.0677843	-0.627039	0.436269	1.43979
	Seriphidium transiliense	0.554159	3.48591	39.5433	0.598102	0.515054	2.08978	0.0547255	-0.0547255	-0.0354684	-0.463341	0.404144	1.40293
	Seriphidium transiliense	0.644251	4.62194	27.3051	0.679876	0.617634	2.18254	0.0442067	-0.0442067	-0.0439459	-0.432288	0.478801	1.54042
	Seriphidium transiliense	0.572188	3.67495	41.4067	0.604211	0.539102	2.27503	0.0478438	-0.0478438	-0.0366053	-0.407602	0.413862	1.52609
	Seriphidium transiliense	0.540853	3.35591	50.5473	0.578761	0.507979	2.192	0.0453278	-0.0453278	-0.055235	-0.37858	0.425318	1.50954
	Seriphidium transiliense	0.581525	3.77925	21.8487	0.628137	0.558417	2.02413	0.0342198	-0.0342198	-0.0403144	-0.376709	0.420406	1.53061
	Seriphidium transiliense	0.535478	3.30551	46.8556	0.567304	0.497703	2.29594	0.0515003	-0.0515003	-0.033666	-0.393456	0.401272	1.39319
	Seriphidium transiliense	0.53388	3.29074	54.1269	0.57111	0.49971	2.20634	0.0466028	-0.0466028	-0.0482904	-0.392761	0.402388	1.39494
	Seriphidium transiliense	0.595669	3.94644	51.3844	0.622299	0.551778	2.36643	0.0653795	-0.0653795	-0.0463234	-0.485512	0.477077	1.57375
	Seriphidium transiliense	0.594698	3.93459	45.8143	0.650052	0.558536	1.96152	0.054147	-0.054147	-0.0637139	-0.531836	0.439324	1.45907
	Seriphidium transiliense	0.607699	4.09812	44.6045	0.637897	0.571979	2.29657	0.05475	-0.05475	-0.0458793	-0.438741	0.481956	1.56862
	Seriphidium transiliense	0.636964	4.50909	63.1402	0.684067	0.601891	2.07868	0.0568796	-0.0568796	-0.0556867	-0.532212	0.494835	1.51718
	Seriphidium transiliense	0.637558	4.51813	63.5449	0.686464	0.609673	2.05803	0.0456166	-0.0456166	-0.0521136	-0.492414	0.495157	1.53021
	Seriphidium transiliense	0.639834	4.553	60.5609	0.67892	0.609065	2.17642	0.050416	-0.050416	-0.0525095	-0.455661	0.508879	1.58018
	Seriphidium transiliense	0.690103	5.45376	56.9128	0.722503	0.657843	2.2528	0.0590815	-0.0590815	-0.0593273	-0.490596	0.571089	1.79876
	Seriphidium transiliense	0.546305	3.40825	40.9874	0.583453	0.513619	2.1952	0.0454345	-0.0454345	-0.0395267	-0.391381	0.412503	1.39626
	Seriphidium transiliense	0.550056	3.445	40.6877	0.60731	0.549729	1.91459	0.000468782	-0.000468782	-0.0468007	-0.246838	0.404272	1.42852
	Seriphidium transiliense	0.603006	4.03786	44.7557	0.641658	0.565779	2.17279	0.0565035	-0.0565035	-0.045688	-0.487473	0.464023	1.44792
	Seriphidium transiliense	0.5857	3.82742	38.7284	0.622735	0.555264	2.19062	0.0451048	-0.0451048	-0.0377925	-0.415291	0.449574	1.45
	Seriphidium transiliense	0.542393	3.37056	39.2381	0.583549	0.50393	2.12959	0.0529308	-0.0529308	-0.041338	-0.441153	0.404376	1.45639
	Seriphidium transiliense	0.489414	2.91707	43.9218	0.550082	0.481586	1.8359	0.0102427	-0.0102427	-0.0444217	-0.282173	0.351682	1.382
	Seriphidium transiliense	0.664378	4.95909	44.4342	0.695345	0.623255	2.26776	0.0701852	-0.0701852	-0.0511155	-0.526927	0.548492	1.70806
	Seriphidium transiliense	0.646966	4.66518	53.748	0.675651	0.6011	2.31346	0.0750542	-0.0750542	-0.0528997	-0.542906	0.531075	1.65841
	Seriphidium transiliense	0.580312	3.76545	44.2319	0.643451	0.537346	1.86801	0.0624356	-0.0624356	-0.0639412	-0.620783	0.414734	1.3546
	Seriphidium transiliense	0.497836	2.98276	26.2163	0.571995	0.506514	1.67037	-0.011605	0.011605	-0.0428257	-0.209353	0.384519	1.45876
	Seriphidium transiliense	0.565795	3.60612	36.1209	0.613667	0.533157	2.03405	0.046737	-0.046737	-0.0454947	-0.431436	0.43184	1.51719
	Seriphidium transiliense	0.594152	3.92796	31.7701	0.638175	0.560831	2.08346	0.0499734	-0.0499734	-0.0514063	-0.449931	0.469571	1.50441
	Seriphidium transiliense	0.59115	3.89177	38.9136	0.631475	0.551137	2.14338	0.0593488	-0.0593488	-0.0525054	-0.492571	0.468668	1.51014
	Seriphidium transiliense	0.578129	3.74078	34.8267	0.641015	0.560268	1.86092	0.0264174	-0.0264174	-0.0553424	-0.40484	0.407843	1.37372
	Seriphidium transiliense	0.518867	3.15685	32.814	0.576074	0.506305	1.88919	0.0170371	-0.0170371	-0.043308	-0.315932	0.360945	1.33748
	Seriphidium transiliense	0.498715	2.98975	28.5622	0.56688	0.499162	1.73858	-0.000595376	0.000595376	-0.0377115	-0.248223	0.344627	1.34552
	Seriphidium transiliense	0.620623	4.27181	42.9452	0.677301	0.599719	1.95494	0.0332975	-0.0332975	-0.0567522	-0.447232	0.438612	1.43107
	Seriphidium transiliense	0.471944	2.78748	23.335	0.523483	0.457232	1.92197	0.0187607	-0.0187607	-0.0310283	-0.28413	0.335332	1.3344
	Seriphidium transiliense	0.527251	3.23058	35.1647	0.581981	0.50296	1.92842	0.0330577	-0.0330577	-0.0357424	-0.37361	0.371966	1.39572
	Seriphidium transiliense	0.51897	3.15775	31.5209	0.574764	0.496163	1.90545	0.030717	-0.030717	-0.0328393	-0.369752	0.368756	1.40083
	Seriphidium transiliense	0.624721	4.32936	28.1512	0.686034	0.609627	1.89119	0.0243777	-0.0243777	-0.0535572	-0.400799	0.46861	1.50884
	Seriphidium transiliense	0.536768	3.31749	29.2921	0.609158	0.538393	1.72776	-0.00228612	0.00228612	-0.0378976	-0.269703	0.381045	1.45302
	Seriphidium transiliense	0.529411	3.24999	28.9143	0.593979	0.520207	1.80347	0.0127025	-0.0127025	-0.0394493	-0.322151	0.381433	1.43882
	Seriphidium transiliense	0.573259	3.68668	35.8855	0.636529	0.552999	1.85518	0.0296631	-0.0296631	-0.048039	-0.412176	0.425032	1.49
	Seriphidium transiliense	0.550521	3.44959	37.092	0.611376	0.537211	1.86937	0.0188993	-0.0188993	-0.0457338	-0.324783	0.411954	1.46328
	Seriphidium transiliense	0.530452	3.25941	32.1725	0.596836	0.522032	1.78881	0.0116444	-0.0116444	-0.0394299	-0.325699	0.373734	1.41325
	Seriphidium transiliense	0.571235	3.66457	33.6883	0.637204	0.57226	1.8234	-0.00152264	0.00152264	-0.037876	-0.265689	0.404087	1.45799
	Seriphidium transiliense	0.556117	3.50569	29.9147	0.619872	0.547535	1.83193	0.0123394	-0.0123394	-0.0360078	-0.316894	0.389599	1.41926
	Seriphidium transiliense	0.500915	3.00734	26.4379	0.595839	0.504284	1.48868	-0.00450637	0.00450637	-0.0571273	-0.306	0.360092	1.4095
	Seriphidium transiliense	0.49991	2.99928	28.093	0.584973	0.50136	1.57166	-0.00193402	0.00193402	-0.0538479	-0.298126	0.357422	1.4204
	Seriphidium transiliense	0.587744	3.85135	46.7204	0.619366	0.539204	2.28261	0.0710598	-0.0710598	-0.0570868	-0.503415	0.476565	1.56269
	Seriphidium transiliense	0.662121	4.91927	39.1456	0.708654	0.629358	2.07218	0.0561687	-0.0561687	-0.0486997	-0.515684	0.498276	1.56698
	Seriphidium transiliense	0.589391	3.87081	48.41	0.636152	0.551979	2.06582	0.0554516	-0.0554516	-0.0615966	-0.502828	0.458596	1.47136
	Seriphidium transiliense	0.528368	3.2406	30.5849	0.599704	0.523684	1.73307	0.00647586	-0.00647586	-0.0567944	-0.321148	0.368899	1.29187
	Seriphidium transiliense	0.605387	4.06826	35.6113	0.663886	0.584758	1.92206	0.0319332	-0.0319332	-0.0514874	-0.430082	0.457856	1.44858
	Seriphidium transiliense	0.591978	3.9017	52.0563	0.637865	0.575053	2.08014	0.0256611	-0.0256611	-0.047133	-0.334046	0.458407	1.48462
	Seriphidium transiliense	0.560558	3.55123	52.7983	0.616927	0.54965	1.9389	0.0157651	-0.0157651	-0.0614457	-0.311431	0.431934	1.45995
	Seriphidium transiliense	0.622731	4.30125	57.4698	0.667139	0.591206	2.10658	0.0498936	-0.0498936	-0.0440479	-0.473823	0.476834	1.52046
	Seriphidium transiliense	0.589381	3.87069	55.7042	0.639626	0.562859	2.02636	0.039688	-0.039688	-0.0471928	-0.429721	0.422739	1.40548
	Seriphidium transiliense	0.633242	4.45319	62.9722	0.688015	0.603466	1.9914	0.0481921	-0.0481921	-0.0687733	-0.517738	0.492153	1.51551
	Seriphidium transiliense	0.685263	5.35451	67.0125	0.731928	0.647342	2.09206	0.0681534	-0.0681534	-0.0706291	-0.633674	0.548601	1.6076
	Seriphidium transiliense	0.651589	4.74034	54.5674	0.697087	0.623536	2.09515	0.0472496	-0.0472496	-0.0546828	-0.468677	0.528641	1.59962
	Seriphidium transiliense	0.627889	4.37474	64.7178	0.681669	0.613371	2.00114	0.0236102	-0.0236102	-0.0500404	-0.378319	0.449474	1.4703
	Seriphidium transiliense	0.701362	5.69708	56.0895	0.73985	0.674479	2.17783	0.051017	-0.051017	-0.051166	-0.489613	0.580913	1.69989
	Seriphidium transiliense	0.625664	4.34279	53.8668	0.684182	0.589264	1.94477	0.0576569	-0.0576569	-0.0737253	-0.565465	0.492681	1.54312
	Seriphidium transiliense	0.660702	4.89452	52.0157	0.718327	0.620253	1.96614	0.0685348	-0.0685348	-0.0719187	-0.649521	0.51976	1.57429
	Seriphidium transiliense	0.676903	5.19009	49.691	0.725383	0.64015	2.0625	0.0648564	-0.0648564	-0.0559811	-0.605235	0.535242	1.52567
	Seriphidium transiliense	0.642881	4.60038	44.4133	0.685992	0.596401	2.11516	0.0753835	-0.0753835	-0.0591312	-0.619487	0.503336	1.47342
	Seriphidium transiliense	0.62875	4.38721	55.4383	0.662059	0.592606	2.25332	0.0576105	-0.0576105	-0.0439385	-0.465397	0.502705	1.52178
	Seriphidium transiliense	0.564606	3.59354	54.8166	0.608456	0.540445	2.10509	0.0347713	-0.0347713	-0.0466017	-0.362832	0.439249	1.46939
	Seriphidium transiliense	0.618295	4.23965	33.4418	0.660701	0.59098	2.10915	0.0430427	-0.0430427	-0.0435317	-0.418347	0.495467	1.48513
	Seriphidium transiliense	0.556648	3.51109	35.5452	0.592298	0.520534	2.21106	0.0508471	-0.0508471	-0.0319008	-0.409157	0.437536	1.37316
	Seriphidium transiliense	0.608325	4.10628	69.8099	0.667016	0.585316	1.94186	0.0357323	-0.0357323	-0.0585515	-0.438894	0.462832	1.43097
	Seriphidium transiliense	0.640694	4.56629	73.9441	0.68133	0.603197	2.16218	0.0611159	-0.0611159	-0.0572138	-0.530835	0.4716	1.50146
	Seriphidium transiliense	0.648414	4.6885	68.5568	0.701297	0.625921	2.01845	0.0378571	-0.0378571	-0.0530453	-0.453746	0.504281	1.50057
	Seriphidium transiliense	0.625194	4.33609	64.0199	0.660751	0.573593	2.227	0.0804511	-0.0804511	-0.0548946	-0.579105	0.514632	1.5629
	Seriphidium transiliense	0.598609	3.98268	56.4559	0.642967	0.57033	2.10377	0.0429392	-0.0429392	-0.0387845	-0.431874	0.460767	1.43086
	Seriphidium transiliense	0.628568	4.38457	55.3986	0.671136	0.592065	2.12901	0.0581402	-0.0581402	-0.0604223	-0.490905	0.521301	1.58793
	Seriphidium transiliense	0.651276	4.73519	64.2313	0.693946	0.621976	2.13349	0.0492497	-0.0492497	-0.0520666	-0.477334	0.517623	1.54052
	Seriphidium transiliense	0.631839	4.43241	61.4773	0.68049	0.605051	2.0589	0.0433682	-0.0433682	-0.0480897	-0.456277	0.500741	1.48402
	Seriphidium transiliense	0.672444	5.10583	63.86	0.717043	0.642432	2.11224	0.0528389	-0.0528389	-0.0477494	-0.520746	0.541145	1.57934
	Seriphidium transiliense	0.671631	5.0907	51	0.719271	0.637564	2.07158	0.059578	-0.059578	-0.0605816	-0.53686	0.553693	1.61425
	Seriphidium transiliense	0.643404	4.60859	44.1034	0.696117	0.621586	2.0058	0.036359	-0.036359	-0.0581177	-0.440299	0.524696	1.54623
	Seriphidium transiliense	0.613399	4.17329	44.2244	0.66748	0.583463	1.98161	0.0466207	-0.0466207	-0.0483416	-0.484973	0.479428	1.40331
	Seriphidium transiliense	0.526991	3.22825	38.2461	0.575927	0.494715	2.01016	0.0436586	-0.0436586	-0.0548209	-0.40431	0.388724	1.40823
	Seriphidium transiliense	0.647413	4.67236	47.3317	0.697796	0.613363	2.03458	0.056477	-0.056477	-0.0522603	-0.541796	0.515346	1.4709
	Seriphidium transiliense	0.627198	4.36478	58.351	0.668865	0.589791	2.14207	0.0593688	-0.0593688	-0.0557558	-0.488	0.511071	1.56104
	Seriphidium transiliense	0.624233	4.32244	59.2858	0.668512	0.583375	2.1093	0.0642573	-0.0642573	-0.0559359	-0.543757	0.495119	1.48127
	Seriphidium transiliense	0.69173	5.48781	61.8867	0.749339	0.654321	1.98129	0.0683411	-0.0683411	-0.0716947	-0.668739	0.564642	1.58687
	Seriphidium transiliense	0.703111	5.73653	54.8418	0.751369	0.659961	2.07195	0.0805082	-0.0805082	-0.0733295	-0.699935	0.582718	1.64758
	Seriphidium transiliense	0.621599	4.28539	53.0058	0.68292	0.58868	1.91377	0.0519153	-0.0519153	-0.0577793	-0.558072	0.490553	1.40466
	Seriphidium transiliense	0.606156	4.07816	48.4703	0.662601	0.584415	1.95579	0.0336689	-0.0336689	-0.054205	-0.422068	0.478599	1.42018
	Seriphidium transiliense	0.67639	5.18028	49.3188	0.72717	0.643373	2.03803	0.0584545	-0.0584545	-0.0590365	-0.532138	0.567978	1.66141
	Seriphidium transiliense	0.700876	5.68618	50.4429	0.747418	0.674049	2.08655	0.0508485	-0.0508485	-0.0554168	-0.504572	0.588067	1.69052
	Seriphidium transiliense	0.700808	5.68466	42.4262	0.733634	0.650129	2.23318	0.0930929	-0.0930929	-0.0622021	-0.695403	0.60263	1.6879
	Seriphidium transiliense	0.505603	3.04533	38.3684	0.554938	0.493417	1.9964	0.0162365	-0.0162365	-0.0356431	-0.284237	0.362645	1.42066
	Seriphidium transiliense	0.676105	5.17484	41.2519	0.71023	0.633928	2.2206	0.0738138	-0.0738138	-0.0488377	-0.58199	0.571329	1.5958
	Seriphidium transiliense	0.642825	4.5995	54.0488	0.673926	0.602251	2.28027	0.0662049	-0.0662049	-0.0493081	-0.497905	0.52127	1.65816
	Seriphidium transiliense	0.638628	4.53446	43.9535	0.67745	0.604176	2.16809	0.0560964	-0.0560964	-0.0597647	-0.478956	0.516526	1.65944
	Seriphidium transiliense	0.618247	4.23898	63.3136	0.666912	0.595609	2.05661	0.0358317	-0.0358317	-0.0450688	-0.414193	0.451579	1.5116
	Seriphidium transiliense	0.639849	4.55322	62.2893	0.667402	0.597454	2.33856	0.0686311	-0.0686311	-0.0557242	-0.4863	0.527349	1.70925
	Seriphidium transiliense	0.550553	3.44991	36.7061	0.585745	0.505771	2.22127	0.0620635	-0.0620635	-0.0543156	-0.455603	0.431627	1.48518
	Seriphidium transiliense	0.615102	4.19618	54.8961	0.656438	0.584102	2.14397	0.0483834	-0.0483834	-0.0503085	-0.443703	0.462791	1.51196
	Seriphidium transiliense	0.619387	4.25468	69.1262	0.665436	0.593518	2.09092	0.0409072	-0.0409072	-0.0495952	-0.432166	0.443481	1.4585
	Seriphidium transiliense	0.654547	4.78951	67.9585	0.69885	0.627212	2.11581	0.0463735	-0.0463735	-0.0530566	-0.475051	0.485335	1.53537
	Seriphidium transiliense	0.660311	4.88774	74.6827	0.701821	0.610019	2.15178	0.0842132	-0.0842132	-0.0706841	-0.63992	0.521346	1.66078
	Seriphidium transiliense	0.619705	4.25908	66.4169	0.669775	0.589325	2.04157	0.047858	-0.047858	-0.0542773	-0.480653	0.464627	1.55913
	Seriphidium transiliense	0.570996	3.66196	55.3866	0.640833	0.563827	1.7995	0.0105721	-0.0105721	-0.0596344	-0.333722	0.413507	1.43126
	Seriphidium transiliense	0.594156	3.928	61.3127	0.648069	0.575118	1.98653	0.0289207	-0.0289207	-0.046346	-0.385736	0.446765	1.55891
	Seriphidium transiliense	0.608315	4.10615	54.9365	0.651894	0.582571	2.11419	0.0398764	-0.0398764	-0.0519697	-0.376205	0.483534	1.63257
	Seriphidium transiliense	0.587468	3.84811	46.3881	0.609078	0.538348	2.45711	0.0718405	-0.0718405	-0.0461043	-0.484357	0.471016	1.55493
	Seriphidium transiliense	0.59992	3.999	66.4981	0.64602	0.573075	2.08603	0.0409099	-0.0409099	-0.0534683	-0.419685	0.446753	1.51675
	Seriphidium transiliense	0.643293	4.60684	52.9146	0.69871	0.627369	1.98315	0.0266991	-0.0266991	-0.0493695	-0.398384	0.485835	1.54925
	Seriphidium transiliense	0.624018	4.31941	59.5151	0.670818	0.58884	2.07844	0.0556142	-0.0556142	-0.0486749	-0.500483	0.467717	1.49029
	Seriphidium transiliense	0.653726	4.77577	73.1532	0.720944	0.622428	1.88061	0.0527689	-0.0527689	-0.0732216	-0.596731	0.4958	1.58491
	Seriphidium transiliense	0.67201	5.09775	63.7762	0.719355	0.645837	2.08163	0.0462441	-0.0462441	-0.0621478	-0.487129	0.522261	1.64292
	Seriphidium transiliense	0.671245	5.08356	72.885	0.714464	0.630528	2.1314	0.0705964	-0.0705964	-0.0552457	-0.600712	0.522155	1.58461
	Seriphidium transiliense	0.667241	5.01035	74.6207	0.708854	0.624058	2.15064	0.0739927	-0.0739927	-0.0587671	-0.612612	0.515854	1.56744
	Seriphidium transiliense	0.583356	3.80026	71.3311	0.637495	0.558123	1.98329	0.0374145	-0.0374145	-0.0546491	-0.435128	0.424572	1.45092
	Seriphidium transiliense	0.602007	4.02522	46.1035	0.625733	0.55293	2.40794	0.0735644	-0.0735644	-0.0502719	-0.497031	0.498218	1.6265
	Seriphidium transiliense	0.623583	4.31326	58.4259	0.670375	0.589841	2.07792	0.0533747	-0.0533747	-0.0470589	-0.497739	0.458691	1.47332
	Seriphidium transiliense	0.608966	4.11464	63.7025	0.650195	0.584782	2.14985	0.0375593	-0.0375593	-0.0405394	-0.400392	0.453899	1.49275
	Seriphidium transiliense	0.588151	3.85615	64.3371	0.632253	0.560999	2.10966	0.0405233	-0.0405233	-0.0390469	-0.411264	0.422645	1.43666
	Seriphidium transiliense	0.597808	3.97275	61.4173	0.660863	0.592548	1.88766	0.00814587	-0.00814587	-0.0538812	-0.345119	0.410615	1.44873
	Seriphidium transiliense	0.610009	4.12833	57.4998	0.668696	0.601121	1.93804	0.0140355	-0.0140355	-0.0560079	-0.366468	0.424116	1.41741
	Seriphidium transiliense	0.552707	3.47134	58.2784	0.607791	0.533765	1.95352	0.026869	-0.026869	-0.0453236	-0.365206	0.385435	1.35963
	Seriphidium transiliense	0.579694	3.75844	56.9997	0.633397	0.566513	1.98153	0.0196276	-0.0196276	-0.044861	-0.327899	0.419958	1.45185
	Seriphidium transiliense	0.604533	4.05732	59.2419	0.65888	0.600332	1.98447	0.00659501	-0.00659501	-0.050523	-0.286324	0.457371	1.56009
	Seriphidium transiliense	0.58544	3.8244	41.2674	0.616117	0.549248	2.29278	0.0533456	-0.0533456	-0.0430858	-0.420435	0.451342	1.48115
	Seriphidium transiliense	0.546806	3.41312	60.6827	0.599087	0.515305	1.98772	0.0438592	-0.0438592	-0.0426325	-0.434076	0.382986	1.34102
	Seriphidium transiliense	0.545483	3.40027	58.6926	0.608421	0.526819	1.85632	0.0261899	-0.0261899	-0.0527947	-0.382478	0.38101	1.41528
	Seriphidium transiliense	0.586586	3.83777	59.3475	0.638535	0.573648	2.00638	0.0194995	-0.0194995	-0.037486	-0.325876	0.426564	1.50738
	Seriphidium transiliense	0.537916	3.32822	59.3127	0.601792	0.545611	1.84079	-0.0108921	0.0108921	-0.0370709	-0.202051	0.374904	1.43781
	Seriphidium transiliense	0.644242	4.6218	45.2425	0.676308	0.596188	2.25888	0.0780216	-0.0780216	-0.0658423	-0.574691	0.546294	1.67036
	Seriphidium transiliense	0.665501	4.97909	43.8426	0.70329	0.630892	2.17926	0.0596566	-0.0596566	-0.0657647	-0.518322	0.56014	1.72984
	Seriphidium transiliense	0.544557	3.39133	48.589	0.601722	0.505531	1.9186	0.0538511	-0.0538511	-0.0520753	-0.510383	0.384652	1.3041
	Seriphidium transiliense	0.560447	3.55008	47.662	0.614553	0.534252	1.9633	0.0373914	-0.0373914	-0.0444718	-0.420509	0.41245	1.37761
	Seriphidium transiliense	0.658539	4.85719	47.9333	0.700594	0.62211	2.13151	0.061711	-0.061711	-0.0579763	-0.543655	0.521604	1.56418
	Seriphidium transiliense	0.542768	3.37415	42.3892	0.5811	0.513843	2.17772	0.0401123	-0.0401123	-0.0453271	-0.367307	0.410376	1.44315
	Seriphidium transiliense	0.69098	5.47207	51.5606	0.73989	0.661352	2.0615	0.054562	-0.054562	-0.0608154	-0.582603	0.544747	1.58589
	Seriphidium transiliense	0.656279	4.81868	44.5516	0.69343	0.624459	2.18871	0.0539158	-0.0539158	-0.0594592	-0.462061	0.548178	1.70835
	Seriphidium transiliense	0.626202	4.35049	44.4078	0.68595	0.604367	1.92644	0.0351307	-0.0351307	-0.0580392	-0.44614	0.489453	1.56944
	Seriphidium transiliense	0.685629	5.36192	56.5535	0.727426	0.647041	2.14091	0.0693564	-0.0693564	-0.0537343	-0.604711	0.555457	1.6065
	Seriphidium transiliense	0.633016	4.44982	52.543	0.687676	0.613455	1.98755	0.0319787	-0.0319787	-0.0449212	-0.427576	0.488417	1.49974
	Seriphidium transiliense	0.685512	5.35955	46.181	0.742248	0.654922	1.97903	0.0555135	-0.0555135	-0.0669444	-0.59771	0.539237	1.55658
	Seriphidium transiliense	0.624122	4.32088	44.1287	0.697351	0.61004	1.79786	0.0227405	-0.0227405	-0.0610629	-0.427199	0.474743	1.46358
	Seriphidium transiliense	0.620978	4.27674	47.1365	0.669975	0.577571	2.04418	0.0676806	-0.0676806	-0.0434743	-0.575374	0.469596	1.47956
	Seriphidium transiliense	0.60044	4.00551	47.2033	0.656581	0.564661	1.95597	0.0541326	-0.0541326	-0.0470062	-0.52174	0.447657	1.44887
	Seriphidium transiliense	0.595163	3.94026	55.2071	0.647622	0.554892	2.00114	0.0601283	-0.0601283	-0.0597968	-0.547915	0.445004	1.39201
	Seriphidium transiliense	0.642929	4.60112	72.2035	0.688336	0.615524	2.10306	0.0453531	-0.0453531	-0.0512501	-0.468543	0.464871	1.49046
	Seriphidium transiliense	0.581721	3.78149	46.6618	0.632789	0.549673	2.00817	0.0471116	-0.0471116	-0.0472097	-0.459391	0.434514	1.39837
	Seriphidium transiliense	0.592438	3.90723	45.2939	0.645511	0.560759	1.98664	0.0474387	-0.0474387	-0.0585749	-0.460594	0.470276	1.50732
	Seriphidium transiliense	0.649642	4.70845	51.3065	0.688659	0.591641	2.17125	0.094212	-0.094212	-0.0535322	-0.697386	0.505066	1.49025
	Seriphidium transiliense	0.614923	4.19377	58.2704	0.646106	0.573603	2.29011	0.0638367	-0.0638367	-0.0454379	-0.482073	0.491217	1.56243
	Seriphidium transiliense	0.605602	4.07102	54.1129	0.634815	0.562986	2.32133	0.0646619	-0.0646619	-0.0458362	-0.471691	0.482405	1.5371
	Seriphidium transiliense	0.645371	4.6397	51.5075	0.689441	0.60962	2.10938	0.058939	-0.058939	-0.0566803	-0.505723	0.511508	1.61494
	Seriphidium transiliense	0.654755	4.79298	55.6582	0.697105	0.614384	2.13313	0.0675407	-0.0675407	-0.056247	-0.565991	0.513982	1.5576
	Seriphidium transiliense	0.676472	5.18184	55.2197	0.722876	0.646459	2.08827	0.0533387	-0.0533387	-0.0578861	-0.532204	0.543736	1.61875
	Seriphidium transiliense	0.628231	4.37968	60.4408	0.667477	0.585697	2.17469	0.0672957	-0.0672957	-0.0566646	-0.547322	0.504137	1.54468
	Seriphidium transiliense	0.579674	3.75821	36.7641	0.633172	0.551985	1.96889	0.0407172	-0.0407172	-0.0610952	-0.433373	0.431092	1.41956
	Seriphidium transiliense	0.585522	3.82534	64.5886	0.644171	0.57831	1.92987	0.0109034	-0.0109034	-0.0466569	-0.329627	0.395383	1.37578
	Seriphidium transiliense	0.601407	4.01765	40.3223	0.65288	0.568638	2.00406	0.049799	-0.049799	-0.0557876	-0.48917	0.449152	1.4259
	Seriphidium transiliense	0.600436	4.00545	47.7275	0.641103	0.559177	2.14755	0.0621136	-0.0621136	-0.0650702	-0.500737	0.480715	1.53141
	Seriphidium transiliense	0.543257	3.37883	35.4404	0.595658	0.525167	1.96632	0.0253113	-0.0253113	-0.0405445	-0.340679	0.383298	1.32701
	Seriphidium transiliense	0.569947	3.65059	56.3147	0.608049	0.535224	2.19122	0.0499656	-0.0499656	-0.0508855	-0.41015	0.453222	1.52064
	Seriphidium transiliense	0.591258	3.89306	49.7312	0.651355	0.579434	1.90998	0.0179854	-0.0179854	-0.0597798	-0.346825	0.44607	1.49509
	Seriphidium transiliense	0.538049	3.32946	45.281	0.585257	0.509197	2.04492	0.0397393	-0.0397393	-0.0593041	-0.38066	0.42752	1.46985
	Seriphidium transiliense	0.520978	3.17517	39.4854	0.604777	0.54102	1.61582	-0.0279091	0.0279091	-0.0477986	-0.204687	0.341334	1.28267
	Seriphidium transiliense	0.536502	3.31501	38.1376	0.590311	0.528456	1.94819	0.0112294	-0.0112294	-0.0482465	-0.280934	0.387197	1.3855
	Seriphidium transiliense	0.57666	3.72434	44.9983	0.628736	0.558447	1.99277	0.0268643	-0.0268643	-0.053902	-0.35776	0.433017	1.44729
	Seriphidium transiliense	0.46577	2.7437	33.5658	0.523957	0.463001	1.84113	0.0035295	-0.0035295	-0.0419707	-0.231875	0.319456	1.31815
	Seriphidium transiliense	0.600301	4.00376	55.4557	0.653303	0.575871	1.99664	0.0373377	-0.0373377	-0.0460022	-0.41983	0.437949	1.4863
	Seriphidium transiliense	0.474865	2.80855	37.5664	0.54607	0.488213	1.69199	-0.0173766	0.0173766	-0.0472509	-0.169456	0.308842	1.26479
	Seriphidium transiliense	0.621702	4.28684	61.7616	0.661446	0.581282	2.16892	0.063293	-0.063293	-0.0634252	-0.502078	0.502912	1.60411
	Seriphidium transiliense	0.614887	4.19328	52.5193	0.651806	0.578194	2.20248	0.0569343	-0.0569343	-0.0518135	-0.475312	0.474369	1.50179
	Ceratocarpus arenarius	0.525191	3.21222	44.6077	0.566715	0.479161	2.12786	0.0615085	-0.0615085	-0.058362	-0.476864	0.386311	1.40863
	Ceratocarpus arenarius	0.57358	3.69021	41.5314	0.643304	0.557224	1.79467	0.0240395	-0.0240395	-0.0607186	-0.417307	0.40359	1.47726
	Ceratocarpus arenarius	0.559762	3.54299	37.1154	0.594171	0.502485	2.23309	0.0796922	-0.0796922	-0.0365997	-0.542332	0.411531	1.45469
	Ceratocarpus arenarius	0.529931	3.25469	43.0164	0.598201	0.514405	1.77802	0.0213444	-0.0213444	-0.0590917	-0.39468	0.357833	1.37392
	Ceratocarpus arenarius	0.563933	3.58645	35.2954	0.632192	0.560688	1.797	0.00474441	-0.00474441	-0.043102	-0.315894	0.402355	1.45982
	Ceratocarpus arenarius	0.494428	2.95592	39.6811	0.576101	0.489668	1.60708	0.00628116	-0.00628116	-0.0526318	-0.344358	0.331488	1.37082
	Ceratocarpus arenarius	0.537787	3.32701	32.2725	0.607347	0.532451	1.761	0.00747674	-0.00747674	-0.0430667	-0.343592	0.36988	1.3192
	Ceratocarpus arenarius	0.501428	3.01146	41.144	0.545	0.43828	2.08758	0.0809351	-0.0809351	-0.067911	-0.561436	0.40435	1.39764
	Ceratocarpus arenarius	0.521475	3.17951	39.5701	0.556265	0.474036	2.23739	0.063016	-0.063016	-0.0469197	-0.464489	0.383565	1.38946
	Ceratocarpus arenarius	0.618626	4.2442	36.0137	0.672421	0.594906	1.97846	0.0375335	-0.0375335	-0.0456493	-0.452839	0.468102	1.5759
	Ceratocarpus arenarius	0.577278	3.73124	49.1365	0.644654	0.554859	1.82545	0.0329843	-0.0329843	-0.0347452	-0.419467	0.451487	1.52684
	Ceratocarpus arenarius	0.642917	4.60093	35.7023	0.683779	0.607231	2.13264	0.0585401	-0.0585401	-0.0576483	-0.498001	0.522313	1.68494
	Ceratocarpus arenarius	0.626457	4.35414	34.5199	0.658852	0.582387	2.24478	0.069384	-0.069384	-0.0496716	-0.514812	0.501668	1.63079
	Ceratocarpus arenarius	0.479218	2.84038	28.4883	0.551172	0.476692	1.67854	0.00327434	-0.00327434	-0.0375334	-0.263774	0.327243	1.28867
	Ceratocarpus arenarius	0.53687	3.31844	66.0438	0.596257	0.498501	1.89507	0.0523894	-0.0523894	-0.0480069	-0.479995	0.379368	1.42671
	Ceratocarpus arenarius	0.568379	3.6337	52.78	0.623134	0.540371	1.96196	0.0404235	-0.0404235	-0.0492364	-0.400792	0.435777	1.51703
	Ceratocarpus arenarius	0.562242	3.56874	34.7144	0.607402	0.537848	2.06795	0.0349693	-0.0349693	-0.0362756	-0.369218	0.401125	1.3889
	Ceratocarpus arenarius	0.67598	5.17245	42.248	0.723255	0.643344	2.06917	0.0577509	-0.0577509	-0.0588015	-0.535444	0.511815	1.58737
	Ceratocarpus arenarius	0.631676	4.43001	50.9339	0.660106	0.557275	2.32085	0.114821	-0.114821	-0.0604401	-0.710446	0.492584	1.57639
	Ceratocarpus arenarius	0.662429	4.92467	33.7106	0.692781	0.638424	2.26189	0.0415959	-0.0415959	-0.0518476	-0.397347	0.53794	1.72916
	Ceratocarpus arenarius	0.653758	4.77631	51.1224	0.681989	0.609137	2.31545	0.0741505	-0.0741505	-0.0483037	-0.526226	0.539435	1.73809
	Ceratocarpus arenarius	0.554048	3.48479	40.4311	0.572018	0.4969	2.55559	0.0788583	-0.0788583	-0.052573	-0.535745	0.443838	1.44129
	Ceratocarpus arenarius	0.548163	3.42637	33.7589	0.588351	0.497312	2.13723	0.069909	-0.069909	-0.0555289	-0.507108	0.410431	1.44878
	Ceratocarpus arenarius	0.500604	3.00484	34.3103	0.576615	0.493936	1.6644	0.00885962	-0.00885962	-0.036509	-0.328432	0.329373	1.35491
	Ceratocarpus arenarius	0.597709	3.97153	29.3705	0.621971	0.541048	2.37309	0.0837425	-0.0837425	-0.0429189	-0.545661	0.444102	1.51503
	Ceratocarpus arenarius	0.583045	3.79668	23.3622	0.613279	0.523499	2.26226	0.0857054	-0.0857054	-0.0479945	-0.572251	0.435367	1.46079
	Ceratocarpus arenarius	0.487667	2.90371	35.5615	0.547875	0.461802	1.83327	0.0333825	-0.0333825	-0.0369999	-0.381372	0.318252	1.30526
	Ceratocarpus arenarius	0.556535	3.50994	40.8363	0.616545	0.518224	1.88601	0.0538379	-0.0538379	-0.0583216	-0.518117	0.409901	1.41725
	Ceratocarpus arenarius	0.449369	2.6322	32.3458	0.499411	0.411886	1.95067	0.0459959	-0.0459959	-0.0304188	-0.393799	0.304238	1.2787
	Ceratocarpus arenarius	0.521617	3.18075	26.6756	0.563712	0.481108	2.09157	0.0540807	-0.0540807	-0.0451089	-0.436821	0.366262	1.36821
	Ceratocarpus arenarius	0.52916	3.24773	31.5008	0.569508	0.48117	2.13009	0.064383	-0.064383	-0.0466124	-0.484717	0.37619	1.38787
	Ceratocarpus arenarius	0.496459	2.97187	28.1187	0.538283	0.455553	2.09602	0.0528612	-0.0528612	-0.0459488	-0.398552	0.373343	1.44073
	Ceratocarpus arenarius	0.570432	3.65584	34.9433	0.600556	0.505172	2.2982	0.0916787	-0.0916787	-0.052757	-0.587151	0.438842	1.52016
	Ceratocarpus arenarius	0.570489	3.65646	26.7788	0.601049	0.521688	2.27261	0.0694792	-0.0694792	-0.0503434	-0.467521	0.464245	1.57663
	Ceratocarpus arenarius	0.540964	3.35695	26.3148	0.569596	0.48253	2.31746	0.0790742	-0.0790742	-0.0548663	-0.504799	0.438513	1.50063
	Ceratocarpus arenarius	0.52456	3.20663	32.7628	0.576924	0.491891	1.9551	0.0440292	-0.0440292	-0.0435886	-0.419846	0.365131	1.3361
	Ceratocarpus arenarius	0.488143	2.90734	26.3349	0.556475	0.483991	1.72372	0.00543594	-0.00543594	-0.0452642	-0.270097	0.330991	1.30897
	Ceratocarpus arenarius	0.579592	3.75728	32.5495	0.620068	0.538428	2.13185	0.0598375	-0.0598375	-0.0460501	-0.467517	0.43988	1.52733
	Ceratocarpus arenarius	0.575898	3.71584	34.3923	0.604783	0.517054	2.31615	0.0837955	-0.0837955	-0.0439718	-0.541193	0.440633	1.52208
	Ceratocarpus arenarius	0.545481	3.40025	35.3591	0.598	0.520737	1.96564	0.0345604	-0.0345604	-0.0388313	-0.38946	0.414339	1.49955
	Ceratocarpus arenarius	0.5389	3.33746	42.2883	0.588652	0.511281	2.00709	0.0381227	-0.0381227	-0.0358649	-0.407707	0.397182	1.47223
	Ceratocarpus arenarius	0.645136	4.63597	33.1122	0.67192	0.593665	2.31713	0.0834213	-0.0834213	-0.0581824	-0.609851	0.533269	1.66668
	Ceratocarpus arenarius	0.576866	3.72663	32.1888	0.624459	0.527815	2.03484	0.0705242	-0.0705242	-0.0445286	-0.563345	0.399838	1.41393
	Ceratocarpus arenarius	0.530299	3.25802	28.7685	0.575949	0.492635	2.04415	0.0509822	-0.0509822	-0.0394395	-0.441371	0.369385	1.40286
	Ceratocarpus arenarius	0.549738	3.44185	33.6484	0.604138	0.517748	1.94157	0.0447174	-0.0447174	-0.0411145	-0.441394	0.386114	1.46287
	Ceratocarpus arenarius	0.543312	3.37936	32.1678	0.593077	0.507609	1.99655	0.0492997	-0.0492997	-0.0389798	-0.443491	0.384537	1.46018
	Ceratocarpus arenarius	0.590518	3.88421	35.7124	0.625801	0.556723	2.21184	0.0503463	-0.0503463	-0.0347679	-0.423352	0.429457	1.46795
	Ceratocarpus arenarius	0.570624	3.65792	32.7884	0.606413	0.522781	2.20224	0.068182	-0.068182	-0.0327095	-0.489439	0.414956	1.41636
	Ceratocarpus arenarius	0.46738	2.75502	22.6859	0.514851	0.44524	1.9809	0.0279574	-0.0279574	-0.0438241	-0.295451	0.339142	1.36836
	Ceratocarpus arenarius	0.607942	4.10128	36.0287	0.640081	0.551648	2.25574	0.0846989	-0.0846989	-0.073225	-0.606255	0.518518	1.62073
	Ceratocarpus arenarius	0.441621	2.5818	33.4011	0.500504	0.427336	1.81121	0.0176073	-0.0176073	-0.040886	-0.284747	0.288114	1.32697
	Ceratocarpus arenarius	0.350285	2.07827	16.8921	0.383142	0.319809	2.26424	0.0343209	-0.0343209	-0.0268341	-0.267826	0.228294	1.2089
	Ceratocarpus arenarius	0.37139	2.18162	17.2764	0.415142	0.35028	1.98556	0.024267	-0.024267	-0.0292683	-0.251821	0.242801	1.23128
	Ceratocarpus arenarius	0.42672	2.4887	22.0596	0.478007	0.415698	1.89487	0.0133992	-0.0133992	-0.0253197	-0.247756	0.252593	1.2393
	Ceratocarpus arenarius	0.531829	3.27195	29.5619	0.594457	0.519887	1.82793	0.0165064	-0.0165064	-0.0305431	-0.332223	0.348105	1.39053
	Ceratocarpus arenarius	0.408758	2.38271	23.7497	0.411585	0.346276	3.48559	0.0727834	-0.0727834	-0.0312933	-0.377011	0.323132	1.34758
	Ceratocarpus arenarius	0.311989	1.90693	22.188	0.362594	0.304065	1.80304	0.00875463	-0.00875463	-0.0229951	-0.194447	0.169313	1.16819
	Ceratocarpus arenarius	0.509405	3.07668	37.4976	0.529911	0.486852	2.5426	0.0299909	-0.0299909	-0.0541018	-0.336667	0.388497	1.43968
	Ceratocarpus arenarius	0.609496	4.12159	41.5717	0.643554	0.566561	2.2344	0.0655826	-0.0655826	-0.0523968	-0.514108	0.481377	1.59837
	Ceratocarpus arenarius	0.594244	3.92907	35.521	0.633385	0.547206	2.15538	0.0697037	-0.0697037	-0.0601576	-0.518375	0.46291	1.52476
	Ceratocarpus arenarius	0.587843	3.85252	34.9906	0.615451	0.535448	2.33354	0.0764622	-0.0764622	-0.0576762	-0.512809	0.486662	1.59786
	Ceratocarpus arenarius	0.5073	3.05926	29.2745	0.543933	0.475114	2.18888	0.0424074	-0.0424074	-0.0567799	-0.339152	0.403658	1.46045
	Ceratocarpus arenarius	0.357455	2.11262	19.1837	0.452159	0.391575	1.26834	-0.0396731	0.0396731	-0.0420411	-0.114171	0.200897	1.17149
	Ceratocarpus arenarius	0.587841	3.85249	49.6776	0.621386	0.536848	2.25467	0.074505	-0.074505	-0.0489125	-0.541668	0.475024	1.59138
	Ceratocarpus arenarius	0.319929	1.94087	20.5295	0.393335	0.336442	1.42667	-0.0185047	0.0185047	-0.0434487	-0.150573	0.226834	1.24899
	Ceratocarpus arenarius	0.359578	2.12294	18.861	0.380781	0.322763	2.69381	0.0416492	-0.0416492	-0.0320494	-0.27986	0.258983	1.28648
	Ceratocarpus arenarius	0.437428	2.5551	23.6534	0.479445	0.418713	2.07006	0.0229122	-0.0229122	-0.0368097	-0.264376	0.304177	1.37069
	Ceratocarpus arenarius	0.564234	3.58962	28.378	0.635345	0.569264	1.76036	-0.00741017	0.00741017	-0.0424096	-0.275687	0.371364	1.35741
	Ceratocarpus arenarius	0.457522	2.68679	26.7728	0.499274	0.402327	2.0878	0.0676474	-0.0676474	-0.0259351	-0.461815	0.328129	1.2978
	Ceratocarpus arenarius	0.587368	3.84693	35.269	0.612642	0.545972	2.37451	0.0609372	-0.0609372	-0.0411576	-0.417585	0.479396	1.60288
	Ceratocarpus arenarius	0.567539	3.62469	33.8928	0.619911	0.538984	1.97433	0.0411385	-0.0411385	-0.0528945	-0.433071	0.428626	1.5248
	Ceratocarpus arenarius	0.509228	3.07521	26.1552	0.544531	0.466724	2.20472	0.0557551	-0.0557551	-0.0440597	-0.430176	0.356137	1.33061
	Ceratocarpus arenarius	0.507995	3.065	21.2076	0.572174	0.500884	1.77593	0.00953798	-0.00953798	-0.0458824	-0.296773	0.331275	1.31421
	Ceratocarpus arenarius	0.494521	2.95665	30.9126	0.52835	0.457177	2.24719	0.0482543	-0.0482543	-0.0468838	-0.353478	0.378322	1.44435
	Ceratocarpus arenarius	0.442208	2.58557	27.0509	0.503077	0.465231	1.775	-0.0289857	0.0289857	-0.0350831	-0.153419	0.349585	1.38093
	Ceratocarpus arenarius	0.550814	3.4525	32.3371	0.567944	0.471401	2.56198	0.107265	-0.107265	-0.0535326	-0.634748	0.488091	1.53615
	Ceratocarpus arenarius	0.491854	2.93588	31.086	0.544979	0.461543	1.92573	0.0392135	-0.0392135	-0.043152	-0.389361	0.35283	1.38221
	Ceratocarpus arenarius	0.44411	2.59783	27.5501	0.493575	0.417291	1.94905	0.0329188	-0.0329188	-0.0384203	-0.326423	0.29971	1.30187
	Ceratocarpus arenarius	0.48826	2.90824	22.2616	0.52688	0.445294	2.13417	0.0549034	-0.0549034	-0.0447683	-0.414939	0.354154	1.38594
	Ceratocarpus arenarius	0.55445	3.48884	25.2766	0.606632	0.527604	1.95617	0.0379466	-0.0379466	-0.0440894	-0.387769	0.411741	1.48351
	Ceratocarpus arenarius	0.60803	4.10243	33.0599	0.630853	0.548315	2.3999	0.08958	-0.08958	-0.0484075	-0.56896	0.493997	1.62439
	Ceratocarpus arenarius	0.476467	2.8202	21.3875	0.53959	0.45779	1.76376	0.0238875	-0.0238875	-0.0293731	-0.354686	0.305353	1.27996
	Ceratocarpus arenarius	0.525455	3.21457	24.4232	0.592993	0.519102	1.76018	0.00873617	-0.00873617	-0.0427933	-0.304687	0.374391	1.44818
	Ceratocarpus arenarius	0.573859	3.69328	37.533	0.603707	0.506615	2.30576	0.0948066	-0.0948066	-0.0518483	-0.637597	0.500891	1.55225
	Ceratocarpus arenarius	0.527209	3.2302	25.5625	0.574382	0.506745	2.01422	0.0279244	-0.0279244	-0.029972	-0.334586	0.376764	1.45981
	Ceratocarpus arenarius	0.495274	2.96254	20.8648	0.53345	0.462027	2.13646	0.0431117	-0.0431117	-0.0388842	-0.343375	0.368185	1.42633
	Ceratocarpus arenarius	0.432114	2.52184	19.508	0.466725	0.400852	2.20794	0.0378119	-0.0378119	-0.0286941	-0.295837	0.30196	1.32052
	Ceratocarpus arenarius	0.559457	3.53985	28.7258	0.603071	0.531653	2.0787	0.0395753	-0.0395753	-0.0433764	-0.39544	0.403352	1.41206
	Ceratocarpus arenarius	0.534765	3.2989	34.2869	0.572767	0.496234	2.17288	0.0524487	-0.0524487	-0.0302696	-0.435655	0.362087	1.29865
	Ceratocarpus arenarius	0.491958	2.93668	24.8327	0.532825	0.455515	2.10339	0.0469674	-0.0469674	-0.0404434	-0.390451	0.327147	1.30789
	Ceratocarpus arenarius	0.46012	2.70453	21.119	0.482779	0.421129	2.49227	0.0483622	-0.0483622	-0.0257712	-0.328888	0.322891	1.32202
	Ceratocarpus arenarius	0.551827	3.46256	26.4624	0.614581	0.545153	1.83419	0.00954634	-0.00954634	-0.0430263	-0.33492	0.412078	1.48405
	Ceratocarpus arenarius	0.56277	3.57425	27.9897	0.632295	0.563744	1.77414	-0.00142646	0.00142646	-0.0454336	-0.31952	0.415726	1.47968
	Ceratocarpus arenarius	0.564503	3.59245	26.9823	0.585215	0.508116	2.4563	0.0790645	-0.0790645	-0.0423762	-0.479248	0.448704	1.53412
	Ceratocarpus arenarius	0.529366	3.24958	24.4638	0.545802	0.481901	2.57928	0.0637194	-0.0637194	-0.0405879	-0.379616	0.432165	1.52481
	Ceratocarpus arenarius	0.563525	3.58216	25.839	0.592889	0.527902	2.29272	0.0507078	-0.0507078	-0.0431119	-0.370627	0.448953	1.55573
	Ceratocarpus arenarius	0.59652	3.95688	34.1732	0.605568	0.539742	2.68523	0.0837396	-0.0837396	-0.0395924	-0.476577	0.481384	1.61483
	Ceratocarpus arenarius	0.639875	4.55363	32.8823	0.681603	0.589974	2.11764	0.0801642	-0.0801642	-0.0562486	-0.638436	0.526396	1.65082
	Ceratocarpus arenarius	0.587619	3.84988	24.5372	0.606908	0.531426	2.45455	0.0817079	-0.0817079	-0.04478	-0.498018	0.48207	1.59772
	Ceratocarpus arenarius	0.583959	3.80722	30.3777	0.611712	0.540944	2.3235	0.0628772	-0.0628772	-0.0443915	-0.430525	0.470118	1.58265
	Ceratocarpus arenarius	0.583367	3.80039	28.5487	0.61591	0.544834	2.24136	0.056487	-0.056487	-0.0343197	-0.433368	0.448209	1.48237
	Ceratocarpus arenarius	0.574451	3.69981	31.2069	0.607226	0.537817	2.246	0.0530118	-0.0530118	-0.0354487	-0.420245	0.433351	1.46493
	Ceratocarpus arenarius	0.477836	2.83022	21.1874	0.530523	0.466594	1.90213	0.0144681	-0.0144681	-0.0354594	-0.268397	0.345008	1.43772
	Ceratocarpus arenarius	0.563684	3.58384	27.1422	0.612056	0.533802	2.01195	0.0427432	-0.0427432	-0.0403418	-0.402606	0.429595	1.56303
	Ceratocarpus arenarius	0.489458	2.9174	24.8912	0.542664	0.476114	1.91147	0.0173978	-0.0173978	-0.0353421	-0.301885	0.324461	1.39521
	Ceratocarpus arenarius	0.56107	3.55654	34.5965	0.597188	0.516825	2.20146	0.0623155	-0.0623155	-0.0423777	-0.48573	0.427733	1.43343
	Ceratocarpus arenarius	0.552436	3.46863	23.1712	0.601055	0.534496	1.9954	0.025457	-0.025457	-0.0267013	-0.343015	0.382973	1.46836
	Ceratocarpus arenarius	0.507552	3.06135	26.8815	0.548073	0.478907	2.11609	0.0378436	-0.0378436	-0.0320032	-0.344021	0.348794	1.39832
	Ceratocarpus arenarius	0.533806	3.29006	26.8609	0.582343	0.503087	2.00022	0.0419976	-0.0419976	-0.0550488	-0.371131	0.416778	1.50025
	Ceratocarpus arenarius	0.571311	3.66538	29.4051	0.613947	0.531025	2.09518	0.0578303	-0.0578303	-0.0554597	-0.443619	0.459708	1.56927
	Ceratocarpus arenarius	0.490071	2.92211	29.5878	0.541331	0.474508	1.94911	0.020278	-0.020278	-0.0345494	-0.294086	0.338132	1.31348
	Ceratocarpus arenarius	0.550028	3.44473	35.7649	0.592535	0.523233	2.10546	0.0376237	-0.0376237	-0.0360045	-0.372898	0.397328	1.41269
	Ceratocarpus arenarius	0.60349	4.04401	28.6332	0.646778	0.578049	2.08796	0.0390706	-0.0390706	-0.0424834	-0.401987	0.44919	1.49701
	Ceratocarpus arenarius	0.567541	3.62471	32.5117	0.611853	0.532215	2.07717	0.0506137	-0.0506137	-0.0482626	-0.445358	0.403832	1.43251
	Ceratocarpus arenarius	0.485833	2.88979	24.7537	0.533392	0.456507	1.99265	0.0376834	-0.0376834	-0.0532469	-0.360964	0.385437	1.36398
	Ceratocarpus arenarius	0.551272	3.45704	34.7153	0.572927	0.48373	2.46885	0.0921022	-0.0921022	-0.0531287	-0.579433	0.462255	1.49997
	Ceratocarpus arenarius	0.541477	3.36183	33.0161	0.566366	0.501164	2.40691	0.0553262	-0.0553262	-0.0307317	-0.409579	0.396095	1.4813
	Ceratocarpus arenarius	0.537113	3.32071	34.7287	0.549602	0.483187	2.70011	0.0728259	-0.0728259	-0.0399971	-0.435792	0.457841	1.54603
	Ceratocarpus arenarius	0.586374	3.83529	28.8883	0.616286	0.537942	2.28317	0.070749	-0.070749	-0.0439654	-0.509354	0.468429	1.48728
	Ceratocarpus arenarius	0.435816	2.54495	21.2663	0.503993	0.437794	1.66281	-0.00244407	0.00244407	-0.0378103	-0.235076	0.268363	1.29001
	Ceratocarpus arenarius	0.5525	3.46927	26.8284	0.607273	0.529553	1.92695	0.0324366	-0.0324366	-0.0379999	-0.367935	0.425592	1.40306
	Ceratocarpus arenarius	0.514623	3.12051	42.3857	0.571413	0.494342	1.90189	0.0272005	-0.0272005	-0.0483485	-0.352574	0.397029	1.44427
	Ceratocarpus arenarius	0.597791	3.97254	37.432	0.663913	0.597137	1.84219	0.00101733	-0.00101733	-0.0584927	-0.298152	0.477722	1.49264
	Ceratocarpus arenarius	0.523044	3.19326	24.093	0.55173	0.466923	2.31779	0.0742562	-0.0742562	-0.048099	-0.521143	0.426791	1.47242
	Ceratocarpus arenarius	0.610189	4.13069	55.59	0.634906	0.556616	2.3944	0.0811265	-0.0811265	-0.0562784	-0.563091	0.494969	1.55598
	Ceratocarpus arenarius	0.615133	4.19659	54.6968	0.634787	0.558811	2.47904	0.0858228	-0.0858228	-0.0459372	-0.565349	0.5023	1.56888
	Ceratocarpus arenarius	0.540769	3.35511	21.848	0.57915	0.508468	2.13575	0.044551	-0.044551	-0.0569344	-0.3804	0.419422	1.48249
	Ceratocarpus arenarius	0.658042	4.84867	51.0471	0.685408	0.587083	2.32616	0.115629	-0.115629	-0.0718114	-0.785893	0.571231	1.72515
	Ceratocarpus arenarius	0.629725	4.4014	39.3076	0.668822	0.584056	2.15989	0.0722383	-0.0722383	-0.0772643	-0.554817	0.534275	1.68535
	Ceratocarpus arenarius	0.550455	3.44894	42.6964	0.564994	0.478075	2.64318	0.0982299	-0.0982299	-0.0439544	-0.573362	0.465237	1.55188
	Ceratocarpus arenarius	0.533539	3.2876	52.1775	0.577235	0.50346	2.10078	0.0411263	-0.0411263	-0.0482292	-0.370939	0.408724	1.4397
	Ceratocarpus arenarius	0.564663	3.59415	44.1142	0.58882	0.504935	2.42278	0.0835501	-0.0835501	-0.0568233	-0.552996	0.465924	1.52772
	Ceratocarpus arenarius	0.582069	3.78548	49.5264	0.612245	0.526049	2.31084	0.0807431	-0.0807431	-0.061282	-0.565177	0.47322	1.53457
	Ceratocarpus arenarius	0.506704	3.05436	45.318	0.53444	0.45548	2.38953	0.0665928	-0.0665928	-0.0407469	-0.461496	0.404301	1.49795
	Ceratocarpus arenarius	0.609102	4.11642	46.1056	0.659148	0.572185	2.02813	0.0566665	-0.0566665	-0.0591892	-0.534213	0.489307	1.60024
	Ceratocarpus arenarius	0.59389	3.92478	38.7879	0.621547	0.526328	2.33598	0.0982841	-0.0982841	-0.051046	-0.658881	0.473658	1.46432
	Ceratocarpus arenarius	0.575189	3.70797	39.7716	0.602843	0.514657	2.34638	0.0859854	-0.0859854	-0.0558958	-0.569803	0.467751	1.53133
	Ceratocarpus arenarius	0.637334	4.51471	49.7521	0.683472	0.60567	2.08271	0.0515706	-0.0515706	-0.0769248	-0.512215	0.526648	1.63741
	Ceratocarpus arenarius	0.650339	4.71983	49.7954	0.693752	0.614649	2.11639	0.0594568	-0.0594568	-0.0737077	-0.548418	0.530473	1.63642
	Ceratocarpus arenarius	0.63319	4.45242	53.7874	0.691527	0.600663	1.94968	0.0524912	-0.0524912	-0.0694414	-0.550744	0.499472	1.60464
	Ceratocarpus arenarius	0.63564	4.48908	57.2314	0.683144	0.581141	2.07095	0.086423	-0.086423	-0.0726596	-0.691535	0.501253	1.60594
	Ceratocarpus arenarius	0.521457	3.17935	33.2198	0.60752	0.524814	1.59165	-0.00462247	0.00462247	-0.0753141	-0.307037	0.451629	1.51103
	Ceratocarpus arenarius	0.616697	4.2178	38.7389	0.664497	0.582972	2.04972	0.0526561	-0.0526561	-0.0539868	-0.492004	0.487249	1.52319
	Ceratocarpus arenarius	0.556009	3.5046	27.4196	0.622754	0.5494	1.79643	0.00951591	-0.00951591	-0.0590882	-0.311964	0.41925	1.43083
	Ceratocarpus arenarius	0.608262	4.10545	36.0927	0.658301	0.577365	2.01814	0.0476205	-0.0476205	-0.049627	-0.47225	0.477505	1.55431
	Ceratocarpus arenarius	0.606966	4.08861	39.6071	0.658025	0.579821	2.00983	0.0418856	-0.0418856	-0.0466824	-0.451056	0.471491	1.55248
	Ceratocarpus arenarius	0.534109	3.29285	40.1056	0.590191	0.495863	1.91998	0.052024	-0.052024	-0.0495977	-0.480361	0.40185	1.39487
	Ceratocarpus arenarius	0.579845	3.76015	37.7509	0.598579	0.512956	2.50772	0.0952066	-0.0952066	-0.0531679	-0.565924	0.498963	1.59894
	Ceratocarpus arenarius	0.557126	3.51596	43.8615	0.617313	0.528001	1.88674	0.0412639	-0.0412639	-0.0518941	-0.443543	0.41951	1.45296
	Ceratocarpus arenarius	0.499272	2.99419	35.9067	0.554724	0.491435	1.90419	0.0103851	-0.0103851	-0.0304149	-0.270765	0.264015	1.25338
	Ceratocarpus arenarius	0.535244	3.30333	39.258	0.586778	0.494637	1.97867	0.0552288	-0.0552288	-0.0560931	-0.475486	0.4041	1.41734
	Ceratocarpus arenarius	0.543644	3.38254	25.7243	0.587065	0.51572	2.07217	0.0388025	-0.0388025	-0.0475119	-0.351031	0.423706	1.50214
	Ceratocarpus arenarius	0.526155	3.22079	35.3841	0.585115	0.506154	1.87502	0.0272608	-0.0272608	-0.0448388	-0.3697	0.377045	1.43776
	Ceratocarpus arenarius	0.577864	3.73781	27.4137	0.625118	0.555232	2.03047	0.0333239	-0.0333239	-0.0440424	-0.367833	0.43546	1.47951
	Ceratocarpus arenarius	0.583016	3.79635	38.2636	0.631849	0.546434	2.02874	0.0536847	-0.0536847	-0.0566216	-0.467364	0.45574	1.53832
	Ceratocarpus arenarius	0.610393	4.13338	37.3227	0.653196	0.568354	2.10908	0.0643701	-0.0643701	-0.0556298	-0.497853	0.495317	1.6272
	Ceratocarpus arenarius	0.556323	3.50779	31.4231	0.600996	0.516287	2.06848	0.0561688	-0.0561688	-0.0565592	-0.443367	0.450773	1.54726
	Ceratocarpus arenarius	0.540665	3.35412	31.7462	0.611069	0.543911	1.75401	-0.00459873	0.00459873	-0.0561461	-0.24807	0.401406	1.47755
	Ceratocarpus arenarius	0.476771	2.82242	30.0643	0.531722	0.455329	1.88928	0.0273877	-0.0273877	-0.0432334	-0.319552	0.352298	1.35535
	Ceratocarpus arenarius	0.568083	3.63052	48.4703	0.633274	0.554485	1.84161	0.0198518	-0.0198518	-0.0450417	-0.360587	0.427752	1.54285
	Ceratocarpus arenarius	0.598013	3.97528	47.8269	0.626742	0.549497	2.327	0.072261	-0.072261	-0.052318	-0.523695	0.487167	1.54089
	Ceratocarpus arenarius	0.57685	3.72645	49.056	0.614744	0.533371	2.18892	0.0628007	-0.0628007	-0.0531462	-0.503057	0.457094	1.46913
	Ceratocarpus arenarius	0.630505	4.41279	54.259	0.673	0.587995	2.12935	0.0675551	-0.0675551	-0.0639412	-0.540808	0.545599	1.61429
	Ceratocarpus arenarius	0.608546	4.10915	38.3412	0.659225	0.573339	2.01336	0.0540719	-0.0540719	-0.0721753	-0.477148	0.535397	1.60708
	Ceratocarpus arenarius	0.540103	3.3488	38.1986	0.583728	0.510978	2.09064	0.0402274	-0.0402274	-0.0471641	-0.361347	0.451625	1.46716
	Ceratocarpus arenarius	0.595154	3.94015	33.9012	0.640084	0.550614	2.07527	0.0662495	-0.0662495	-0.0623886	-0.512209	0.508344	1.54129
	Ceratocarpus arenarius	0.563804	3.5851	33.0517	0.618117	0.533423	1.94803	0.0434484	-0.0434484	-0.0599141	-0.419463	0.467572	1.46128
	Ceratocarpus arenarius	0.548048	3.42525	40.1354	0.587571	0.495331	2.15621	0.0723605	-0.0723605	-0.0655495	-0.52047	0.490688	1.4747
	Ceratocarpus arenarius	0.536597	3.3159	40.9634	0.587285	0.503859	1.99227	0.04487	-0.04487	-0.0457698	-0.447613	0.426561	1.31987
	Ceratocarpus arenarius	0.547627	3.42113	42.2886	0.599893	0.505472	1.977	0.0582902	-0.0582902	-0.0726775	-0.479802	0.484154	1.4811
	Ceratocarpus arenarius	0.513068	3.10735	37.8973	0.574029	0.487595	1.84467	0.0339725	-0.0339725	-0.0752506	-0.380573	0.447713	1.43433
	Ceratocarpus arenarius	0.561099	3.55683	47.6513	0.601728	0.510918	2.14687	0.0703476	-0.0703476	-0.0762001	-0.529767	0.487457	1.47664
	Ceratocarpus arenarius	0.656749	4.82664	53.1235	0.67429	0.591027	2.48063	0.107416	-0.107416	-0.0576349	-0.674629	0.557092	1.74022
	Ceratocarpus arenarius	0.480374	2.84892	45.0831	0.537813	0.458837	1.87278	0.0276261	-0.0276261	-0.0492247	-0.341717	0.377724	1.27542
	Ceratocarpus arenarius	0.618496	4.2424	65.1588	0.664219	0.584657	2.09328	0.0530053	-0.0530053	-0.0653119	-0.466037	0.525163	1.60573
	Ceratocarpus arenarius	0.618114	4.23717	56.6035	0.655447	0.571746	2.19908	0.0717118	-0.0717118	-0.0727022	-0.544899	0.527908	1.58816
	Ceratocarpus arenarius	0.555839	3.50287	76.2488	0.619808	0.521219	1.85706	0.0487403	-0.0487403	-0.0722183	-0.519858	0.42018	1.33623
	Ceratocarpus arenarius	0.53645	3.31453	43.9598	0.572517	0.474895	2.21754	0.0825974	-0.0825974	-0.0666183	-0.561804	0.455823	1.43257
	Ceratocarpus arenarius	0.497744	2.98203	35.2521	0.567075	0.470614	1.73281	0.0354287	-0.0354287	-0.0650766	-0.401967	0.401063	1.37901
	Ceratocarpus arenarius	0.455086	2.6703	36.7951	0.522223	0.439713	1.71858	0.0192189	-0.0192189	-0.0579765	-0.323892	0.349328	1.33415
	Ceratocarpus arenarius	0.421816	2.45911	36.5932	0.471892	0.395979	1.93866	0.0310186	-0.0310186	-0.0413405	-0.32064	0.313446	1.21733
	Ceratocarpus arenarius	0.563543	3.58235	51.2094	0.599653	0.509134	2.2196	0.0763006	-0.0763006	-0.0726697	-0.538685	0.485966	1.51963
	Ceratocarpus arenarius	0.618736	4.24571	53.4136	0.653346	0.564854	2.2353	0.082831	-0.082831	-0.0679131	-0.610433	0.505936	1.60458
	Ceratocarpus arenarius	0.501306	3.01048	43.1008	0.546804	0.464456	2.05835	0.0480349	-0.0480349	-0.0624986	-0.408686	0.405015	1.41241
	Ceratocarpus arenarius	0.517095	3.1416	42.0739	0.555371	0.473467	2.17917	0.0577724	-0.0577724	-0.0684922	-0.442613	0.440929	1.44034
	Ceratocarpus arenarius	0.521261	3.17764	43.4364	0.569669	0.487214	2.02078	0.0456379	-0.0456379	-0.0480907	-0.424888	0.392216	1.31799
	Ceratocarpus arenarius	0.553634	3.48063	47.249	0.591544	0.514242	2.1886	0.0550718	-0.0550718	-0.058051	-0.43247	0.453768	1.49863
	Ceratocarpus arenarius	0.541266	3.35982	41.5265	0.576592	0.477641	2.22682	0.0858092	-0.0858092	-0.0688403	-0.586395	0.450043	1.44924
	Ceratocarpus arenarius	0.459698	2.70164	44.6367	0.513174	0.437184	1.9155	0.028177	-0.028177	-0.0483491	-0.348112	0.328153	1.24103
	Ceratocarpus arenarius	0.523774	3.19969	46.204	0.578634	0.493223	1.93506	0.0411926	-0.0411926	-0.0742482	-0.399142	0.431706	1.44921
	Ceratocarpus arenarius	0.555761	3.50209	49.011	0.593285	0.50891	2.19608	0.0653282	-0.0653282	-0.063072	-0.483454	0.459494	1.50617
	Ceratocarpus arenarius	0.537193	3.32145	43.6375	0.577552	0.495101	2.14644	0.0573424	-0.0573424	-0.0670827	-0.4611	0.449389	1.47231
	Ceratocarpus arenarius	0.6237	4.31491	40.6967	0.668007	0.591437	2.09528	0.0511199	-0.0511199	-0.0599878	-0.474222	0.513313	1.65208
	Ceratocarpus arenarius	0.511951	3.09795	44.4708	0.553967	0.480049	2.11817	0.0422963	-0.0422963	-0.04948	-0.39214	0.395704	1.3199
	Ceratocarpus arenarius	0.468434	2.76247	44.7457	0.512641	0.442011	2.07199	0.0333222	-0.0333222	-0.0505672	-0.341769	0.348976	1.29204
	Ceratocarpus arenarius	0.588846	3.86435	51.8301	0.641335	0.558056	1.99672	0.0458598	-0.0458598	-0.0649871	-0.482984	0.455006	1.4464
	Ceratocarpus arenarius	0.442159	2.58525	39.3806	0.497071	0.41396	1.87665	0.0345157	-0.0345157	-0.0691372	-0.357579	0.353365	1.32586
	Ceratocarpus arenarius	0.502065	3.01659	40.4602	0.566083	0.450689	1.80192	0.0664008	-0.0664008	-0.0748919	-0.57336	0.353574	1.28343
	Ceratocarpus arenarius	0.583045	3.79669	54.8533	0.617456	0.53005	2.24596	0.0766992	-0.0766992	-0.067435	-0.550398	0.487503	1.54076
	Ceratocarpus arenarius	0.584061	3.8084	47.8208	0.630556	0.541164	2.06776	0.0627211	-0.0627211	-0.0641445	-0.536699	0.454238	1.46111
	Ceratocarpus arenarius	0.488487	2.90997	44.5439	0.531596	0.448617	2.09589	0.0510586	-0.0510586	-0.069546	-0.422259	0.396805	1.38289
	Ceratocarpus arenarius	0.493564	2.94917	45.8336	0.5366	0.449151	2.09927	0.0570624	-0.0570624	-0.0597814	-0.442659	0.388001	1.38909
	Ceratocarpus arenarius	0.398244	2.32361	35.6302	0.441717	0.377577	2.05225	0.0243243	-0.0243243	-0.0465659	-0.270694	0.302499	1.25794
	Ceratocarpus arenarius	0.617091	4.22317	43.7666	0.656093	0.57073	2.16646	0.0715654	-0.0715654	-0.0602253	-0.551443	0.502935	1.59625
	Ceratocarpus arenarius	0.410486	2.39262	35.3591	0.476031	0.409919	1.68851	0.000681057	-0.000681057	-0.0477408	-0.237826	0.283123	1.19941
	Ceratocarpus arenarius	0.537689	3.32609	48.7415	0.557099	0.465833	2.55249	0.0958691	-0.0958691	-0.0596833	-0.589678	0.45144	1.47391
	Ceratocarpus arenarius	0.523394	3.19634	44.7781	0.563499	0.484926	2.151	0.0515523	-0.0515523	-0.050062	-0.433641	0.398589	1.34531
	Ceratocarpus arenarius	0.424428	2.4748	37.8232	0.460371	0.378117	2.2275	0.0551638	-0.0551638	-0.0570579	-0.388517	0.355205	1.33554
	Ceratocarpus arenarius	0.519595	3.16316	42.2943	0.562926	0.481278	2.09612	0.0510941	-0.0510941	-0.0577357	-0.441834	0.392982	1.32967
	Ceratocarpus arenarius	0.513844	3.1139	43.9987	0.561442	0.476493	2.03065	0.0494608	-0.0494608	-0.0627456	-0.453793	0.403753	1.37242
	Ceratocarpus arenarius	0.538004	3.32904	46.2243	0.574169	0.492667	2.21783	0.0616868	-0.0616868	-0.054923	-0.488236	0.42149	1.36465
	Ceratocarpus arenarius	0.57025	3.65387	44.2834	0.615657	0.52359	2.07674	0.0665219	-0.0665219	-0.0669499	-0.548057	0.44731	1.41296
	Ceratocarpus arenarius	0.570828	3.66013	50.409	0.620012	0.516493	2.03124	0.077052	-0.077052	-0.0592761	-0.621632	0.427752	1.38056
	Ceratocarpus arenarius	0.540911	3.35646	42.6576	0.572566	0.491135	2.29282	0.0677833	-0.0677833	-0.0592993	-0.459019	0.46635	1.50498
	Ceratocarpus arenarius	0.534768	3.29893	40.7889	0.570289	0.478354	2.22366	0.0758055	-0.0758055	-0.0576441	-0.517852	0.453109	1.53888
	Ceratocarpus arenarius	0.490304	2.92391	42.8004	0.522063	0.436238	2.30915	0.0687776	-0.0687776	-0.0680206	-0.480333	0.427159	1.41749
	Ceratocarpus arenarius	0.539616	3.3442	48.9389	0.581397	0.495539	2.12883	0.0601651	-0.0601651	-0.0637399	-0.48882	0.425327	1.39444
	Ceratocarpus arenarius	0.55697	3.51437	50.0833	0.584783	0.503828	2.36423	0.0738729	-0.0738729	-0.059311	-0.48399	0.484301	1.53079
	Ceratocarpus arenarius	0.560262	3.54817	52.6534	0.595539	0.509321	2.23465	0.0712826	-0.0712826	-0.0640496	-0.509712	0.47326	1.51479
	Ceratocarpus arenarius	0.499326	2.99461	48.076	0.539229	0.455363	2.15608	0.0569012	-0.0569012	-0.0580242	-0.438604	0.391465	1.3856
	Ceratocarpus arenarius	0.547088	3.41586	47.8634	0.588222	0.508864	2.13861	0.0529708	-0.0529708	-0.0506421	-0.432667	0.427654	1.3977
	Ceratocarpus arenarius	0.50711	3.0577	53.4395	0.537497	0.453029	2.34078	0.0702117	-0.0702117	-0.0563314	-0.475048	0.421105	1.43194
	Ceratocarpus arenarius	0.422001	2.46021	32.3682	0.472068	0.380961	1.93358	0.0489016	-0.0489016	-0.0707746	-0.40948	0.366823	1.32183
	Ceratocarpus arenarius	0.508476	3.06898	47.8643	0.545134	0.445188	2.21402	0.0818065	-0.0818065	-0.0676366	-0.54752	0.449374	1.44521
	Ceratocarpus arenarius	0.523928	3.20105	48.8018	0.570329	0.494698	2.05539	0.0394572	-0.0394572	-0.0590052	-0.387635	0.418861	1.38911
	Ceratocarpus arenarius	0.628208	4.37935	40.5608	0.664173	0.569674	2.20321	0.091157	-0.091157	-0.0696788	-0.647227	0.53165	1.64576
	Ceratocarpus arenarius	0.502643	3.02126	46.1227	0.547754	0.464534	2.06747	0.0497174	-0.0497174	-0.0512628	-0.434199	0.381488	1.29754
	Ceratocarpus arenarius	0.661715	4.91218	64.283	0.702231	0.623146	2.15979	0.0656323	-0.0656323	-0.0606088	-0.535559	0.543768	1.73847
	Ceratocarpus arenarius	0.667381	5.01289	74.8956	0.707821	0.6341	2.16476	0.057698	-0.057698	-0.0673281	-0.506746	0.538265	1.72536
	Ceratocarpus arenarius	0.647759	4.67793	64.8597	0.67802	0.589249	2.29722	0.0946284	-0.0946284	-0.0615906	-0.661372	0.549897	1.7101
	Ceratocarpus arenarius	0.583453	3.80138	41.9731	0.623408	0.533823	2.15198	0.0720797	-0.0720797	-0.0806188	-0.556276	0.512951	1.60104
	Ceratocarpus arenarius	0.629526	4.39849	67.3929	0.658213	0.573363	2.32814	0.0878844	-0.0878844	-0.0722681	-0.601677	0.5303	1.68259
	Ceratocarpus arenarius	0.581798	3.78237	60.42	0.614219	0.53419	2.28151	0.0690757	-0.0690757	-0.06417	-0.484345	0.489158	1.59633
	Ceratocarpus arenarius	0.603797	4.04792	66.9881	0.645906	0.555187	2.13918	0.0731217	-0.0731217	-0.0607657	-0.566699	0.469784	1.53716
	Ceratocarpus arenarius	0.574523	3.70061	72.5324	0.61355	0.530048	2.18458	0.0639495	-0.0639495	-0.0605461	-0.486074	0.448198	1.52799
	Ceratocarpus arenarius	0.601825	4.02292	60.9215	0.638584	0.555042	2.21126	0.0702495	-0.0702495	-0.0626598	-0.521968	0.481531	1.59553
	Ceratocarpus arenarius	0.623566	4.31302	62.9459	0.657738	0.577569	2.24639	0.0718883	-0.0718883	-0.0634965	-0.534186	0.495275	1.60837
	Ceratocarpus arenarius	0.599287	3.9911	56.3372	0.640276	0.56066	2.14901	0.0581721	-0.0581721	-0.062157	-0.454264	0.500919	1.65513
	Ceratocarpus arenarius	0.64116	4.57351	68.5137	0.675881	0.582582	2.23807	0.0935035	-0.0935035	-0.0701834	-0.664587	0.542582	1.6882
	Ceratocarpus arenarius	0.660181	4.88548	74.2018	0.695881	0.610834	2.22431	0.0826934	-0.0826934	-0.0666764	-0.599006	0.547036	1.74621
	Ceratocarpus arenarius	0.665145	4.97273	50.9695	0.68607	0.590854	2.4185	0.12239	-0.12239	-0.0687286	-0.805797	0.579527	1.73615
	Ceratocarpus arenarius	0.585801	3.8286	67.892	0.625625	0.535659	2.17088	0.0730715	-0.0730715	-0.0720748	-0.545032	0.470627	1.56212
	Ceratocarpus arenarius	0.545812	3.40347	56.7545	0.584364	0.497525	2.18542	0.0662883	-0.0662883	-0.0612129	-0.477542	0.462937	1.56261
	Ceratocarpus arenarius	0.569218	3.64272	60.8259	0.603326	0.526435	2.25727	0.0610893	-0.0610893	-0.0622418	-0.44872	0.469457	1.59354
	Ceratocarpus arenarius	0.591871	3.90041	70.7585	0.639412	0.565254	2.06746	0.0399984	-0.0399984	-0.0703313	-0.390096	0.487434	1.62329
	Ceratocarpus arenarius	0.61236	4.15942	67.3232	0.656211	0.576065	2.11707	0.056076	-0.056076	-0.0629918	-0.487624	0.478008	1.54901
	Ceratocarpus arenarius	0.604935	4.06246	59.3997	0.638877	0.5589	2.25156	0.0695497	-0.0695497	-0.0664818	-0.515026	0.500709	1.63896
	Ceratocarpus arenarius	0.633774	4.46111	75.9924	0.661096	0.588072	2.35108	0.0728555	-0.0728555	-0.0565865	-0.506919	0.523887	1.70403
	Ceratocarpus arenarius	0.579269	3.75363	59.8156	0.625479	0.543725	2.07777	0.0518868	-0.0518868	-0.0622752	-0.449219	0.444268	1.53725
	Ceratocarpus arenarius	0.646426	4.65652	63.8173	0.689387	0.609792	2.12952	0.0604698	-0.0604698	-0.0794863	-0.533206	0.539364	1.71911
	Ceratocarpus arenarius	0.609847	4.1262	53.6075	0.648324	0.561906	2.1819	0.0729333	-0.0729333	-0.0711401	-0.553892	0.510395	1.64761
	Ceratocarpus arenarius	0.611837	4.15247	43.8015	0.632752	0.549949	2.44799	0.0932722	-0.0932722	-0.0415009	-0.616892	0.499225	1.54759
	Ceratocarpus arenarius	0.604685	4.05926	69.0366	0.646325	0.565076	2.14637	0.060169	-0.060169	-0.057509	-0.480997	0.487927	1.60247
	Ceratocarpus arenarius	0.660402	4.88932	53.0962	0.694324	0.611431	2.23683	0.0821368	-0.0821368	-0.0480074	-0.588847	0.542827	1.72379
	Ceratocarpus arenarius	0.656255	4.81827	66.6988	0.690053	0.602992	2.247	0.0881419	-0.0881419	-0.0730303	-0.633196	0.540063	1.71868
	Ceratocarpus arenarius	0.662098	4.91888	53.4177	0.693961	0.6088	2.26408	0.0892893	-0.0892893	-0.0685573	-0.634766	0.562271	1.76145
	Ceratocarpus arenarius	0.59756	3.96969	50.9998	0.627126	0.554251	2.31632	0.0647564	-0.0647564	-0.0459517	-0.465007	0.467669	1.55451
	Ceratocarpus arenarius	0.56175	3.5636	71.4691	0.596322	0.495911	2.25611	0.091263	-0.091263	-0.0408678	-0.578027	0.432418	1.45689
	Ceratocarpus arenarius	0.618236	4.23883	54.9903	0.653676	0.562314	2.2246	0.0857229	-0.0857229	-0.0708388	-0.600074	0.519132	1.63818
	Ceratocarpus arenarius	0.630044	4.40605	49.7739	0.675554	0.591539	2.08923	0.0613817	-0.0613817	-0.066078	-0.499963	0.531638	1.71557
	Ceratocarpus arenarius	0.600885	4.01108	57.3084	0.637071	0.55735	2.2177	0.0654554	-0.0654554	-0.0516171	-0.489913	0.481503	1.60124
	Ceratocarpus arenarius	0.672164	5.10061	85.1714	0.686277	0.587728	2.54274	0.139575	-0.139575	-0.0520848	-0.83262	0.587516	1.8082
	Ceratocarpus arenarius	0.649089	4.69946	50.546	0.686861	0.580852	2.18655	0.109534	-0.109534	-0.0749729	-0.784925	0.535518	1.62461
	Ceratocarpus arenarius	0.690227	5.45634	62.603	0.734716	0.662349	2.11426	0.0513568	-0.0513568	-0.061832	-0.531949	0.541141	1.65138
	Ceratocarpus arenarius	0.663541	4.94426	52.6583	0.703071	0.630313	2.16529	0.057116	-0.057116	-0.0546871	-0.468464	0.549081	1.7781
	Ceratocarpus arenarius	0.703195	5.73842	74.5333	0.730313	0.636503	2.32546	0.120728	-0.120728	-0.073783	-0.817451	0.596709	1.81967
	Ceratocarpus arenarius	0.565646	3.60454	40.9952	0.602391	0.498889	2.1998	0.0930018	-0.0930018	-0.0744914	-0.649169	0.469965	1.50063
	Ceratocarpus arenarius	0.577981	3.73912	39.2923	0.624295	0.537528	2.06116	0.0586845	-0.0586845	-0.0554321	-0.497006	0.457499	1.47462
	Ceratocarpus arenarius	0.574557	3.70098	50.7956	0.613287	0.531927	2.1778	0.0613919	-0.0613919	-0.0587706	-0.480468	0.469274	1.52899
	Ceratocarpus arenarius	0.613067	4.16885	49.6521	0.653305	0.564049	2.15499	0.0749278	-0.0749278	-0.0631483	-0.588644	0.485181	1.52183
	Ceratocarpus arenarius	0.560713	3.55283	42.8236	0.607452	0.517867	2.05522	0.0603787	-0.0603787	-0.0517355	-0.484976	0.44754	1.48191
	Ceratocarpus arenarius	0.566247	3.61092	45.7027	0.616673	0.522126	2.01045	0.0626411	-0.0626411	-0.0594073	-0.535672	0.431551	1.40748
	Ceratocarpus arenarius	0.538865	3.33713	46.3471	0.595916	0.50561	1.91545	0.0457093	-0.0457093	-0.063662	-0.429312	0.434991	1.47448
	Ceratocarpus arenarius	0.630866	4.41808	51.8578	0.65743	0.566981	2.35064	0.0994606	-0.0994606	-0.0696963	-0.685824	0.532662	1.65439
	Ceratocarpus arenarius	0.597387	3.96755	45.7658	0.643447	0.543955	2.0743	0.079153	-0.079153	-0.0678145	-0.597555	0.488028	1.54803
	Ceratocarpus arenarius	0.588536	3.86069	43.5654	0.648746	0.556746	1.90324	0.0472829	-0.0472829	-0.0605909	-0.485064	0.449246	1.43737
	Ceratocarpus arenarius	0.652425	4.75416	55.3578	0.693615	0.602297	2.14692	0.0825774	-0.0825774	-0.0667522	-0.63737	0.54683	1.66704
	Ceratocarpus arenarius	0.578295	3.74265	40.0816	0.622612	0.515553	2.0888	0.0893942	-0.0893942	-0.0642606	-0.635895	0.472223	1.52007
	Ceratocarpus arenarius	0.602616	4.03291	45.395	0.648529	0.557354	2.07676	0.0681523	-0.0681523	-0.0536864	-0.553379	0.471423	1.46158
	Ceratocarpus arenarius	0.62872	4.38677	54.6781	0.659171	0.567363	2.29445	0.0953815	-0.0953815	-0.0572747	-0.646535	0.5266	1.61767
	Ceratocarpus arenarius	0.617347	4.22667	53.7061	0.666012	0.568936	2.05165	0.0746196	-0.0746196	-0.062443	-0.595508	0.499205	1.56266
	Ceratocarpus arenarius	0.520194	3.16835	32.3384	0.57052	0.476254	1.98046	0.0584115	-0.0584115	-0.0494661	-0.469436	0.409189	1.42547
	Ceratocarpus arenarius	0.585957	3.83042	42.6076	0.639981	0.553708	1.9709	0.0477376	-0.0477376	-0.0526605	-0.478064	0.43535	1.46386
	Ceratocarpus arenarius	0.60278	4.035	51.5826	0.633557	0.52836	2.29556	0.109199	-0.109199	-0.0765711	-0.724834	0.517272	1.58746
	Ceratocarpus arenarius	0.604098	4.05175	48.6362	0.652347	0.57724	2.05044	0.0412375	-0.0412375	-0.0656065	-0.451597	0.510831	1.61038
	Ceratocarpus arenarius	0.635179	4.48215	52.4369	0.690175	0.604913	1.98463	0.0491512	-0.0491512	-0.0637038	-0.505809	0.510094	1.59169
	Ceratocarpus arenarius	0.669403	5.04967	55.549	0.71117	0.609569	2.1404	0.10108	-0.10108	-0.0720801	-0.747476	0.583867	1.7185
	Ceratocarpus arenarius	0.552798	3.47225	40.7253	0.611964	0.528834	1.89353	0.0338634	-0.0338634	-0.0453748	-0.400666	0.398799	1.40304
	Ceratocarpus arenarius	0.553109	3.47536	42.2606	0.601431	0.50546	2.03116	0.0661404	-0.0661404	-0.0693164	-0.512238	0.455287	1.49227
	Ceratocarpus arenarius	0.580752	3.77045	48.8266	0.62121	0.531589	2.15093	0.07112	-0.07112	-0.0739048	-0.550908	0.489365	1.54136
	Ceratocarpus arenarius	0.512069	3.09894	35.1279	0.552238	0.452742	2.13808	0.0772315	-0.0772315	-0.0639287	-0.535758	0.425147	1.42564
	Ceratocarpus arenarius	0.486491	2.89477	40.5806	0.54414	0.463005	1.8708	0.0303138	-0.0303138	-0.0596252	-0.33473	0.380043	1.39015
	Ceratocarpus arenarius	0.595725	3.94713	46.4832	0.627956	0.530061	2.27044	0.0959685	-0.0959685	-0.0742701	-0.656352	0.505315	1.56964
	Ceratocarpus arenarius	0.624843	4.3311	53.4729	0.662938	0.578779	2.18614	0.072161	-0.072161	-0.0684064	-0.586844	0.514528	1.59094
	Ceratocarpus arenarius	0.554253	3.48685	43.1932	0.6022	0.508656	2.03742	0.0634985	-0.0634985	-0.0697404	-0.500784	0.461773	1.49746
	Ceratocarpus arenarius	0.580427	3.76675	41.9818	0.611369	0.52625	2.29099	0.0780031	-0.0780031	-0.0569629	-0.554886	0.472558	1.53814
	Ceratocarpus arenarius	0.540935	3.35669	45.0614	0.580405	0.501521	2.16207	0.0540883	-0.0540883	-0.0675177	-0.422667	0.4577	1.50432
	Ceratocarpus arenarius	0.640847	4.56866	48.1331	0.687589	0.606364	2.07501	0.0563986	-0.0563986	-0.0640921	-0.505886	0.524183	1.6409
	Ceratocarpus arenarius	0.523036	3.19319	40.9714	0.566653	0.486489	2.09092	0.0490203	-0.0490203	-0.0499817	-0.411205	0.412327	1.40148
	Ceratocarpus arenarius	0.498218	2.9858	47.391	0.538652	0.457417	2.1461	0.052844	-0.052844	-0.0656183	-0.417104	0.408235	1.42589
	Petrosimonia sibirica	0.57878	3.74811	44.0729	0.631453	0.546618	1.98552	0.0470451	-0.0470451	-0.0445219	-0.488044	0.44844	1.46316
	Petrosimonia sibirica	0.545645	3.40185	36.5804	0.576092	0.485607	2.3048	0.0816816	-0.0816816	-0.0826254	-0.5816	0.488891	1.48496
	Petrosimonia sibirica	0.70577	5.7974	52.0791	0.738919	0.665315	2.23702	0.0762656	-0.0762656	-0.0573675	-0.622227	0.584418	1.72777
	Petrosimonia sibirica	0.647102	4.66735	55.007	0.690923	0.615265	2.11468	0.0528971	-0.0528971	-0.0577449	-0.515179	0.505372	1.52595
	Petrosimonia sibirica	0.711744	5.93828	52.3771	0.728286	0.667815	2.45412	0.0837246	-0.0837246	-0.0533784	-0.582612	0.600196	1.80125
	Petrosimonia sibirica	0.703423	5.7436	50.8135	0.734673	0.660298	2.25967	0.0805272	-0.0805272	-0.0566477	-0.639902	0.58165	1.71908
	Petrosimonia sibirica	0.719715	6.13558	61.1829	0.737796	0.668492	2.4333	0.0987183	-0.0987183	-0.0647898	-0.693843	0.605649	1.77487
	Petrosimonia sibirica	0.664193	4.9558	48.8161	0.705407	0.635286	2.1423	0.0500084	-0.0500084	-0.0488821	-0.492083	0.534034	1.58756
	Petrosimonia sibirica	0.706356	5.81097	57.6708	0.729168	0.662383	2.37307	0.0826374	-0.0826374	-0.062817	-0.616223	0.591382	1.75141
	Petrosimonia sibirica	0.662031	4.91771	52.8878	0.699536	0.626738	2.19052	0.0603219	-0.0603219	-0.0731331	-0.530124	0.553	1.67628
	Petrosimonia sibirica	0.686447	5.3785	59.3232	0.722372	0.651477	2.21131	0.0632594	-0.0632594	-0.0653823	-0.570863	0.557992	1.64133
	Petrosimonia sibirica	0.667963	5.02343	55.9841	0.704116	0.633018	2.20888	0.060545	-0.060545	-0.0640586	-0.53406	0.542112	1.61547
	Petrosimonia sibirica	0.6186	4.24383	41.4566	0.662015	0.572777	2.1067	0.0709681	-0.0709681	-0.0738361	-0.612572	0.524757	1.51002
	Petrosimonia sibirica	0.657391	4.83756	48.4904	0.697103	0.63092	2.16021	0.0452308	-0.0452308	-0.0619918	-0.468759	0.529887	1.62054
	Petrosimonia sibirica	0.617852	4.23357	53.3156	0.658522	0.589369	2.15184	0.0447941	-0.0447941	-0.0708681	-0.44556	0.526797	1.64771
	Petrosimonia sibirica	0.667028	5.00651	47.0458	0.684216	0.606005	2.47229	0.102425	-0.102425	-0.0700111	-0.664664	0.571554	1.73275
	Petrosimonia sibirica	0.677165	5.19511	57.8398	0.706453	0.635926	2.29738	0.072429	-0.072429	-0.0691325	-0.587012	0.555772	1.65388
	Petrosimonia sibirica	0.702879	5.73127	59.9082	0.720016	0.647383	2.45743	0.101833	-0.101833	-0.0616975	-0.686399	0.606373	1.79441
	Petrosimonia sibirica	0.650298	4.71915	40.9981	0.693645	0.620678	2.10947	0.0496667	-0.0496667	-0.0669806	-0.472361	0.541687	1.67662
	Petrosimonia sibirica	0.691715	5.48751	53.0767	0.724474	0.652718	2.2454	0.071098	-0.071098	-0.0568748	-0.587741	0.566455	1.66582
	Petrosimonia sibirica	0.631074	4.42113	56.9042	0.689555	0.616247	1.94888	0.0242626	-0.0242626	-0.0606413	-0.413323	0.486895	1.50529
	Petrosimonia sibirica	0.661665	4.91131	41.8515	0.699272	0.626956	2.17976	0.0593162	-0.0593162	-0.0584098	-0.517033	0.53541	1.61327
	Petrosimonia sibirica	0.63436	4.46986	55.7139	0.681964	0.613662	2.06873	0.0338909	-0.0338909	-0.0612989	-0.420028	0.501965	1.54377
	Petrosimonia sibirica	0.587541	3.84897	44.6837	0.599422	0.506612	2.65478	0.115227	-0.115227	-0.0762053	-0.719754	0.55441	1.59022
	Petrosimonia sibirica	0.672136	5.10009	56.2921	0.709576	0.640942	2.19262	0.0548032	-0.0548032	-0.063397	-0.505965	0.546716	1.64071
	Petrosimonia sibirica	0.605817	4.07378	47.7362	0.646636	0.571841	2.1456	0.0519849	-0.0519849	-0.0611782	-0.479314	0.483396	1.47615
	Petrosimonia sibirica	0.600342	4.00428	44.2595	0.645728	0.578353	2.08213	0.0336849	-0.0336849	-0.0542079	-0.397083	0.474634	1.47277
	Petrosimonia sibirica	0.564641	3.59391	47.6056	0.612617	0.536264	2.04346	0.0407015	-0.0407015	-0.0673841	-0.414449	0.457013	1.5127
	Petrosimonia sibirica	0.606767	4.08605	47.5967	0.643544	0.572601	2.20153	0.0523567	-0.0523567	-0.0598087	-0.482245	0.486638	1.48247
	Petrosimonia sibirica	0.582442	3.78976	44.4279	0.63607	0.564476	1.97572	0.026767	-0.026767	-0.0673581	-0.385486	0.45975	1.4369
	Petrosimonia sibirica	0.60613	4.07782	46.7543	0.648803	0.573213	2.12012	0.050443	-0.050443	-0.068249	-0.491844	0.479609	1.55447
	Petrosimonia sibirica	0.581678	3.78101	40.5288	0.641817	0.573486	1.898	0.012293	-0.012293	-0.0633792	-0.322109	0.453027	1.46001
	Petrosimonia sibirica	0.590476	3.88372	41.2315	0.642474	0.575916	1.99525	0.0220629	-0.0220629	-0.0568494	-0.359155	0.461653	1.44864
	Petrosimonia sibirica	0.597608	3.97028	44.2627	0.647402	0.575207	2.0266	0.034136	-0.034136	-0.0624713	-0.414942	0.466471	1.45309
	Petrosimonia sibirica	0.489678	2.91909	32.0797	0.529889	0.459075	2.13092	0.0394778	-0.0394778	-0.0540479	-0.369734	0.390749	1.31558
	Petrosimonia sibirica	0.585962	3.83047	44.3461	0.632863	0.56428	2.06008	0.0323923	-0.0323923	-0.0534983	-0.384468	0.453859	1.43029
	Petrosimonia sibirica	0.661451	4.90757	50.9431	0.67782	0.599101	2.49429	0.103277	-0.103277	-0.0728294	-0.673004	0.566792	1.71224
	Petrosimonia sibirica	0.661978	4.91677	47.0866	0.687349	0.615525	2.34977	0.0783973	-0.0783973	-0.0630037	-0.565627	0.553144	1.68157
	Petrosimonia sibirica	0.652819	4.76069	46.0528	0.69316	0.618753	2.15057	0.0571516	-0.0571516	-0.0660067	-0.505753	0.535928	1.64672
	Petrosimonia sibirica	0.623161	4.30731	47.4761	0.659848	0.586298	2.20091	0.0580842	-0.0580842	-0.0647157	-0.491378	0.507162	1.56237
	Petrosimonia sibirica	0.660064	4.88347	53.3706	0.690913	0.610777	2.27836	0.0825788	-0.0825788	-0.0780651	-0.623786	0.561614	1.69705
	Petrosimonia sibirica	0.630366	4.41076	58.1153	0.665502	0.589305	2.22894	0.0653306	-0.0653306	-0.060431	-0.523875	0.521022	1.56378
	Petrosimonia sibirica	0.661649	4.91102	54.2186	0.702544	0.633616	2.14985	0.0482691	-0.0482691	-0.0736285	-0.484694	0.543147	1.62933
	Petrosimonia sibirica	0.668843	5.03943	46.8942	0.702626	0.630784	2.23207	0.0658331	-0.0658331	-0.0691035	-0.539467	0.55777	1.69434
	Petrosimonia sibirica	0.6597	4.87717	46.0758	0.701687	0.631749	2.13082	0.0479254	-0.0479254	-0.067612	-0.46509	0.539312	1.65594
	Petrosimonia sibirica	0.659513	4.87395	30.5869	0.691952	0.599614	2.22885	0.0990813	-0.0990813	-0.0839282	-0.709668	0.568918	1.6517
	Petrosimonia sibirica	0.574734	3.70294	43.5661	0.627124	0.55276	1.98707	0.0322053	-0.0322053	-0.058611	-0.38876	0.448894	1.4372
	Petrosimonia sibirica	0.645272	4.63813	54.8436	0.692605	0.619405	2.07327	0.0430899	-0.0430899	-0.0654977	-0.474906	0.520769	1.54649
	Petrosimonia sibirica	0.63937	4.54585	40.9812	0.698198	0.632193	1.93836	0.0120463	-0.0120463	-0.0669018	-0.333681	0.507635	1.60819
	Petrosimonia sibirica	0.639562	4.54881	49.3778	0.670683	0.588981	2.27728	0.0811499	-0.0811499	-0.0683793	-0.627359	0.523145	1.51952
	Petrosimonia sibirica	0.640606	4.56493	50.8677	0.687156	0.61685	2.07913	0.0392761	-0.0392761	-0.0611505	-0.453888	0.512379	1.53389
	Petrosimonia sibirica	0.669447	5.05047	56.5408	0.705114	0.632807	2.21515	0.0635701	-0.0635701	-0.0631944	-0.554254	0.550376	1.60646
	Petrosimonia sibirica	0.645049	4.63458	35.3091	0.694851	0.625631	2.02855	0.0325559	-0.0325559	-0.0566475	-0.403672	0.524106	1.58152
	Petrosimonia sibirica	0.656791	4.82736	44.855	0.695891	0.628311	2.16464	0.0484901	-0.0484901	-0.0690806	-0.434088	0.563568	1.75403
	Petrosimonia sibirica	0.64416	4.62051	33.0252	0.676438	0.600144	2.23944	0.0717571	-0.0717571	-0.059704	-0.546215	0.525357	1.56291
	Petrosimonia sibirica	0.625336	4.33811	38.7109	0.648048	0.577791	2.40077	0.0744406	-0.0744406	-0.0488536	-0.524058	0.516034	1.54193
	Petrosimonia sibirica	0.566595	3.61462	44.0992	0.584014	0.487928	2.55884	0.108725	-0.108725	-0.0728036	-0.687987	0.539417	1.5398
	Petrosimonia sibirica	0.655148	4.79958	51.3458	0.681335	0.610093	2.34481	0.0750531	-0.0750531	-0.0674524	-0.54152	0.572763	1.76614
	Petrosimonia sibirica	0.619925	4.26211	46.2304	0.657546	0.577556	2.18732	0.0659994	-0.0659994	-0.0624001	-0.546392	0.486928	1.52447
	Petrosimonia sibirica	0.611049	4.14204	45.1528	0.653332	0.580508	2.1242	0.0473302	-0.0473302	-0.0552211	-0.460556	0.478986	1.53885
	Petrosimonia sibirica	0.651269	4.73508	44.6626	0.692368	0.622611	2.14007	0.0482043	-0.0482043	-0.0520569	-0.478666	0.515325	1.65187
	Petrosimonia sibirica	0.62097	4.27662	47.4525	0.67398	0.603675	1.99849	0.0276651	-0.0276651	-0.0608267	-0.432968	0.481575	1.53966
	Petrosimonia sibirica	0.602856	4.03595	40.3763	0.662476	0.59447	1.91391	0.0130695	-0.0130695	-0.0621044	-0.375316	0.460546	1.51689
	Petrosimonia sibirica	0.647367	4.67162	54.7533	0.684938	0.604245	2.19218	0.0708273	-0.0708273	-0.0650425	-0.590989	0.53341	1.60405
	Petrosimonia sibirica	0.627505	4.3692	47.3332	0.668553	0.583804	2.14269	0.0689661	-0.0689661	-0.0687364	-0.574013	0.503014	1.55315
	Petrosimonia sibirica	0.509551	3.07789	40.3779	0.55686	0.486949	2.03019	0.0300601	-0.0300601	-0.0516222	-0.334055	0.384737	1.37342
	Petrosimonia sibirica	0.659516	4.874	52.2559	0.695785	0.616987	2.20597	0.071709	-0.071709	-0.0690314	-0.597755	0.542489	1.628
	Petrosimonia sibirica	0.629412	4.39683	27.5188	0.638129	0.532133	2.62454	0.146269	-0.146269	-0.0731113	-0.88581	0.56752	1.60324
	Petrosimonia sibirica	0.567733	3.62677	41.5643	0.641604	0.573413	1.75049	-0.00842179	0.00842179	-0.0619532	-0.304002	0.428399	1.44175
	Petrosimonia sibirica	0.555582	3.50026	38.3426	0.616645	0.54371	1.87127	0.0170098	-0.0170098	-0.0607473	-0.328854	0.414843	1.4111
	Petrosimonia sibirica	0.617755	4.23225	44.3535	0.666614	0.585808	2.04286	0.0500658	-0.0500658	-0.0708433	-0.503715	0.483707	1.52054
	Petrosimonia sibirica	0.664125	4.9546	51.573	0.702921	0.623717	2.17348	0.0689834	-0.0689834	-0.0675367	-0.588934	0.541858	1.62699
	Petrosimonia sibirica	0.562862	3.57522	43.6501	0.626084	0.552744	1.85624	0.014688	-0.014688	-0.0630196	-0.360615	0.428031	1.43756
	Petrosimonia sibirica	0.621584	4.28518	43.7308	0.665121	0.59269	2.10766	0.0457468	-0.0457468	-0.0680519	-0.460212	0.499111	1.56636
	Petrosimonia sibirica	0.657729	4.84332	56.8672	0.703097	0.635678	2.09865	0.0378948	-0.0378948	-0.0518501	-0.477556	0.52668	1.68921
	Petrosimonia sibirica	0.584274	3.81086	49.6545	0.629155	0.564934	2.0905	0.0288691	-0.0288691	-0.0530157	-0.367476	0.471856	1.61409
	Petrosimonia sibirica	0.628826	4.38831	48.6413	0.675815	0.601177	2.07054	0.0444555	-0.0444555	-0.0539528	-0.481695	0.491254	1.5084
	Petrosimonia sibirica	0.542815	3.37459	44.2425	0.609838	0.544698	1.80208	-0.00267405	0.00267405	-0.0558788	-0.280109	0.437632	1.51432
	Petrosimonia sibirica	0.656766	4.82694	43.5388	0.686507	0.585498	2.28584	0.115796	-0.115796	-0.0866926	-0.822365	0.582329	1.61492
	Petrosimonia sibirica	0.591973	3.90164	47.9972	0.655088	0.588357	1.87736	0.00554879	-0.00554879	-0.0602044	-0.350055	0.459227	1.49052
	Petrosimonia sibirica	0.57997	3.76157	44.9123	0.636975	0.561705	1.93568	0.0270904	-0.0270904	-0.0670719	-0.408675	0.447175	1.46307
	Petrosimonia sibirica	0.63054	4.41331	54.5036	0.678713	0.606721	2.06068	0.0385769	-0.0385769	-0.0625853	-0.474858	0.50637	1.55807
	Petrosimonia sibirica	0.614791	4.19198	48.7942	0.665995	0.59651	2.01809	0.0288664	-0.0288664	-0.0597125	-0.434156	0.480104	1.51074
	Petrosimonia sibirica	0.615631	4.20334	48.4046	0.657511	0.581396	2.1324	0.0533204	-0.0533204	-0.0640033	-0.501332	0.485091	1.50545
	Petrosimonia sibirica	0.638056	4.52572	51.3008	0.672813	0.595992	2.22836	0.0678764	-0.0678764	-0.0704648	-0.553764	0.522031	1.59921
	Petrosimonia sibirica	0.562322	3.56957	44.9474	0.609937	0.527675	2.04562	0.0492652	-0.0492652	-0.0684591	-0.472595	0.451838	1.43997
	Petrosimonia sibirica	0.605491	4.0696	44.6518	0.655269	0.577281	2.02921	0.0433702	-0.0433702	-0.0686753	-0.469007	0.476281	1.51315
	Petrosimonia sibirica	0.631949	4.43403	42.0715	0.68936	0.610962	1.95085	0.0341867	-0.0341867	-0.0692808	-0.467354	0.499684	1.56974
	Petrosimonia sibirica	0.609834	4.12602	35.6831	0.670848	0.596059	1.898	0.0216415	-0.0216415	-0.0725059	-0.410716	0.481782	1.55926
	Petrosimonia sibirica	0.502837	3.02283	25.5502	0.522403	0.441453	2.54154	0.0788978	-0.0788978	-0.0659546	-0.482767	0.471833	1.46804
	Petrosimonia sibirica	0.529963	3.25498	43.5429	0.598976	0.530868	1.77049	-0.00125925	0.00125925	-0.0578293	-0.279373	0.428761	1.49575
	Petrosimonia sibirica	0.569098	3.64142	31.8785	0.614555	0.541648	2.0608	0.039682	-0.039682	-0.0575613	-0.420444	0.430011	1.40526
	Petrosimonia sibirica	0.661677	4.91151	42.1202	0.686809	0.610802	2.34787	0.0853826	-0.0853826	-0.0507563	-0.618275	0.522789	1.57201
	Petrosimonia sibirica	0.659304	4.87033	37.7259	0.694208	0.61241	2.20911	0.0786504	-0.0786504	-0.064375	-0.628323	0.513129	1.55136
	Petrosimonia sibirica	0.613929	4.18039	29.9602	0.657424	0.581841	2.08898	0.049919	-0.049919	-0.0553287	-0.472143	0.467573	1.47541
	Petrosimonia sibirica	0.678364	5.21821	32.1959	0.713598	0.635204	2.19326	0.0758387	-0.0758387	-0.0613867	-0.621828	0.53318	1.59288
	Petrosimonia sibirica	0.736053	6.57728	36.0082	0.756522	0.690853	2.36549	0.0919641	-0.0919641	-0.0632114	-0.669761	0.644611	1.88494
	Petrosimonia sibirica	0.754891	7.15963	35.9141	0.765146	0.699552	2.48906	0.117263	-0.117263	-0.0580998	-0.751277	0.668427	1.95874
	Petrosimonia sibirica	0.682753	5.30423	37.304	0.707649	0.6399	2.33471	0.0761002	-0.0761002	-0.0596796	-0.566976	0.584441	1.70549
	Petrosimonia sibirica	0.540483	3.35239	24.6674	0.60526	0.543782	1.80121	-0.00467286	0.00467286	-0.0528493	-0.250758	0.42695	1.38622
	Petrosimonia sibirica	0.579146	3.75224	22.9826	0.651121	0.588911	1.75272	-0.0148188	0.0148188	-0.065311	-0.28151	0.438414	1.33928
	Petrosimonia sibirica	0.677161	5.19504	34.1729	0.705036	0.637919	2.29117	0.0690841	-0.0690841	-0.0549856	-0.562454	0.57336	1.64621
	Petrosimonia sibirica	0.685798	5.36533	40.5813	0.714687	0.648461	2.28445	0.0672386	-0.0672386	-0.0559924	-0.578577	0.579344	1.63592
	Petrosimonia sibirica	0.683121	5.31156	37.9095	0.709896	0.643122	2.30983	0.0713415	-0.0713415	-0.0568429	-0.581238	0.578051	1.64029
	Petrosimonia sibirica	0.709452	5.88354	30.7978	0.729662	0.664818	2.37279	0.0844787	-0.0844787	-0.0500156	-0.613484	0.602846	1.71429
	Petrosimonia sibirica	0.66187	4.91489	30.1553	0.68161	0.61381	2.40741	0.080946	-0.080946	-0.0447331	-0.564237	0.563713	1.60691
	Petrosimonia sibirica	0.624566	4.32717	31.9238	0.647166	0.581339	2.3905	0.0678689	-0.0678689	-0.0406396	-0.490959	0.52306	1.53855
	Petrosimonia sibirica	0.642543	4.59508	30.8561	0.666913	0.606834	2.34967	0.0585326	-0.0585326	-0.0433433	-0.452403	0.539284	1.65478
	Petrosimonia sibirica	0.708133	5.85245	35.3485	0.731761	0.66649	2.33698	0.0788654	-0.0788654	-0.056009	-0.608431	0.604443	1.71663
	Petrosimonia sibirica	0.67352	5.12595	22.9142	0.683925	0.613064	2.52204	0.102977	-0.102977	-0.0658493	-0.632737	0.594565	1.77185
	Petrosimonia sibirica	0.643791	4.61469	28.8506	0.667724	0.604478	2.35069	0.0643587	-0.0643587	-0.0614613	-0.457723	0.559642	1.70663
	Petrosimonia sibirica	0.586228	3.83358	36.3403	0.638145	0.567684	1.98961	0.027793	-0.027793	-0.0565794	-0.402472	0.482885	1.51458
	Petrosimonia sibirica	0.619256	4.25288	34.7349	0.658929	0.565602	2.14644	0.0825775	-0.0825775	-0.0725364	-0.656945	0.533151	1.50196
	Petrosimonia sibirica	0.718014	6.09254	37.8607	0.737486	0.670617	2.39167	0.0914137	-0.0914137	-0.0629079	-0.650647	0.628845	1.84284
	Petrosimonia sibirica	0.611222	4.14432	31.1812	0.638921	0.572574	2.31388	0.0594548	-0.0594548	-0.040388	-0.465072	0.507008	1.50807
	Petrosimonia sibirica	0.667821	5.02086	31.7875	0.697998	0.631395	2.25898	0.0629846	-0.0629846	-0.0535946	-0.526342	0.562941	1.62272
	Petrosimonia sibirica	0.63399	4.46433	31.2792	0.66472	0.601178	2.26036	0.0530197	-0.0530197	-0.0624556	-0.459896	0.541573	1.6444
	Petrosimonia sibirica	0.554966	3.49404	19.0647	0.585767	0.517975	2.24322	0.0519146	-0.0519146	-0.0514302	-0.425188	0.453093	1.40758
	Petrosimonia sibirica	0.607606	4.09692	37.7769	0.632109	0.554241	2.3802	0.0804608	-0.0804608	-0.0537228	-0.544018	0.510642	1.55447
	Petrosimonia sibirica	0.586352	3.83503	32.7005	0.634884	0.579547	2.02607	0.0103084	-0.0103084	-0.0599859	-0.268793	0.502341	1.5722
	Petrosimonia sibirica	0.605886	4.07467	32.5571	0.654067	0.593377	2.03472	0.0195296	-0.0195296	-0.0586556	-0.314063	0.502566	1.58433
	Petrosimonia sibirica	0.64863	4.69201	24.6007	0.68428	0.628913	2.17398	0.0333023	-0.0333023	-0.0486844	-0.37992	0.522071	1.55688
	Petrosimonia sibirica	0.657205	4.83439	30.6555	0.694311	0.633341	2.16986	0.0408798	-0.0408798	-0.0558171	-0.441713	0.539407	1.56901
	Petrosimonia sibirica	0.69216	5.49687	28.1343	0.726173	0.659061	2.1971	0.0608636	-0.0608636	-0.0710962	-0.504724	0.581933	1.80494
	Petrosimonia sibirica	0.592579	3.90893	24.4801	0.636399	0.576812	2.06974	0.0239554	-0.0239554	-0.0532393	-0.303371	0.487206	1.5142
	Petrosimonia sibirica	0.53885	3.33698	25.6544	0.583528	0.526134	2.05299	0.017748	-0.017748	-0.0515745	-0.296163	0.45519	1.48001
	Petrosimonia sibirica	0.638102	4.52642	23.9627	0.673041	0.615049	2.18264	0.0379455	-0.0379455	-0.0498143	-0.388389	0.515197	1.54287
	Petrosimonia sibirica	0.593135	3.91563	22.1967	0.634279	0.581676	2.09748	0.017494	-0.017494	-0.0488047	-0.264291	0.48245	1.54769
	Petrosimonia sibirica	0.619201	4.25212	31.3431	0.663706	0.601504	2.07958	0.0282012	-0.0282012	-0.062997	-0.351995	0.517556	1.61673
	Petrosimonia sibirica	0.628598	4.38501	25.6545	0.653937	0.600341	2.32761	0.0453848	-0.0453848	-0.0458916	-0.372133	0.518614	1.58437
	Petrosimonia sibirica	0.565688	3.60498	24.5707	0.64149	0.585293	1.71115	-0.0293088	0.0293088	-0.0572121	-0.210541	0.419395	1.40899
	Petrosimonia sibirica	0.579679	3.75826	22.175	0.626786	0.56816	2.01861	0.0171761	-0.0171761	-0.0554681	-0.287682	0.476826	1.53509
	Petrosimonia sibirica	0.592776	3.9113	26.0167	0.64039	0.584356	2.02603	0.0128828	-0.0128828	-0.0557919	-0.282182	0.482449	1.53571
	Petrosimonia sibirica	0.601907	4.02395	24.5772	0.648483	0.59044	2.03684	0.0177891	-0.0177891	-0.0581614	-0.291934	0.493725	1.56751
	Petrosimonia sibirica	0.715863	6.03887	42.3826	0.741586	0.676707	2.31673	0.0759477	-0.0759477	-0.0471591	-0.581133	0.581818	1.7737
	Petrosimonia sibirica	0.648832	4.69528	27.0485	0.688257	0.628097	2.13383	0.0349969	-0.0349969	-0.0544735	-0.413198	0.52599	1.5465
	Petrosimonia sibirica	0.612015	4.15483	23.262	0.661569	0.601603	2.00003	0.0164791	-0.0164791	-0.0508811	-0.333872	0.494051	1.58759
	Petrosimonia sibirica	0.645364	4.63959	29.4868	0.68144	0.620864	2.18174	0.0408804	-0.0408804	-0.0538631	-0.426433	0.526365	1.54797
	Petrosimonia sibirica	0.504243	3.03424	22.7873	0.563834	0.506019	1.83169	-0.00238359	0.00238359	-0.0558003	-0.191777	0.417748	1.43031
	Petrosimonia sibirica	0.548303	3.42775	24.6345	0.594326	0.545015	2.03335	0.00469017	-0.00469017	-0.043951	-0.211348	0.436604	1.45836
	Petrosimonia sibirica	0.630267	4.4093	25.2969	0.663482	0.610649	2.21145	0.031892	-0.031892	-0.0481245	-0.334458	0.516916	1.57698
	Petrosimonia sibirica	0.608294	4.10587	23.3109	0.647469	0.58286	2.12749	0.0394055	-0.0394055	-0.0587977	-0.396494	0.510838	1.56224
	Petrosimonia sibirica	0.622893	4.30354	23.362	0.650201	0.593366	2.2921	0.04684	-0.04684	-0.0596967	-0.380531	0.547809	1.64835
	Petrosimonia sibirica	0.625352	4.33834	24.5738	0.645896	0.588787	2.40241	0.0578738	-0.0578738	-0.0543796	-0.427263	0.554119	1.65095
	Petrosimonia sibirica	0.618361	4.24055	20.8757	0.642446	0.586831	2.33324	0.0494867	-0.0494867	-0.0515286	-0.377935	0.533664	1.62121
	Petrosimonia sibirica	0.702977	5.73349	42.0907	0.739151	0.677786	2.19291	0.0481176	-0.0481176	-0.0653549	-0.486553	0.582229	1.7859
	Petrosimonia sibirica	0.668331	5.03011	22.1445	0.69162	0.635333	2.32431	0.0573496	-0.0573496	-0.057967	-0.417428	0.578824	1.74125
	Petrosimonia sibirica	0.596237	3.9534	21.3729	0.623768	0.568378	2.29196	0.0421398	-0.0421398	-0.0475371	-0.35974	0.506708	1.5686
	Petrosimonia sibirica	0.601509	4.01894	24.0261	0.628756	0.570493	2.30504	0.0472211	-0.0472211	-0.0452529	-0.394587	0.495949	1.5195
	Petrosimonia sibirica	0.605268	4.06672	25.1671	0.635951	0.582261	2.25409	0.0355274	-0.0355274	-0.0456255	-0.372325	0.49839	1.51236
	Petrosimonia sibirica	0.593875	3.92459	23.6202	0.613378	0.566899	2.44132	0.0406676	-0.0406676	-0.0263979	-0.346836	0.478726	1.45556
	Petrosimonia sibirica	0.674869	5.15137	24.6358	0.696098	0.637166	2.36017	0.0661457	-0.0661457	-0.043201	-0.512838	0.560849	1.59661
	Petrosimonia sibirica	0.607326	4.09328	21.687	0.626201	0.569702	2.43237	0.0575286	-0.0575286	-0.0379468	-0.399235	0.509658	1.56442
	Petrosimonia sibirica	0.628017	4.37659	19.5448	0.650904	0.5943	2.33942	0.053796	-0.053796	-0.0497972	-0.383338	0.541169	1.63761
	Petrosimonia sibirica	0.654705	4.79214	24.1244	0.677594	0.625198	2.34544	0.049954	-0.049954	-0.0443743	-0.414954	0.540558	1.57746
	Petrosimonia sibirica	0.662173	4.92018	22.8096	0.684206	0.625909	2.34858	0.0619313	-0.0619313	-0.0430276	-0.484851	0.54723	1.57086
	Petrosimonia sibirica	0.614367	4.18627	42.3482	0.658956	0.578022	2.09238	0.0563581	-0.0563581	-0.0701198	-0.520817	0.528319	1.61194
	Petrosimonia sibirica	0.656395	4.82064	27.9905	0.686434	0.628824	2.25555	0.0469503	-0.0469503	-0.0431379	-0.417655	0.542086	1.57152
	Petrosimonia sibirica	0.67887	5.228	23.2475	0.701541	0.644142	2.33219	0.0617156	-0.0617156	-0.0410235	-0.494776	0.565617	1.616
	Petrosimonia sibirica	0.628294	4.38059	15.8415	0.664706	0.602253	2.12526	0.0418923	-0.0418923	-0.0400847	-0.388792	0.505021	1.50146
	Petrosimonia sibirica	0.560419	3.54979	20.1079	0.611886	0.554065	1.95168	0.00921498	-0.00921498	-0.0390396	-0.293144	0.430453	1.39955
	Petrosimonia sibirica	0.597712	3.97156	20.9224	0.633133	0.577859	2.17073	0.0303289	-0.0303289	-0.0438613	-0.337845	0.483103	1.50169
	Petrosimonia sibirica	0.61829	4.23957	24.3646	0.639132	0.586488	2.40166	0.0498944	-0.0498944	-0.0463608	-0.400323	0.51416	1.51109
	Petrosimonia sibirica	0.612673	4.16359	23.0195	0.634019	0.581406	2.39163	0.0485666	-0.0485666	-0.0433225	-0.376375	0.523654	1.60252
	Petrosimonia sibirica	0.657883	4.84595	25.1875	0.685081	0.631454	2.28582	0.0452112	-0.0452112	-0.0436346	-0.406145	0.542514	1.57923
	Petrosimonia sibirica	0.581288	3.77655	20.7747	0.607477	0.553147	2.31854	0.0414773	-0.0414773	-0.0454748	-0.353447	0.483053	1.48004
	Petrosimonia sibirica	0.641744	4.5826	25.6406	0.669365	0.615442	2.28769	0.0434707	-0.0434707	-0.0413304	-0.386708	0.527229	1.55303
	Petrosimonia sibirica	0.645234	4.63752	26.4417	0.665056	0.590225	2.40677	0.0888444	-0.0888444	-0.0642183	-0.597609	0.550159	1.74576
	Petrosimonia sibirica	0.646619	4.65961	22.3528	0.673739	0.617863	2.28092	0.0478886	-0.0478886	-0.0412545	-0.425516	0.528425	1.54303
	Petrosimonia sibirica	0.681597	5.28135	38.1823	0.706494	0.630682	2.33657	0.0893042	-0.0893042	-0.0787799	-0.661357	0.598631	1.83847
	Petrosimonia sibirica	0.66445	4.96036	42.7702	0.694303	0.624849	2.281	0.0677142	-0.0677142	-0.0742151	-0.56432	0.563169	1.68246
	Petrosimonia sibirica	0.65285	4.76121	43.4869	0.700992	0.634831	2.05729	0.0307741	-0.0307741	-0.0617844	-0.419597	0.532047	1.60731
	Petrosimonia sibirica	0.717325	6.07526	40.8867	0.722733	0.649116	2.60753	0.127643	-0.127643	-0.0575415	-0.825672	0.61924	1.85469
	Petrosimonia sibirica	0.615049	4.19547	28.1856	0.615442	0.536135	2.83456	0.117738	-0.117738	-0.0755373	-0.699405	0.550848	1.73578
	Petrosimonia sibirica	0.616519	4.21538	41.7571	0.653119	0.575347	2.19725	0.063804	-0.063804	-0.0580154	-0.511162	0.4975	1.51781
	Petrosimonia sibirica	0.700404	5.67565	43.8915	0.718572	0.652817	2.42942	0.0876749	-0.0876749	-0.0780228	-0.612027	0.61551	1.92064
	Petrosimonia sibirica	0.669098	5.04409	36.4145	0.699356	0.619821	2.26571	0.0841947	-0.0841947	-0.0615908	-0.611144	0.567346	1.7621
	Petrosimonia sibirica	0.67691	5.19022	41.6573	0.697028	0.629734	2.41306	0.0822263	-0.0822263	-0.0743748	-0.573333	0.586124	1.81802
	Petrosimonia sibirica	0.684243	5.33398	41.4782	0.71018	0.643416	2.32563	0.0729376	-0.0729376	-0.0590663	-0.563249	0.570766	1.73135
	Petrosimonia sibirica	0.688244	5.41526	42.9659	0.716895	0.643972	2.28962	0.0795117	-0.0795117	-0.0573404	-0.61122	0.577124	1.72275
	Petrosimonia sibirica	0.680355	5.25693	49.6741	0.697855	0.619854	2.4599	0.104622	-0.104622	-0.0730811	-0.732748	0.580509	1.73319
	Petrosimonia sibirica	0.659012	4.86531	41.8615	0.684674	0.617168	2.34106	0.0705312	-0.0705312	-0.0520942	-0.538151	0.539963	1.63104
	Petrosimonia sibirica	0.695821	5.57508	33.3469	0.715033	0.639829	2.40052	0.100925	-0.100925	-0.081442	-0.682606	0.612435	1.89084
	Petrosimonia sibirica	0.585805	3.82864	42.6709	0.61451	0.533445	2.32709	0.0761588	-0.0761588	-0.0546891	-0.563782	0.495894	1.54197
	Petrosimonia sibirica	0.638317	4.5297	40.8799	0.670325	0.593426	2.25638	0.0722628	-0.0722628	-0.0819994	-0.575578	0.543841	1.69902
	Petrosimonia sibirica	0.5703	3.65441	39.7701	0.621997	0.54782	1.99055	0.0326938	-0.0326938	-0.060993	-0.40149	0.466277	1.56216
	Petrosimonia sibirica	0.644511	4.62605	49.7959	0.69189	0.611473	2.06942	0.0545262	-0.0545262	-0.0672473	-0.572849	0.512866	1.52838
	Petrosimonia sibirica	0.682236	5.29397	31.0327	0.699504	0.618067	2.43313	0.110954	-0.110954	-0.0590393	-0.715319	0.565552	1.74012
	Petrosimonia sibirica	0.603068	4.03865	35.8482	0.640688	0.561569	2.17674	0.0627507	-0.0627507	-0.0626886	-0.482581	0.511837	1.6286
	Petrosimonia sibirica	0.610732	4.13785	42.3016	0.650159	0.574042	2.15943	0.0564971	-0.0564971	-0.0616223	-0.487398	0.49198	1.50114
	Petrosimonia sibirica	0.61356	4.17544	40.2167	0.660097	0.593561	2.06598	0.0314537	-0.0314537	-0.0565168	-0.394296	0.489369	1.52978
	Petrosimonia sibirica	0.598593	3.98247	38.7269	0.647153	0.581529	2.03656	0.0261748	-0.0261748	-0.0557571	-0.36422	0.471066	1.48941
	Petrosimonia sibirica	0.63641	4.5007	45.5557	0.648568	0.567137	2.5879	0.108397	-0.108397	-0.0722349	-0.70212	0.562175	1.72719
	Petrosimonia sibirica	0.667571	5.01632	34.2671	0.693375	0.619388	2.32366	0.0821514	-0.0821514	-0.0703698	-0.596359	0.567345	1.77968
	Petrosimonia sibirica	0.620086	4.26435	41.4366	0.641775	0.575802	2.42542	0.0688751	-0.0688751	-0.0442464	-0.499333	0.526186	1.5758
	Petrosimonia sibirica	0.602348	4.02952	39.1526	0.649237	0.571085	2.05846	0.0476564	-0.0476564	-0.0884454	-0.468705	0.5261	1.68091
	Petrosimonia sibirica	0.628928	4.3898	41.5388	0.670299	0.60312	2.13323	0.0415816	-0.0415816	-0.0552416	-0.430955	0.506521	1.54625
	Petrosimonia sibirica	0.615318	4.19909	34.4272	0.66993	0.601273	1.96638	0.0222927	-0.0222927	-0.0684248	-0.386572	0.507261	1.63686
	Petrosimonia sibirica	0.605625	4.07131	40.8607	0.620262	0.550792	2.56791	0.0822787	-0.0822787	-0.0516695	-0.546118	0.506676	1.59575
	Petrosimonia sibirica	0.599182	3.98979	41.9888	0.626892	0.553883	2.33693	0.0677993	-0.0677993	-0.0532824	-0.517654	0.480887	1.49847
	Petrosimonia sibirica	0.608952	4.11446	34.3213	0.65469	0.579736	2.06776	0.0451572	-0.0451572	-0.0848282	-0.431655	0.533663	1.71329
	Petrosimonia sibirica	0.594496	3.93214	34.626	0.643051	0.578346	2.03059	0.024613	-0.024613	-0.064568	-0.337196	0.492645	1.61865
	Petrosimonia sibirica	0.616205	4.21111	38.1025	0.664928	0.597768	2.03795	0.0291872	-0.0291872	-0.058222	-0.409399	0.484746	1.49616
	Petrosimonia sibirica	0.646537	4.65831	43.5698	0.663856	0.592011	2.48258	0.0883387	-0.0883387	-0.056039	-0.601381	0.540969	1.65799
	Petrosimonia sibirica	0.597488	3.9688	33.764	0.645998	0.579577	2.03064	0.0274	-0.0274	-0.0645599	-0.370894	0.496381	1.61819
	Petrosimonia sibirica	0.557066	3.51535	33.9454	0.557908	0.467713	2.98345	0.120838	-0.120838	-0.0609032	-0.666648	0.504813	1.50704
	Petrosimonia sibirica	0.677177	5.19535	44.5155	0.704159	0.63675	2.31773	0.071074	-0.071074	-0.0505591	-0.533845	0.566	1.72219
	Petrosimonia sibirica	0.670519	5.07015	42.4146	0.68982	0.612566	2.43074	0.0983487	-0.0983487	-0.0808516	-0.6712	0.592027	1.82009
	Petrosimonia sibirica	0.695683	5.57209	45.4575	0.722839	0.655808	2.30931	0.0733309	-0.0733309	-0.0529431	-0.566394	0.583011	1.75947
	Petrosimonia sibirica	0.616253	4.21176	35.0053	0.662722	0.594633	2.06096	0.0341243	-0.0341243	-0.0672779	-0.403843	0.509392	1.64486
	Petrosimonia sibirica	0.554757	3.49193	37.9796	0.597168	0.527825	2.11027	0.0380833	-0.0380833	-0.0467243	-0.393947	0.438358	1.48909
	Petrosimonia sibirica	0.624806	4.33058	37.7448	0.679883	0.604535	1.96862	0.032575	-0.032575	-0.065528	-0.45137	0.52881	1.65753
	Petrosimonia sibirica	0.610493	4.1347	31.034	0.654875	0.584714	2.07954	0.040091	-0.040091	-0.0666809	-0.426616	0.502561	1.62243
	Petrosimonia sibirica	0.644749	4.62983	33.7428	0.678151	0.605706	2.22536	0.0640614	-0.0640614	-0.0783676	-0.507537	0.560348	1.76591
	Petrosimonia sibirica	0.618639	4.24437	31.8999	0.660196	0.589365	2.11739	0.0460714	-0.0460714	-0.0672925	-0.441803	0.512498	1.64965
	Petrosimonia sibirica	0.644229	4.62159	42.8186	0.670186	0.601136	2.34473	0.0703292	-0.0703292	-0.0668392	-0.540852	0.537647	1.65176
	Petrosimonia sibirica	0.659023	4.8655	28.3284	0.696649	0.611151	2.15829	0.0801568	-0.0801568	-0.0841025	-0.609759	0.578912	1.65931
	Petrosimonia sibirica	0.610036	4.12868	34.0644	0.655856	0.581973	2.06655	0.0435091	-0.0435091	-0.0765647	-0.426905	0.525235	1.68697
	Petrosimonia sibirica	0.598916	3.98649	34.859	0.658031	0.588719	1.91169	0.0157514	-0.0157514	-0.0646824	-0.357905	0.485697	1.64576
	Petrosimonia sibirica	0.641999	4.58657	29.7022	0.666737	0.594532	2.3416	0.0767691	-0.0767691	-0.063406	-0.544993	0.539776	1.69336
	Petrosimonia sibirica	0.640583	4.56457	44.7175	0.666803	0.593804	2.34462	0.0754961	-0.0754961	-0.0601624	-0.565681	0.53292	1.6368
	Petrosimonia sibirica	0.622302	4.29523	40.1884	0.668724	0.598818	2.06881	0.0374322	-0.0374322	-0.0606888	-0.434428	0.498325	1.5278
	Petrosimonia sibirica	0.621268	4.28078	32.2177	0.65832	0.586076	2.17702	0.055343	-0.055343	-0.0678083	-0.479175	0.518648	1.65686
	Petrosimonia sibirica	0.687763	5.40539	32.0315	0.723917	0.655829	2.1807	0.0581745	-0.0581745	-0.0786331	-0.508229	0.591695	1.84816
	Petrosimonia sibirica	0.605344	4.0677	28.8352	0.642171	0.572869	2.17478	0.0497155	-0.0497155	-0.0640863	-0.442095	0.50713	1.63501
	Petrosimonia sibirica	0.627994	4.37626	37.005	0.658162	0.5878	2.28058	0.0637131	-0.0637131	-0.0585785	-0.499937	0.517155	1.61593
	Petrosimonia sibirica	0.615613	4.20309	32.3235	0.661213	0.592109	2.06738	0.0369849	-0.0369849	-0.0685442	-0.408396	0.509925	1.64872
	Petrosimonia sibirica	0.539618	3.34422	34.9944	0.56738	0.476731	2.35524	0.0846682	-0.0846682	-0.0764943	-0.576485	0.481141	1.48091
	Petrosimonia sibirica	0.633615	4.45874	40.8558	0.65515	0.586313	2.41798	0.0752608	-0.0752608	-0.0653618	-0.545603	0.531523	1.64513
	Petrosimonia sibirica	0.653931	4.77919	56.6753	0.685599	0.609183	2.27104	0.0743772	-0.0743772	-0.052464	-0.574451	0.530175	1.58227
	Petrosimonia sibirica	0.713422	5.9789	50.5896	0.74295	0.678411	2.27802	0.0678496	-0.0678496	-0.0489688	-0.559542	0.587757	1.73823
	Petrosimonia sibirica	0.706632	5.81738	54.8649	0.735324	0.666204	2.29374	0.0763893	-0.0763893	-0.0542397	-0.60917	0.584553	1.70513
	Petrosimonia sibirica	0.674652	5.14726	61.8903	0.708468	0.63101	2.24087	0.0759922	-0.0759922	-0.0484715	-0.602648	0.544283	1.62249
	Petrosimonia sibirica	0.706281	5.80923	62.1526	0.731844	0.661772	2.33893	0.083568	-0.083568	-0.066746	-0.639349	0.587292	1.72949
	Petrosimonia sibirica	0.674116	5.13715	51.2106	0.712579	0.643496	2.17667	0.0540784	-0.0540784	-0.048742	-0.506856	0.547288	1.61676
	Petrosimonia sibirica	0.659248	4.86937	60.5657	0.682014	0.611086	2.40091	0.0806536	-0.0806536	-0.0612196	-0.565944	0.55669	1.70044
	Petrosimonia sibirica	0.694107	5.53824	49.5553	0.731617	0.657556	2.18519	0.0672418	-0.0672418	-0.0589523	-0.592822	0.566347	1.68979
	Petrosimonia sibirica	0.727267	6.33319	61.6482	0.748778	0.683169	2.3825	0.0876434	-0.0876434	-0.0631366	-0.64706	0.610636	1.79871
	Petrosimonia sibirica	0.610564	4.13563	54.3709	0.613212	0.510911	2.84382	0.144832	-0.144832	-0.0681902	-0.901947	0.542086	1.54016
	Petrosimonia sibirica	0.675186	5.15737	55.353	0.709683	0.636681	2.2283	0.0675379	-0.0675379	-0.0470266	-0.560321	0.549114	1.66111
	Petrosimonia sibirica	0.65756	4.84044	44.8426	0.684725	0.612611	2.32339	0.0752704	-0.0752704	-0.0617201	-0.536172	0.557624	1.71343
	Petrosimonia sibirica	0.717239	6.07311	60.9291	0.737701	0.668218	2.40156	0.0941384	-0.0941384	-0.0642017	-0.676514	0.603142	1.77371
	Petrosimonia sibirica	0.628908	4.3895	51.4743	0.665368	0.590751	2.20654	0.0607129	-0.0607129	-0.0618658	-0.513607	0.503089	1.55317
	Petrosimonia sibirica	0.717318	6.07509	63.0834	0.736497	0.667783	2.42058	0.0950799	-0.0950799	-0.0643194	-0.670002	0.603246	1.77482
	Petrosimonia sibirica	0.697042	5.60157	48.7901	0.729613	0.658096	2.24323	0.0719511	-0.0719511	-0.0504516	-0.596168	0.572709	1.7055
	Petrosimonia sibirica	0.656885	4.82894	46.8724	0.688483	0.612248	2.26364	0.0746649	-0.0746649	-0.0753926	-0.562578	0.559684	1.71358
	Petrosimonia sibirica	0.673553	5.12657	48.9541	0.70913	0.637361	2.21035	0.0634175	-0.0634175	-0.0480945	-0.544857	0.545428	1.59892
	Petrosimonia sibirica	0.617535	4.22923	46.0923	0.662761	0.586131	2.08821	0.049219	-0.049219	-0.0444857	-0.475358	0.485073	1.52681
	Petrosimonia sibirica	0.666833	5.00299	57.5987	0.707286	0.63352	2.15712	0.0576789	-0.0576789	-0.0499923	-0.538029	0.53061	1.59832
	Petrosimonia sibirica	0.536477	3.31478	25.5323	0.608008	0.543064	1.73003	-0.00929509	0.00929509	-0.0507947	-0.28884	0.388609	1.43571
	Petrosimonia sibirica	0.634857	4.47731	45.0644	0.666578	0.596541	2.26602	0.0616726	-0.0616726	-0.0433931	-0.516349	0.501376	1.55354
	Petrosimonia sibirica	0.624885	4.3317	36.4055	0.6643	0.597256	2.15213	0.0440803	-0.0440803	-0.0444332	-0.43945	0.487581	1.54731
	Petrosimonia sibirica	0.609497	4.1216	36.7116	0.644262	0.574871	2.21781	0.053302	-0.053302	-0.0398864	-0.469548	0.476276	1.51616
	Petrosimonia sibirica	0.630604	4.41424	33.7256	0.683967	0.608764	1.98398	0.0354482	-0.0354482	-0.0562304	-0.465527	0.504257	1.56966
	Petrosimonia sibirica	0.674085	5.13657	40.4848	0.707782	0.636136	2.22545	0.0664382	-0.0664382	-0.0420691	-0.566657	0.541012	1.62669
	Petrosimonia sibirica	0.657835	4.84513	43.1071	0.707369	0.627185	2.04259	0.0521766	-0.0521766	-0.0500991	-0.553867	0.527391	1.56732
	Petrosimonia sibirica	0.696995	5.60056	37.5268	0.740858	0.671919	2.10246	0.0471652	-0.0471652	-0.0692781	-0.5356	0.570544	1.72191
	Petrosimonia sibirica	0.654381	4.78672	39.1492	0.703994	0.626795	2.03715	0.0467697	-0.0467697	-0.0630983	-0.530459	0.523747	1.56944
	Petrosimonia sibirica	0.671611	5.09035	41.8235	0.718767	0.645747	2.06945	0.0456726	-0.0456726	-0.0689297	-0.525221	0.541062	1.62285
	Petrosimonia sibirica	0.637697	4.52024	40.4353	0.679897	0.597022	2.12198	0.0656802	-0.0656802	-0.0613598	-0.524273	0.52082	1.66008
	Petrosimonia sibirica	0.436615	2.54997	23.4094	0.500269	0.432964	1.72538	0.00450188	-0.00450188	-0.0413494	-0.26213	0.342108	1.39362
	Petrosimonia sibirica	0.580373	3.76614	34.2373	0.630198	0.554282	2.01058	0.0384648	-0.0384648	-0.0439189	-0.435937	0.428044	1.41252
	Petrosimonia sibirica	0.613949	4.18066	40.4873	0.642786	0.552272	2.31066	0.0933175	-0.0933175	-0.0605253	-0.594765	0.508437	1.64643
	Petrosimonia sibirica	0.492777	2.94304	33.9135	0.520799	0.44852	2.37508	0.0568141	-0.0568141	-0.0480238	-0.416409	0.409108	1.46081
	Petrosimonia sibirica	0.425531	2.48148	18.9239	0.494806	0.414956	1.63169	0.0128422	-0.0128422	-0.0590042	-0.292514	0.322743	1.27517
	Petrosimonia sibirica	0.514755	3.12163	23.6414	0.571576	0.473748	1.87488	0.0542323	-0.0542323	-0.0733724	-0.51429	0.43187	1.40788
	Petrosimonia sibirica	0.493623	2.94963	24.2363	0.539927	0.456773	2.01343	0.0475777	-0.0475777	-0.070543	-0.420245	0.439803	1.4035
	Petrosimonia sibirica	0.500384	3.00307	22.7432	0.495217	0.385476	3.36673	0.142368	-0.142368	-0.0741576	-0.792032	0.511429	1.49496
	Petrosimonia sibirica	0.480898	2.85281	22.0801	0.488849	0.39929	2.91135	0.101003	-0.101003	-0.0586103	-0.587936	0.44593	1.39355
	Petrosimonia sibirica	0.522083	3.18483	27.9742	0.587317	0.517201	1.7892	0.00668855	-0.00668855	-0.0477788	-0.324149	0.393272	1.48134
	Petrosimonia sibirica	0.524372	3.20497	30.7869	0.55415	0.46982	2.31533	0.072385	-0.072385	-0.0687983	-0.49536	0.49306	1.48579
	Petrosimonia sibirica	0.529956	3.25492	23.1194	0.57363	0.463187	2.05881	0.0884904	-0.0884904	-0.0755048	-0.64509	0.449271	1.36186
	Petrosimonia sibirica	0.481812	2.8596	21.1596	0.554735	0.486487	1.65728	-0.00610636	0.00610636	-0.0532803	-0.24295	0.406419	1.42501
	Petrosimonia sibirica	0.425545	2.48156	13.7915	0.535659	0.477749	1.25076	-0.065526	0.065526	-0.0551544	-0.0621543	0.294893	1.20672
	Petrosimonia sibirica	0.426202	2.48555	17.6134	0.484003	0.389539	1.7786	0.0439615	-0.0439615	-0.0544884	-0.432771	0.343241	1.28051
	Petrosimonia sibirica	0.446898	2.61597	24.2356	0.523612	0.441355	1.58545	0.00690452	-0.00690452	-0.0594757	-0.354131	0.327419	1.26552
	Petrosimonia sibirica	0.407159	2.37358	23.4787	0.479539	0.403831	1.58256	0.00398265	-0.00398265	-0.0513122	-0.278207	0.328226	1.26411
	Petrosimonia sibirica	0.564752	3.59508	40.8729	0.623664	0.540926	1.9031	0.0343065	-0.0343065	-0.0577924	-0.4434	0.416233	1.40772
	Petrosimonia sibirica	0.480112	2.84698	24.9691	0.517339	0.441534	2.16903	0.0489559	-0.0489559	-0.0419903	-0.422676	0.423863	1.41139
	Petrosimonia sibirica	0.650609	4.72425	38.4584	0.70044	0.626629	2.03325	0.0404864	-0.0404864	-0.0629468	-0.509261	0.519247	1.58836
	Petrosimonia sibirica	0.607371	4.09386	34.0078	0.66609	0.581531	1.91866	0.0399507	-0.0399507	-0.0566205	-0.491462	0.455437	1.49073
	Petrosimonia sibirica	0.587671	3.85049	37.7634	0.633975	0.556895	2.06146	0.0457473	-0.0457473	-0.0495229	-0.457134	0.453031	1.45842
	Petrosimonia sibirica	0.665152	4.97286	42.1242	0.701089	0.632504	2.20053	0.056358	-0.056358	-0.0406803	-0.529136	0.529216	1.59715
	Petrosimonia sibirica	0.603321	4.04186	39.0093	0.642259	0.570608	2.16262	0.0498872	-0.0498872	-0.0444291	-0.461484	0.465767	1.49916
	Petrosimonia sibirica	0.463589	2.72848	37.7838	0.511581	0.429065	1.99866	0.0430968	-0.0430968	-0.0481985	-0.385142	0.33096	1.37251
	Petrosimonia sibirica	0.545509	3.40053	28.0972	0.619734	0.540363	1.71546	0.00729643	-0.00729643	-0.066945	-0.351668	0.428979	1.43168
	Petrosimonia sibirica	0.551162	3.45595	32.1159	0.59744	0.515414	2.04623	0.0499332	-0.0499332	-0.0742654	-0.473843	0.461316	1.50959
	Petrosimonia sibirica	0.618908	4.24807	37.9412	0.65607	0.589986	2.18464	0.0455558	-0.0455558	-0.0527892	-0.461266	0.482587	1.60633
	Petrosimonia sibirica	0.604252	4.05372	38.9259	0.586352	0.519038	3.4631	0.124152	-0.124152	-0.0393433	-0.683733	0.481083	1.59689
	Petrosimonia sibirica	0.638639	4.53463	23.8169	0.700423	0.617663	1.88362	0.0346404	-0.0346404	-0.0861122	-0.475951	0.526957	1.63264
	Petrosimonia sibirica	0.578567	3.74571	31.5811	0.615583	0.533529	2.18042	0.0651476	-0.0651476	-0.0746259	-0.5071	0.499397	1.56304
	Petrosimonia sibirica	0.555588	3.50033	32.6534	0.618452	0.558415	1.84504	-0.00409793	0.00409793	-0.0587685	-0.290619	0.416799	1.57753
	Petrosimonia sibirica	0.638177	4.52756	32.7433	0.690559	0.62484	1.9953	0.0221823	-0.0221823	-0.050546	-0.392511	0.49281	1.61471
	Petrosimonia sibirica	0.605929	4.07523	25.7255	0.63151	0.553381	2.33566	0.0790558	-0.0790558	-0.0560527	-0.554311	0.495634	1.64722
	Petrosimonia sibirica	0.602967	4.03736	27.5845	0.674712	0.604441	1.77999	-0.0023194	0.0023194	-0.0636992	-0.357282	0.459249	1.58457
	Petrosimonia sibirica	0.698559	5.63479	35.725	0.737418	0.670526	2.15472	0.052732	-0.052732	-0.0776902	-0.524091	0.583086	1.87659
	Petrosimonia sibirica	0.588886	3.86483	31.4218	0.622072	0.542456	2.23643	0.0682241	-0.0682241	-0.0575821	-0.552771	0.454562	1.47731
	Petrosimonia sibirica	0.655418	4.80413	30.933	0.709043	0.642623	1.98422	0.0221049	-0.0221049	-0.0748254	-0.431139	0.509197	1.67797
	Petrosimonia sibirica	0.648421	4.68862	37.7869	0.673794	0.612957	2.34466	0.058856	-0.058856	-0.0481289	-0.490644	0.506103	1.66648
	Petrosimonia sibirica	0.573629	3.69075	31.7568	0.619536	0.542655	2.05545	0.0449746	-0.0449746	-0.056541	-0.447187	0.455972	1.49652
	Bare land	0.15575	1.36897	3.99179	0.315207	0.286712	0.436023	-0.137084	0.137084	-0.0541684	0.183866	0.0126367	1.039
	Bare land	0.134705	1.31135	4.41124	0.285353	0.262251	0.406746	-0.132216	0.132216	-0.0493273	0.204328	0.0251242	1.04721
	Bare land	0.0910861	1.20043	3.52828	0.276571	0.250315	0.2325	-0.162944	0.162944	-0.0545919	0.217488	-0.0382331	1.01221
	Bare land	0.165936	1.3979	4.23342	0.310684	0.286574	0.502901	-0.126661	0.126661	-0.0445292	0.173928	0.0296461	1.06757
	Bare land	0.147866	1.34705	4.69778	0.292751	0.268887	0.458148	-0.126032	0.126032	-0.0449829	0.184389	0.0293845	1.05083
	Bare land	0.156185	1.37019	3.65024	0.270009	0.255	0.591429	-0.102914	0.102914	-0.0332702	0.159823	0.0314062	1.05328
	Bare land	0.166475	1.39945	4.02356	0.329061	0.301242	0.453883	-0.141882	0.141882	-0.049748	0.188194	0.0160503	1.0503
	Bare land	0.094784	1.20942	4.27153	0.300742	0.260717	0.219771	-0.170137	0.170137	-0.0747052	0.213029	-0.0220791	0.998996
	Bare land	0.163203	1.39007	5.23348	0.333276	0.304428	0.433181	-0.148608	0.148608	-0.0527349	0.215446	0.0349287	1.05815
	Bare land	0.154474	1.36539	3.61704	0.315312	0.294433	0.427712	-0.146628	0.146628	-0.0453222	0.199273	-0.00249752	1.02664
	Bare land	0.121655	1.27701	5.44623	0.2425	0.243116	0.465148	-0.125162	0.125162	-0.0546221	0.177032	0.038469	1.05891
	Bare land	0.196701	1.48973	5.2744	0.356214	0.32728	0.537264	-0.139564	0.139564	-0.0586927	0.204356	0.0601926	1.07243
	Bare land	0.176633	1.42905	5.48313	0.327432	0.289493	0.51646	-0.118942	0.118942	-0.0613454	0.150038	0.0714667	1.0708
	Bare land	0.183428	1.44926	4.20453	0.348783	0.316521	0.486608	-0.141296	0.141296	-0.0620578	0.161468	0.0239811	1.05393
	Bare land	0.140102	1.32586	6.80594	0.31349	0.288778	0.374302	-0.154945	0.154945	-0.0453088	0.212883	-0.00369954	1.00814
	Bare land	0.180936	1.44181	6.3529	0.353737	0.314219	0.470205	-0.141318	0.141318	-0.0636763	0.164234	0.0446126	1.06907
	Bare land	0.143778	1.33584	5.51461	0.33575	0.295868	0.347732	-0.158847	0.158847	-0.0760119	0.226171	0.0417401	1.04455
	Bare land	0.161563	1.38539	5.1757	0.343572	0.307455	0.404242	-0.153518	0.153518	-0.0751852	0.223386	0.0501094	1.05119
	Bare land	0.171079	1.41278	5.64527	0.335127	0.306471	0.46708	-0.142884	0.142884	-0.0565036	0.179881	0.0284678	1.05307
	Bare land	0.203966	1.51246	7.61584	0.391793	0.354987	0.488477	-0.16281	0.16281	-0.0683329	0.193428	0.0455717	1.06449
	Bare land	0.155586	1.36851	6.36919	0.332929	0.299163	0.402337	-0.150586	0.150586	-0.063941	0.179213	-0.0215714	0.983961
	Bare land	0.150211	1.35352	7.29999	0.238999	0.242596	0.757412	-0.0958792	0.0958792	-0.0454298	0.152338	0.0633288	1.07873
	Bare land	0.206041	1.51902	6.45964	0.368374	0.340139	0.554361	-0.144204	0.144204	-0.0527066	0.178377	0.0267911	1.0481
	Bare land	0.161855	1.38622	6.44914	0.355302	0.322347	0.386134	-0.169326	0.169326	-0.0618251	0.22519	0.00576489	1.03374
	Bare land	0.146435	1.34311	6.20521	0.336472	0.299149	0.357826	-0.15971	0.15971	-0.0674032	0.21163	0.0223156	1.05858
	Bare land	0.154896	1.36657	5.63802	0.323889	0.296997	0.417077	-0.148954	0.148954	-0.0510065	0.203781	-0.000997512	1.03898
	Bare land	0.16869	1.40584	5.56103	0.349736	0.3173	0.422907	-0.157014	0.157014	-0.0645249	0.217315	0.039085	1.07171
	Bare land	0.119774	1.27214	4.62738	0.339132	0.307525	0.259441	-0.194931	0.194931	-0.0662431	0.256811	-0.0324344	1.01952
	Bare land	0.182988	1.44794	6.01671	0.338415	0.299065	0.519788	-0.122798	0.122798	-0.0684464	0.120741	0.0414241	1.06614
	Bare land	0.153947	1.36392	6.75195	0.327032	0.28909	0.407932	-0.141438	0.141438	-0.0714097	0.175284	0.0493377	1.07456
	Bare land	0.129769	1.29824	5.04886	0.302184	0.275623	0.348488	-0.151264	0.151264	-0.049081	0.195038	-0.0370957	0.957882
	Bare land	0.127497	1.29225	6.28331	0.280375	0.238072	0.386272	-0.114037	0.114037	-0.0670229	0.151372	0.0804344	1.05779
	Bare land	0.17424	1.42201	5.89361	0.330763	0.301576	0.495277	-0.134398	0.134398	-0.0513472	0.156348	0.00105239	0.999275
	Bare land	0.183438	1.44929	5.5955	0.334368	0.306383	0.533002	-0.130266	0.130266	-0.0461008	0.163785	0.0270647	1.05359
	Bare land	0.163343	1.39047	5.87966	0.349703	0.31562	0.401327	-0.160554	0.160554	-0.0653203	0.218538	0.0330941	1.05409
	Bare land	0.251254	1.67113	10.2577	0.450647	0.403748	0.561113	-0.16971	0.16971	-0.0804219	0.209269	0.126502	1.13794
	Bare land	0.258318	1.69657	4.35838	0.425411	0.390587	0.638548	-0.147111	0.147111	-0.0547134	0.182518	0.0938653	1.12308
	Bare land	0.122571	1.27939	4.91265	0.28753	0.260609	0.344659	-0.142593	0.142593	-0.0519325	0.190652	-0.0213745	0.976651
	Bare land	0.135256	1.31282	4.25755	0.322408	0.293124	0.334042	-0.164386	0.164386	-0.0590135	0.230811	-0.00182726	1.03211
	Bare land	0.195376	1.48563	7.69313	0.36515	0.322567	0.512885	-0.135747	0.135747	-0.0639603	0.156613	0.0777474	1.09849
	Bare land	0.118602	1.26912	6.4535	0.296823	0.256488	0.312984	-0.142212	0.142212	-0.074274	0.189141	0.0414295	1.06692
	Bare land	0.0971083	1.21511	3.88235	0.28494	0.249507	0.244546	-0.156182	0.156182	-0.0545208	0.201053	-0.0479903	0.982748
	Bare land	0.109931	1.24702	3.70862	0.258858	0.227299	0.341685	-0.120376	0.120376	-0.0509373	0.167833	0.0216298	1.02426
	Bare land	0.0987942	1.21925	3.36627	0.269091	0.23753	0.271636	-0.14207	0.14207	-0.058357	0.178924	-0.0302158	0.977791
	Bare land	0.110846	1.24933	6.67106	0.293963	0.25616	0.286705	-0.149561	0.149561	-0.0591218	0.186625	-0.0251065	0.963566
	Bare land	0.114685	1.25908	5.91071	0.303727	0.265578	0.286634	-0.155634	0.155634	-0.0547846	0.197255	-0.0390853	0.954067
	Bare land	0.0834189	1.18202	4.0541	0.274884	0.238006	0.208293	-0.157719	0.157719	-0.0605196	0.203317	-0.0270477	0.9857
	Bare land	0.112056	1.25239	3.8749	0.257147	0.237962	0.357054	-0.129355	0.129355	-0.0351563	0.175141	-0.0261623	1.0175
	Bare land	0.115978	1.26239	5.24772	0.290932	0.251244	0.310594	-0.139327	0.139327	-0.0686715	0.183858	0.0210131	1.05517
	Bare land	0.118447	1.26872	2.99736	0.277216	0.254061	0.340408	-0.139821	0.139821	-0.0500612	0.189573	-0.0480362	0.96834
	Bare land	0.16005	1.3811	4.4378	0.322296	0.294688	0.441455	-0.141303	0.141303	-0.0506796	0.186582	0.0240669	1.0482
	Bare land	0.164704	1.39436	5.18555	0.337025	0.302838	0.43149	-0.145386	0.145386	-0.0600449	0.14317	0.011984	1.04221
	Bare land	0.123352	1.28142	4.24542	0.315622	0.286569	0.299593	-0.169198	0.169198	-0.0602172	0.201935	-0.0203647	1.01796
	Bare land	0.201551	1.50486	8.09114	0.344023	0.299103	0.613079	-0.10381	0.10381	-0.0679321	0.118161	0.135528	1.11965
	Bare land	0.182646	1.44692	6.49461	0.343279	0.313643	0.505495	-0.138957	0.138957	-0.0580554	0.152819	0.0149321	1.021
	Bare land	0.146985	1.34463	4.71745	0.322937	0.284309	0.381821	-0.143312	0.143312	-0.0656934	0.187805	0.0405896	1.04372
	Bare land	0.0840289	1.18348	2.76993	0.303177	0.264038	0.183212	-0.184093	0.184093	-0.0689572	0.23129	-0.0377324	1.00425
	Bare land	0.204272	1.51342	5.20135	0.353723	0.323842	0.585234	-0.128039	0.128039	-0.0546621	0.155603	0.0407419	1.07008
	Bare land	0.10587	1.23681	4.46008	0.28175	0.239248	0.283011	-0.136844	0.136844	-0.069524	0.152793	-0.0186526	0.984766
	Bare land	0.0909376	1.20007	3.85044	0.277882	0.238253	0.230927	-0.150578	0.150578	-0.0665286	0.19049	-0.0249217	0.997283
	Bare land	0.135546	1.3136	4.28419	0.314692	0.279665	0.348249	-0.149797	0.149797	-0.0596999	0.197524	0.00312122	1.02768
	Bare land	0.0809978	1.17627	4.71798	0.260068	0.21754	0.216745	-0.138991	0.138991	-0.0773652	0.177352	0.015307	1.03426
	Bare land	0.076203	1.16498	4.07306	0.244033	0.204424	0.21753	-0.13025	0.13025	-0.0716438	0.17011	0.0116314	1.03022
	Bare land	0.14511	1.33948	4.6649	0.272547	0.243314	0.508395	-0.101798	0.101798	-0.0409578	0.125118	0.0449182	1.07076
	Bare land	0.136993	1.31748	5.30052	0.382299	0.328198	0.267971	-0.200207	0.200207	-0.0972204	0.274273	0.0475709	1.06916
	Bare land	0.194962	1.48436	3.31913	0.326245	0.30048	0.613204	-0.112083	0.112083	-0.0456624	0.16081	0.0528064	1.05654
	Bare land	0.136668	1.3166	6.25843	0.305152	0.265267	0.375106	-0.133437	0.133437	-0.0695722	0.162934	0.0215561	1.04554
	Bare land	0.0825301	1.17991	2.82614	0.298881	0.25807	0.182327	-0.17936	0.17936	-0.07757	0.227567	-0.0252779	0.996583
	Bare land	0.066317	1.14205	2.4963	0.241237	0.207181	0.180919	-0.142826	0.142826	-0.0622359	0.185438	-0.0357336	0.979262
	Bare land	0.148135	1.34779	4.32249	0.323785	0.287314	0.38393	-0.145366	0.145366	-0.0656811	0.147755	-0.00190872	1.02837
	Bare land	0.0634635	1.13553	3.25723	0.231543	0.194856	0.181864	-0.133038	0.133038	-0.0649625	0.16928	-0.0238557	1.0178
	Bare land	0.0540858	1.11436	3.18981	0.243079	0.203245	0.138705	-0.150817	0.150817	-0.0744047	0.182078	-0.038606	1.02065
	Bare land	0.0537952	1.11371	2.89404	0.23655	0.202383	0.142422	-0.150223	0.150223	-0.062528	0.211955	-0.0421315	0.977025
	Bare land	0.115128	1.26021	3.4568	0.275189	0.239445	0.331356	-0.127841	0.127841	-0.0657516	0.159405	0.0115118	1.03629
	Bare land	0.188285	1.46392	5.36617	0.421944	0.375862	0.375707	-0.201862	0.201862	-0.0845726	0.228516	0.0119785	1.05999
	Bare land	0.169979	1.40958	6.31567	0.343058	0.296738	0.44455	-0.133491	0.133491	-0.0720014	0.184798	0.102473	1.09346
	Bare land	0.217463	1.55579	3.48493	0.383397	0.342424	0.552593	-0.135014	0.135014	-0.0714973	0.169037	0.105788	1.12333
	Bare land	0.144644	1.33821	4.76736	0.313567	0.276504	0.390659	-0.137354	0.137354	-0.0734634	0.17092	0.0333246	1.06169
	Bare land	0.0464719	1.09747	1.88823	0.221883	0.191514	0.127756	-0.146344	0.146344	-0.0603444	0.196733	-0.03584	0.99454
	Bare land	0.121003	1.27532	2.81328	0.285476	0.262365	0.334678	-0.145997	0.145997	-0.0403556	0.197371	-0.0221706	0.994562
	Bare land	0.146936	1.34449	3.00377	0.301779	0.27742	0.419965	-0.136029	0.136029	-0.0362278	0.182728	-0.0281159	0.942733
	Bare land	0.09363	1.2066	4.86937	0.255347	0.223284	0.274595	-0.132423	0.132423	-0.0599222	0.171116	-0.0153749	0.999237
	Bare land	0.119706	1.27197	4.71437	0.28235	0.253287	0.341523	-0.137758	0.137758	-0.055632	0.165009	-0.0152267	0.999889
	Bare land	0.0984458	1.21839	4.23656	0.281692	0.242198	0.254096	-0.147264	0.147264	-0.0727385	0.209309	0.0228445	1.04046
	Bare land	0.0974158	1.21586	3.81895	0.271328	0.238487	0.263786	-0.144427	0.144427	-0.0560527	0.179466	-0.0383053	1.01031
	Bare land	0.111688	1.25146	5.42029	0.309125	0.274216	0.268137	-0.167663	0.167663	-0.0639498	0.215479	-0.0256943	1.00573
	Bare land	0.188555	1.46474	7.48905	0.35639	0.312191	0.502066	-0.131369	0.131369	-0.0753227	0.188413	0.122885	1.09822
	Bare land	0.148977	1.35011	5.35023	0.350112	0.318323	0.344412	-0.177776	0.177776	-0.0619511	0.219234	-0.00383085	1.02619
	Bare land	0.094634	1.20905	3.38421	0.248447	0.220873	0.288418	-0.128934	0.128934	-0.0512302	0.187995	0.00122285	1.01911
	Bare land	0.102352	1.22805	4.06734	0.246738	0.227302	0.331588	-0.127926	0.127926	-0.0370385	0.182608	-0.0353777	0.965728
	Bare land	0.0984642	1.21844	4.2391	0.245916	0.236432	0.314012	-0.141257	0.141257	-0.0622144	0.195813	-0.0105098	1.01774
	Bare land	0.0928266	1.20465	4.69341	0.251912	0.23814	0.276643	-0.148598	0.148598	-0.0677765	0.183071	-0.0401247	0.958603
	Bare land	0.119944	1.27258	3.88534	0.262748	0.235979	0.38494	-0.119415	0.119415	-0.0487315	0.155542	0.00275379	1.02569
	Bare land	0.0918896	1.20238	2.81957	0.238062	0.218694	0.29341	-0.129405	0.129405	-0.0328472	0.17855	-0.0547179	0.992149
	Bare land	0.177315	1.43106	6.40748	0.35821	0.334292	0.444079	-0.166869	0.166869	-0.0425311	0.219206	-0.0209017	1.02379
	Bare land	0.180363	1.4401	7.14903	0.350778	0.310803	0.476198	-0.138187	0.138187	-0.0519861	0.142407	0.000323289	0.964864
	Bare land	0.162555	1.38822	5.20643	0.363839	0.330963	0.372382	-0.177983	0.177983	-0.0567116	0.231181	-0.0213099	0.962533
	Bare land	0.18798	1.46299	6.33474	0.353227	0.32771	0.505052	-0.148902	0.148902	-0.0399179	0.166557	0.00550729	1.04494
	Bare land	0.213057	1.54148	4.10521	0.339076	0.310506	0.688133	-0.104353	0.104353	-0.0286908	0.124578	0.0447444	1.07948
	Bare land	0.133203	1.30735	3.30989	0.322786	0.291386	0.32279	-0.16457	0.16457	-0.0551045	0.197239	-0.00731363	1.02359
	Bare land	0.134041	1.30958	3.74294	0.341004	0.304068	0.301656	-0.177251	0.177251	-0.0658654	0.205299	-0.00940865	1.0165
	Bare land	0.174868	1.42385	5.77369	0.362485	0.33078	0.423762	-0.165485	0.165485	-0.0609485	0.207366	0.003647	1.02483
	Bare land	0.215136	1.54821	6.21634	0.39182	0.351875	0.534839	-0.147938	0.147938	-0.0802625	0.13922	0.0493531	1.08192
	Bare land	0.15424	1.36474	6.42607	0.337231	0.289778	0.38827	-0.141879	0.141879	-0.0749066	0.157286	0.0509969	1.07642
	Bare land	0.089003	1.1954	5.97516	0.285963	0.24383	0.21711	-0.158262	0.158262	-0.072235	0.178023	-0.00344985	1.01686
	Bare land	0.125435	1.28685	4.42257	0.322243	0.291076	0.298234	-0.171918	0.171918	-0.0528547	0.236632	-0.0423076	0.941059
	Bare land	0.104294	1.23288	5.56814	0.294879	0.259285	0.259962	-0.159298	0.159298	-0.0667906	0.190515	-0.0263276	0.986942
	Bare land	0.196111	1.48791	6.74802	0.353074	0.323589	0.548265	-0.136115	0.136115	-0.0524471	0.193869	0.0594573	1.07417
	Bare land	0.176419	1.42842	5.01266	0.369145	0.337225	0.415517	-0.170978	0.170978	-0.0639949	0.252549	0.0413544	1.0565
	Bare land	0.140548	1.32706	3.59154	0.278325	0.247766	0.454455	-0.111087	0.111087	-0.0554987	0.133636	0.0264314	1.04212
	Bare land	0.148643	1.34919	4.91512	0.322752	0.283234	0.389836	-0.140506	0.140506	-0.072531	0.189428	0.0480896	1.04395
	Bare land	0.132735	1.3061	4.42265	0.292555	0.261802	0.379989	-0.133714	0.133714	-0.0596478	0.145733	-0.0207627	0.982138
	Bare land	0.142094	1.33126	5.47775	0.311465	0.280249	0.385221	-0.143885	0.143885	-0.0669369	0.171352	0.0109179	1.04365
	Bare land	0.197681	1.49278	4.07828	0.349551	0.317323	0.555551	-0.127649	0.127649	-0.0475433	0.13372	0.0281346	1.03633
	Bare land	0.238956	1.62797	3.86757	0.367533	0.33017	0.732423	-0.0990272	0.0990272	-0.0467245	0.0674687	0.0639763	1.05665
	Bare land	0.162662	1.38852	4.91773	0.326347	0.291675	0.445903	-0.135439	0.135439	-0.0618295	0.179107	0.0460297	1.05684
	Bare land	0.253984	1.68091	6.13144	0.423886	0.390662	0.632539	-0.151733	0.151733	-0.0511096	0.192302	0.091495	1.10311
	Bare land	0.166507	1.39954	5.69129	0.324087	0.294627	0.473049	-0.13473	0.13473	-0.0569796	0.194844	0.041584	1.05964
	Bare land	0.196094	1.48785	7.19496	0.348996	0.316499	0.561902	-0.128372	0.128372	-0.058198	0.154876	0.0672021	1.09165
	Bare land	0.215228	1.54851	6.10888	0.34325	0.32127	0.699631	-0.113919	0.113919	-0.0361248	0.155433	0.0651253	1.08708
	Bare land	0.0848495	1.18543	4.88827	0.283813	0.2434	0.204801	-0.161894	0.161894	-0.0717121	0.194558	-0.0448663	0.967445
	Bare land	0.131588	1.30305	3.14204	0.29093	0.27132	0.372938	-0.144905	0.144905	-0.0348326	0.194548	-0.0323329	1.01424
	Bare land	0.122766	1.27989	4.57696	0.31188	0.268805	0.303443	-0.151023	0.151023	-0.0717708	0.20713	0.0398942	1.05372
	Bare land	0.0869129	1.19037	3.93982	0.261981	0.230118	0.235885	-0.146127	0.146127	-0.0584636	0.196097	-0.0447396	0.984706
	Bare land	0.132	1.30415	6.58749	0.308805	0.273647	0.348025	-0.146956	0.146956	-0.0727843	0.190372	0.0273147	1.05718
	Bare land	0.123394	1.28153	3.97652	0.280488	0.249716	0.360633	-0.130338	0.130338	-0.0463103	0.174777	-0.00162141	1.0168
	Bare land	0.248652	1.66188	4.87736	0.422761	0.386127	0.603756	-0.152076	0.152076	-0.0555866	0.206358	0.0782142	1.02371
	Bare land	0.165147	1.39563	4.38602	0.322279	0.292098	0.466336	-0.133386	0.133386	-0.0511939	0.191527	0.050184	1.04657
	Bare land	0.126934	1.29078	4.24625	0.323847	0.279048	0.301037	-0.1577	0.1577	-0.0801363	0.222948	0.0432822	1.04828
	Bare land	0.124773	1.28512	4.36958	0.301897	0.264725	0.326665	-0.144733	0.144733	-0.0654997	0.192056	0.0163963	1.03971
	Bare land	0.179059	1.43623	6.28894	0.365967	0.316642	0.435227	-0.145853	0.145853	-0.0763568	0.15913	0.0710066	1.08686
	Bare land	0.14105	1.32842	5.048	0.317259	0.289447	0.368264	-0.154714	0.154714	-0.0461189	0.206639	-0.0349955	0.936664
	Bare land	0.137384	1.31853	5.13456	0.31703	0.277012	0.353533	-0.145152	0.145152	-0.0657047	0.182113	0.0232569	1.05048
	Bare land	0.132507	1.30549	5.35786	0.291579	0.255195	0.383378	-0.126983	0.126983	-0.0610154	0.150787	0.0221834	1.03927
	Bare land	0.106001	1.23714	5.38143	0.284081	0.25647	0.281224	-0.154674	0.154674	-0.0510309	0.213605	-0.0323715	0.995827
	Bare land	0.176059	1.42736	5.27031	0.389134	0.362387	0.381448	-0.199026	0.199026	-0.0526002	0.263177	-0.0198947	1.03017
	Bare land	0.155313	1.36774	4.53935	0.374317	0.32479	0.33087	-0.178481	0.178481	-0.0830234	0.237693	0.0513183	1.05563
	Bare land	0.164577	1.394	5.53621	0.325028	0.29348	0.460413	-0.135445	0.135445	-0.0583359	0.1759	0.0364783	1.05674
	Bare land	0.0843367	1.18421	4.05968	0.277147	0.244475	0.209072	-0.163509	0.163509	-0.0579107	0.227639	-0.053092	0.970536
	Bare land	0.120701	1.27454	6.85393	0.296471	0.254939	0.322625	-0.138499	0.138499	-0.0760247	0.184796	0.0450503	1.06526
	Bare land	0.120026	1.27279	3.96746	0.281933	0.251517	0.341942	-0.135585	0.135585	-0.0451905	0.175955	-0.0319176	0.94864
	Bare land	0.121197	1.27582	5.09346	0.289991	0.252393	0.334186	-0.135335	0.135335	-0.0628178	0.177517	0.026418	1.04589
	Bare land	0.114039	1.25743	3.71374	0.291753	0.25504	0.298506	-0.145226	0.145226	-0.0638797	0.205133	0.0192838	1.02741
	Bare land	0.142981	1.33367	4.77315	0.305108	0.271162	0.401464	-0.133352	0.133352	-0.058727	0.187958	0.0352495	1.03381
	Bare land	0.166744	1.40022	4.09845	0.326346	0.293675	0.462356	-0.133466	0.133466	-0.0533678	0.1804	0.0480751	1.06126
	Bare land	0.148494	1.34878	4.87949	0.316423	0.284383	0.402298	-0.141881	0.141881	-0.0586885	0.19292	0.031608	1.04965
	Bare land	0.122643	1.27957	4.83707	0.326141	0.294969	0.284017	-0.178794	0.178794	-0.0571861	0.243603	-0.0459108	0.964324
	Bare land	0.170793	1.41194	4.71822	0.347769	0.306467	0.433698	-0.143167	0.143167	-0.0602927	0.191522	0.04594	0.991611
	Bare land	0.134326	1.31034	4.04086	0.29503	0.263747	0.380807	-0.134175	0.134175	-0.0532753	0.173836	-0.020766	0.957206
	Bare land	0.197166	1.49117	4.78891	0.354412	0.326944	0.542633	-0.138721	0.138721	-0.0456676	0.193076	0.0479523	1.06645
	Bare land	0.116739	1.26434	4.30363	0.29688	0.255076	0.30249	-0.142582	0.142582	-0.0679747	0.199386	0.0404853	1.05419
	Bare land	0.15862	1.37705	4.94084	0.306792	0.270692	0.477325	-0.1171	0.1171	-0.059144	0.133665	0.0397769	1.05524
	Bare land	0.128124	1.2939	3.18084	0.289528	0.266792	0.360234	-0.143576	0.143576	-0.0435948	0.182858	-0.0269516	1.01991
	Bare land	0.125802	1.28781	5.91651	0.285677	0.240943	0.365217	-0.11874	0.11874	-0.0722602	0.171897	0.0957511	1.07518
	Bare land	0.146336	1.34284	6.28916	0.305152	0.263736	0.421075	-0.122113	0.122113	-0.0673186	0.194396	0.103799	1.06761
	Bare land	0.118917	1.26993	4.94292	0.25668	0.216563	0.399108	-0.100227	0.100227	-0.0638601	0.148156	0.0914259	1.0567
	Bare land	0.123334	1.28137	4.36764	0.263792	0.216994	0.402551	-0.0962355	0.0962355	-0.0642212	0.128495	0.0970922	1.0695
	Bare land	0.194092	1.48167	6.72877	0.340042	0.300322	0.578815	-0.112805	0.112805	-0.0599189	0.155097	0.117773	1.10833
	Bare land	0.0958202	1.21195	4.82475	0.278142	0.236413	0.249667	-0.143851	0.143851	-0.065131	0.195526	0.00699339	1.03228
	Bare land	0.219507	1.56248	6.3335	0.3607	0.322372	0.65542	-0.110699	0.110699	-0.0554406	0.160815	0.143254	1.11564
	Bare land	0.169348	1.40775	6.61801	0.324055	0.283414	0.490241	-0.119816	0.119816	-0.0652916	0.168824	0.119277	1.10635
	Bare land	0.14795	1.34728	4.73217	0.291208	0.253233	0.46332	-0.109381	0.109381	-0.0622018	0.106824	0.0862713	1.06836
	Bare land	0.120884	1.27501	3.25829	0.261304	0.227672	0.390869	-0.10981	0.10981	-0.0522882	0.128927	0.021054	1.0456
	Bare land	0.14668	1.34379	3.74373	0.29426	0.27332	0.443021	-0.131929	0.131929	-0.0298204	0.165495	-0.0307319	0.998135
	Bare land	0.0921207	1.20294	3.29182	0.307574	0.264153	0.203999	-0.176323	0.176323	-0.0786039	0.212747	-0.0426627	0.944614
	Bare land	0.116806	1.26451	3.01367	0.260032	0.233869	0.370915	-0.120352	0.120352	-0.0479086	0.132297	-0.0266232	0.990636
	Bare land	0.0904749	1.19895	2.60172	0.258271	0.234748	0.251871	-0.147404	0.147404	-0.0462852	0.201308	-0.035864	0.996611
	Bare land	0.0921441	1.20299	3.15538	0.256575	0.231063	0.263027	-0.141941	0.141941	-0.0440559	0.192477	-0.0631397	0.957432
	Bare land	0.123652	1.2822	4.75378	0.286978	0.259478	0.35034	-0.140328	0.140328	-0.0507966	0.181914	-0.0131111	1.01356
	Bare land	0.0818441	1.17828	4.79964	0.264779	0.220078	0.214445	-0.140769	0.140769	-0.0667781	0.195895	0.0347747	1.03915
	Bare land	0.104137	1.23249	4.34726	0.273215	0.248054	0.289239	-0.147732	0.147732	-0.0479262	0.189217	-0.021175	1.00564
	Bare land	0.215393	1.54905	5.56819	0.369209	0.336044	0.598	-0.130066	0.130066	-0.0517944	0.151448	0.0539356	1.07087
	Bare land	0.166512	1.39955	4.62024	0.335817	0.300777	0.440624	-0.141344	0.141344	-0.0618415	0.19627	0.0521456	1.05633
	Bare land	0.111601	1.25124	6.01577	0.293347	0.25684	0.290029	-0.149525	0.149525	-0.0666068	0.173886	-0.0154191	0.995219
	Bare land	0.1223	1.27868	5.83943	0.329919	0.290839	0.279305	-0.174755	0.174755	-0.0656578	0.208619	-0.0337719	0.948399
	Bare land	0.103192	1.23013	4.91062	0.28316	0.243156	0.271014	-0.143566	0.143566	-0.0714228	0.193831	0.0241985	1.03173
	Bare land	0.095396	1.21091	3.09122	0.248552	0.223098	0.290804	-0.130479	0.130479	-0.0450296	0.17979	-0.0481201	0.970499
	Bare land	0.12769	1.29276	4.10137	0.342354	0.297016	0.279993	-0.176001	0.176001	-0.0851531	0.23557	0.0342407	1.04942
	Bare land	0.136567	1.31634	3.45903	0.318304	0.291119	0.34344	-0.16095	0.16095	-0.0585647	0.221381	-0.0436936	0.992759
	Bare land	0.153835	1.3636	6.60191	0.344817	0.317829	0.373132	-0.172425	0.172425	-0.0503127	0.230335	-0.0107154	1.00857
	Bare land	0.145219	1.33978	4.10857	0.313064	0.277446	0.392241	-0.137779	0.137779	-0.0655285	0.189123	0.0407904	1.05247
	Bare land	0.123566	1.28197	4.42776	0.289379	0.248757	0.344441	-0.129161	0.129161	-0.0709242	0.155079	0.0221061	1.04219
	Bare land	0.22036	1.56529	5.74365	0.379887	0.343058	0.591808	-0.132732	0.132732	-0.0678683	0.147439	0.0821045	1.08537
	Bare land	0.142795	1.33316	3.29005	0.313614	0.273847	0.376894	-0.136385	0.136385	-0.0706034	0.185325	0.051932	1.05073
	Bare land	0.115672	1.2616	2.69768	0.266894	0.243066	0.347278	-0.13108	0.13108	-0.0485942	0.178364	-0.0392532	0.994383
	Bare land	0.197226	1.49136	5.90528	0.35883	0.319612	0.534838	-0.130619	0.130619	-0.0641928	0.15196	0.0736759	1.09363
	Bare land	0.147249	1.34535	4.07238	0.334183	0.293727	0.360533	-0.1531	0.1531	-0.0745339	0.210649	0.047181	1.06844
	Bare land	0.155099	1.36714	4.43591	0.311613	0.292278	0.443746	-0.143692	0.143692	-0.0389727	0.188554	-0.0366969	0.976141
	Bare land	0.185501	1.4555	5.5464	0.364371	0.343456	0.464413	-0.168704	0.168704	-0.0419797	0.220398	-0.0317811	0.986733
	Bare land	0.181101	1.4423	6.09935	0.342901	0.325802	0.497688	-0.153774	0.153774	-0.031577	0.210154	-0.0382056	0.968787
	Bare land	0.0921353	1.20297	5.44828	0.273529	0.227755	0.242376	-0.138527	0.138527	-0.0778214	0.175393	0.0243943	1.01395
	Bare land	0.167224	1.40161	5.39997	0.321685	0.300252	0.482468	-0.14006	0.14006	-0.0466894	0.199512	0.0113989	1.045
	Bare land	0.129457	1.29742	4.90451	0.307218	0.27946	0.337795	-0.155634	0.155634	-0.0540091	0.215668	-0.00707372	1.02032
	Bare land	0.110012	1.24722	3.83698	0.289571	0.26682	0.286347	-0.16155	0.16155	-0.0459421	0.214518	-0.0577919	0.987566
	Bare land	0.111191	1.2502	3.47966	0.281228	0.254214	0.30337	-0.147184	0.147184	-0.048458	0.202913	-0.0455479	0.923876
	Bare land	0.162003	1.38664	5.27122	0.324839	0.290577	0.447492	-0.134925	0.134925	-0.0557511	0.166327	0.0172565	1.01261
	Bare land	0.178337	1.43409	5.65224	0.334834	0.306117	0.504471	-0.135159	0.135159	-0.0400624	0.160617	-0.0121376	0.961499
	Bare land	0.161582	1.38544	5.69457	0.336695	0.313914	0.419526	-0.160471	0.160471	-0.0460498	0.214324	-0.015505	1.04105
	Bare land	0.170382	1.41075	4.4904	0.30854	0.28851	0.537291	-0.124235	0.124235	-0.0354923	0.178636	0.0276567	1.04973
	Bare land	0.148711	1.34938	6.5677	0.331939	0.290994	0.375434	-0.148718	0.148718	-0.0696799	0.183891	0.0309741	1.05729
	Bare land	0.0916907	1.20189	3.61915	0.280192	0.245325	0.230545	-0.15717	0.15717	-0.0605389	0.207888	-0.0564008	0.933205
	Bare land	0.181657	1.44396	7.40069	0.350259	0.295542	0.484103	-0.120346	0.120346	-0.0815397	0.14947	0.125592	1.09878
	Bare land	0.0808369	1.17589	3.04867	0.274634	0.240357	0.198543	-0.162681	0.162681	-0.0603764	0.203518	-0.0415285	0.998819
	Bare land	0.10292	1.22946	3.21756	0.282002	0.253648	0.268494	-0.154768	0.154768	-0.0503193	0.214624	-0.0593047	0.950622
	Bare land	0.126117	1.28863	3.69561	0.272476	0.235748	0.391949	-0.112991	0.112991	-0.0620735	0.128318	0.0384801	1.05053
	Bare land	0.130771	1.30089	4.30492	0.302409	0.269291	0.350694	-0.143577	0.143577	-0.0641391	0.199906	0.0191848	1.04844
	Bare land	0.0610127	1.12995	2.60314	0.28282	0.239622	0.133041	-0.18126	0.18126	-0.0859658	0.236927	-0.0629831	0.975969
	Bare land	0.106445	1.23825	4.591	0.27877	0.243388	0.29022	-0.140585	0.140585	-0.0630367	0.179271	-0.00476876	1.01977
	Bare land	0.0841451	1.18375	3.19088	0.283163	0.245411	0.201343	-0.164667	0.164667	-0.0732402	0.21488	-0.0260554	0.989201
	Bare land	0.0804816	1.17505	3.87622	0.276694	0.242192	0.196484	-0.164926	0.164926	-0.0689923	0.214734	-0.053925	0.940356
	Bare land	0.168441	1.40512	5.91298	0.334312	0.305716	0.457036	-0.144728	0.144728	-0.0533243	0.187169	0.00232188	1.01671
	Bare land	0.0788252	1.17114	3.14279	0.261432	0.217478	0.205419	-0.141071	0.141071	-0.0739778	0.18095	0.00371115	1.02762
	Bare land	0.093177	1.2055	4.38827	0.292501	0.256365	0.223056	-0.167182	0.167182	-0.0678084	0.22483	-0.0250986	0.965376
	Bare land	0.159425	1.37932	4.83261	0.33705	0.283976	0.407266	-0.130457	0.130457	-0.0760084	0.188135	0.0973466	1.07639
	Bare land	0.112498	1.25352	3.2756	0.292894	0.263535	0.289518	-0.155651	0.155651	-0.0518281	0.197276	-0.0405362	1.00141
	Bare land	0.109083	1.24488	4.26625	0.299389	0.260394	0.269911	-0.155735	0.155735	-0.0700445	0.207405	-4.69528e-05	1.02701
	Bare land	0.165943	1.39792	6.68382	0.363709	0.323219	0.387752	-0.166189	0.166189	-0.0705949	0.215671	0.0362516	1.05583
	Bare land	0.111496	1.25097	3.61821	0.270655	0.247046	0.32426	-0.13939	0.13939	-0.0383511	0.189099	-0.0593142	0.956657
	Bare land	0.0752065	1.16264	3.31086	0.24771	0.218949	0.208064	-0.146149	0.146149	-0.0579111	0.174668	-0.0397769	0.988249
	Bare land	0.119966	1.27264	4.08082	0.303108	0.261658	0.304969	-0.146284	0.146284	-0.0634148	0.19682	0.040986	1.04447
	Bare land	0.133549	1.30827	3.9829	0.283229	0.252082	0.404549	-0.122663	0.122663	-0.0435381	0.179962	0.0288905	1.00949
	Bare land	0.12113	1.27565	5.40347	0.305787	0.270547	0.307612	-0.15448	0.15448	-0.0672507	0.193488	0.004057	1.02322
	Bare land	0.179153	1.43651	6.80212	0.354374	0.313624	0.461458	-0.142476	0.142476	-0.0768258	0.14538	0.054991	1.06878
	Bare land	0.152476	1.35981	4.89486	0.349421	0.316692	0.357469	-0.172548	0.172548	-0.0596072	0.207681	-0.0102239	1.0216
	Bare land	0.283573	1.79163	7.3198	0.45078	0.410149	0.703581	-0.143236	0.143236	-0.065821	0.193861	0.142794	1.14632
	Bare land	0.176877	1.42977	7.74897	0.359985	0.322244	0.440555	-0.154153	0.154153	-0.0694191	0.20385	0.0560944	1.07515
	Bare land	0.141357	1.32926	5.69622	0.346265	0.308437	0.323308	-0.174697	0.174697	-0.0693419	0.215485	0.0045761	1.01906
	Bare land	0.198875	1.49649	5.83985	0.364738	0.332841	0.526594	-0.143462	0.143462	-0.0528598	0.193894	0.0613484	1.08415
	Bare land	0.121886	1.27761	3.78508	0.307563	0.278285	0.304845	-0.16189	0.16189	-0.0631402	0.224456	-0.0472535	0.991302
	Bare land	0.228009	1.5907	7.10047	0.418086	0.377918	0.531534	-0.164045	0.164045	-0.0722874	0.157638	0.0535136	1.07321
	Bare land	0.162463	1.38795	6.02938	0.336255	0.304896	0.425089	-0.149856	0.149856	-0.0631392	0.22019	0.0354314	1.06206
	Bare land	0.131649	1.30322	5.23785	0.334144	0.304746	0.3053	-0.180331	0.180331	-0.0606162	0.24951	-0.0413141	1.0088
	Bare land	0.142976	1.33366	4.89275	0.342511	0.31495	0.33323	-0.180083	0.180083	-0.0648468	0.249552	-0.0384708	1.0085
	Bare land	0.18405	1.45113	5.52579	0.35449	0.335298	0.48074	-0.161196	0.161196	-0.0458709	0.22645	-0.011214	1.02148
	Bare land	0.173597	1.42013	4.93858	0.336268	0.302441	0.474225	-0.135983	0.135983	-0.0618906	0.187585	0.0613069	1.06229
	Bare land	0.224627	1.57941	8.80686	0.404113	0.359825	0.553269	-0.147086	0.147086	-0.0718616	0.205755	0.120457	1.11347
	Bare land	0.149045	1.3503	4.39765	0.290069	0.26451	0.471624	-0.120204	0.120204	-0.0486492	0.173621	0.0366081	1.04635
	Bare land	0.202282	1.50715	9.45433	0.38989	0.34222	0.48785	-0.150346	0.150346	-0.081171	0.196219	0.083559	1.0937
	Bare land	0.180193	1.4396	7.63492	0.35482	0.312058	0.466559	-0.139721	0.139721	-0.0692235	0.197086	0.0542549	1.05347
	Bare land	0.197502	1.49222	7.59609	0.36669	0.328085	0.519015	-0.13963	0.13963	-0.0553047	0.191121	0.0342094	0.985793
	Bare land	0.153924	1.36385	7.85945	0.357	0.313359	0.354869	-0.167515	0.167515	-0.0780851	0.227469	0.00730117	0.997148
	Bare land	0.177082	1.43038	5.85002	0.350454	0.307233	0.45901	-0.137639	0.137639	-0.0691357	0.20355	0.0871628	1.08286
	Bare land	0.199778	1.49931	7.30903	0.391164	0.349376	0.471689	-0.160823	0.160823	-0.0690441	0.242912	0.0833633	1.08613
	Bare land	0.165339	1.39618	4.57158	0.305041	0.279241	0.519474	-0.119415	0.119415	-0.0401789	0.195117	0.0224988	1.01741
	Bare land	0.114216	1.25789	6.57823	0.302958	0.258192	0.286526	-0.148351	0.148351	-0.0784024	0.203221	0.0434381	1.02883
	Bare land	0.22974	1.59653	7.36946	0.411233	0.372284	0.556061	-0.155875	0.155875	-0.0617929	0.208141	0.0707317	1.07948
	Bare land	0.18949	1.46758	8.0004	0.380135	0.340605	0.452649	-0.161541	0.161541	-0.0606504	0.22827	0.0231534	0.993078
	Bare land	0.152125	1.35884	6.1286	0.32612	0.290924	0.40074	-0.145226	0.145226	-0.0574258	0.192859	0.0244846	1.04145
	Bare land	0.179782	1.43838	7.94809	0.361528	0.322664	0.450131	-0.15168	0.15168	-0.0628728	0.222901	0.0278009	1.02505
	Bare land	0.162219	1.38726	9.2313	0.37691	0.328675	0.355819	-0.17583	0.17583	-0.0752982	0.235731	0.0309668	1.0008
	Bare land	0.151995	1.35848	6.8697	0.358078	0.310213	0.345377	-0.166047	0.166047	-0.0710278	0.234549	0.0274954	0.986125
	Bare land	0.200492	1.50154	8.64316	0.437874	0.388525	0.397168	-0.203918	0.203918	-0.0804293	0.273662	0.0396511	1.02242
	Bare land	0.141434	1.32947	5.78648	0.314147	0.262084	0.377389	-0.125294	0.125294	-0.0747077	0.162687	0.0803185	1.08989
	Bare land	0.125061	1.28587	6.17791	0.315622	0.275297	0.30867	-0.155592	0.155592	-0.0650515	0.215342	0.0176496	1.04451
	Bare land	0.196652	1.48958	5.42703	0.342371	0.304978	0.580985	-0.115237	0.115237	-0.0569311	0.177446	0.101727	1.08812
	Bare land	0.155528	1.36834	6.42734	0.346813	0.297097	0.376102	-0.148428	0.148428	-0.0776226	0.188221	0.0626547	1.04529
	Bare land	0.176135	1.42758	6.77586	0.359283	0.308422	0.437407	-0.139886	0.139886	-0.0811364	0.199442	0.109492	1.09445
	Bare land	0.101339	1.22553	5.24848	0.289601	0.248154	0.255683	-0.150603	0.150603	-0.0660564	0.191237	-0.00309146	1.0168
	Bare land	0.133516	1.30818	5.47972	0.316282	0.276916	0.339687	-0.148905	0.148905	-0.0642998	0.186399	0.0216299	1.03061
	Bare land	0.101868	1.22684	3.61745	0.269645	0.244923	0.284045	-0.146716	0.146716	-0.0398709	0.190582	-0.0315743	0.985708
	Bare land	0.179413	1.43728	6.1081	0.382081	0.342462	0.406487	-0.173723	0.173723	-0.0629916	0.213112	0.0134101	1.02365
	Bare land	0.151759	1.35782	5.85175	0.359779	0.319139	0.340884	-0.175899	0.175899	-0.0661403	0.217155	0.00136568	1.01477
	Bare land	0.103261	1.2303	4.67184	0.303244	0.262427	0.245378	-0.163599	0.163599	-0.0692018	0.206887	-0.0162214	0.998298
	Bare land	0.0733203	1.15824	3.23885	0.283157	0.243525	0.168046	-0.173299	0.173299	-0.0635238	0.218214	-0.0505423	0.9849
	Bare land	0.0902447	1.19839	4.76801	0.33242	0.285267	0.181228	-0.200176	0.200176	-0.0845087	0.248949	-0.0506152	0.966745
	Bare land	0.147835	1.34696	4.84578	0.322482	0.291321	0.386697	-0.149944	0.149944	-0.0540191	0.191089	-0.0210043	1.00459
	Bare land	0.102676	1.22885	5.28006	0.334375	0.289617	0.213894	-0.192671	0.192671	-0.0789356	0.236266	-0.0401332	0.988269
	Bare land	0.0939057	1.20728	3.76919	0.267251	0.238512	0.255676	-0.147919	0.147919	-0.0471816	0.196998	-0.0616512	0.956876
	Bare land	0.125188	1.28621	5.09926	0.283224	0.249777	0.366175	-0.128611	0.128611	-0.050722	0.16602	0.0206127	1.02749
	Bare land	0.118526	1.26893	5.31242	0.317535	0.275679	0.281314	-0.162462	0.162462	-0.071665	0.222756	0.0177399	1.02972
	Bare land	0.088355	1.19384	4.51479	0.265404	0.233802	0.237673	-0.148515	0.148515	-0.0464477	0.196764	-0.0588577	0.92614
	Bare land	0.132869	1.30646	5.88046	0.333226	0.295467	0.311673	-0.169241	0.169241	-0.0672677	0.250638	0.0279179	1.02118
	Bare land	0.123784	1.28254	5.94504	0.338584	0.30068	0.274088	-0.183734	0.183734	-0.0698996	0.231305	-0.0307986	1.00651
	Bare land	0.122473	1.27913	5.01966	0.31043	0.257974	0.305196	-0.139922	0.139922	-0.0844995	0.19301	0.0855803	1.08216
	Bare land	0.0863128	1.18893	4.96131	0.271596	0.225656	0.222891	-0.142112	0.142112	-0.0727857	0.17432	0.00692566	1.0225
	Bare land	0.130585	1.3004	5.12479	0.29652	0.260008	0.363301	-0.133972	0.133972	-0.0619306	0.171484	0.0284263	1.03821
	Bare land	0.143905	1.33619	5.55993	0.304844	0.272727	0.408445	-0.134084	0.134084	-0.0491376	0.175322	0.0134212	1.01823
	Bare land	0.0863692	1.18907	3.97869	0.32544	0.281277	0.175198	-0.19976	0.19976	-0.0812913	0.262985	-0.0364077	0.964398
	Bare land	0.219236	1.56159	4.95421	0.409004	0.373878	0.508237	-0.168449	0.168449	-0.0569441	0.220275	0.0658987	1.09026
	Bare land	0.220312	1.56513	4.49423	0.398139	0.365358	0.535611	-0.157743	0.157743	-0.0477395	0.195279	0.0382582	1.05405
	Bare land	0.228674	1.59294	6.50079	0.42098	0.385779	0.526403	-0.172305	0.172305	-0.0623768	0.235056	0.0553168	1.06303
	Bare land	0.0949236	1.20976	3.04666	0.287273	0.251904	0.232544	-0.160826	0.160826	-0.0626906	0.186916	-0.0388725	0.987781
	Bare land	0.110179	1.24764	3.26146	0.284189	0.250634	0.293724	-0.144444	0.144444	-0.0602603	0.192109	0.00618955	1.03107
	Bare land	0.134357	1.31042	4.65128	0.346929	0.313496	0.297123	-0.187016	0.187016	-0.0612392	0.231223	-0.0300477	0.985075
	Bare land	0.160099	1.38123	5.72342	0.371	0.332687	0.35363	-0.182298	0.182298	-0.065104	0.222799	0.00503221	1.02894
	Bare land	0.154826	1.36638	4.22572	0.353124	0.318537	0.358632	-0.172204	0.172204	-0.0718166	0.250435	0.048936	1.03291
	Bare land	0.158887	1.3778	5.38573	0.365327	0.327058	0.35717	-0.177389	0.177389	-0.0693967	0.233647	0.0383174	1.04394
	Bare land	0.149823	1.35245	5.12222	0.315365	0.284015	0.411411	-0.140156	0.140156	-0.0550502	0.193043	0.0299028	1.04633
	Bare land	0.104663	1.2338	3.79049	0.260063	0.242825	0.313966	-0.141765	0.141765	-0.036751	0.194144	-0.0622204	0.985466
	Bare land	0.151428	1.3569	4.34486	0.311367	0.285052	0.425903	-0.139652	0.139652	-0.0513464	0.205834	0.0333274	1.05382
	Bare land	0.104269	1.23281	3.34303	0.282704	0.253128	0.273001	-0.152894	0.152894	-0.0590247	0.19302	-0.0475947	1.00389
	Bare land	0.166205	1.39867	5.90892	0.368802	0.329769	0.379128	-0.173049	0.173049	-0.0698206	0.230825	0.0286955	1.03941
	Bare land	0.110376	1.24814	4.21471	0.275045	0.25331	0.312585	-0.147046	0.147046	-0.0370685	0.199046	-0.0343176	0.98525
	Bare land	0.117686	1.26677	3.04345	0.285541	0.260686	0.321523	-0.147527	0.147527	-0.0436848	0.208251	-0.0438245	0.952732
	Bare land	0.139493	1.32421	4.02878	0.303928	0.282397	0.385425	-0.148765	0.148765	-0.0353764	0.211306	-0.0425528	0.944419
	Bare land	0.183476	1.44941	6.21887	0.343059	0.310087	0.509655	-0.134249	0.134249	-0.0572756	0.16545	0.0490274	1.07716
	Bare land	0.120578	1.27422	4.04633	0.309062	0.265962	0.298343	-0.1502	0.1502	-0.0734556	0.20438	0.0363937	1.05734
	Bare land	0.154425	1.36525	3.8673	0.286931	0.267148	0.511215	-0.117573	0.117573	-0.0399844	0.177831	0.0300493	1.05646
	Bare land	0.119086	1.27037	3.47149	0.314744	0.286433	0.283728	-0.173257	0.173257	-0.0545706	0.231043	-0.0395143	1.00937
	Bare land	0.166	1.39808	4.40024	0.318564	0.293596	0.480873	-0.134134	0.134134	-0.049132	0.189809	0.0297807	1.05007
June	Seriphidium transiliense	0.321913	1.94948	21.5642	0.459329	0.321913	0.921285	-0.417877	0.110879	-0.0647627	0.152925	0.157031	1.16051
	Seriphidium transiliense	0.265761	1.72391	15.0358	0.464859	0.265761	0.593618	-0.424331	0.178725	-0.0696225	0.270253	0.0423584	1.01075
	Seriphidium transiliense	0.367688	2.16299	13.6599	0.443881	0.367688	1.45377	-0.398074	0.035596	-0.0444014	0.0385626	0.197592	1.14169
	Seriphidium transiliense	0.292954	1.82867	8.71673	0.372745	0.292954	1.25037	-0.337116	0.0490007	-0.0510498	0.0759232	0.161216	1.18335
	Seriphidium transiliense	0.351526	2.08416	12.5067	0.456415	0.351526	1.15991	-0.415424	0.0748255	-0.0493123	0.0915245	0.154765	1.0945
	Seriphidium transiliense	0.270147	1.74028	14.4146	0.319474	0.270147	1.74601	-0.294667	0.0266405	-0.0281026	0.0240902	0.117389	1.08328
	Seriphidium transiliense	0.296	1.84091	11.8935	0.381811	0.296	1.21184	-0.357384	0.0686455	-0.0326449	0.0774333	0.120475	1.08391
	Seriphidium transiliense	0.304075	1.87387	6.56213	0.453088	0.304075	0.803963	-0.420338	0.1333	-0.0529699	0.198242	0.102123	1.11803
	Seriphidium transiliense	0.301027	1.86134	8.53011	0.435653	0.301027	0.870146	-0.397155	0.109181	-0.0580229	0.139649	0.131114	1.13794
	Seriphidium transiliense	0.231599	1.60281	8.69309	0.387644	0.231599	0.636581	-0.354065	0.133406	-0.047438	0.158424	0.0701297	1.0784
	Seriphidium transiliense	0.360908	2.12944	13.4566	0.513015	0.360908	0.918856	-0.450848	0.107419	-0.0872714	0.108885	0.161209	1.15241
	Seriphidium transiliense	0.240875	1.63461	10.0068	0.321322	0.240875	1.13238	-0.28566	0.0480939	-0.039296	0.0548442	0.10864	1.12127
	Seriphidium transiliense	0.305526	1.87988	10.02	0.371771	0.305526	1.45603	-0.338012	0.0362267	-0.032207	0.0382794	0.160049	1.10628
	Seriphidium transiliense	0.287408	1.80665	7.82165	0.357863	0.287408	1.34263	-0.332091	0.0493983	-0.0253814	0.0506103	0.130866	1.08057
	Seriphidium transiliense	0.382807	2.24048	18.9373	0.483065	0.382807	1.26634	-0.437466	0.0656532	-0.0561569	0.0700433	0.200273	1.16736
	Seriphidium transiliense	0.227485	1.58895	8.29767	0.352989	0.227485	0.750797	-0.323565	0.103714	-0.039934	0.164772	0.0350179	1.027
	Seriphidium transiliense	0.323838	1.95787	11.7704	0.417834	0.323838	1.19141	-0.379431	0.0633809	-0.0302662	0.0803253	0.143275	1.09103
	Seriphidium transiliense	0.241122	1.63547	10.1382	0.354589	0.241122	0.856958	-0.329243	0.09572	-0.0262983	0.140686	0.041294	1.01417
	Seriphidium transiliense	0.436747	2.5508	10.5987	0.484125	0.436747	1.89375	-0.444397	0.00949142	-0.0291234	0.0205436	0.297775	1.24536
	Seriphidium transiliense	0.28786	1.80844	12.6902	0.467229	0.28786	0.685782	-0.429982	0.162198	-0.0532944	0.207033	0.0750084	1.07934
	Seriphidium transiliense	0.366392	2.15652	12.3915	0.404468	0.366392	2.07757	-0.359665	-0.00774759	-0.0408977	0.00384273	0.258624	1.19002
	Seriphidium transiliense	0.359184	2.12102	13.6416	0.401778	0.359184	1.98137	-0.35233	-0.007847	-0.0344491	0.00782605	0.256897	1.19514
	Seriphidium transiliense	0.425087	2.47879	11.3906	0.517222	0.425087	1.3728	-0.474592	0.0620157	-0.0455144	0.0758343	0.254496	1.18294
	Seriphidium transiliense	0.339136	2.02634	12.4327	0.422115	0.339136	1.32721	-0.383976	0.0515529	-0.0260132	0.0874969	0.190891	1.11093
	Seriphidium transiliense	0.329934	1.98478	10.4301	0.425112	0.329934	1.18691	-0.392279	0.0716137	-0.0373238	0.105995	0.174884	1.10697
	Seriphidium transiliense	0.347962	2.06731	14.4515	0.448066	0.347962	1.19575	-0.400789	0.0613882	-0.0549588	0.0952215	0.223173	1.17884
	Seriphidium transiliense	0.346162	2.05886	10.2899	0.487276	0.346162	0.932599	-0.439247	0.109777	-0.0644952	0.142762	0.200398	1.14592
	Seriphidium transiliense	0.184841	1.45351	5.95004	0.280247	0.184841	0.809243	-0.264464	0.0837151	-0.0244787	0.115617	0.0552906	1.07351
	Seriphidium transiliense	0.230785	1.60005	5.4571	0.292734	0.230785	1.31075	-0.257325	0.0282155	-0.0344079	0.0451156	0.103538	1.0818
	Seriphidium transiliense	0.333796	2.00208	9.38938	0.441814	0.333796	1.09129	-0.399068	0.0753037	-0.0406679	0.113493	0.175132	1.09413
	Seriphidium transiliense	0.259174	1.69969	15.8525	0.364217	0.259174	0.970239	-0.318438	0.0645954	-0.0445254	0.0991372	0.1032	1.05698
	Seriphidium transiliense	0.341224	2.03593	13.4441	0.44426	0.341224	1.15752	-0.399125	0.06703	-0.0485829	0.0948871	0.219595	1.16936
	Seriphidium transiliense	0.211757	1.53729	4.77554	0.372123	0.211757	0.565833	-0.340315	0.138543	-0.0391039	0.229837	0.00790206	0.974643
	Seriphidium transiliense	0.24822	1.66035	3.97677	0.444425	0.24822	0.543644	-0.420552	0.192419	-0.0391738	0.320765	-0.0065025	0.969954
	Seriphidium transiliense	0.293849	1.83226	11.3364	0.375695	0.293849	1.2463	-0.331321	0.0415133	-0.0457785	0.0449679	0.121994	1.05061
	Seriphidium transiliense	0.289811	1.81615	11.6147	0.375747	0.289811	1.19617	-0.337637	0.0530137	-0.0402245	0.0616315	0.117085	1.06261
	Seriphidium transiliense	0.347222	2.06383	13.1465	0.393458	0.347222	1.88997	-0.352644	0.00617867	-0.0353366	0.0190784	0.220628	1.24353
	Seriphidium transiliense	0.410823	2.39457	14.8026	0.436325	0.410823	2.41977	-0.400245	-0.0126596	-0.0161956	-0.0111641	0.269107	1.29493
	Seriphidium transiliense	0.215991	1.55099	11.1338	0.310024	0.215991	0.93464	-0.266407	0.0534946	-0.0423716	0.080154	0.0940175	1.06272
	Seriphidium transiliense	0.267052	1.72871	12.9325	0.411214	0.267052	0.766838	-0.380565	0.126355	-0.0460387	0.180529	0.0405462	1.00313
	Seriphidium transiliense	0.336914	2.0162	22.2179	0.451207	0.336914	1.08405	-0.393031	0.0646814	-0.0696887	0.0787396	0.20007	1.18777
	Seriphidium transiliense	0.275376	1.76005	21.7069	0.403745	0.275376	0.868403	-0.351486	0.0842665	-0.0500478	0.12326	0.108001	1.07255
	Seriphidium transiliense	0.309418	1.89611	16.1426	0.437188	0.309418	0.940237	-0.388628	0.0900364	-0.0537039	0.105833	0.128382	1.10406
	Seriphidium transiliense	0.237599	1.62329	11.4349	0.356103	0.237599	0.821375	-0.312289	0.0806769	-0.0442295	0.0978183	0.11508	1.11871
	Seriphidium transiliense	0.381459	2.23342	16.4185	0.474435	0.381459	1.31902	-0.430796	0.0590391	-0.0427853	0.0600605	0.217252	1.17971
	Seriphidium transiliense	0.25625	1.68908	21.599	0.391104	0.25625	0.791648	-0.358523	0.11262	-0.0449524	0.153492	0.0697976	1.0309
	Seriphidium transiliense	0.327281	1.97301	18.1562	0.441879	0.327281	1.05819	-0.395311	0.0781396	-0.0713705	0.110661	0.18877	1.1844
	Seriphidium transiliense	0.20713	1.52248	8.4932	0.269433	0.20713	1.29006	-0.234863	0.0291514	-0.0373614	0.0521875	0.144873	1.05764
	Seriphidium transiliense	0.261828	1.7094	11.6573	0.367517	0.261828	0.963479	-0.332428	0.0773309	-0.0389074	0.0958839	0.140138	1.09699
	Seriphidium transiliense	0.325169	1.9637	24.5126	0.387443	0.325169	1.60544	-0.345745	0.0231822	-0.0416526	0.0565932	0.224972	1.19819
	Seriphidium transiliense	0.306276	1.88299	15.14	0.426851	0.306276	0.9731	-0.377332	0.080341	-0.0536431	0.126168	0.159988	1.10207
	Seriphidium transiliense	0.319452	1.93881	16.9965	0.412432	0.319452	1.2067	-0.365204	0.0517947	-0.0495098	0.0840693	0.207634	1.15088
	Seriphidium transiliense	0.331476	1.99167	16.6356	0.474002	0.331476	0.911183	-0.430316	0.115284	-0.0599641	0.170403	0.169721	1.1827
	Seriphidium transiliense	0.247347	1.65727	18.5454	0.306654	0.247347	1.49748	-0.27191	0.0263348	-0.0184592	0.063498	0.163642	1.1052
	Seriphidium transiliense	0.239608	1.63022	15.5464	0.353351	0.239608	0.861568	-0.313131	0.0794869	-0.059721	0.111155	0.107336	1.11621
	Seriphidium transiliense	0.291162	1.82152	13.7411	0.377985	0.291162	1.19781	-0.341164	0.0555162	-0.0505537	0.0731427	0.15169	1.16156
	Seriphidium transiliense	0.193878	1.48101	8.22081	0.304755	0.193878	0.741943	-0.281984	0.0932021	-0.0416264	0.150444	0.0638493	1.07179
	Seriphidium transiliense	0.356318	2.10712	18.4638	0.41698	0.356318	1.66263	-0.363002	0.00767725	-0.052537	0.0384845	0.275598	1.22721
	Seriphidium transiliense	0.363906	2.14419	14.274	0.433691	0.363906	1.52789	-0.379328	0.0178916	-0.0481333	0.050349	0.240056	1.15324
	Seriphidium transiliense	0.320425	1.94302	17.2638	0.416021	0.320425	1.18602	-0.366947	0.0527206	-0.0479571	0.0558868	0.143179	1.12176
	Seriphidium transiliense	0.271528	1.74547	15.4177	0.399163	0.271528	0.85797	-0.365165	0.103944	-0.0354373	0.139416	0.0764468	1.01865
	Seriphidium transiliense	0.298238	1.84997	20.0781	0.383353	0.298238	1.24449	-0.345434	0.0526174	-0.0243486	0.0813041	0.178196	1.08497
	Seriphidium transiliense	0.247158	1.6566	9.56273	0.40278	0.247158	0.673949	-0.366378	0.13109	-0.0518715	0.212715	0.110342	1.11754
	Seriphidium transiliense	0.314987	1.91965	23.4519	0.372526	0.314987	1.66985	-0.332368	0.0194139	-0.0340934	0.0486623	0.222855	1.18503
	Seriphidium transiliense	0.314197	1.91629	25.9352	0.431176	0.314197	1.02293	-0.399053	0.0970202	-0.0384031	0.116849	0.11429	1.05606
	Seriphidium transiliense	0.29085	1.82028	16.112	0.386417	0.29085	1.12107	-0.352894	0.0691405	-0.0425832	0.0785806	0.112435	1.0736
	Seriphidium transiliense	0.344984	2.05336	14.1486	0.41529	0.344984	1.49167	-0.378115	0.0381006	-0.0397801	0.0379684	0.174521	1.11756
	Seriphidium transiliense	0.275022	1.75871	15.9723	0.385159	0.275022	0.972035	-0.355996	0.0897625	-0.0469204	0.107462	0.107971	1.0917
	Seriphidium transiliense	0.351366	2.0834	21.0959	0.450632	0.351366	1.22157	-0.419554	0.0799785	-0.0378978	0.0592523	0.169979	1.1028
	Seriphidium transiliense	0.37971	2.2243	29.1951	0.476822	0.37971	1.29891	-0.432592	0.0632753	-0.0475568	0.0833928	0.182653	1.17388
	Seriphidium transiliense	0.259259	1.7	19.4409	0.378318	0.259259	0.881525	-0.351634	0.101641	-0.0314158	0.128804	0.0708661	1.03125
	Seriphidium transiliense	0.295689	1.83965	14.85	0.389658	0.295689	1.14311	-0.354863	0.0661112	-0.0419848	0.0822001	0.120806	1.0935
	Seriphidium transiliense	0.324792	1.96205	12.4388	0.419198	0.324792	1.19232	-0.365469	0.0461568	-0.0609177	0.10376	0.206457	1.16681
	Seriphidium transiliense	0.221477	1.56897	16.3556	0.328829	0.221477	0.856732	-0.307179	0.0919577	-0.032081	0.124986	0.05091	1.02058
	Seriphidium transiliense	0.243371	1.6433	10.8615	0.348386	0.243371	0.920838	-0.314457	0.0769768	-0.044841	0.103946	0.0674133	1.00443
	Seriphidium transiliense	0.23963	1.6303	8.12041	0.357201	0.23963	0.822055	-0.318427	0.0853055	-0.0578318	0.124276	0.0811618	1.08688
	Seriphidium transiliense	0.182028	1.44507	6.7542	0.29992	0.182028	0.664651	-0.271486	0.0941087	-0.0319549	0.164222	0.009627	0.976585
	Seriphidium transiliense	0.341143	2.03556	18.3595	0.416438	0.341143	1.43653	-0.378441	0.0428263	-0.0476686	0.0503474	0.180519	1.18764
	Seriphidium transiliense	0.269051	1.73617	15.2465	0.367028	0.269051	1.04852	-0.345373	0.0841403	-0.0366162	0.0981423	0.107399	1.11698
	Seriphidium transiliense	0.272035	1.74739	17.7153	0.357725	0.272035	1.17511	-0.327857	0.0612884	-0.0457607	0.06105	0.116577	1.0959
	Seriphidium transiliense	0.283699	1.79212	12.5129	0.350482	0.283699	1.42367	-0.289963	0.00682526	-0.0504294	0.0516102	0.213219	1.1989
	Seriphidium transiliense	0.359056	2.1204	13.036	0.48192	0.359056	1.05831	-0.422357	0.0746166	-0.0775658	0.128194	0.225653	1.17895
	Seriphidium transiliense	0.334833	2.00676	16.5622	0.447895	0.334833	1.08092	-0.397583	0.0723867	-0.0538735	0.0792968	0.145031	1.11413
	Seriphidium transiliense	0.306155	1.88249	17.3106	0.345248	0.306155	2.078	-0.304979	-0.00129762	-0.0411541	0.0290027	0.218063	1.18483
	Seriphidium transiliense	0.3054	1.87936	17.8047	0.414435	0.3054	1.05012	-0.386835	0.0923448	-0.0273346	0.10865	0.157673	1.05862
	Seriphidium transiliense	0.222379	1.57195	14.8063	0.34765	0.222379	0.751118	-0.312029	0.0963351	-0.0498544	0.126802	0.086562	1.09734
	Seriphidium transiliense	0.229298	1.59504	14.8038	0.338662	0.229298	0.862234	-0.299089	0.0749304	-0.0519854	0.0899423	0.141345	1.14411
	Seriphidium transiliense	0.239361	1.62937	12.9201	0.375443	0.239361	0.738996	-0.336536	0.105688	-0.0468483	0.162404	0.0523522	1.01641
	Seriphidium transiliense	0.249739	1.66574	13.5733	0.315352	0.249739	1.37312	-0.27701	0.0292976	-0.0440254	0.0348807	0.133045	1.12793
	Seriphidium transiliense	0.283503	1.79136	10.1028	0.397975	0.283503	0.949344	-0.360987	0.0863177	-0.0385432	0.133739	0.144748	1.04499
	Seriphidium transiliense	0.324782	1.96201	13.6649	0.415879	0.324782	1.22597	-0.371106	0.0526729	-0.0502341	0.0763403	0.209726	1.15947
	Seriphidium transiliense	0.275877	1.76196	20.1489	0.371968	0.275877	1.08814	-0.320118	0.0485268	-0.0508425	0.0721263	0.149415	1.12909
	Seriphidium transiliense	0.301676	1.864	11.8001	0.431067	0.301676	0.90781	-0.390533	0.100724	-0.0453272	0.168401	0.158758	1.06375
	Seriphidium transiliense	0.293379	1.83037	13.4254	0.416594	0.293379	0.927333	-0.377568	0.0946753	-0.0369911	0.110923	0.128666	1.15605
	Seriphidium transiliense	0.313854	1.91483	9.96566	0.412739	0.313854	1.12288	-0.359661	0.0516356	-0.0541936	0.0736896	0.186858	1.10783
	Seriphidium transiliense	0.327623	1.97452	11.6725	0.426625	0.327623	1.15675	-0.361601	0.0385449	-0.0600879	0.0683415	0.189516	1.0777
	Seriphidium transiliense	0.191442	1.47354	6.76931	0.320471	0.191442	0.637765	-0.298155	0.113172	-0.0275385	0.217354	0.0721528	1.05067
	Seriphidium transiliense	0.166896	1.40066	9.72486	0.23321	0.166896	1.10065	-0.196608	0.0307199	-0.0441403	0.0864833	0.19506	1.17519
	Seriphidium transiliense	0.242689	1.64092	13.374	0.29611	0.242689	1.59401	-0.258696	0.017079	-0.0377426	0.0467077	0.157825	1.09852
	Seriphidium transiliense	0.283621	1.79182	9.37321	0.333486	0.283621	1.70756	-0.298471	0.0162232	-0.0290731	0.0452803	0.164366	1.0911
	Seriphidium transiliense	0.259099	1.69941	10.2419	0.315648	0.259099	1.53664	-0.284761	0.0277062	-0.0191285	0.0528152	0.166981	1.06681
	Seriphidium transiliense	0.24261	1.64065	9.50021	0.301016	0.24261	1.45977	-0.267576	0.0266994	-0.0228293	0.0618636	0.145885	1.04764
	Seriphidium transiliense	0.310753	1.90172	21.0461	0.382294	0.310753	1.43503	-0.325426	0.0163228	-0.0634402	0.0362559	0.207368	1.22106
	Seriphidium transiliense	0.28287	1.7889	22.6039	0.429611	0.28287	0.798229	-0.391132	0.12173	-0.0497739	0.182886	0.0755865	1.06477
	Seriphidium transiliense	0.305774	1.88091	16.9992	0.411352	0.305774	1.07477	-0.357645	0.0582405	-0.0487179	0.110481	0.204226	1.16723
	Seriphidium transiliense	0.257073	1.69206	13.9346	0.345399	0.257073	1.10395	-0.310391	0.0579406	-0.0386278	0.119445	0.137683	1.15129
	Seriphidium transiliense	0.284584	1.79558	14.8346	0.391265	0.284584	1.01636	-0.344239	0.0661331	-0.0476333	0.108968	0.156508	1.08053
	Seriphidium transiliense	0.32934	1.98214	15.7278	0.367527	0.32934	2.10014	-0.323047	-0.00704305	-0.0441656	0.0265138	0.279185	1.25187
	Seriphidium transiliense	0.293932	1.83259	13.8086	0.41433	0.293932	0.945537	-0.378253	0.0948694	-0.0514481	0.146662	0.150537	1.10627
	Seriphidium transiliense	0.330773	1.98852	15.1055	0.409738	0.330773	1.36577	-0.366414	0.0405556	-0.0371196	0.0693238	0.197785	1.0968
	Seriphidium transiliense	0.327826	1.97542	18.237	0.404855	0.327826	1.39149	-0.373383	0.0519111	-0.0318089	0.0709204	0.213685	1.13143
	Seriphidium transiliense	0.316176	1.92473	12.1753	0.426864	0.316176	1.04973	-0.392641	0.0873033	-0.0467839	0.106452	0.192296	1.13207
	Seriphidium transiliense	0.401534	2.34188	22.0348	0.474775	0.401534	1.56211	-0.424633	0.0278481	-0.0367546	0.03726	0.25403	1.28873
	Seriphidium transiliense	0.349497	2.07454	17.2961	0.42221	0.349497	1.47959	-0.372628	0.0265943	-0.0413972	0.0782355	0.222881	1.21286
	Seriphidium transiliense	0.290528	1.819	12.9204	0.412889	0.290528	0.925047	-0.370916	0.0900969	-0.050346	0.116796	0.126132	1.14945
	Seriphidium transiliense	0.234659	1.61321	14.8854	0.320664	0.234659	1.07148	-0.292221	0.0617997	-0.0208246	0.107927	0.0811004	1.04445
	Seriphidium transiliense	0.192651	1.47724	11.4435	0.31145	0.192651	0.701017	-0.289062	0.102096	-0.0197312	0.183642	0.00880643	0.977999
	Seriphidium transiliense	0.351607	2.08455	22.5313	0.41189	0.351607	1.67324	-0.365741	0.0162187	-0.0303547	0.0529219	0.216394	1.17582
	Seriphidium transiliense	0.335054	2.00776	18.5273	0.427667	0.335054	1.24384	-0.377313	0.0483751	-0.0423259	0.0972769	0.213776	1.16402
	Seriphidium transiliense	0.226717	1.58637	11.1771	0.342192	0.226717	0.810927	-0.308231	0.0876389	-0.0435714	0.120624	0.0423845	1.03045
	Seriphidium transiliense	0.302331	1.86669	14.1589	0.409552	0.302331	1.05009	-0.366751	0.0724542	-0.0421472	0.0973569	0.124946	1.07727
	Seriphidium transiliense	0.184907	1.45371	13.0486	0.309703	0.184907	0.651135	-0.268632	0.0881007	-0.0477789	0.152037	0.0594427	1.0625
	Seriphidium transiliense	0.284368	1.79473	12.6232	0.419058	0.284368	0.846483	-0.380252	0.107509	-0.045956	0.150788	0.0965197	1.06372
	Seriphidium transiliense	0.233422	1.609	11.8739	0.358111	0.233422	0.778054	-0.314302	0.0872839	-0.0466619	0.118843	0.0779514	1.06736
	Seriphidium transiliense	0.349697	2.07549	16.1775	0.400497	0.349697	1.81836	-0.345675	-0.00457476	-0.0390472	0.0390377	0.233454	1.21861
	Seriphidium transiliense	0.213157	1.5418	10.0529	0.309722	0.213157	0.902262	-0.27637	0.06717	-0.033695	0.0957174	0.0807249	1.0778
	Seriphidium transiliense	0.203187	1.51	8.71748	0.300669	0.203187	0.861836	-0.269839	0.0705187	-0.0253972	0.124523	0.051162	1.00034
	Seriphidium transiliense	0.267317	1.72969	12.8857	0.351067	0.267317	1.17285	-0.313065	0.0499267	-0.0321281	0.066484	0.123846	1.11638
	Seriphidium transiliense	0.269039	1.73612	11.2037	0.383884	0.269039	0.917948	-0.340585	0.0787627	-0.0472479	0.11944	0.0943278	1.05669
	Seriphidium transiliense	0.222693	1.57299	8.31907	0.345186	0.222693	0.754291	-0.303939	0.0871444	-0.0483954	0.144626	0.0702324	1.03316
	Seriphidium transiliense	0.256857	1.69127	12.247	0.375264	0.256857	0.870377	-0.33408	0.0844712	-0.0435275	0.121812	0.116722	1.11004
	Seriphidium transiliense	0.217252	1.5551	6.3388	0.346158	0.217252	0.701695	-0.314127	0.10397	-0.0331356	0.168817	0.0368953	1.00742
	Seriphidium transiliense	0.23899	1.62809	10.6476	0.32772	0.23899	1.04381	-0.277243	0.0409677	-0.0514196	0.0800754	0.110348	1.09576
	Seriphidium transiliense	0.192009	1.47527	9.13352	0.290925	0.192009	0.819546	-0.23774	0.047919	-0.0659624	0.109398	0.150076	1.13108
	Seriphidium transiliense	0.149517	1.35161	6.96961	0.265468	0.149517	0.579031	-0.239558	0.0933852	-0.0203642	0.171973	0.00798693	0.985085
	Seriphidium transiliense	0.2726	1.74952	12.1462	0.384303	0.2726	0.94865	-0.352669	0.0885857	-0.0426545	0.139207	0.119378	1.13887
	Seriphidium transiliense	0.140192	1.3261	5.70664	0.253789	0.140192	0.556909	-0.220238	0.0825958	-0.0353187	0.143939	0.0240011	1.03467
	Seriphidium transiliense	0.235331	1.61551	12.6168	0.374025	0.235331	0.717591	-0.331673	0.104499	-0.0494137	0.166946	0.0851495	1.07723
	Seriphidium transiliense	0.224214	1.57803	13.5574	0.328789	0.224214	0.879888	-0.291993	0.0725273	-0.040424	0.107287	0.0858762	1.08778
	Seriphidium transiliense	0.269916	1.73941	12.2859	0.386946	0.269916	0.909157	-0.345762	0.0836536	-0.0492396	0.124854	0.104933	1.07968
	Seriphidium transiliense	0.219936	1.56389	10.37	0.364825	0.219936	0.652768	-0.330584	0.119323	-0.0410283	0.196435	0.0423474	1.00121
	Seriphidium transiliense	0.236042	1.61795	7.86479	0.331978	0.236042	0.959127	-0.295254	0.063647	-0.0355706	0.10123	0.0691711	1.01901
	Seriphidium transiliense	0.228854	1.59354	9.79115	0.352128	0.228854	0.769809	-0.312125	0.0896763	-0.0435248	0.147483	0.0639255	1.053
	Seriphidium transiliense	0.220217	1.56482	11.5426	0.334029	0.220217	0.804644	-0.2932	0.0780199	-0.043539	0.126148	0.0744231	1.07904
	Seriphidium transiliense	0.156077	1.36988	5.99802	0.284491	0.156077	0.541245	-0.256305	0.104405	-0.0304582	0.184111	-0.0102103	0.966405
	Seriphidium transiliense	0.251458	1.67186	14.667	0.338367	0.251458	1.10582	-0.311388	0.0650211	-0.0245638	0.088399	0.0866983	1.06753
	Seriphidium transiliense	0.312307	1.90827	20.4994	0.396924	0.312307	1.2801	-0.357618	0.0510084	-0.0459778	0.0544277	0.157605	1.13276
	Seriphidium transiliense	0.270306	1.74087	11.6537	0.362802	0.270306	1.08973	-0.326057	0.0611405	-0.0425779	0.0816191	0.123836	1.13346
	Seriphidium transiliense	0.207435	1.52345	9.73124	0.321865	0.207435	0.762785	-0.294356	0.0925733	-0.0296287	0.147524	0.0287208	0.990167
	Seriphidium transiliense	0.168706	1.40589	9.02655	0.252844	0.168706	0.872759	-0.231384	0.0652235	-0.0217357	0.135353	0.0154336	1.03307
	Seriphidium transiliense	0.306811	1.88522	20.285	0.418757	0.306811	1.03593	-0.36128	0.0612595	-0.0639595	0.0896656	0.19182	1.20748
	Seriphidium transiliense	0.233063	1.60778	11.5256	0.377111	0.233063	0.68867	-0.338052	0.113968	-0.0421848	0.184644	0.0408825	0.997549
	Seriphidium transiliense	0.332676	1.99705	18.4174	0.42959	0.332676	1.20127	-0.38289	0.0575434	-0.040569	0.111208	0.186949	1.1626
	Seriphidium transiliense	0.287479	1.80694	17.7167	0.359032	0.287479	1.38092	-0.319638	0.035413	-0.0313631	0.0912201	0.1693	1.14252
	Seriphidium transiliense	0.20045	1.50141	9.61589	0.302607	0.20045	0.822062	-0.267603	0.0709601	-0.0386226	0.110942	0.0515534	1.02122
	Seriphidium transiliense	0.231218	1.60152	8.5596	0.373095	0.231218	0.687342	-0.334863	0.112344	-0.0482578	0.188069	0.0727287	1.0582
	Seriphidium transiliense	0.321704	1.94857	17.1266	0.43527	0.321704	1.05222	-0.386499	0.0739957	-0.0456538	0.107091	0.153548	1.09474
	Seriphidium transiliense	0.408049	2.37866	20.5575	0.498886	0.408049	1.38899	-0.44119	0.0404165	-0.0431715	0.0674004	0.237929	1.17796
	Seriphidium transiliense	0.351511	2.08409	21.4501	0.472828	0.351511	1.06706	-0.434086	0.0974433	-0.0388259	0.127316	0.158307	1.15135
	Seriphidium transiliense	0.18108	1.44224	9.85541	0.281097	0.18108	0.780168	-0.25825	0.080956	-0.0218765	0.132574	0.0233037	1.01025
	Seriphidium transiliense	0.201522	1.50477	8.90852	0.316123	0.201522	0.743532	-0.281668	0.0849685	-0.0389542	0.125348	0.0612431	1.05728
	Seriphidium transiliense	0.303025	1.86954	13.2402	0.362081	0.303025	1.58869	-0.31436	0.0125281	-0.0521661	0.0377234	0.208848	1.19868
	Seriphidium transiliense	0.208375	1.52645	10.1672	0.284973	0.208375	1.08974	-0.258116	0.0525683	-0.0275601	0.0893293	0.055342	0.995414
	Seriphidium transiliense	0.28341	1.791	13.244	0.364692	0.28341	1.23789	-0.322632	0.0431694	-0.0319369	0.0695539	0.130016	1.07797
	Seriphidium transiliense	0.274715	1.75753	13.317	0.371526	0.274715	1.06739	-0.33439	0.0657116	-0.0370242	0.0928929	0.10922	1.07973
	Seriphidium transiliense	0.342289	2.04085	19.4178	0.446261	0.342289	1.16478	-0.393426	0.0590957	-0.0435661	0.117674	0.194714	1.15148
	Seriphidium transiliense	0.374611	2.19801	22.4881	0.4497	0.374611	1.5023	-0.38915	0.0170202	-0.046691	0.0671086	0.244887	1.2017
	Seriphidium transiliense	0.338172	2.02193	15.5911	0.462013	0.338172	1.01896	-0.415847	0.0903863	-0.0532057	0.138133	0.21158	1.22625
	Seriphidium transiliense	0.271785	1.74644	15.736	0.373061	0.271785	1.02919	-0.332914	0.0672099	-0.0274172	0.102769	0.114769	1.12722
	Seriphidium transiliense	0.289725	1.81581	16.4216	0.383261	0.289725	1.13716	-0.338764	0.0543764	-0.0269426	0.0775246	0.150706	1.18829
	Seriphidium transiliense	0.234866	1.61392	14.9924	0.327543	0.234866	1.00743	-0.285829	0.0546309	-0.0394235	0.0805323	0.104204	1.11766
	Seriphidium transiliense	0.298278	1.85013	14.3099	0.377543	0.298278	1.2963	-0.326435	0.0311941	-0.0436289	0.0570903	0.191076	1.18964
	Seriphidium transiliense	0.241907	1.6382	13.8451	0.382853	0.241907	0.724891	-0.346935	0.11465	-0.0423531	0.171242	0.0976032	1.10832
	Seriphidium transiliense	0.3597	2.12353	14.3613	0.477136	0.3597	1.09539	-0.429244	0.0822431	-0.044546	0.108818	0.166353	1.11202
	Seriphidium transiliense	0.221518	1.5691	9.74253	0.317209	0.221518	0.931556	-0.290077	0.0732662	-0.0259574	0.115485	0.0561001	1.00577
	Seriphidium transiliense	0.42103	2.45441	19.8657	0.473888	0.42103	1.85818	-0.410743	-0.0124387	-0.0551592	0.0383139	0.343122	1.38715
	Seriphidium transiliense	0.294674	1.83557	9.46065	0.374924	0.294674	1.25448	-0.344352	0.0552882	-0.0311418	0.0735511	0.132339	1.1076
	Seriphidium transiliense	0.32656	1.96983	13.5085	0.415184	0.32656	1.25205	-0.360563	0.0385405	-0.059215	0.0718081	0.208476	1.20482
	Seriphidium transiliense	0.24885	1.66258	8.33674	0.373172	0.24885	0.80802	-0.326282	0.0842755	-0.0434577	0.132325	0.0845728	1.03171
	Seriphidium transiliense	0.192394	1.47646	10.6694	0.320674	0.192394	0.652612	-0.305147	0.119784	-0.027735	0.209154	0.000557333	1.00564
	Seriphidium transiliense	0.373536	2.19252	13.3727	0.46321	0.373536	1.32555	-0.422482	0.0581181	-0.0511582	0.0808949	0.218652	1.23242
	Seriphidium transiliense	0.272159	1.74785	13.0766	0.389968	0.272159	0.911221	-0.350914	0.0870705	-0.0339767	0.134867	0.1026	1.06026
	Seriphidium transiliense	0.315446	1.92161	17.5457	0.421625	0.315446	1.09158	-0.378558	0.071671	-0.0384652	0.103354	0.150771	1.10398
	Seriphidium transiliense	0.150431	1.35413	7.98652	0.286416	0.150431	0.501647	-0.264772	0.119084	-0.0262983	0.215035	-0.0123495	0.999422
	Seriphidium transiliense	0.255163	1.68515	8.50581	0.319872	0.255163	1.36698	-0.275103	0.0214458	-0.0316698	0.0397168	0.110301	1.04531
	Seriphidium transiliense	0.354715	2.0994	19.2964	0.414502	0.354715	1.67704	-0.344572	-0.0115551	-0.0633626	0.0366	0.273183	1.27835
	Seriphidium transiliense	0.24774	1.65865	10.4353	0.328511	0.24774	1.14821	-0.270069	0.0239303	-0.0550236	0.0690258	0.175749	1.17026
	Seriphidium transiliense	0.274799	1.75785	12.6303	0.383273	0.274799	0.976684	-0.341176	0.0732442	-0.0418614	0.102662	0.116197	1.06876
	Seriphidium transiliense	0.214282	1.54544	10.1849	0.307229	0.214282	0.936286	-0.278548	0.0683458	-0.0287056	0.093924	0.0596546	1.00795
	Seriphidium transiliense	0.269407	1.7375	12.5592	0.399103	0.269407	0.838279	-0.358784	0.0989398	-0.0359327	0.14603	0.0841535	1.02956
	Seriphidium transiliense	0.257408	1.69327	14.3942	0.356922	0.257408	1.00601	-0.316955	0.0648364	-0.0444288	0.106412	0.13071	1.1201
	Seriphidium transiliense	0.239399	1.6295	9.76317	0.33493	0.239399	0.980363	-0.308584	0.074703	-0.0296084	0.0997692	0.0813303	1.019
	Seriphidium transiliense	0.183364	1.44907	6.53138	0.261329	0.183364	0.973541	-0.236566	0.0556142	-0.0314738	0.100101	0.0859523	1.08806
	Seriphidium transiliense	0.312948	1.91099	17.1241	0.429689	0.312948	1.0136	-0.390436	0.0882738	-0.0489835	0.117317	0.140377	1.12383
	Seriphidium transiliense	0.302922	1.86912	16.5924	0.420424	0.302922	0.986929	-0.379237	0.0862195	-0.0404446	0.113993	0.119049	1.04905
	Seriphidium transiliense	0.319252	1.93794	18.2507	0.432179	0.319252	1.05303	-0.384836	0.0747708	-0.0445004	0.0927656	0.166765	1.11611
	Seriphidium transiliense	0.203036	1.50952	9.51071	0.35976	0.203036	0.570597	-0.338594	0.145564	-0.0256114	0.256384	-0.00971384	0.957679
	Seriphidium transiliense	0.368908	2.16911	17.6582	0.478573	0.368908	1.16996	-0.422651	0.0636699	-0.0510758	0.0770183	0.209385	1.13418
	Seriphidium transiliense	0.250129	1.66712	16.8409	0.392543	0.250129	0.740436	-0.345129	0.103976	-0.0555801	0.131239	0.0950997	1.08882
	Seriphidium transiliense	0.310929	1.90246	15.9587	0.4109	0.310929	1.12726	-0.368199	0.0646737	-0.0500585	0.0905472	0.16771	1.15911
	Seriphidium transiliense	0.199773	1.49929	12.662	0.375865	0.199773	0.512032	-0.342518	0.15323	-0.0554636	0.242009	0.0390077	1.01785
	Seriphidium transiliense	0.238955	1.62796	18.0604	0.38677	0.238955	0.693547	-0.35119	0.122517	-0.0464271	0.185144	0.070814	1.06218
	Seriphidium transiliense	0.239801	1.63089	13.6799	0.362406	0.239801	0.807718	-0.327163	0.0947999	-0.0374952	0.142019	0.0655851	0.998841
	Seriphidium transiliense	0.270115	1.74016	13.2119	0.371382	0.270115	1.02021	-0.330238	0.0660108	-0.0407988	0.0949478	0.108691	1.05464
	Seriphidium transiliense	0.293314	1.83011	14.0402	0.376201	0.293314	1.24444	-0.343246	0.0555222	-0.0411871	0.078477	0.150002	1.13706
	Seriphidium transiliense	0.257402	1.69325	11.8009	0.389705	0.257402	0.79683	-0.357434	0.110167	-0.0398963	0.15366	0.0742439	1.03239
	Seriphidium transiliense	0.275233	1.75951	14.1773	0.375554	0.275233	1.04185	-0.332548	0.0630893	-0.044952	0.0839275	0.11088	1.03895
	Seriphidium transiliense	0.226803	1.58666	15.982	0.404316	0.226803	0.569436	-0.380384	0.168081	-0.0441826	0.276234	0.00101279	0.965386
	Seriphidium transiliense	0.234199	1.61164	11.7045	0.407658	0.234199	0.593238	-0.377459	0.157153	-0.0422786	0.198564	0.0408467	1.02013
	Seriphidium transiliense	0.245465	1.65064	14.9901	0.338173	0.245465	1.03519	-0.297107	0.055704	-0.0403267	0.08105	0.117709	1.09578
	Seriphidium transiliense	0.282445	1.78724	13.7175	0.39224	0.282445	0.987416	-0.356522	0.082371	-0.0509613	0.112357	0.152602	1.12719
	Seriphidium transiliense	0.292144	1.82543	15.5653	0.411477	0.292144	0.950946	-0.369612	0.0868457	-0.0598971	0.127936	0.160078	1.14763
	Seriphidium transiliense	0.255964	1.68804	14.9099	0.398939	0.255964	0.749625	-0.363251	0.118285	-0.0408679	0.156854	0.0745313	1.00658
	Seriphidium transiliense	0.275401	1.76015	15.9847	0.369503	0.275401	1.0984	-0.335351	0.0660493	-0.0355965	0.0736146	0.126828	1.05684
	Seriphidium transiliense	0.298192	1.84978	14.296	0.415857	0.298192	0.972091	-0.375008	0.0864873	-0.0425422	0.113651	0.123033	1.04916
	Seriphidium transiliense	0.28321	1.79022	17.1757	0.377591	0.28321	1.11616	-0.33153	0.0533269	-0.0422925	0.0672265	0.137001	1.05453
	Seriphidium transiliense	0.352557	2.08908	23.7195	0.452632	0.352557	1.22034	-0.416003	0.0743506	-0.0464492	0.0979743	0.181454	1.14798
	Seriphidium transiliense	0.260328	1.7039	10.4251	0.365913	0.260328	0.956903	-0.311919	0.0561506	-0.0442103	0.0805377	0.134874	1.05929
	Seriphidium transiliense	0.356767	2.1093	15.7708	0.516761	0.356767	0.883343	-0.471375	0.137778	-0.0639876	0.145967	0.152319	1.11591
	Seriphidium transiliense	0.255704	1.6871	10.1089	0.413016	0.255704	0.687449	-0.36375	0.119126	-0.0551546	0.169007	0.0993157	1.03655
	Seriphidium transiliense	0.246003	1.65253	12.5784	0.326809	0.246003	1.15207	-0.287498	0.0446534	-0.0343772	0.0677377	0.117599	1.01906
	Seriphidium transiliense	0.226847	1.58681	10.7058	0.337536	0.226847	0.839656	-0.288201	0.0656462	-0.0472471	0.103487	0.0809361	1.01446
	Seriphidium transiliense	0.22285	1.5735	9.78756	0.318405	0.22285	0.936475	-0.275538	0.056135	-0.02858	0.102454	0.113368	1.02945
	Seriphidium transiliense	0.332565	1.99655	15.4464	0.444064	0.332565	1.08494	-0.383995	0.0589588	-0.0682512	0.0928837	0.209613	1.19241
	Seriphidium transiliense	0.324706	1.96167	19.8152	0.409137	0.324706	1.30584	-0.370913	0.0525337	-0.0414925	0.0832138	0.191117	1.20102
	Seriphidium transiliense	0.315241	1.92073	19.6336	0.421219	0.315241	1.09554	-0.373845	0.0664334	-0.0520329	0.0978128	0.188408	1.17561
	Seriphidium transiliense	0.338554	2.02368	27.0918	0.44319	0.338554	1.16028	-0.395428	0.0656649	-0.059447	0.0917895	0.201472	1.17383
	Seriphidium transiliense	0.314423	1.91725	25.4946	0.438666	0.314423	0.978828	-0.390703	0.0869632	-0.0570135	0.110525	0.150974	1.0539
	Seriphidium transiliense	0.318856	1.93623	29.1789	0.42935	0.318856	1.07827	-0.378672	0.0680307	-0.0472839	0.0979455	0.188443	1.1654
	Seriphidium transiliense	0.34602	2.0582	17.0527	0.505007	0.34602	0.869302	-0.459545	0.13499	-0.0645967	0.152248	0.128898	1.12222
	Seriphidium transiliense	0.216987	1.55424	15.8448	0.360864	0.216987	0.655261	-0.332333	0.12431	-0.0401569	0.171586	0.0481613	1.03476
	Seriphidium transiliense	0.237832	1.62409	15.5029	0.312945	0.237832	1.20922	-0.271307	0.0357845	-0.0426815	0.0719394	0.138395	1.15634
	Seriphidium transiliense	0.271458	1.74521	17.0671	0.356448	0.271458	1.17994	-0.317045	0.0498803	-0.0364969	0.0623043	0.120916	1.08263
	Seriphidium transiliense	0.208132	1.52567	9.82126	0.319804	0.208132	0.781335	-0.291411	0.0886563	-0.0207599	0.145391	0.0529133	1.01009
	Seriphidium transiliense	0.253846	1.68041	11.5222	0.357946	0.253846	0.955327	-0.320356	0.0723979	-0.0341654	0.103548	0.103297	1.0602
	Seriphidium transiliense	0.238187	1.62532	15.2893	0.352383	0.238187	0.854803	-0.313022	0.0808639	-0.0444578	0.120427	0.0863582	1.03977
	Seriphidium transiliense	0.208701	1.52749	10.922	0.32394	0.208701	0.764136	-0.283705	0.0797238	-0.0516919	0.128206	0.0709633	1.04141
	Seriphidium transiliense	0.25437	1.68229	14.061	0.358055	0.25437	0.965474	-0.317612	0.0688012	-0.0385907	0.106516	0.113175	1.08077
	Seriphidium transiliense	0.210097	1.53196	12.3067	0.307771	0.210097	0.890475	-0.277662	0.0717507	-0.0355049	0.10959	0.0717097	1.00654
	Seriphidium transiliense	0.254181	1.68162	11.1258	0.384035	0.254181	0.800075	-0.345018	0.0995687	-0.0366113	0.171996	0.115784	1.02468
	Seriphidium transiliense	0.143586	1.33532	10.2745	0.24918	0.143586	0.621649	-0.23074	0.090141	-0.0189967	0.161929	-0.00129708	0.954368
	Seriphidium transiliense	0.120465	1.27393	7.2269	0.228787	0.120465	0.520679	-0.218226	0.1004	-0.0155494	0.206659	-0.0362232	0.955846
	Seriphidium transiliense	0.173941	1.42113	9.82551	0.300547	0.173941	0.607976	-0.285179	0.117044	-0.0207703	0.218627	-0.0189013	0.962219
	Seriphidium transiliense	0.285718	1.80001	13.3222	0.392727	0.285718	1.0134	-0.346329	0.0672671	-0.0413274	0.111413	0.151888	1.05487
	Seriphidium transiliense	0.311273	1.90391	16.5731	0.394755	0.311273	1.28248	-0.345789	0.0386798	-0.0451013	0.0964097	0.222008	1.1953
	Seriphidium transiliense	0.242193	1.6392	9.95872	0.328105	0.242193	1.07695	-0.273212	0.0332164	-0.0457542	0.0783951	0.168632	1.10313
	Seriphidium transiliense	0.263786	1.7166	12.8196	0.384648	0.263786	0.873511	-0.34188	0.0858349	-0.0477487	0.128986	0.0956925	1.0484
	Seriphidium transiliense	0.259978	1.70262	15.4898	0.354216	0.259978	1.05911	-0.317343	0.062524	-0.0401646	0.0954363	0.115941	1.08972
	Seriphidium transiliense	0.279477	1.77576	12.0243	0.390282	0.279477	0.969958	-0.342383	0.0695625	-0.0482808	0.0738718	0.140417	1.14797
	Seriphidium transiliense	0.266108	1.7252	19.9697	0.419949	0.266108	0.73225	-0.384217	0.13156	-0.0486287	0.206954	0.0545193	1.03848
	Seriphidium transiliense	0.257636	1.69409	10.7104	0.375994	0.257636	0.868951	-0.332017	0.0813397	-0.0526777	0.104504	0.100643	1.10733
	Seriphidium transiliense	0.162282	1.38744	8.52408	0.265867	0.162282	0.692791	-0.240626	0.0815279	-0.022256	0.144015	0.00860104	0.992356
	Seriphidium transiliense	0.267028	1.72862	11.774	0.354512	0.267028	1.12981	-0.316463	0.0539986	-0.0367792	0.0706914	0.115063	1.12345
	Seriphidium transiliense	0.24709	1.65636	9.02354	0.345757	0.24709	0.971078	-0.313048	0.0714872	-0.0366248	0.123501	0.106808	1.11136
	Seriphidium transiliense	0.329612	1.98335	14.1782	0.416535	0.329612	1.2766	-0.373362	0.0498888	-0.0448223	0.074303	0.173385	1.16268
	Seriphidium transiliense	0.328472	1.97828	15.4968	0.417157	0.328472	1.26116	-0.375625	0.0537889	-0.0418663	0.082895	0.160141	1.13717
	Seriphidium transiliense	0.320381	1.94283	15.7653	0.397586	0.320381	1.3689	-0.358355	0.0428983	-0.0395245	0.0669626	0.175692	1.16426
	Seriphidium transiliense	0.175648	1.42615	9.07156	0.264503	0.175648	0.851117	-0.236221	0.0631944	-0.0324898	0.103404	0.0509553	1.04892
	Seriphidium transiliense	0.216466	1.55254	8.14964	0.32938	0.216466	0.790977	-0.303313	0.0929494	-0.0294283	0.14731	0.0275611	0.992969
	Seriphidium transiliense	0.215728	1.55014	11.2422	0.315192	0.215728	0.88989	-0.282042	0.0706106	-0.0311508	0.131289	0.073157	0.992479
	Seriphidium transiliense	0.282939	1.78916	19.9597	0.417755	0.282939	0.851166	-0.385379	0.114977	-0.0508426	0.152537	0.0707419	1.07074
	Seriphidium transiliense	0.280603	1.78011	13.5561	0.36017	0.280603	1.25227	-0.316369	0.03925	-0.0415593	0.0715411	0.188184	1.18134
	Seriphidium transiliense	0.320126	1.94172	10.9476	0.41287	0.320126	1.19145	-0.371006	0.0577369	-0.0396029	0.0824637	0.155314	1.12078
	Seriphidium transiliense	0.230174	1.59799	9.28075	0.367325	0.230174	0.706216	-0.324526	0.101969	-0.0535366	0.155148	0.0534616	1.03968
	Seriphidium transiliense	0.26565	1.7235	10.208	0.351428	0.26565	1.13696	-0.320921	0.0604221	-0.0327353	0.0873048	0.0900899	1.04548
	Seriphidium transiliense	0.237542	1.62309	10.6636	0.338141	0.237542	0.938099	-0.310661	0.0789452	-0.0344595	0.133376	0.0709948	1.08302
	Seriphidium transiliense	0.307205	1.88686	15.317	0.420148	0.307205	1.02329	-0.37413	0.0756156	-0.0527119	0.102778	0.149375	1.09579
	Seriphidium transiliense	0.301358	1.8627	14.5305	0.463745	0.301358	0.769178	-0.416515	0.131686	-0.0566149	0.174454	0.12201	1.05331
	Seriphidium transiliense	0.284546	1.79543	18.8508	0.38309	0.284546	1.08581	-0.334513	0.0552228	-0.038569	0.081185	0.134735	1.07751
	Seriphidium transiliense	0.280428	1.77943	14.432	0.430192	0.280428	0.774375	-0.400894	0.135725	-0.0421085	0.197232	0.0520044	0.99658
	Seriphidium transiliense	0.32564	1.96577	22.2165	0.41244	0.32564	1.28689	-0.366033	0.0458588	-0.0477397	0.0719033	0.197036	1.20252
	Seriphidium transiliense	0.228201	1.59135	15.93	0.367952	0.228201	0.699334	-0.329102	0.109094	-0.0428411	0.198826	0.0872068	1.04786
	Seriphidium transiliense	0.284574	1.79554	21.3469	0.38641	0.284574	1.06193	-0.339441	0.0607329	-0.0447991	0.106712	0.156038	1.10381
	Seriphidium transiliense	0.327226	1.97277	14.5974	0.442205	0.327226	1.04963	-0.395494	0.0784165	-0.0435852	0.115364	0.181176	1.10566
	Seriphidium transiliense	0.258188	1.6961	17.0962	0.377361	0.258188	0.876095	-0.337295	0.0866528	-0.045476	0.136911	0.181756	1.16895
	Seriphidium transiliense	0.342454	2.04161	24.4711	0.440813	0.342454	1.216	-0.39338	0.0588545	-0.0582284	0.0895909	0.248108	1.25292
	Seriphidium transiliense	0.317417	1.93005	21.4371	0.447529	0.317417	0.949526	-0.401024	0.0958023	-0.0614246	0.141471	0.188073	1.19098
	Seriphidium transiliense	0.315113	1.92019	19.9693	0.480952	0.315113	0.788152	-0.440873	0.14605	-0.0503484	0.187462	0.0869439	1.07364
	Seriphidium transiliense	0.268165	1.73286	13.8322	0.338131	0.268165	1.34962	-0.290611	0.0243433	-0.0422356	0.0466107	0.142128	1.08761
	Seriphidium transiliense	0.266067	1.72504	13.3729	0.36688	0.266067	1.01453	-0.314632	0.053002	-0.0529572	0.0895138	0.137999	1.06619
	Seriphidium transiliense	0.32316	1.95491	14.6632	0.427252	0.32316	1.11746	-0.393181	0.0802126	-0.0367486	0.112312	0.182927	1.18606
	Seriphidium transiliense	0.314661	1.91826	14.0629	0.428052	0.314661	1.03341	-0.381718	0.0762104	-0.0427471	0.123515	0.175572	1.09618
	Seriphidium transiliense	0.281106	1.78205	12.0323	0.337541	0.281106	1.59287	-0.308682	0.0301959	-0.0267524	0.0599084	0.159736	1.0798
	Seriphidium transiliense	0.289191	1.8137	11.4769	0.417047	0.289191	0.888848	-0.374566	0.0957461	-0.0605182	0.16798	0.173263	1.16278
	Seriphidium transiliense	0.387714	2.26645	13.6365	0.479343	0.387714	1.33213	-0.438771	0.0615236	-0.0520521	0.104899	0.278208	1.25528
	Seriphidium transiliense	0.323621	1.95692	9.0795	0.392457	0.323621	1.44234	-0.355004	0.0354564	-0.0374757	0.0751645	0.212017	1.18784
	Seriphidium transiliense	0.334033	2.00315	19.393	0.450812	0.334033	1.05913	-0.405262	0.0823812	-0.0513439	0.139871	0.215293	1.19321
	Seriphidium transiliense	0.229912	1.5971	14.1463	0.389849	0.229912	0.627003	-0.367692	0.150504	-0.038379	0.241898	-0.00650104	0.969319
	Seriphidium transiliense	0.326027	1.96748	20.9118	0.429065	0.326027	1.14173	-0.382532	0.0645559	-0.0391455	0.10636	0.181986	1.16125
	Seriphidium transiliense	0.286724	1.80396	9.74452	0.367539	0.286724	1.23366	-0.315184	0.031288	-0.0512721	0.0763726	0.194283	1.15408
	Seriphidium transiliense	0.271329	1.74472	8.20369	0.383097	0.271329	0.931369	-0.348525	0.0852583	-0.0341379	0.14986	0.121531	1.02188
	Seriphidium transiliense	0.32804	1.97637	15.0899	0.445839	0.32804	1.03437	-0.390403	0.0715228	-0.0643577	0.104209	0.204071	1.18555
	Seriphidium transiliense	0.406023	2.36713	16.4382	0.499255	0.406023	1.3559	-0.446453	0.0493821	-0.0621574	0.0734209	0.266336	1.20784
	Seriphidium transiliense	0.371194	2.18063	20.6315	0.445427	0.371194	1.50363	-0.398806	0.0324092	-0.0452764	0.0627134	0.229283	1.19003
	Seriphidium transiliense	0.372928	2.18942	17.1162	0.457729	0.372928	1.38275	-0.400142	0.0319882	-0.0733743	0.0547138	0.243087	1.19388
	Seriphidium transiliense	0.26034	1.70394	14.7149	0.383419	0.26034	0.85596	-0.337847	0.0849811	-0.0455001	0.122359	0.105037	1.11871
	Seriphidium transiliense	0.33325	1.99962	15.6253	0.426178	0.33325	1.23137	-0.376186	0.0490908	-0.054596	0.0816862	0.216328	1.23142
	Seriphidium transiliense	0.356898	2.10993	21.0105	0.424884	0.356898	1.56271	-0.380611	0.0274402	-0.0270215	0.0471893	0.189041	1.14888
	Seriphidium transiliense	0.282312	1.78673	16.4114	0.448089	0.282312	0.721146	-0.402479	0.135572	-0.0593671	0.191472	0.0797958	1.01633
	Seriphidium transiliense	0.3356	2.01023	19.5206	0.427012	0.3356	1.25762	-0.382857	0.0542245	-0.0456315	0.0686538	0.177119	1.22022
	Ceratocarpus arenarius	0.266603	1.72704	9.93885	0.404616	0.364977	0.786903	-0.108978	0.108978	-0.0624292	0.161246	0.109845	1.14453
	Ceratocarpus arenarius	0.182673	1.447	7.59965	0.345557	0.311221	0.501696	-0.136296	0.136296	-0.055858	0.0708977	0.165571	1.07967
	Ceratocarpus arenarius	0.209781	1.53094	8.42586	0.329318	0.30246	0.737056	-0.0989578	0.0989578	-0.0359087	0.0607151	0.109134	1.02826
	Ceratocarpus arenarius	0.186872	1.45964	7.18319	0.372434	0.333225	0.456382	-0.156072	0.156072	-0.0481564	0.0173359	0.159691	0.975212
	Ceratocarpus arenarius	0.158915	1.37788	6.29255	0.304281	0.282442	0.490601	-0.129333	0.129333	-0.0294001	-0.00842693	0.157369	0.967405
	Ceratocarpus arenarius	0.376881	2.20966	17.302	0.490796	0.432508	1.1547	-0.0664607	0.0664607	-0.0710965	0.212994	-0.0995195	1.18003
	Ceratocarpus arenarius	0.340478	2.0325	17.0182	0.437303	0.3878	1.21452	-0.0545214	0.0545214	-0.06441	0.219751	-0.0751177	1.22298
	Ceratocarpus arenarius	0.372555	2.18753	15.3916	0.437492	0.392163	1.60944	-0.0229626	0.0229626	-0.0515363	0.260415	-0.131218	1.27133
	Ceratocarpus arenarius	0.200979	1.50306	10.1776	0.345042	0.322748	0.609564	-0.130215	0.130215	-0.0299854	0.0363327	0.14994	0.99699
	Ceratocarpus arenarius	0.183698	1.45007	10.0739	0.362981	0.343298	0.466526	-0.170343	0.170343	-0.0353693	-0.0144967	0.231957	0.964317
	Ceratocarpus arenarius	0.187412	1.46127	6.48015	0.351703	0.312598	0.506649	-0.132976	0.132976	-0.0557204	0.0682573	0.113845	1.07109
	Ceratocarpus arenarius	0.117711	1.26683	3.72966	0.330518	0.29574	0.260821	-0.18445	0.18445	-0.0603481	-0.000380871	0.23741	1.01358
	Ceratocarpus arenarius	0.184494	1.45246	6.28281	0.326059	0.298376	0.568966	-0.120516	0.120516	-0.0425565	0.0760268	0.153136	1.06867
	Ceratocarpus arenarius	0.297557	1.84721	12.7612	0.396789	0.355134	1.09705	-0.0643799	0.0643799	-0.0485921	0.190453	-0.00348902	1.18731
[truncated: 1,210 more rows]

## Sheet: Fig.5
a	Seriphidium transiliense	Ceratocarpus arenarius	Petrosimonia sibirica	Bare land	Threshold	b	Seriphidium transiliense	Ceratocarpus arenarius	Petrosimonia sibirica	Bare land	Threshold	c	Seriphidium transiliense	Ceratocarpus arenarius	Petrosimonia sibirica	Bare land	Threshold	d	Seriphidium transiliense	Ceratocarpus arenarius	Petrosimonia sibirica	Bare land	Threshold
[truncated: 101 more rows]

[truncated: 5 more sheets: Fig.4, Fig.6, Fig.7, Fig.8, Fig.9]
